# Supplementary material for: Lewis Acid-Base Adducts of α-Amino Acid-Derived Silaheterocycles and N-Methylimidazole
Source: MDPI journal article supplement (doi:10.3390/molecules28237816), 2023-11-28
Supplement: s1 [file s1]

# Lewis Acid-Base-Adducts of $\alpha$ -Amino Acid Derived Silaheterocycles and N-Methylimidazole

Anne Seidel <sup>1</sup>, Robert Gericke <sup>2</sup>, Beate Kutzner <sup>1</sup> and Jörg Wagler <sup>1,\*</sup>

<sup>1</sup> Technische Universität Bergakademie Freiberg, Institut für Anorganische Chemie, Leipziger Straße 29, 09596 Freiberg, Germany

<sup>2</sup> Helmholtz-Zentrum Dresden-Rossendorf e.V., Institute of Resource Ecology, Bautzner Landstraße 400, 01328 Dresden, Germany

## Supporting Information:

Content:

- <sup>29</sup>Si{<sup>1</sup>H} NMR spectra of CDCl<sub>3</sub> solutions of the isolated compounds **(Aib)SiMe<sub>2</sub>-NMI · CHCl<sub>3</sub>** and **(Phg)SiMe<sub>2</sub>-NMI · 2CHCl<sub>3</sub>**.
- <sup>1</sup>H <sup>13</sup>C{<sup>1</sup>H} and <sup>29</sup>Si{<sup>1</sup>H} INEPT NMR spectra of raw CDCl<sub>3</sub> solutions of the syntheses of **(Aib)SiMe<sub>2</sub>-NMI**, **(Phg)SiMe<sub>2</sub>-NMI** and **(Val)SiMe<sub>2</sub>-NMI**.
- Graphics and tables with Cartesian coordinates of optimized molecular structures of compounds **(Amac)SiMe<sub>2</sub>-NMI**, **(Amac)SiMe<sub>2</sub>-CHCl<sub>3</sub>**, **(Amac)SiMe<sub>2</sub>-NMI-CHCl<sub>3</sub>** and **(Amac)SiMe<sub>2</sub>** (*Amac* = Aib, Phg, Val).

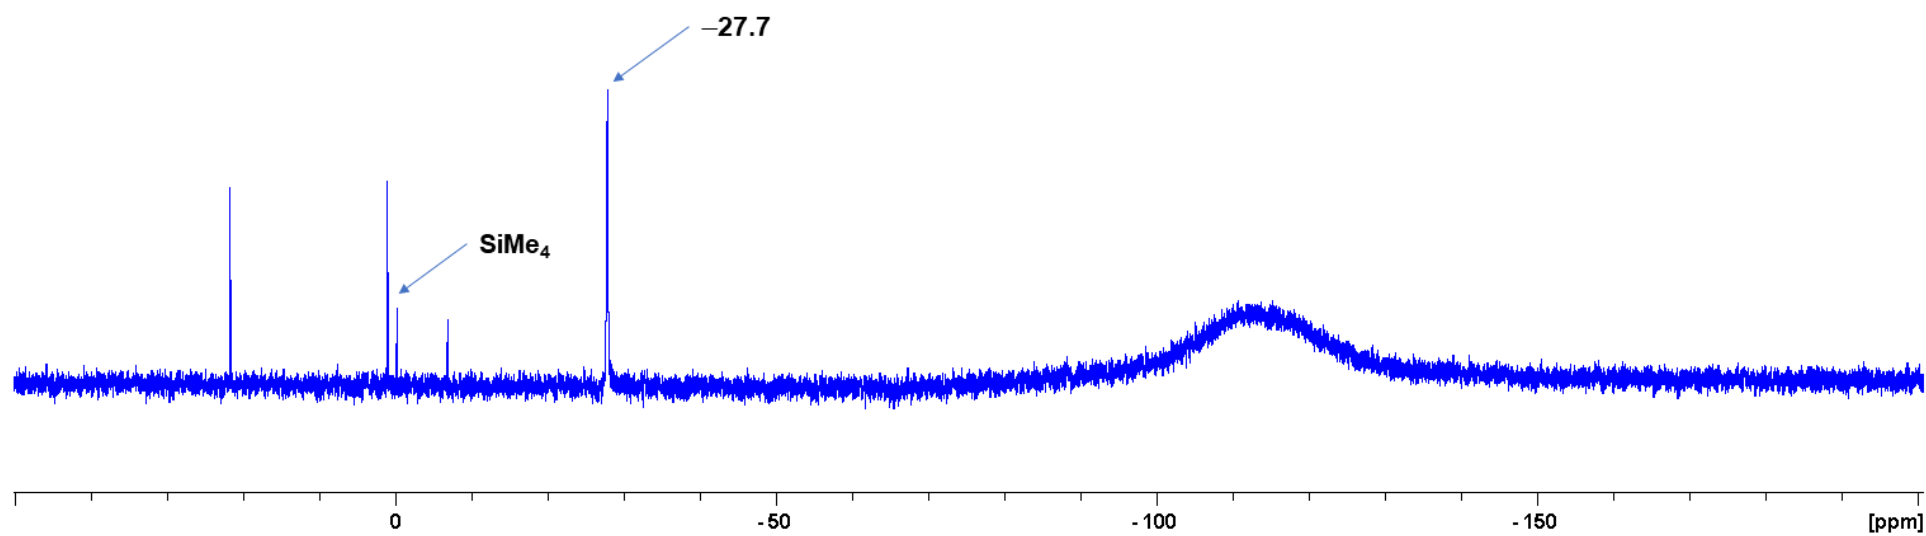

**Figure S1.**  $^{29}\text{Si}\{^1\text{H}\}$  NMR spectrum of a solution of previously isolated  $(\text{Aib})\text{SiMe}_2\text{-NMI} \cdot \text{CHCl}_3$  in  $\text{CDCl}_3$ .

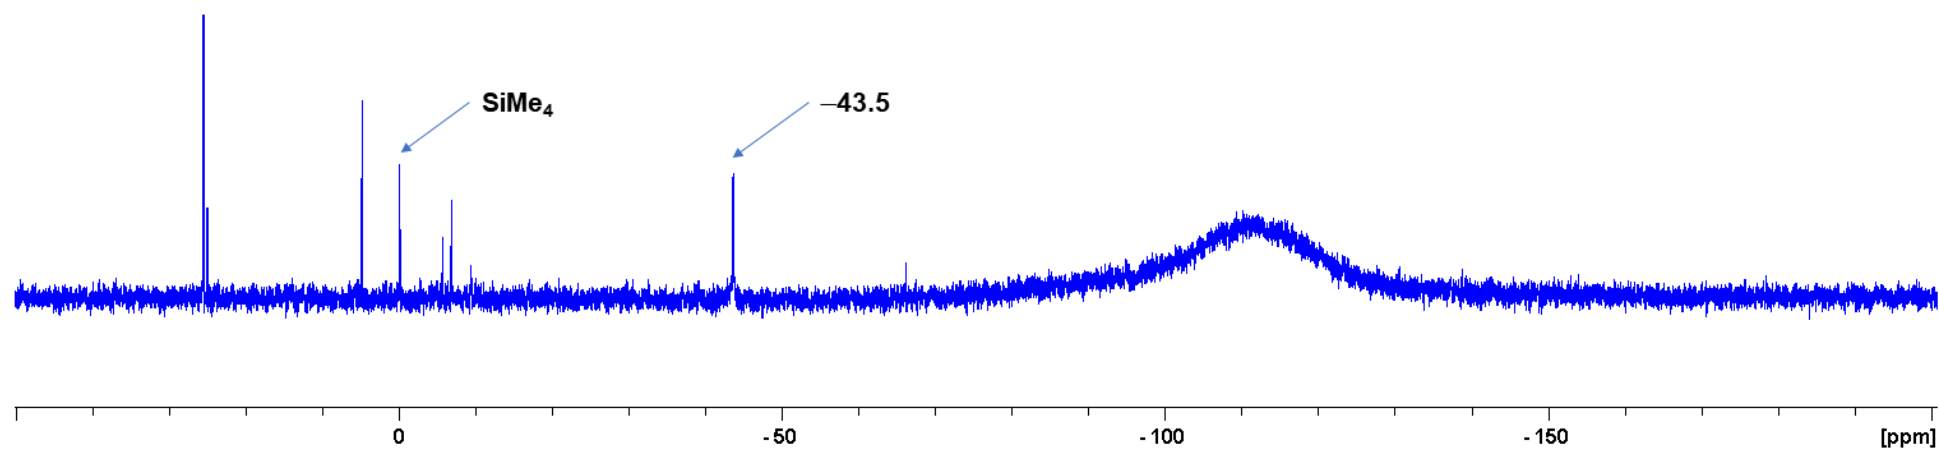

**Figure S2.**  $^{29}\text{Si}\{^1\text{H}\}$  NMR spectrum of a solution of previously isolated  $(\text{Phg})\text{SiMe}_2\text{-NMI} \cdot 2\text{CHCl}_3$  in  $\text{CDCl}_3$ .

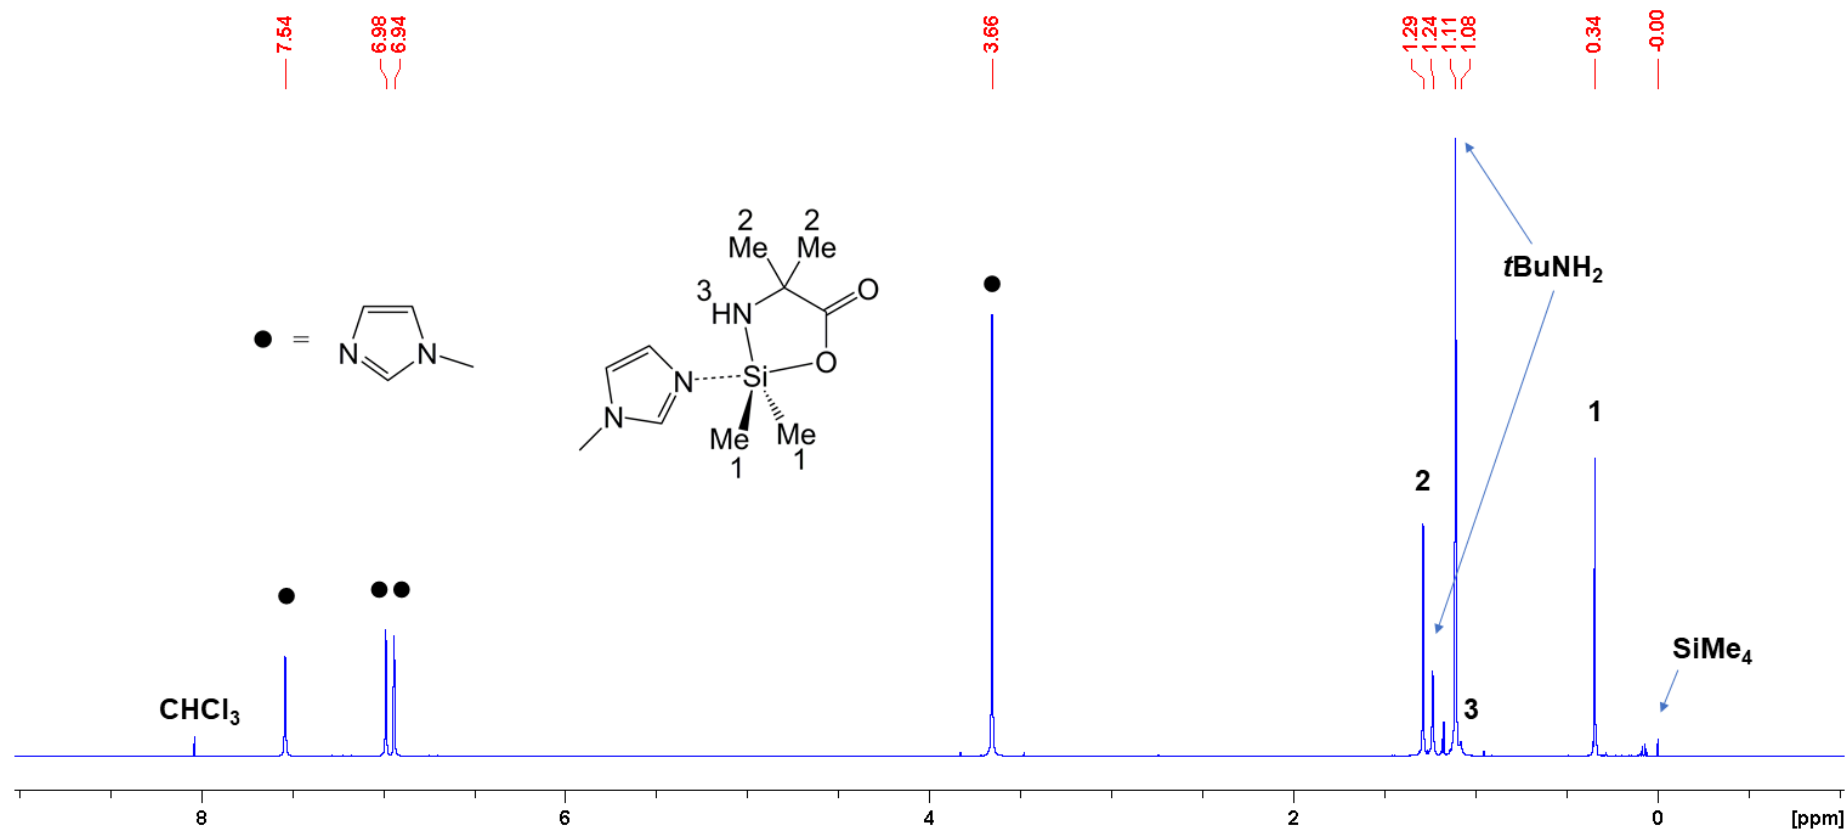

**Figure S3.**  $^1\text{H}$  NMR spectrum of a solution of **(Aib)SiMe<sub>2</sub>-NMI** in  $\text{CDCl}_3$  (in the presence of excess NMI and the reaction product  $\text{tBuNH}_2$ ). According to the amounts of starting materials used, the molar ratio of **(Aib)SiMe<sub>2</sub>** : NMI :  $\text{tBuNH}_2$  should be close to 1 : 4 : 2 (cf. sample **(Aib)SiMe<sub>2</sub>-NMI-4** mentioned in the discussion).

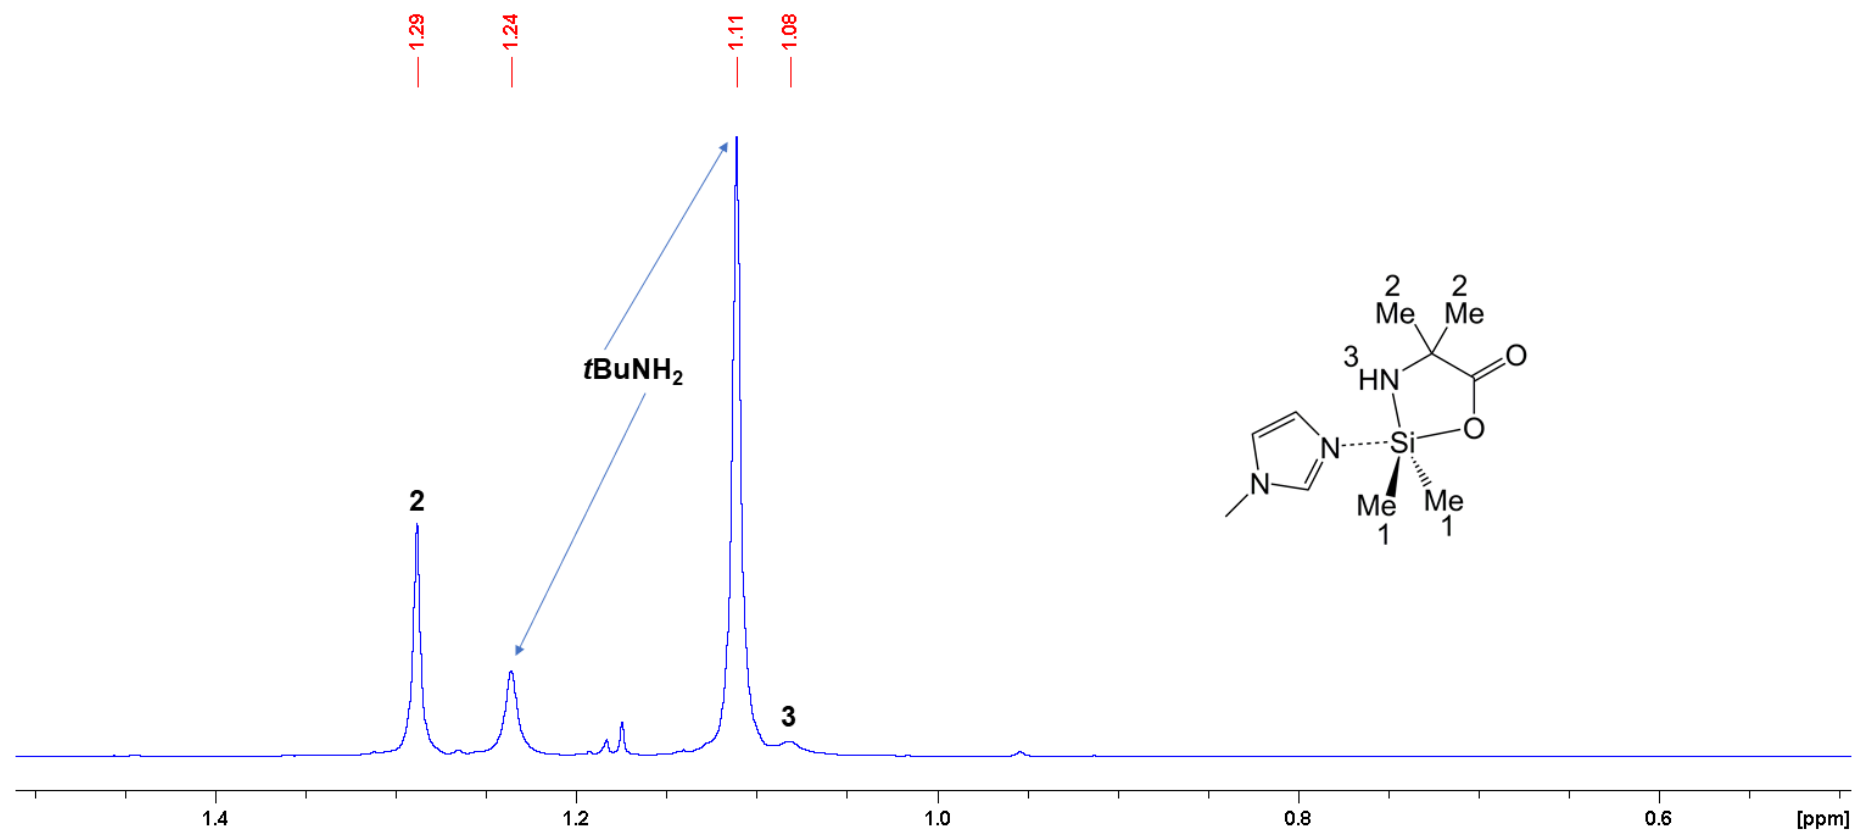

**Figure S4.** Magnified section of the  $^1\text{H}$  NMR spectrum of a solution of (Aib)SiMe<sub>2</sub>-NMI in CDCl<sub>3</sub> (in the presence of excess NMI and the reaction product tBuNH<sub>2</sub>). According to the amounts of starting materials used, the molar ratio of (Aib)SiMe<sub>2</sub> : NMI : tBuNH<sub>2</sub> should be close to 1 : 4 : 2 (cf. sample (Aib)SiMe<sub>2</sub>-NMI-4 mentioned in the discussion).

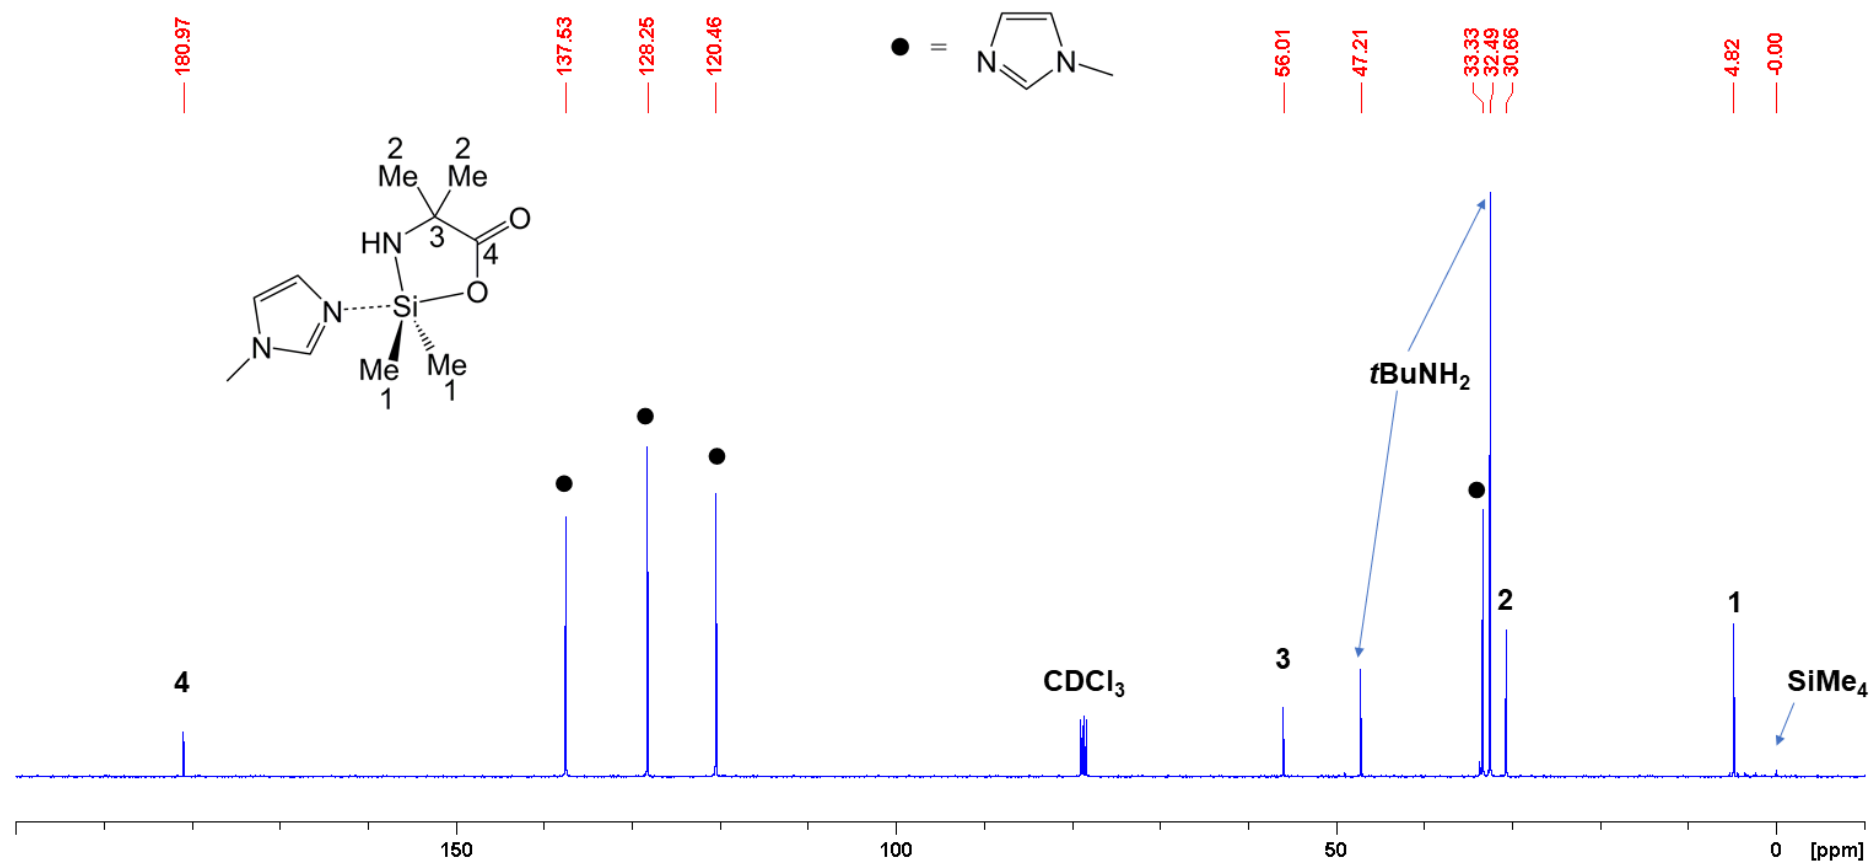

**Figure S5.**  $^{13}\text{C}\{^1\text{H}\}$  NMR spectrum of a solution of (Aib)SiMe<sub>2</sub>-NMI in CDCl<sub>3</sub> (in the presence of excess NMI and the reaction product tBuNH<sub>2</sub>). According to the amounts of starting materials used, the molar ratio of (Aib)SiMe<sub>2</sub> : NMI : tBuNH<sub>2</sub> should be close to 1 : 4 : 2 (cf. sample (Aib)SiMe<sub>2</sub>-NMI-4 mentioned in the discussion).

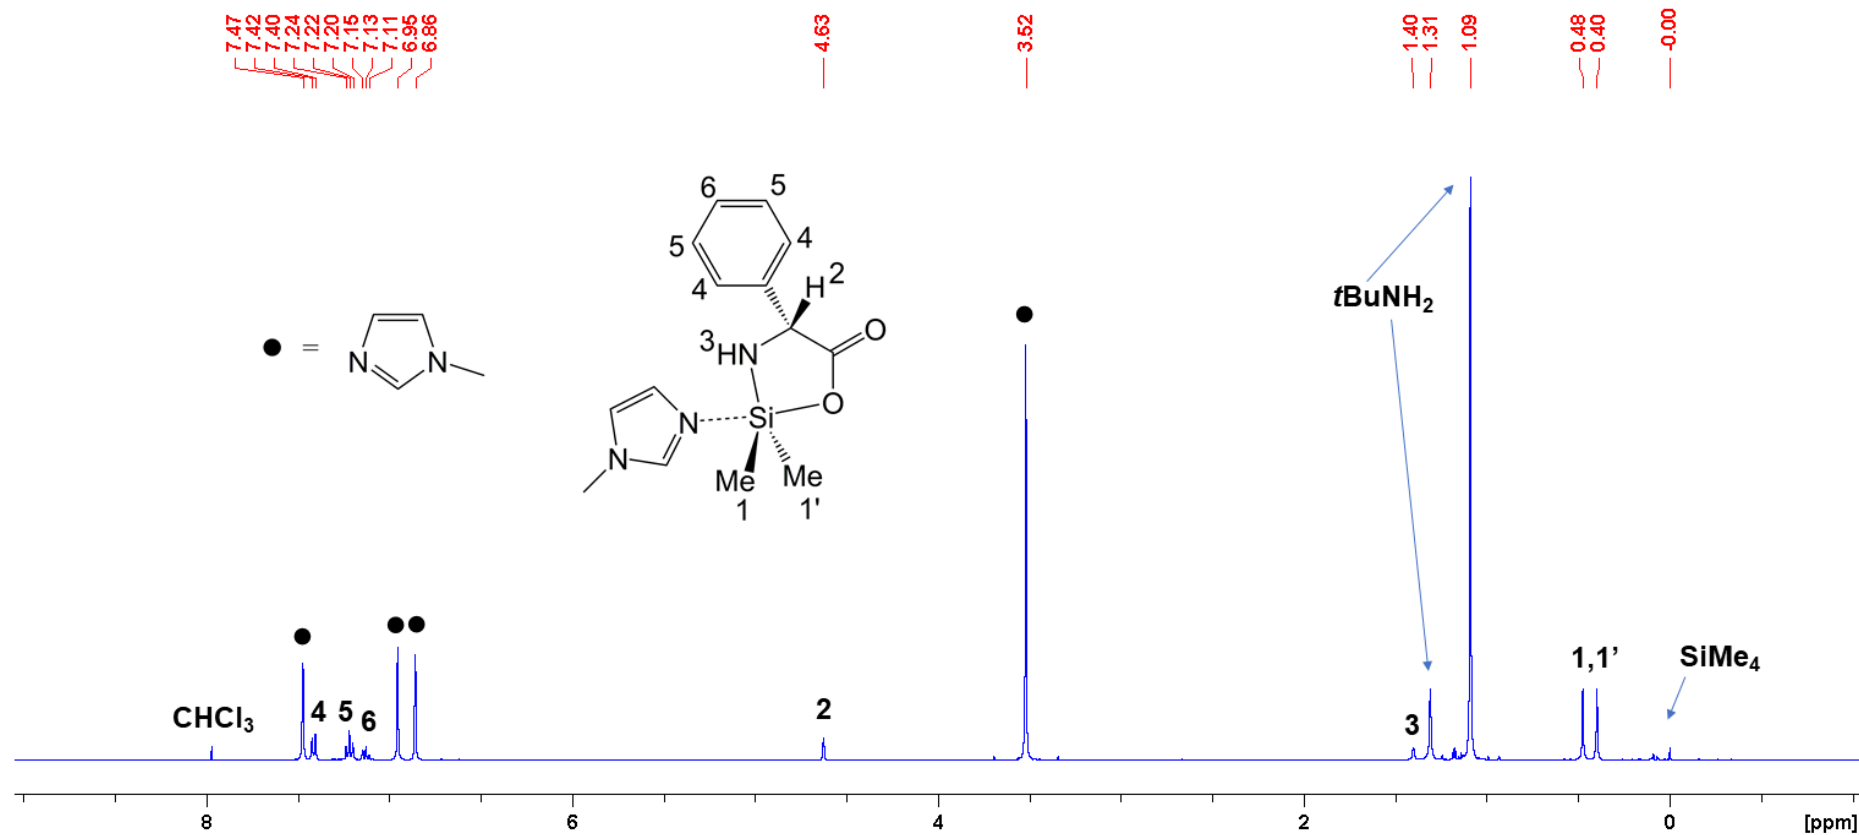

**Figure S6.**  $^1\text{H}$  NMR spectrum of a solution of **(Phg)SiMe<sub>2</sub>-NMI** in  $\text{CDCl}_3$  (in the presence of excess NMI and the reaction product  $\text{tBuNH}_2$ ). According to the amounts of starting materials used, the molar ratio of **(Phg)SiMe<sub>2</sub>** : NMI :  $\text{tBuNH}_2$  should be close to 1 : 4 : 2 (cf. sample **(Phg)SiMe<sub>2</sub>-NMI-4** mentioned in the discussion).

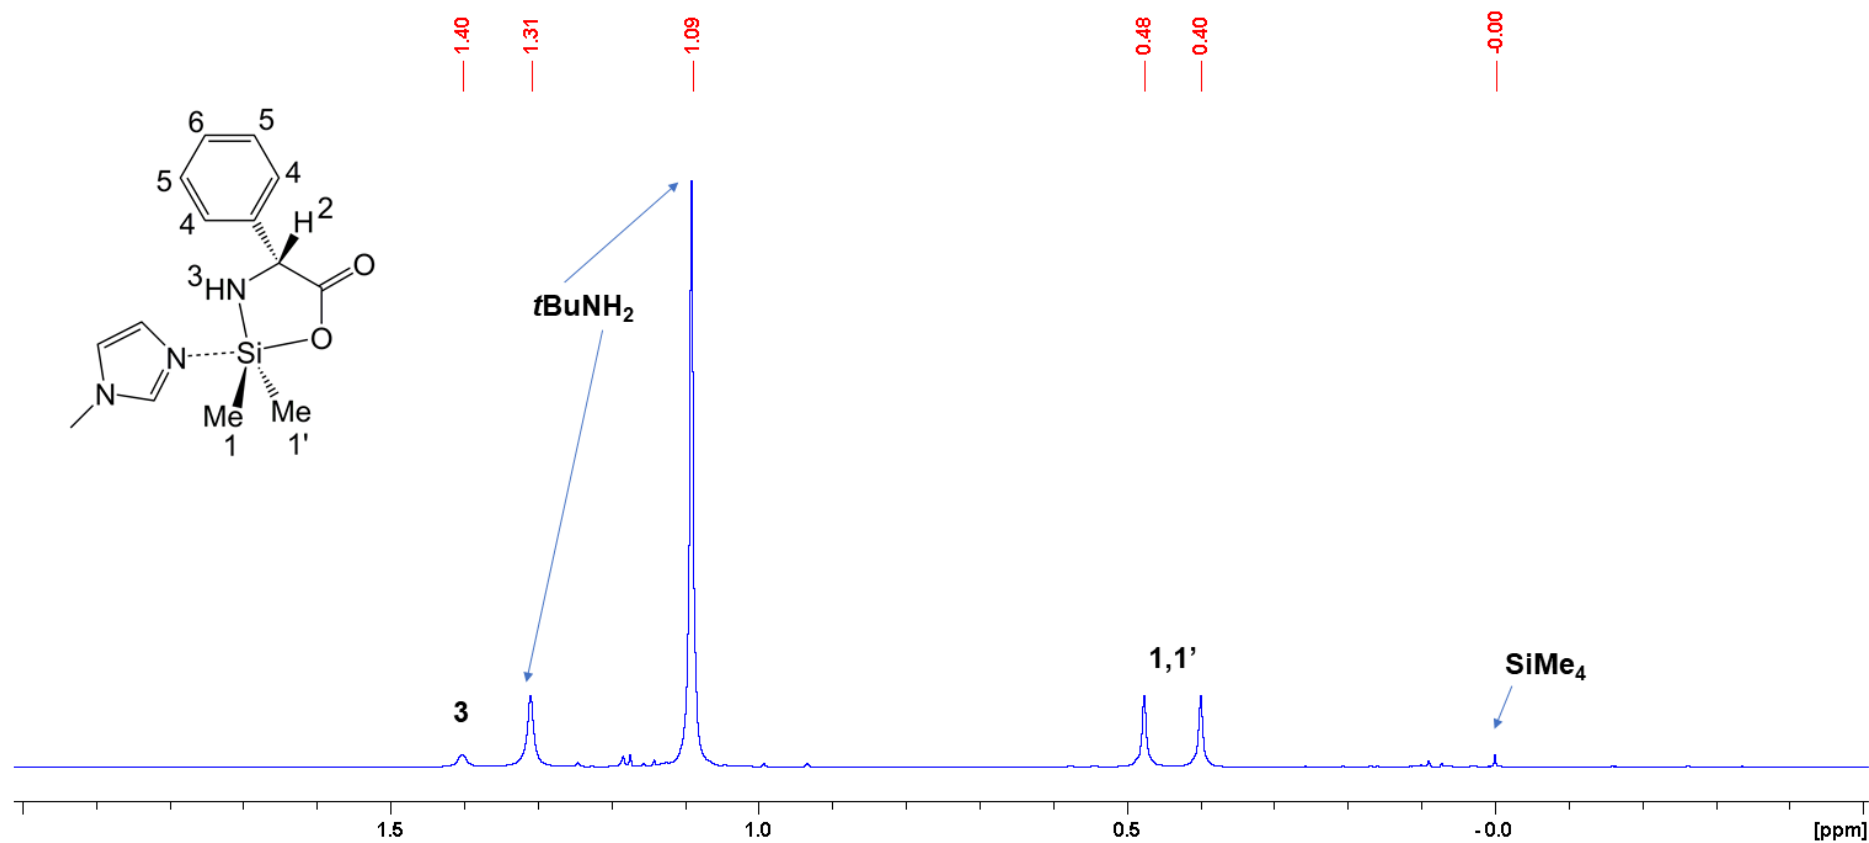

**Figure 7.** Magnified section of the  $^1\text{H}$  NMR spectrum of a solution of **(Phg)SiMe<sub>2</sub>-NMI** in  $\text{CDCl}_3$  (in the presence of excess NMI and the reaction product  $\text{tBuNH}_2$ ). According to the amounts of starting materials used, the molar ratio of **(Phg)SiMe<sub>2</sub>** : NMI :  $\text{tBuNH}_2$  should be close to 1 : 4 : 2 (cf. sample **(Phg)SiMe<sub>2</sub>-NMI-4** mentioned in the discussion).



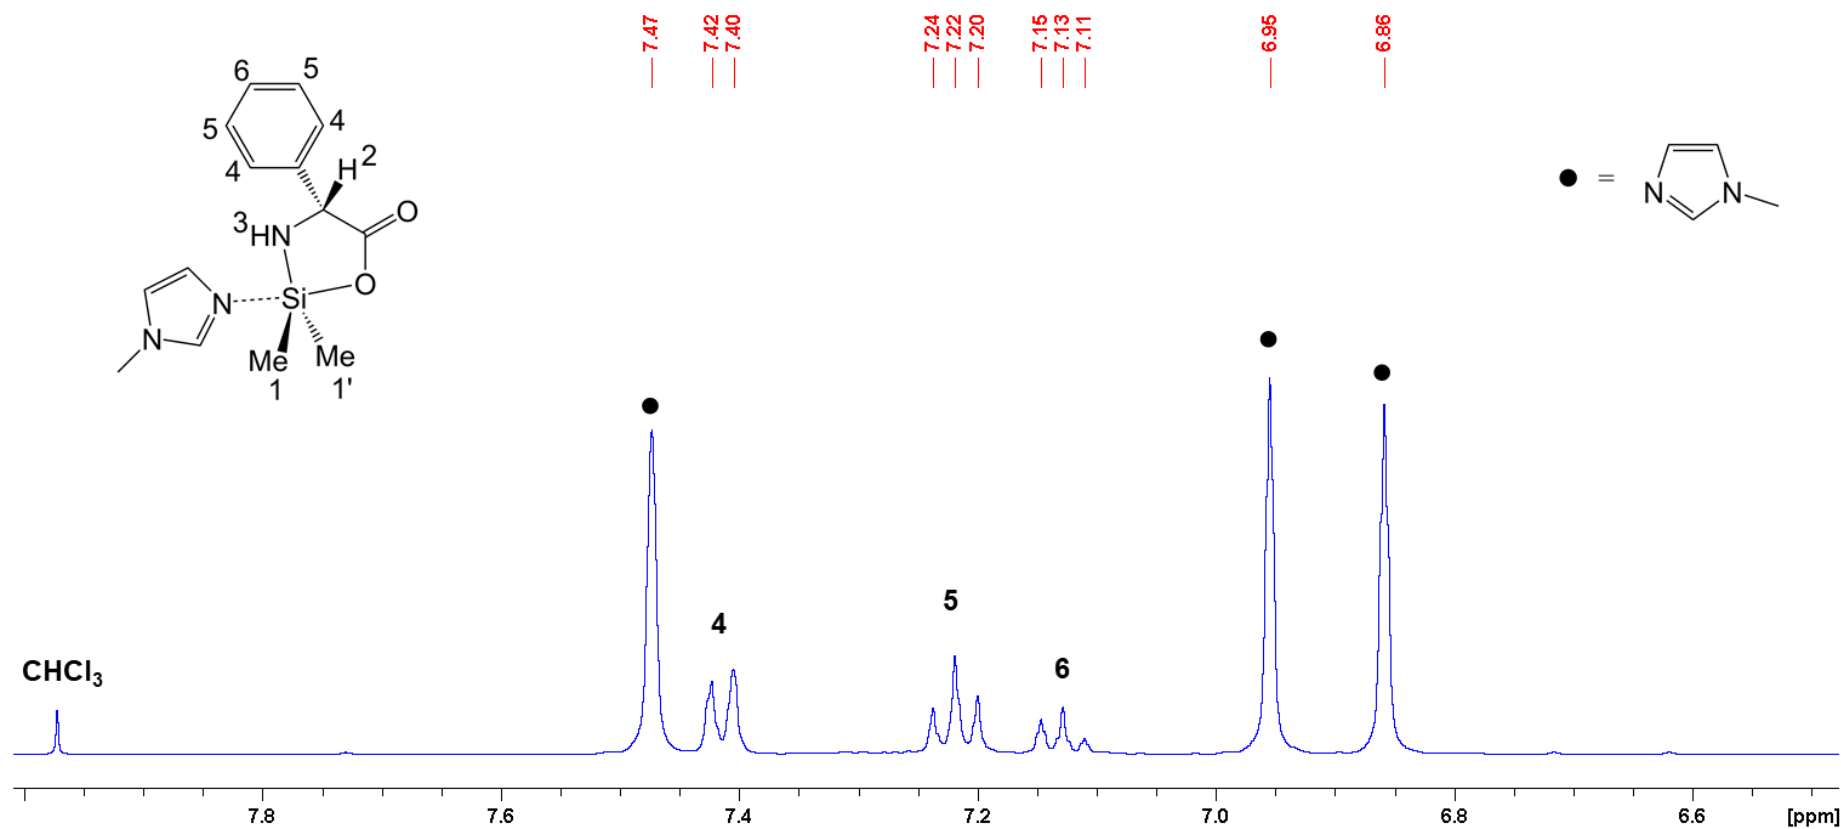

**Figure S8.** Magnified section of the <sup>1</sup>H NMR spectrum of a solution of **(Phg)SiMe<sub>2</sub>-NMI** in CDCl<sub>3</sub> (in the presence of excess NMI and the reaction product tBuNH<sub>2</sub>). According to the amounts of starting materials used, the molar ratio of **(Phg)SiMe<sub>2</sub>** : NMI : tBuNH<sub>2</sub> should be close to 1 : 4 : 2 (cf. sample **(Phg)SiMe<sub>2</sub>-NMI-4** mentioned in the discussion).

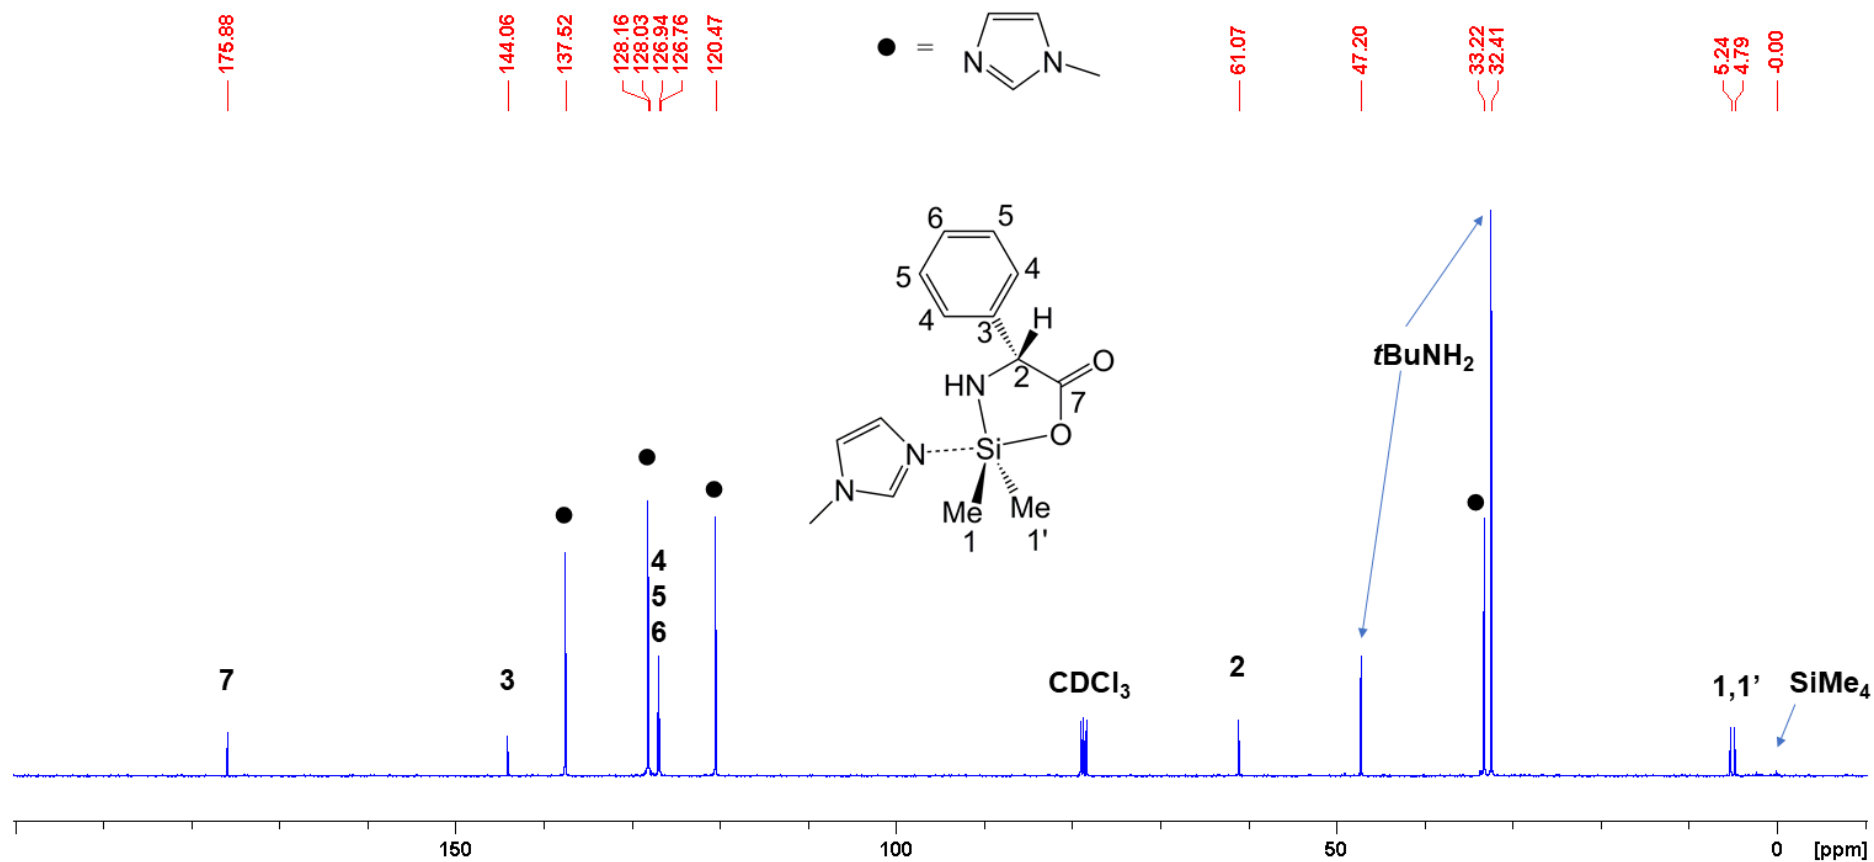

**Figure S9.** <sup>13</sup>C{<sup>1</sup>H} NMR spectrum of a solution of (Phg)SiMe<sub>2</sub>-NMI in CDCl<sub>3</sub> (in the presence of excess NMI and the reaction product tBuNH<sub>2</sub>). According to the amounts of starting materials used, the molar ratio of (Phg)SiMe<sub>2</sub> : NMI : tBuNH<sub>2</sub> should be close to 1 : 4 : 2 (cf. sample (Phg)SiMe<sub>2</sub>-NMI-4 mentioned in the discussion).

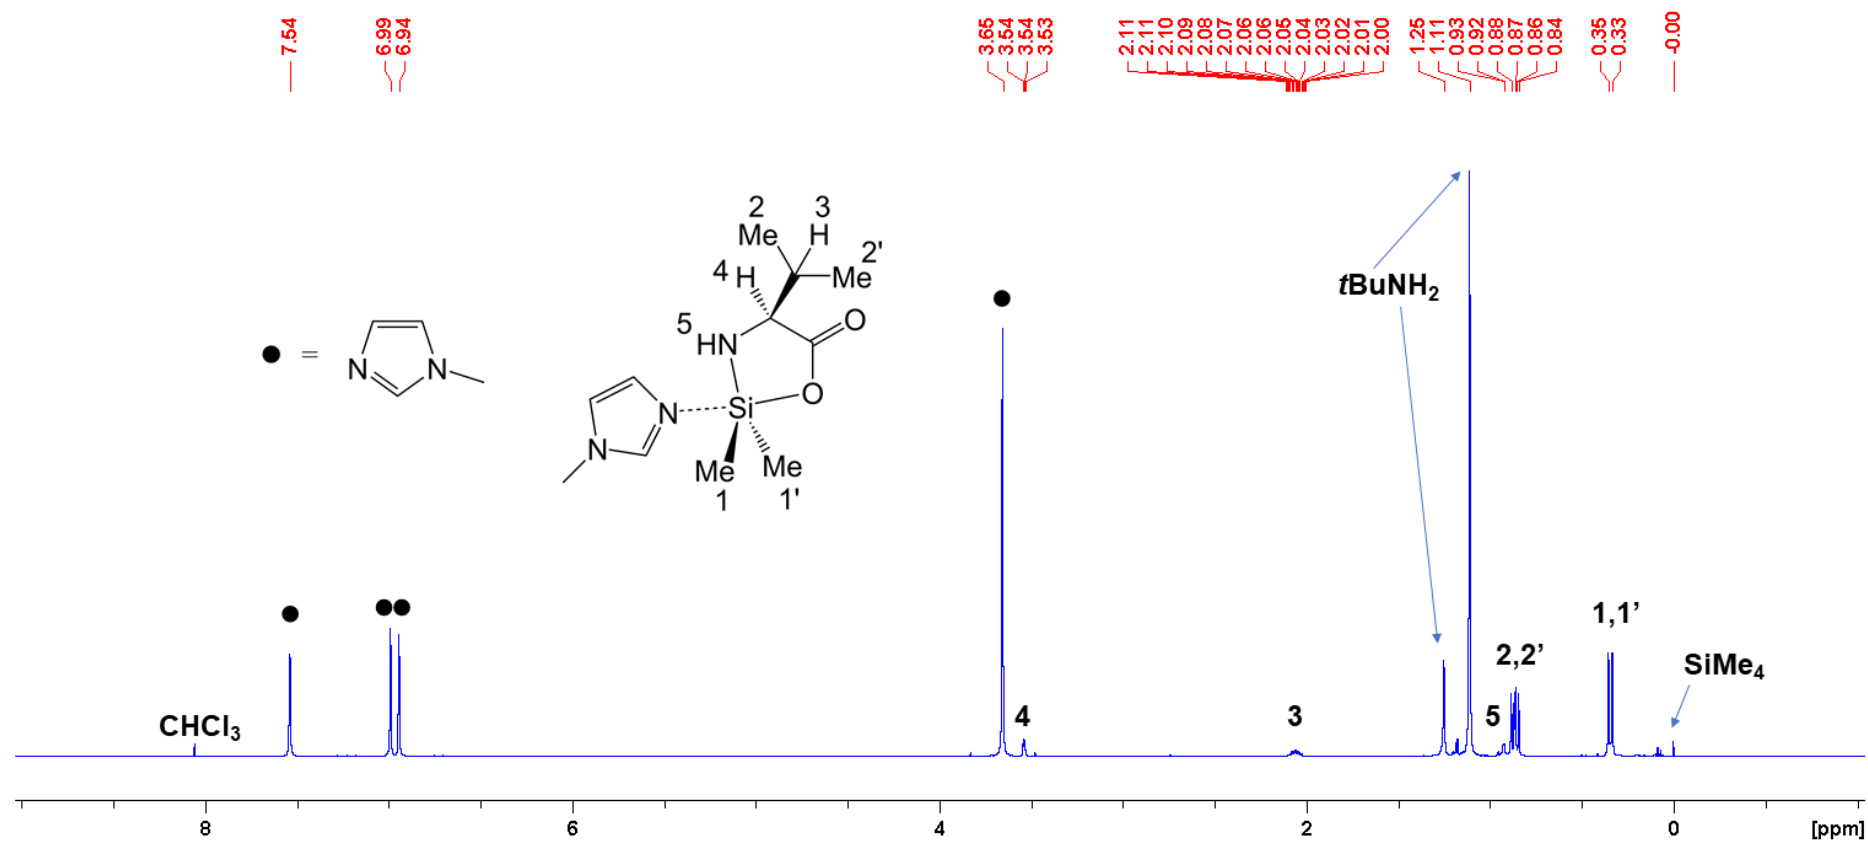

**Figure S10.**  $^1\text{H}$  NMR spectrum of a solution of (Val)SiMe<sub>2</sub>-NMI in CDCl<sub>3</sub> (in the presence of excess NMI and the reaction product tBuNH<sub>2</sub>). According to the amounts of starting materials used, the molar ratio of (Val)SiMe<sub>2</sub> : NMI : tBuNH<sub>2</sub> should be close to 1 : 4 : 2 (cf. sample (Val)SiMe<sub>2</sub>-NMI-4 mentioned in the discussion).

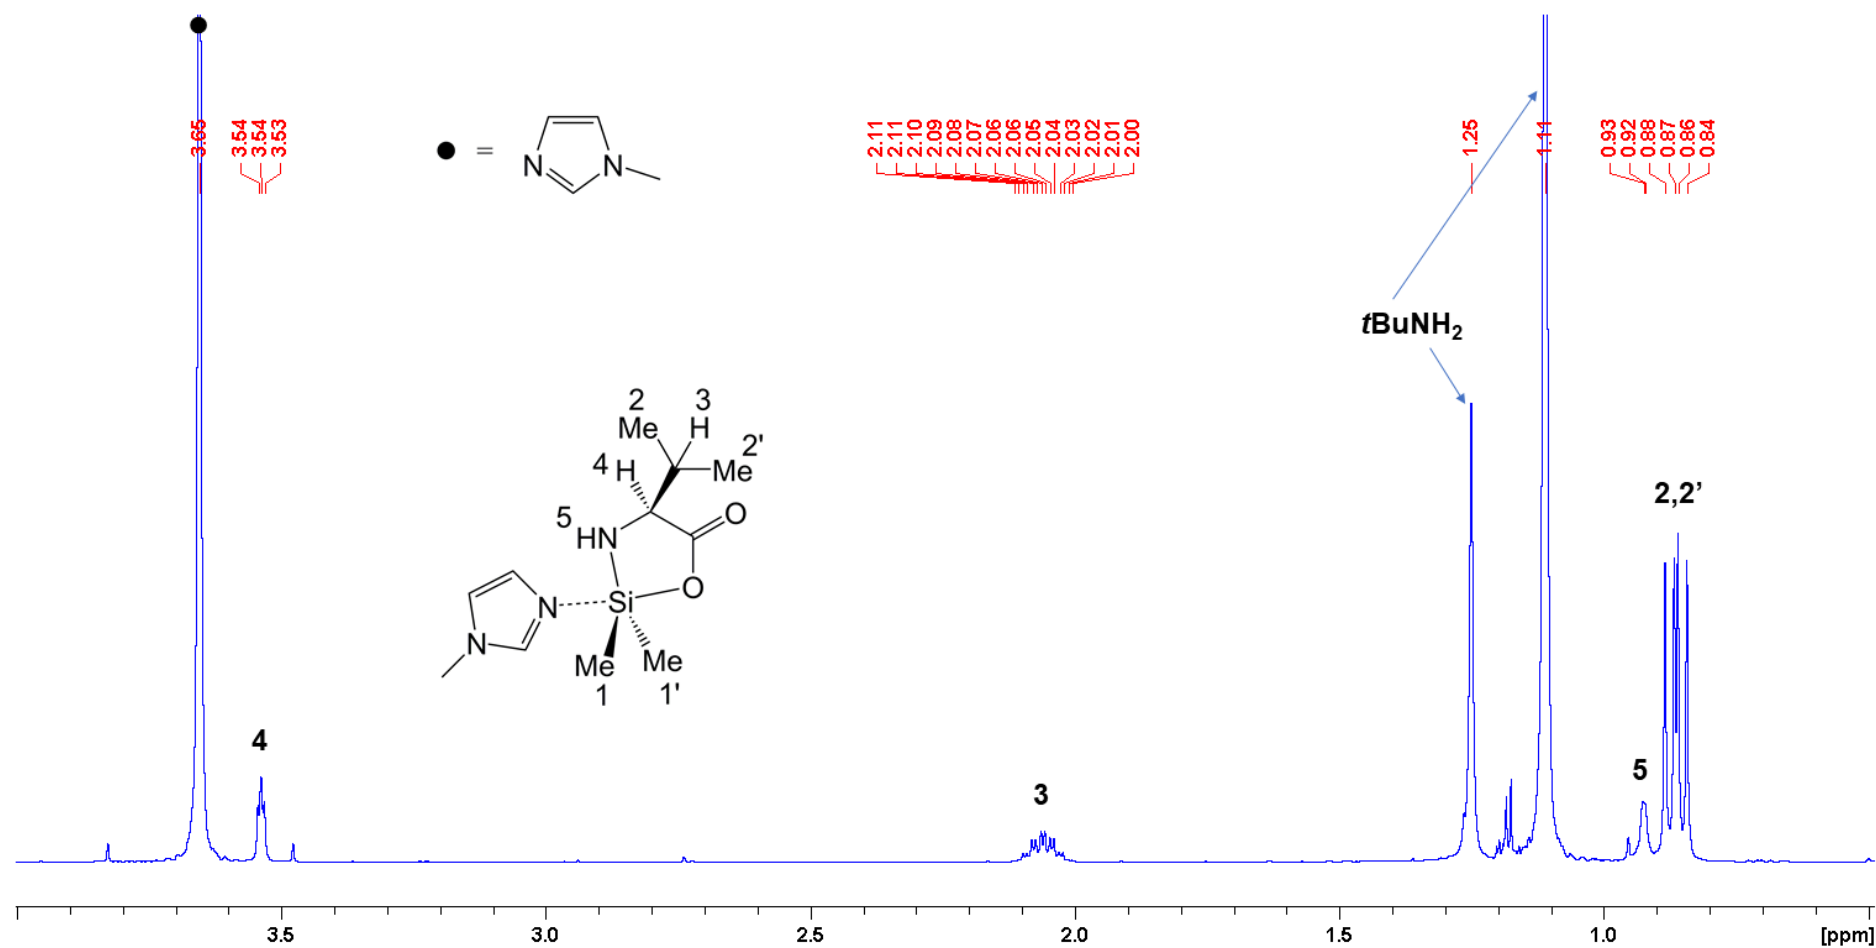

**Figure 11.** Magnified section of the  $^1\text{H}$  NMR spectrum of a solution of (Val)SiMe<sub>2</sub>-NMI in CDCl<sub>3</sub> (in the presence of excess NMI and the reaction product tBuNH<sub>2</sub>). According to the amounts of starting materials used, the molar ratio of (Val)SiMe<sub>2</sub> : NMI : tBuNH<sub>2</sub> should be close to 1 : 4 : 2 (cf. sample (Val)SiMe<sub>2</sub>-NMI-4 mentioned in the discussion).

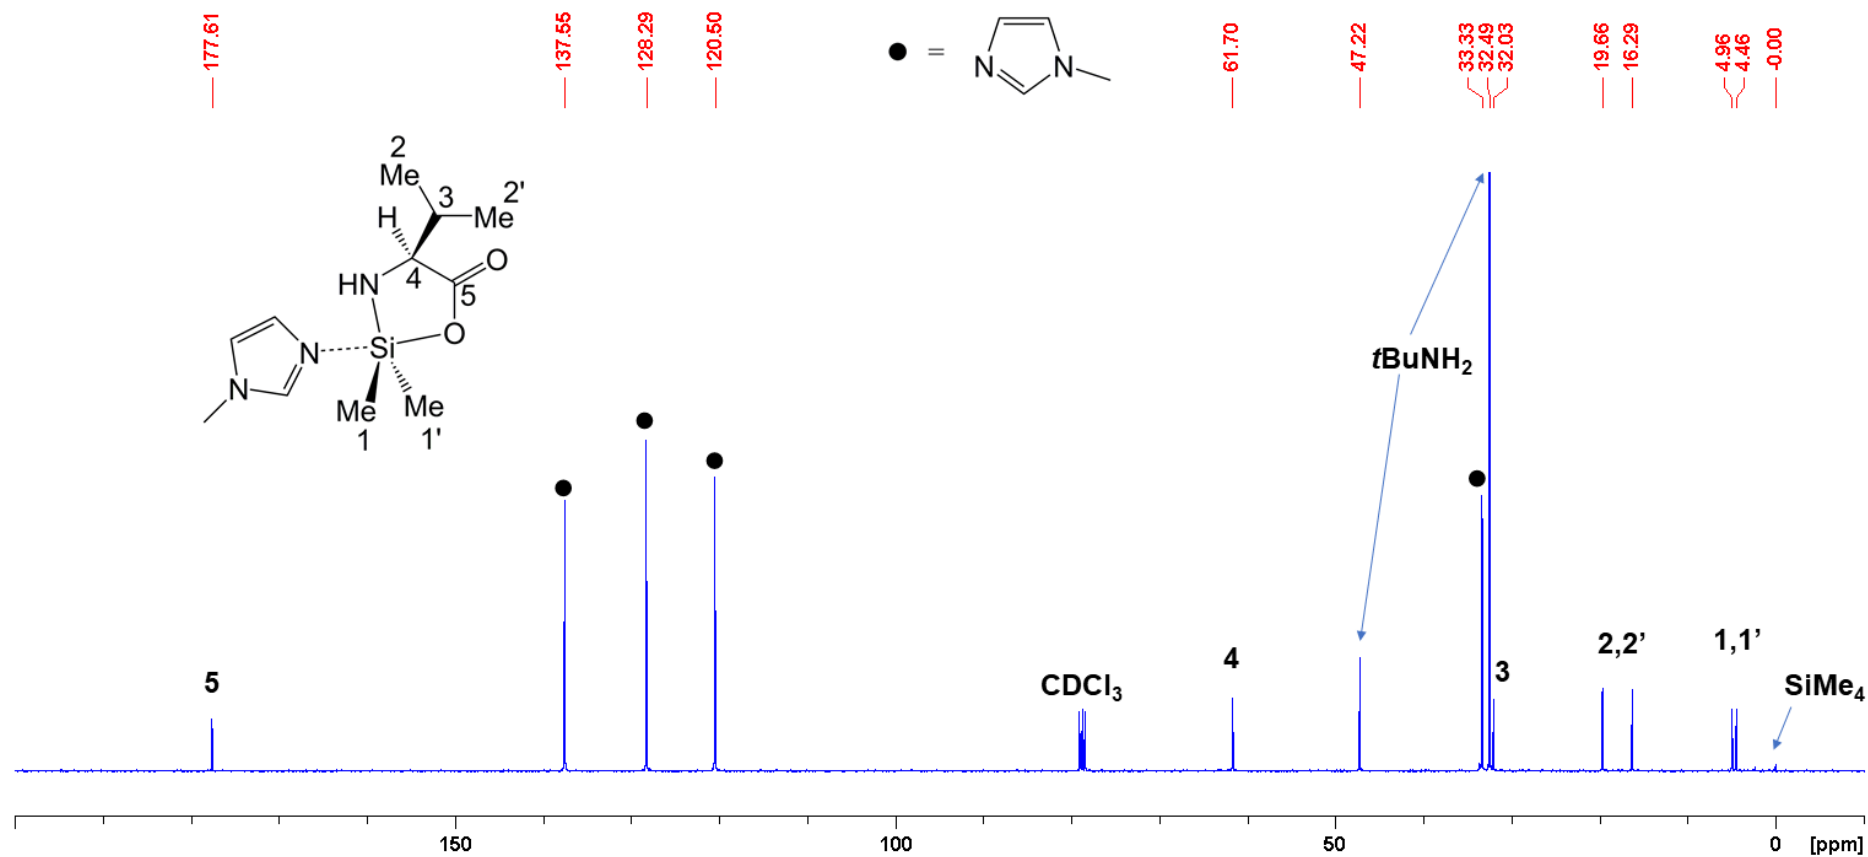

**Figure S12.**  $^{13}\text{C}\{^1\text{H}\}$  NMR spectrum of a solution of (Val)SiMe<sub>2</sub>-NMI in CDCl<sub>3</sub> (in the presence of excess NMI and the reaction product tBuNH<sub>2</sub>). According to the amounts of starting materials used, the molar ratio of (Val)SiMe<sub>2</sub> : NMI : tBuNH<sub>2</sub> should be close to 1 : 4 : 2 (cf. sample (Val)SiMe<sub>2</sub>-NMI-4 mentioned in the discussion).

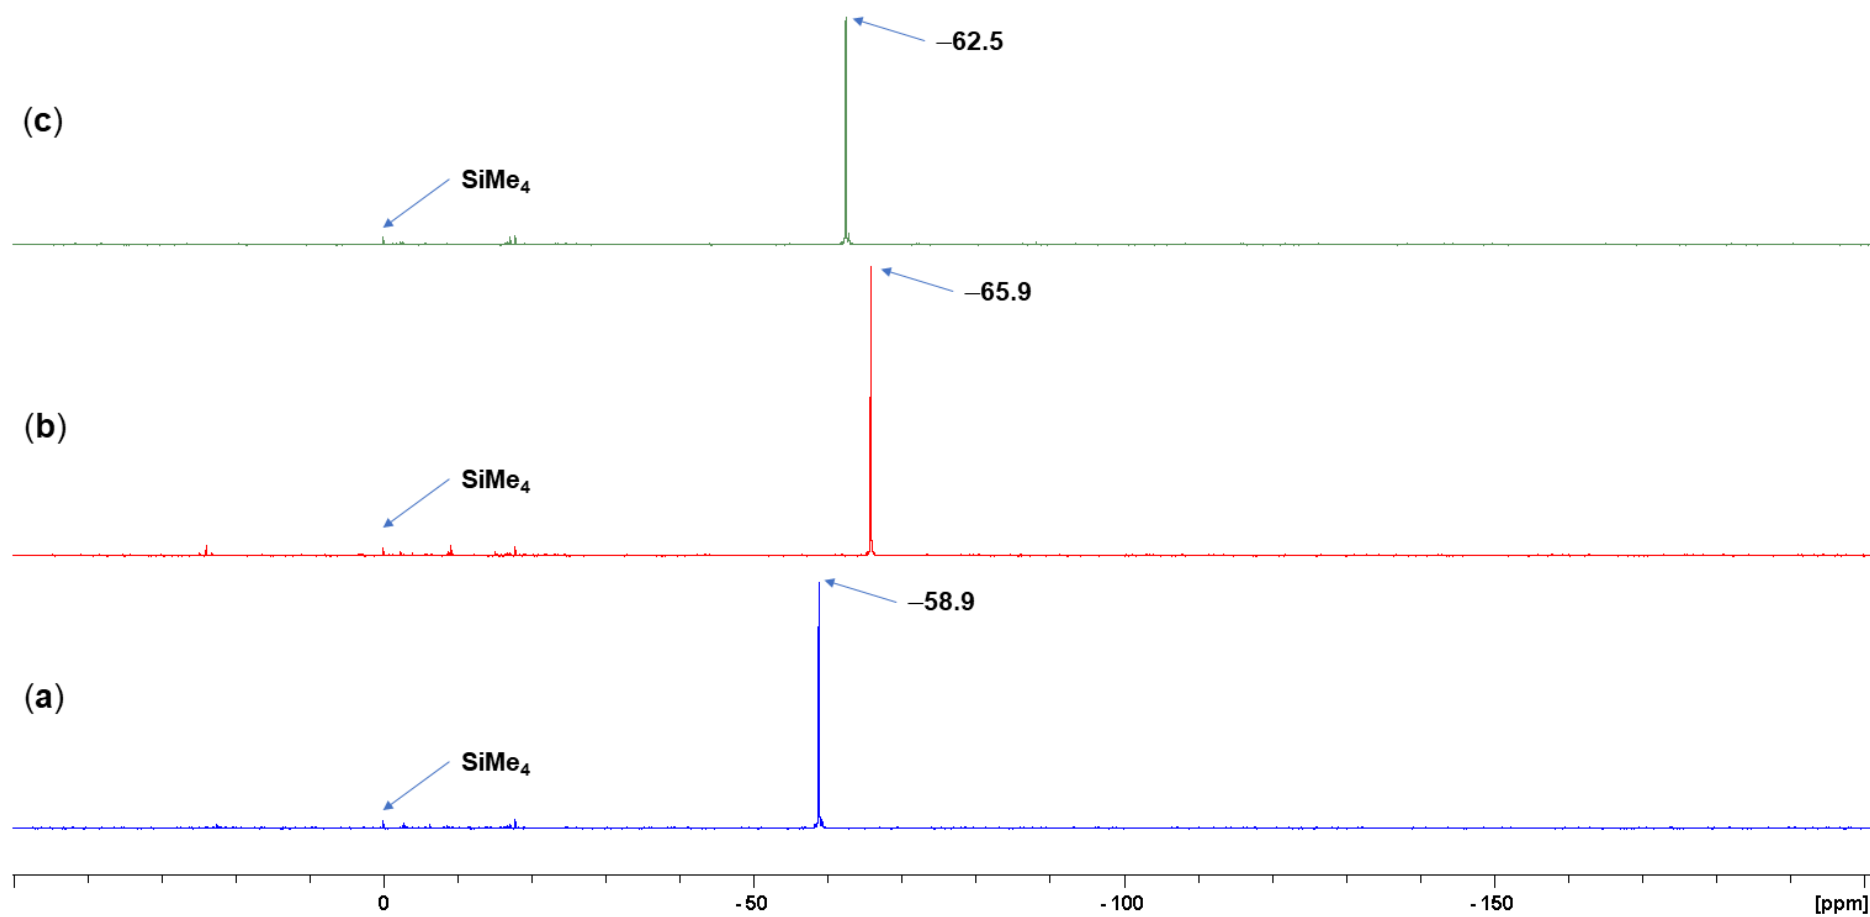

**Figure S13.**  $^{29}\text{Si}\{^1\text{H}\}$  INEPT NMR spectra of solutions of (a) **(Val)SiMe<sub>2</sub>-NMI**, (b) **(Phg)SiMe<sub>2</sub>-NMI** and (c) **(Aib)SiMe<sub>2</sub>-NMI** in  $\text{CDCl}_3$ , which were used for recording of the respective  $^1\text{H}$  and  $^{13}\text{C}\{^1\text{H}\}$  NMR spectra of Figures S3–S12.

## Atomic coordinates and total energies:

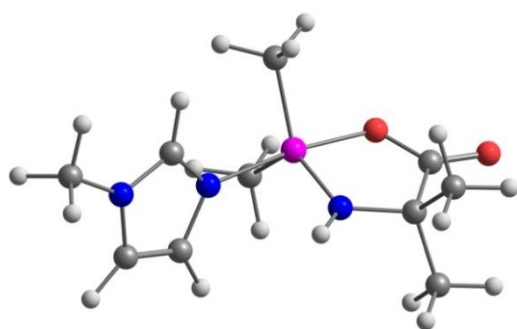

**Figure S14.**

Optimized molecular structure of (Aib)SiMe<sub>2</sub>-NMI.

PBE0:

final single point energy:

-997.773746057394 a.u.

final Gibbs free energy:

-997.52771073 a.u.

**Table S1.** Atomic coordinates for optimized structure of (Aib)SiMe<sub>2</sub>-NMI.

|    |                   |                   |                   |
|----|-------------------|-------------------|-------------------|
| Si | -0.08088191809956 | 0.07611983219258  | -0.00412147126033 |
| O  | -1.88461726478004 | 0.01238860392960  | 0.22687214978383  |
| O  | -3.49588705546657 | -0.10557332177731 | 1.75445691257877  |
| N  | 0.01708401180815  | 0.06524908436235  | 1.72069171060085  |
| H  | 0.87121270368413  | -0.00124507471485 | 2.24499597306460  |
| N  | 1.99370419779679  | 0.19185620834174  | 0.06042991046465  |
| N  | 4.12980315660641  | -0.26517339697739 | -0.03877800560774 |
| C  | -2.32022478509646 | -0.04908846581599 | 1.45137326147073  |
| C  | -1.19790873834016 | -0.04897807160289 | 2.49018552483254  |
| C  | -0.13326462735857 | 1.65400255999015  | -1.02198550517108 |
| H  | -1.05528569687053 | 1.67984426838238  | -1.60500774496786 |
| H  | 0.71396297758845  | 1.74669191473894  | -1.70253040866833 |
| H  | -0.13867622743797 | 2.52964819598012  | -0.36684668624077 |
| C  | 0.00446270120953  | -1.48249691487577 | -1.05147518056674 |
| H  | 0.28038315791284  | -2.35036948416683 | -0.44609315070070 |
| H  | 0.72180789571925  | -1.39633900540532 | -1.87004064320411 |
| H  | -0.97708026400422 | -1.68271336432836 | -1.48204584947587 |
| C  | 2.88866034415428  | -0.72855440914701 | -0.24043813208067 |
| H  | 2.67902750279461  | -1.72282195124503 | -0.59698197456575 |
| C  | 4.02414710886850  | 1.02274540785710  | 0.41767832077172  |
| H  | 4.89024111817639  | 1.61783394946308  | 0.65169263475270  |
| C  | 2.69206752901922  | 1.29557127283705  | 0.47623331625122  |
| H  | 2.19272444136276  | 2.19799686835312  | 0.78563794097747  |
| C  | 5.35842694825563  | -0.98904861821900 | -0.28158454484501 |
| H  | 5.11320770920519  | -2.00681004544607 | -0.57538959347323 |
| H  | 5.96104404567006  | -1.01345619842932 | 0.62520495083600  |
| H  | 5.92421174627695  | -0.51102109073237 | -1.08053600754287 |
| C  | -1.25621371536423 | -1.35998655013243 | 3.27386648041206  |
| H  | -2.20264766350856 | -1.45353145664536 | 3.80763201562515  |
| H  | -1.14586829959785 | -2.21305739711112 | 2.60170326709946  |
| H  | -0.44170230806822 | -1.38672577067226 | 4.00219166594491  |
| C  | -1.39064385822313 | 1.13592943863019  | 3.43461852271679  |
| H  | -2.33972697512086 | 1.05874631249559  | 3.96616547321967  |
| H  | -0.58032773089933 | 1.15422764363623  | 4.16766415629085  |
| H  | -1.37354510187290 | 2.07516562425448  | 2.87902835067707  |

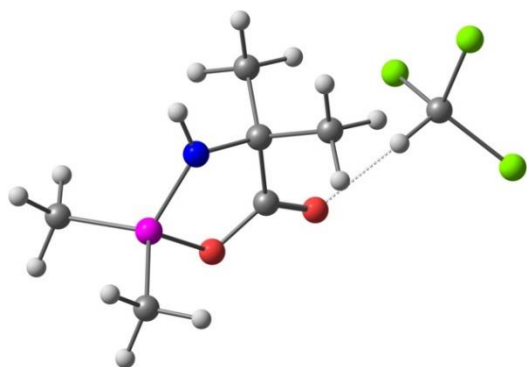

**Figure S15.**

Optimized molecular structure of (Aib)SiMe<sub>2</sub>-CHCl<sub>3</sub>.

PBE0:

final single point energy: -2157.895377070763 a.u.

final Gibbs free energy: -2157.73245359 a.u.

**Table S2.** Atomic coordinates for optimized structure of (Aib)SiMe<sub>2</sub>-CHCl<sub>3</sub>.

|    |                   |                   |                   |
|----|-------------------|-------------------|-------------------|
| Si | 0.67402391925024  | 1.43246868739297  | 0.41912531676802  |
| Cl | -4.70683790199780 | -0.72526863672304 | -3.69321493946178 |
| Cl | -4.74844736566849 | -2.75711257449864 | -1.62535794399668 |
| Cl | -6.54937506332605 | -0.48970820104895 | -1.46178132228927 |
| N  | 0.39210287803481  | -0.25072008789436 | 0.31941927077832  |
| O  | -2.81615174899915 | 0.83737997809299  | -0.68501970824328 |
| O  | -0.92070880847211 | 1.80339544668763  | -0.06088615691626 |
| C  | -4.95998377165307 | -1.04188390056140 | -1.97842932102213 |
| C  | -0.81157688708383 | -1.21831425324555 | -1.61093901677298 |
| C  | 1.86550842830787  | 2.14855109666914  | -0.80402814141209 |
| C  | -1.66355582117534 | 0.73792839082163  | -0.34824099616140 |
| C  | -0.91415014960428 | -0.59285218132844 | -0.21937678263812 |
| C  | -1.68948845904156 | -1.51120577604372 | 0.72152456708893  |
| C  | 0.95200838613595  | 2.10563037671211  | 2.11883688152634  |
| H  | -0.27936612883265 | -0.55684124805636 | -2.29649744690101 |
| H  | 1.61898851519394  | 1.82908201737830  | -1.81809061365127 |
| H  | -1.79977984670640 | -1.42961709379825 | -2.02002115010474 |
| H  | -4.20935583982744 | -0.48326704741795 | -1.42468659691207 |
| H  | -0.26093342156527 | -2.15869055564757 | -1.53982505286372 |
| H  | 1.85760497965506  | 3.24033790199781  | -0.76698233925532 |
| H  | 2.88202128334758  | 1.81565758925411  | -0.57748434870350 |
| H  | 1.07536069190403  | -0.98780011193998 | 0.30692888960348  |
| H  | -2.68221400760235 | -1.72857253828073 | 0.32720194192754  |
| H  | -1.14685888409246 | -2.45239356770014 | 0.82927681733518  |
| H  | -1.79018352610151 | -1.05560084478061 | 1.70744711404311  |
| H  | 0.92130827890206  | 3.19769913353179  | 2.11485412267980  |
| H  | 1.93314820868069  | 1.80109444387195  | 2.49247498670855  |
| H  | 0.19164620333757  | 1.73402285355525  | 2.80775760784636  |



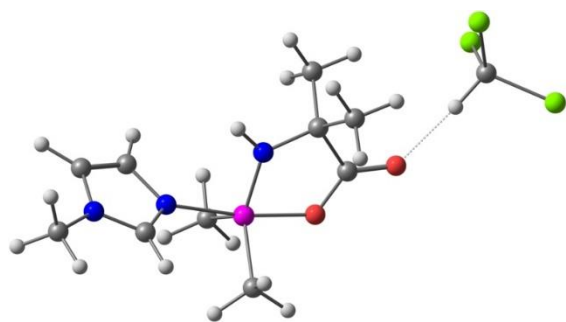

**Figure S16.**

Optimized molecular structure of (Aib)SiMe<sub>2</sub>-NMI-CHCl<sub>3</sub>.

PBE0:

final single point energy: -2423.450778006334 a.u.

final Gibbs free energy: -2423.19221366 a.u.

**Table S3.** Atomic coordinates for optimized structure of (Aib)SiMe<sub>2</sub>-NMI-CHCl<sub>3</sub>.

|    |                   |                   |                   |
|----|-------------------|-------------------|-------------------|
| Si | 0.98353944299011  | 1.19488550535240  | 0.49469278610292  |
| Cl | -4.66661822522691 | -0.46037734869722 | -3.74680639668243 |
| Cl | -4.75168154715033 | -2.46486492680743 | -1.65418545082002 |
| Cl | -6.49108465650412 | -0.15189529533525 | -1.50930114805263 |
| N  | 0.47728646264579  | -0.44669200972436 | 0.30966159342387  |
| N  | 2.81620966965163  | 0.40313022448060  | 1.00896056709474  |
| N  | 4.56214130781765  | -0.29108263407342 | 2.12523375438028  |
| O  | -2.67374873697385 | 0.79461846533642  | -0.64141509906258 |
| O  | -0.71795196869149 | 1.62905068755425  | -0.01352374187577 |
| C  | -4.91549252498172 | -0.74806146280779 | -2.02543703187901 |
| C  | -0.81253448376548 | -1.36722731160265 | -1.57639721286078 |
| C  | 1.77524526317667  | 2.18445789810807  | -0.89168294756807 |
| C  | -1.51059229418812 | 0.64733169293782  | -0.30379580574353 |
| C  | -0.84781884829862 | -0.72405250599404 | -0.18863068206690 |
| C  | 3.67989709618377  | -0.19700451745199 | 0.12971883879638  |
| C  | 4.77234379997272  | -0.63236139525645 | 0.81437182941948  |
| C  | -1.65058702153141 | -1.59435811126377 | 0.77534355255734  |
| C  | 0.88812596262793  | 2.12452907561871  | 2.12424269595953  |
| C  | 3.37678751230727  | 0.32723903889194  | 2.20030807463578  |
| C  | 5.45959145667461  | -0.54474882649821 | 3.23114584807495  |
| H  | -0.25950471715748 | -0.73796393470538 | -2.27608028744757 |
| H  | 1.79831684901284  | 1.59561187406501  | -1.81311715126486 |
| H  | -1.81931054657366 | -1.52408461658214 | -1.96498187304749 |
| H  | -4.14598144363373 | -0.20216452712120 | -1.48026364950851 |
| H  | -0.31271450687727 | -2.33696259077645 | -1.51514025200901 |
| H  | 1.17243694792603  | 3.07208555781820  | -1.09203380897880 |
| H  | 3.45771592127492  | -0.26948989474688 | -0.92147704618608 |
| H  | 2.79454635561689  | 2.49987616394838  | -0.66559307619402 |
| H  | 1.06395058215589  | -1.24868657719583 | 0.45328415066135  |
| H  | 5.66543432199285  | -1.14124154641139 | 0.49427278618471  |
| H  | -2.66272441832403 | -1.75786357353484 | 0.40452987001927  |
| H  | -1.16145766294492 | -2.56553677421094 | 0.88301414702492  |
| H  | -1.70612667415181 | -1.12575459805097 | 1.75939389610994  |
| H  | 0.08332056322114  | 2.85868744207447  | 2.08066209957174  |
| H  | 1.81607422557635  | 2.65220033311170  | 2.35395312232757  |
| H  | 0.66784176340181  | 1.44661076701503  | 2.95359334101968  |
| H  | 2.96151381342024  | 0.70113496381703  | 3.12074907550446  |
| H  | 5.61452778070860  | -1.61643589012983 | 3.34872832919084  |
| H  | 6.41701497260444  | -0.05659844903662 | 3.05365961149413  |
| H  | 5.01649820601473  | -0.14436037211502 | 4.13995269169414  |

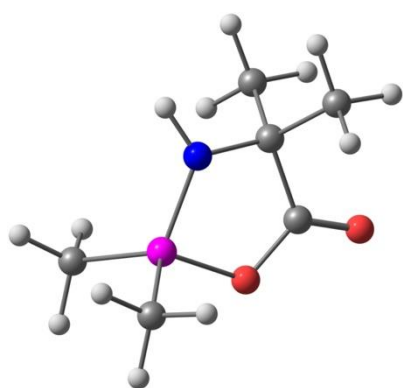

**Figure S17.**

Optimized molecular structure of **(Aib)SiMe<sub>2</sub>**.

PBE0:

final single point energy: -732.219929966298 a.u.

final Gibbs free energy: -732.06836169 a.u.

**Table S4.** Atomic coordinates for optimized structure of **(Aib)SiMe<sub>2</sub>**.

|    |                   |                   |                   |
|----|-------------------|-------------------|-------------------|
| Si | -0.52760721198535 | 0.10188343335765  | -0.07288414118817 |
| O  | -2.19324960117603 | 0.05077650850655  | 0.28097379041564  |
| O  | -3.59182203581275 | -0.03219007753494 | 2.00799763745062  |
| N  | -0.09573390454233 | 0.22655242932827  | 1.57899518574736  |
| H  | 0.81327076861360  | 0.05982047977062  | 1.97565003380268  |
| C  | -2.46714215924642 | 0.00984532439926  | 1.58848800794313  |
| C  | -1.21744376179630 | -0.00027087655824 | 2.47738690008890  |
| C  | -0.16033010815431 | 1.59230906195023  | -1.10471475799913 |
| H  | -0.61524483350519 | 1.50473102178148  | -2.09401085700435 |
| H  | 0.91927676998513  | 1.69541697302082  | -1.24352622815252 |
| H  | -0.53207386814557 | 2.49818950347393  | -0.62327452887332 |
| C  | -0.03853647373421 | -1.45917445405629 | -0.94340929421673 |
| H  | -0.36105303309540 | -2.33537989508837 | -0.37809701352165 |
| H  | 1.04895804849952  | -1.50253925721556 | -1.04950097391290 |
| H  | -0.47220089139349 | -1.50707228631919 | -1.94487562666388 |
| C  | -1.14250574445484 | -1.36794500978644 | 3.15892033644616  |
| H  | -2.01230386166623 | -1.53022177366452 | 3.79628355925328  |
| H  | -1.09274311199359 | -2.16951976380484 | 2.41971935542999  |
| H  | -0.24355315163388 | -1.41198919004326 | 3.77761419559298  |
| C  | -1.33890433100993 | 1.10493690999584  | 3.52091988226694  |
| H  | -2.22320337296390 | 0.95328667852647  | 4.14018632056514  |
| H  | -0.45564548082371 | 1.09498177999128  | 4.16282618154244  |
| H  | -1.40579764996481 | 2.08148347996924  | 3.03963003498736  |

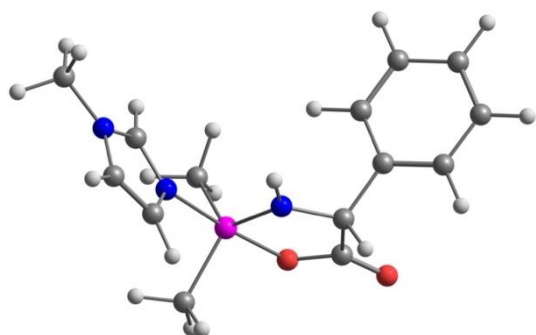

**Figure S18.**

Optimized molecular structure of **(Phg)SiMe<sub>2</sub>-NMI**.

PBE0:

final single point energy: -1150.180944442688 a.u.

final Gibbs free energy: -1149.91101818 a.u.

**Table S5.** Atomic coordinates for optimized structure of **(Phg)SiMe<sub>2</sub>-NMI**.

|    |                   |                   |                   |
|----|-------------------|-------------------|-------------------|
| Si | -0.11780309862611 | 0.08530725205908  | -0.08541467643146 |
| O  | -1.93342766521586 | 0.03720037800469  | 0.08883585926668  |
| O  | -3.59619094703078 | 0.02622151422284  | 1.56992528807897  |
| N  | -0.07937774216563 | 0.04616623395979  | 1.64560693822524  |
| H  | 0.75616563091277  | -0.02980069564907 | 2.19679007591769  |
| N  | 1.94235215951655  | 0.17794288691295  | 0.05319036205647  |
| N  | 4.07373107917648  | -0.30744165671048 | 0.04776156953300  |
| C  | -2.41487367855310 | 0.00704653768553  | 1.29500511227795  |
| C  | -1.31630001063343 | -0.05179108707142 | 2.36211257068928  |
| H  | -1.49196437244629 | 0.80940214485651  | 3.02000115866481  |
| C  | -1.47199885693237 | -1.30348525431390 | 3.19743202352353  |
| C  | -2.13660792802807 | -1.25340727766549 | 4.41723089131874  |
| H  | -2.51779289018274 | -0.3033222232067  | 4.77498293246527  |
| C  | -2.31414604895977 | -2.40231032458517 | 5.17482211248179  |
| H  | -2.83180567562991 | -2.34622685090620 | 6.12521629299773  |
| C  | -1.82710859328844 | -3.61881456906773 | 4.71827034470371  |
| H  | -1.96312021020806 | -4.51698168756826 | 5.30875856529084  |
| C  | -1.16121656835888 | -3.67650654859363 | 3.50091126537598  |
| H  | -0.77924101752148 | -4.62307171425105 | 3.13645705515509  |
| C  | -0.98429965940164 | -2.52594734466838 | 2.74743025269313  |
| H  | -0.46040795425220 | -2.57043348507986 | 1.80005923439633  |
| C  | -0.13070301837810 | 1.68230772493727  | -1.07270540340651 |
| H  | -1.02874459733476 | 1.71898418660340  | -1.69129247076648 |
| H  | 0.74266527488544  | 1.78696626705951  | -1.71754498241065 |
| H  | -0.16290363170527 | 2.54625475772541  | -0.40307149922970 |
| C  | -0.01505918159599 | -1.45521376517561 | -1.15631720182972 |
| H  | 0.27198285842405  | -2.33311822450395 | -0.57099148025485 |
| H  | 0.70598898490653  | -1.34098291822310 | -1.96847508919067 |
| H  | -0.99121568747454 | -1.66066609822298 | -1.59592930620504 |
| C  | 2.83761766403419  | -0.75385303135587 | -0.21146885443068 |
| H  | 2.63120631763494  | -1.74350139560303 | -0.58227968847848 |
| C  | 3.96486804969485  | 0.97973103358995  | 0.50569247915942  |
| H  | 4.82744526080997  | 1.56145564064126  | 0.78225307659949  |
| C  | 2.63573690689396  | 1.27068852432332  | 0.50567777420703  |
| H  | 2.13520558813490  | 2.17865550698960  | 0.79608561912645  |
| C  | 5.30269707695436  | -1.04858095105909 | -0.13458896825709 |
| H  | 5.05989635737049  | -2.04923052990700 | -0.48373814002072 |
| H  | 5.83885652335881  | -1.11889964982495 | 0.81080264572004  |
| H  | 5.93204351321511  | -0.55328415224418 | -0.87293015401269 |

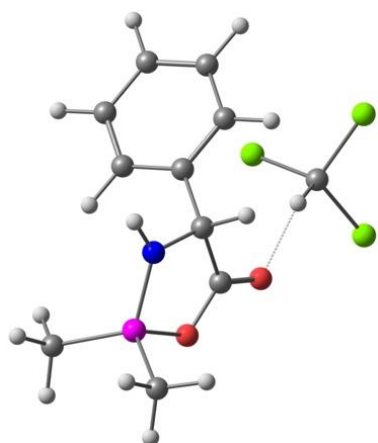

**Figure S19.**

Optimized molecular structure of **(Phg)SiMe<sub>2</sub>-CHCl<sub>3</sub>**.

PBE0:

final single point energy: -2310.302242593934 a.u.

final Gibbs free energy: -2310.11540654 a.u.

**Table S6.** Atomic coordinates for optimized structure of **(Phg)SiMe<sub>2</sub>-CHCl<sub>3</sub>**.

|    |                   |                   |                   |
|----|-------------------|-------------------|-------------------|
| Si | -0.06153048826142 | 0.00430074443648  | 0.90079875169606  |
| O  | -1.74059123778789 | 0.10911786699109  | 0.60640992264242  |
| O  | -3.68810054924268 | 0.23380430378844  | 1.66870796012612  |
| N  | -0.29271144343930 | -0.05831043205226 | 2.59424568447582  |
| H  | 0.38569837291957  | -0.18019126060188 | 3.32422761087725  |
| C  | -2.49104530562024 | 0.12734003062188  | 1.70447378873794  |
| C  | -1.67469854835704 | 0.01359979492736  | 2.99725279940526  |
| H  | -1.89889475568148 | 0.92990959419399  | 3.55899839222151  |
| C  | -2.15416565065070 | -1.15863126367144 | 3.82446980329732  |
| C  | -2.96040716980403 | -0.94321745571281 | 4.93422452725196  |
| H  | -3.23627498465587 | 0.07012409537979  | 5.20469105465749  |
| C  | -3.40937925314374 | -2.01245494575060 | 5.69685809870731  |
| H  | -4.03957671971907 | -1.83125802444174 | 6.55905030788691  |
| C  | -3.05385119494279 | -3.30726484633578 | 5.35292263526291  |
| H  | -3.40247234685458 | -4.14338922171033 | 5.94703374356691  |
| C  | -2.25042088382906 | -3.52907355756943 | 4.24165990670599  |
| H  | -1.97250472025246 | -4.53949885180459 | 3.96602895539919  |
| C  | -1.80173326625647 | -2.46007126904275 | 3.48264791346683  |
| H  | -1.16322583335545 | -2.63364265440066 | 2.62429945002330  |
| C  | 0.76994531149520  | 1.52391218149950  | 0.25437164537842  |
| H  | 0.71844615612025  | 1.56497478449529  | -0.83604994576241 |
| H  | 1.82611046297974  | 1.52006075932242  | 0.53745987223234  |
| H  | 0.30902766134052  | 2.42443401213570  | 0.66343478288512  |
| C  | 0.61108027700430  | -1.52278179618629 | 0.10426035137288  |
| H  | 0.04297644193039  | -2.40607412858274 | 0.40017792238937  |
| H  | 1.65310397286513  | -1.66963524109619 | 0.40131116989158  |
| H  | 0.58520544307982  | -1.43720660883641 | -0.98446052205509 |
| C  | -6.23235273177041 | -0.75257306747403 | 3.21004144255887  |
| Cl | -6.17409870490739 | -2.51095254699368 | 3.16061211678655  |
| Cl | -6.63866804347384 | -0.18169699080148 | 4.82838829970487  |
| Cl | -7.38213886353841 | -0.13153126579464 | 2.02865722710390  |
| H  | -5.24937184019052 | -0.37399395993219 | 2.94562660010503  |

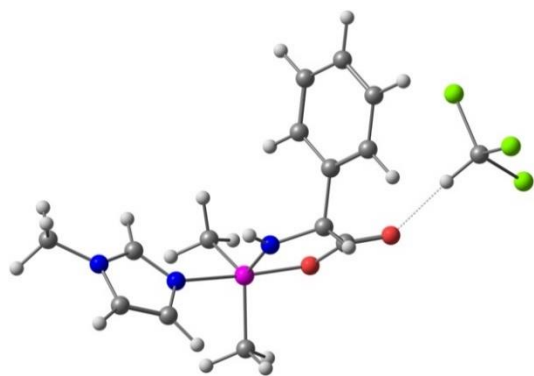

**Figure S20.**

Optimized molecular structure of **(Phg)SiMe<sub>2</sub>-NMI-CHCl<sub>3</sub>**.

PBE0:

final single point energy:

-2575.859356730710 a.u.

final Gibbs free energy:

-2575.57620347 a.u.

**Table S7.** Atomic coordinates for optimized structure of **(Phg)SiMe<sub>2</sub>-NMI-CHCl<sub>3</sub>**.

|    |                   |                   |                   |
|----|-------------------|-------------------|-------------------|
| Si | 0.27019762717249  | -0.01252411353404 | 1.14626598947882  |
| O  | -1.51876566765400 | 0.08437606029104  | 0.74830085123799  |
| O  | -3.55229488700673 | 0.22352698003043  | 1.63359810954884  |
| N  | -0.24161833855949 | -0.01895976368684 | 2.80012255187193  |
| H  | 0.37063666293796  | -0.13131620075968 | 3.58733383888552  |
| N  | 2.17062906416346  | -0.10312568093976 | 1.92327210778348  |
| N  | 4.07550076019966  | -0.83790555392475 | 2.70233472394201  |
| C  | -2.34399812858076 | 0.11901990054611  | 1.74361837408358  |
| C  | -1.64312308612882 | 0.02682772753845  | 3.09891304107208  |
| H  | -1.92750026063116 | 0.93660332905942  | 3.64489531029288  |
| C  | -2.15119850297110 | -1.15632222888113 | 3.89173589710068  |
| C  | -2.96552607834098 | -0.96518457272663 | 5.00001649707521  |
| H  | -3.23755264434601 | 0.04327798933250  | 5.29182167987423  |
| C  | -3.43040063157852 | -2.04918083745185 | 5.73309053743761  |
| H  | -4.06663417731460 | -1.88369800099189 | 6.59437732213733  |
| C  | -3.08453644416753 | -3.33820374952150 | 5.36028551855513  |
| H  | -3.44653514460171 | -4.18594620594313 | 5.92969245847033  |
| C  | -2.27555697835903 | -3.53835272077170 | 4.24796554280280  |
| H  | -2.00867997080832 | -4.54446362469778 | 3.94595545608476  |
| C  | -1.81080269552470 | -2.45437567928576 | 3.52123150721442  |
| H  | -1.17289460214964 | -2.61085793107649 | 2.65882800091951  |
| C  | 0.69055581737529  | 1.56110548906052  | 0.21517811782027  |
| H  | 0.02770703649614  | 1.66132621868136  | -0.64561325338404 |
| H  | 1.72335720471756  | 1.57792750815396  | -0.13554579536426 |
| H  | 0.53376170778233  | 2.43835241082556  | 0.84904831813967  |
| C  | 0.55415636624916  | -1.57176913100163 | 0.14016166066205  |
| H  | 0.47248922240517  | -2.46791562166696 | 0.76172073363974  |
| H  | 1.53448618985273  | -1.58084316977920 | -0.34000652075157 |
| H  | -0.20611801325707 | -1.64647414848240 | -0.63799804884786 |
| C  | 2.95145960437954  | -1.15904057389131 | 2.04985306234799  |
| H  | 2.73657146897348  | -2.15195462263866 | 1.69221708113156  |
| C  | 4.01185843532725  | 0.49563287845230  | 3.01275609905199  |
| H  | 4.80601553868057  | 0.99646623397720  | 3.53959137238561  |
| C  | 2.82256582306910  | 0.94197537741068  | 2.52528347600678  |
| H  | 2.39493226211822  | 1.92921737128741  | 2.56517245147807  |
| C  | 5.16342228889016  | -1.73795055319833 | 3.01760739776837  |
| H  | 4.91075016325864  | -2.73220348934240 | 2.65701784211861  |
| H  | 5.31516719098396  | -1.77477122911424 | 4.09551997607109  |
| H  | 6.07913505840074  | -1.40145811678537 | 2.53317042163310  |
| C  | -6.12666546327027 | -0.71739694708499 | 3.00059358731731  |
| Cl | -6.07033981467884 | -2.47742652780094 | 2.98747398950201  |
| Cl | -6.57393833783845 | -0.11729160594645 | 4.59802636865817  |
| Cl | -7.25419195704927 | -0.12015260627372 | 1.78419188071026  |
| H  | -5.13509644361651 | -0.34555944644734 | 2.74755274603574  |

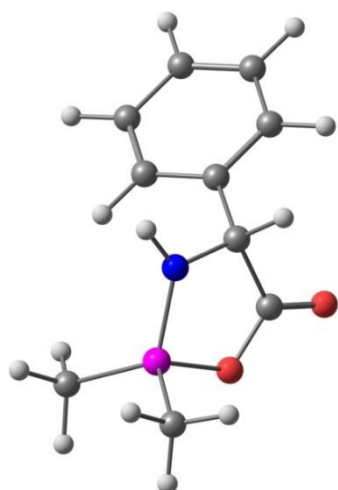

**Figure S21.**  
Optimized molecular structure of **(Phg)SiMe<sub>2</sub>**.

PBE0:  
final single point energy: -884.625592931935 a.u.  
final Gibbs free energy: -884.45129273 a.u.

**Table S8.** Atomic coordinates for optimized structure of **(Phg)SiMe<sub>2</sub>**.

|    |                   |                   |                   |
|----|-------------------|-------------------|-------------------|
| Si | -0.56850420369631 | 0.06810583773782  | -0.18136754831563 |
| O  | -2.24451117740762 | 0.07644160947686  | 0.12680069482636  |
| O  | -3.69971388432200 | 0.11400268968165  | 1.81096421210122  |
| N  | -0.18726113822819 | 0.01271471960995  | 1.48589340587954  |
| H  | 0.71067227521875  | -0.07232077922077 | 1.92721629334110  |
| C  | -2.56730128290013 | 0.05291620149795  | 1.42204237017107  |
| C  | -1.34247898025238 | -0.05552252048760 | 2.34247049316374  |
| H  | -1.41153100944736 | 0.80731019839681  | 3.01665057700977  |
| C  | -1.45074916009789 | -1.30867247298132 | 3.18686767803462  |
| C  | -2.11522110542741 | -1.26131963903548 | 4.40719376808755  |
| H  | -2.52544044088140 | -0.31967793850067 | 4.75456024922453  |
| C  | -2.25534677663182 | -2.40595567181646 | 5.17713317094844  |
| H  | -2.77336712687086 | -2.35534242823907 | 6.12750840473802  |
| C  | -1.72850009062539 | -3.61151031902179 | 4.73424071577396  |
| H  | -1.83388699646518 | -4.50585695984932 | 5.33660043752737  |
| C  | -1.06049329361349 | -3.66320076947857 | 3.51896149767483  |
| H  | -0.64374727054433 | -4.59991971944790 | 3.16794032755018  |
| C  | -0.92237547795882 | -2.51704025261536 | 2.74936945789880  |
| H  | -0.39301099987936 | -2.55720928560637 | 1.80518768571862  |
| C  | -0.09074436735959 | 1.62686370894047  | -1.05478772666676 |
| H  | -0.48594435267834 | 1.64622113338121  | -2.07286673483967 |
| H  | 0.99857883401249  | 1.69768954847958  | -1.11930281214654 |
| H  | -0.45882030854031 | 2.50128900201644  | -0.51568025224245 |
| C  | -0.12548780222656 | -1.42778592206764 | -1.17748400564475 |
| H  | -0.51578209421618 | -2.33598037307651 | -0.71519600236838 |
| H  | 0.96181471312514  | -1.51899299551587 | -1.24955448016840 |
| H  | -0.52035548208542 | -1.35346960225801 | -2.19325487727721 |

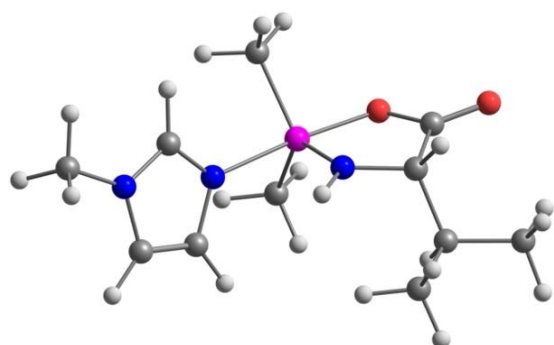

**Figure S22.**

Optimized molecular structure of **(Val)SiMe<sub>2</sub>-NMI**.

PBE0:

final single point energy: -1037.076892263604

a.u.

final Gibbs free energy: -1036.80219215 a.u.

**Table S9.** Atomic coordinates for optimized structure of **(Val)SiMe<sub>2</sub>-NMI**.

|    |                   |                   |                   |
|----|-------------------|-------------------|-------------------|
| Si | -0.10223496991522 | 0.03519972255288  | 0.00203759499821  |
| O  | -1.89192533905592 | -0.12859903248130 | 0.25837412852743  |
| O  | -3.44980381914456 | -0.54596735927377 | 1.78513788684621  |
| N  | 0.03678546038735  | -0.21671248664894 | 1.70909806019828  |
| H  | 0.89985633699227  | -0.15027983939442 | 2.21510852374449  |
| N  | 1.96924559966106  | 0.18351362010411  | 0.04580685360226  |
| N  | 4.10019319312621  | -0.30394899040718 | 0.00985446999995  |
| C  | -2.29658957965627 | -0.30769199061642 | 1.48487162193183  |
| C  | -1.16608813637387 | -0.17328552830688 | 2.49727049566405  |
| C  | -0.21678001658310 | 1.73200253767771  | -0.79750772085766 |
| H  | -1.15886761108363 | 1.80968869171892  | -1.34315362842147 |
| H  | 0.60331472818324  | 1.93310492723495  | -1.48836884506165 |
| H  | -0.21849350300559 | 2.51799112044589  | -0.03676968944946 |
| C  | -0.00089809630581 | -1.36892365869200 | -1.24069858015139 |
| H  | 0.24944721579895  | -2.31215814384542 | -0.74657241405997 |
| H  | 0.73932691403968  | -1.18605594567584 | -2.02202227073633 |
| H  | -0.97336149889208 | -1.50062356614492 | -1.71663947812834 |
| C  | 2.85957070232085  | -0.74842174705139 | -0.23193226897248 |
| H  | 2.64506602465507  | -1.73842651690863 | -0.59833482930531 |
| C  | 3.99888165215937  | 0.98304473327523  | 0.47036565948349  |
| H  | 4.86645581097768  | 1.56391636541537  | 0.73351661978005  |
| C  | 2.66956654286455  | 1.27434416363115  | 0.49059524815439  |
| H  | 2.17389937105141  | 2.18195050376774  | 0.79113143349954  |
| C  | 5.32545822016247  | -1.04310402792788 | -0.20188232339778 |
| H  | 5.07472541213307  | -2.05871400932355 | -0.49894672775287 |
| H  | 5.90512738710783  | -1.07233868433145 | 0.71968044329593  |
| H  | 5.91620882013584  | -0.57392303411326 | -0.98804252631324 |
| H  | -1.23634925348116 | -1.02654916586000 | 3.18608749874873  |
| C  | -1.31832581622118 | 1.11603046127290  | 3.33622948883599  |
| H  | -1.43225697593932 | 1.94753287782358  | 2.62912709086151  |
| C  | -0.06579628888987 | 1.36636403428857  | 4.16367454266202  |
| C  | -2.53725027139359 | 1.07146141307256  | 4.24429172518883  |
| H  | -3.45647961479115 | 0.91833494293803  | 3.68187139820814  |
| H  | -2.44670390165036 | 0.25351897258914  | 4.96575555620559  |
| H  | -2.62189238809417 | 2.00309774871125  | 4.80842477030267  |
| H  | 0.12263277758093  | 0.52772236174953  | 4.84153542760319  |
| H  | -0.18851715470909 | 2.26407218657651  | 4.77348804893198  |
| H  | 0.81972506584809  | 1.50993601115719  | 3.54222673133318  |



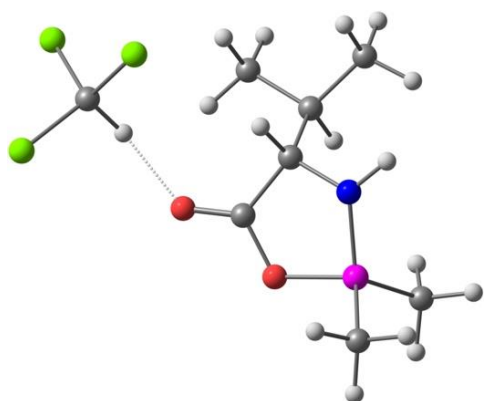

**Figure S23.**

Optimized molecular structure of (Val)SiMe<sub>2</sub>-CHCl<sub>3</sub>.

PBE0:

final single point energy:

-2197.198991781118 a.u.

final Gibbs free energy:

-2197.00676859 a.u.

**Table S10.** Atomic coordinates for optimized structure of (Val)SiMe<sub>2</sub>-CHCl<sub>3</sub>.

|    |                   |                   |                  |
|----|-------------------|-------------------|------------------|
| Si | 1.61991810378187  | -1.84944534730634 | 2.85628773314127 |
| O  | 1.38717926349945  | -2.84085943984397 | 4.22616380960548 |
| O  | -0.08462606623560 | -3.23268853718643 | 5.83785974211204 |
| N  | 0.06419265121399  | -1.15190422450547 | 3.01536925421282 |
| H  | -0.40765417740751 | -0.56438218091483 | 2.35195792302689 |
| C  | 0.18390359943183  | -2.71178953159494 | 4.78460334677870 |
| C  | -0.77553083828887 | -1.86996095975769 | 3.95169579855212 |
| C  | 1.92122344866915  | -2.90538564066690 | 1.36495579001877 |
| H  | 2.88014229353675  | -3.42384186726088 | 1.43567680785848 |
| H  | 1.94755241572572  | -2.27928894008049 | 0.46870781490331 |
| H  | 1.12876906089082  | -3.64547854752667 | 1.24083128282766 |
| C  | 3.03304226669497  | -0.69854203383115 | 3.16268817339927 |
| H  | 2.90064421931301  | -0.16489903698056 | 4.10509400852767 |
| H  | 3.09508995730899  | 0.03816685898322  | 2.35698193339605 |
| H  | 3.98094097832316  | -1.24032132261176 | 3.19193405896218 |
| H  | -1.28455010400569 | -1.18619987193256 | 4.64204695854875 |
| C  | -1.85328216050287 | -2.75808672744895 | 3.28764042082733 |
| H  | -1.32831260888882 | -3.52908899488489 | 2.71020202997530 |
| C  | -2.69151628880274 | -1.92699463234866 | 2.32722759756803 |
| C  | -2.75642694593188 | -3.43042691234136 | 4.30982192615826 |
| H  | -2.20452445726325 | -4.07346754788119 | 4.99353567281282 |
| H  | -3.28689046700554 | -2.68165417785512 | 4.90478454868337 |
| H  | -3.50645669485299 | -4.03800724357789 | 3.79988151038696 |
| H  | -3.18740107176961 | -1.10939235829037 | 2.85905845406215 |
| H  | -3.46705815233803 | -2.54793619576113 | 1.87503192910779 |
| H  | -2.09928606753551 | -1.50207619193995 | 1.51550323867735 |
| C  | -2.08186076753583 | -1.88526786955525 | 7.83996940887604 |
| Cl | -2.66043727020031 | -0.35022908954799 | 7.18788897828924 |
| Cl | -1.08589895165699 | -1.61582639101642 | 9.26561989923418 |
| Cl | -3.43160623039329 | -2.95465494317624 | 8.20892748131968 |
| H  | -1.46358193777437 | -2.36363910135703 | 7.08360646814979 |



**Figure S24.**

Optimized molecular structure of (Val)SiMe<sub>2</sub>-NMI-CHCl<sub>3</sub>.

PBE0:

final single point energy:

-2462.754741345294 a.u.

final Gibbs free energy:

-2462.46863901 a.u.

**Table S11.** Atomic coordinates for optimized structure of (Val)SiMe<sub>2</sub>-NMI-CHCl<sub>3</sub>.

|    |                   |                   |                   |
|----|-------------------|-------------------|-------------------|
| Si | 1.55223017468131  | -1.56210397572348 | 2.53239077271352  |
| O  | 1.37845566515527  | -2.55204550731245 | 4.06164846537453  |
| O  | 0.02586496948323  | -2.97615905721553 | 5.76621350634563  |
| N  | -0.04161303697526 | -0.98301642162915 | 2.89287594889111  |
| H  | -0.57339742966016 | -0.40980237620702 | 2.26481429235716  |
| N  | 1.43058908327158  | -0.33369707209691 | 0.87937444791260  |
| N  | 1.51085264509803  | 1.40937236080673  | -0.43656939651097 |
| C  | 0.23858272099204  | -2.47246935116752 | 4.67511593949558  |
| C  | -0.80296789801983 | -1.69603756955331 | 3.88447279003369  |
| C  | 1.89380017396590  | -3.05371070580820 | 1.44247745650437  |
| H  | 2.46042965162728  | -3.79121928838330 | 2.01351989566346  |
| H  | 2.45516864544796  | -2.80655091757295 | 0.54043152657875  |
| H  | 0.95737402541353  | -3.53095237868484 | 1.13986638413976  |
| C  | 3.10829702824474  | -0.68948859770397 | 3.11378477298944  |
| H  | 2.86926558238408  | 0.26243689915509  | 3.59608348731544  |
| H  | 3.80437883552191  | -0.49202890061556 | 2.29636784766132  |
| H  | 3.61667978686985  | -1.30965047140124 | 3.85261428515539  |
| C  | 1.89656927631036  | 0.89200081816295  | 0.73706719359381  |
| H  | 2.50173887549548  | 1.42644932724488  | 1.44999272309278  |
| C  | 0.75417095060688  | 0.46529219402798  | -1.08047186113031 |
| H  | 0.32782545883026  | 0.64312181609535  | -2.05294393909052 |
| C  | 0.70871538059539  | -0.61313348935124 | -0.25208935756736 |
| H  | 0.21295970205629  | -1.55916155398490 | -0.38901754263474 |
| C  | 1.83761943626675  | 2.72732534662731  | -0.93596064791313 |
| H  | 2.43333718142615  | 3.24707095556297  | -0.18935663251972 |
| H  | 0.92469410990339  | 3.29131005218099  | -1.12274135410502 |
| H  | 2.40963142169435  | 2.64613365551661  | -1.85938391641048 |
| H  | -1.31290623783997 | -1.01667294896879 | 4.58058933022528  |
| C  | -1.86790673105706 | -2.64397451635296 | 3.28455134471531  |
| H  | -1.32746765890748 | -3.40773308911390 | 2.71130796249959  |
| C  | -2.77293030622801 | -1.88327240242912 | 2.32612421837307  |
| C  | -2.70676810355126 | -3.32911666150361 | 4.35143290071633  |
| H  | -2.09868692669328 | -3.91556510671753 | 5.03818111060945  |
| H  | -3.25888905189667 | -2.58943749760648 | 4.93793447871109  |
| H  | -3.43834759133296 | -3.99321153283709 | 3.88612498249266  |
| H  | -3.28665638105587 | -1.06880600045947 | 2.84642347971238  |
| H  | -3.53595533532817 | -2.54916453378312 | 1.91745140784455  |
| H  | -2.22234383179101 | -1.45985007436276 | 1.48446702516516  |
| C  | -2.05682626736598 | -2.14639530669511 | 7.85946173367728  |
| Cl | -2.97382736106903 | -0.72250016453200 | 7.35962499111885  |
| Cl | -1.06466163730481 | -1.77768456355662 | 9.26749883635089  |
| Cl | -3.13989854726029 | -3.49523845024302 | 8.19526845476481  |
| H  | -1.39278163533833 | -2.43214848256145 | 7.04243670832000  |

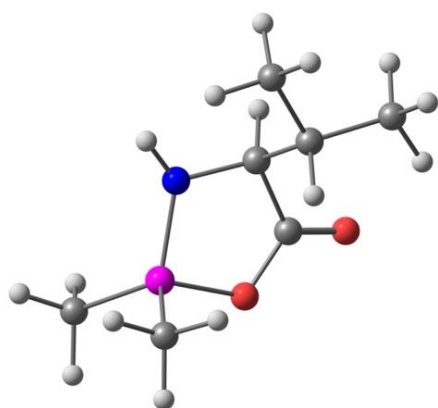

**Figure S25.**

Optimized molecular structure of **(Val)SiMe<sub>2</sub>**.

PBE0:

final single point energy: -771.522852221124 a.u.

final Gibbs free energy: -771.34369755 a.u.

**Table S12.** Atomic coordinates for optimized structure of **(Val)SiMe<sub>2</sub>**.

|    |                   |                   |                   |
|----|-------------------|-------------------|-------------------|
| Si | -0.53642672853584 | -0.01281321478315 | -0.03065145943545 |
| O  | -2.18638240803342 | -0.23678352949508 | 0.32274757890482  |
| O  | -3.53378204294981 | -0.71795807045460 | 2.02375703280564  |
| N  | -0.07814051363229 | -0.28922979110396 | 1.59753040931710  |
| H  | 0.82703602674404  | -0.13381648866357 | 2.00356092919425  |
| C  | -2.43904352306515 | -0.42661852444365 | 1.62473991267720  |
| C  | -1.20807737810951 | -0.21687291776052 | 2.50212131331037  |
| C  | -0.28436541523495 | 1.69802599508070  | -0.69803018926856 |
| H  | -0.76471258178952 | 1.81671322532352  | -1.67213642136983 |
| H  | 0.78293836851822  | 1.89721240157179  | -0.82694579020207 |
| H  | -0.69124996015856 | 2.44435645892142  | -0.01327595656569 |
| C  | 0.03751322167320  | -1.29360809067603 | -1.23425946679320 |
| H  | -0.21390641021434 | -2.29669710191797 | -0.88653490048757 |
| H  | 1.12245333749934  | -1.23350053094904 | -1.35584216508910 |
| H  | -0.41568889260515 | -1.13528017133605 | -2.21546246750858 |
| H  | -1.19319487557612 | -1.03697705592263 | 3.23040618339620  |
| C  | -1.30946311105657 | 1.11170991643805  | 3.28509999430379  |
| H  | -1.47024660122056 | 1.91026381852672  | 2.55008406395128  |
| C  | -0.00345184154987 | 1.39049337056788  | 4.01464266328365  |
| C  | -2.46609959335106 | 1.11112350771793  | 4.27214549323635  |
| H  | -3.42699026679987 | 0.96753915160364  | 3.78083033088505  |
| H  | -2.34300945882345 | 0.31084286158059  | 5.00776621217511  |
| H  | -2.49385748145172 | 2.05882664459709  | 4.81353462380980  |
| H  | 0.22967627209499  | 0.57941497581591  | 4.71115334451791  |
| H  | -0.08796579733192 | 2.31168361677607  | 4.59414460874905  |
| H  | 0.83891165495993  | 1.51116054298490  | 3.33175212220244  |

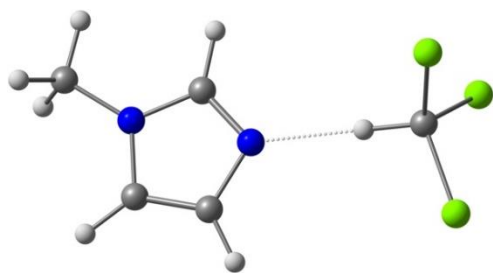

**Figure S26.**

Optimized molecular structure of **NMI-CHCl<sub>3</sub>**.

PBE0:

final single point energy:

-1691.212264473370 a.u.

final Gibbs free energy:

-1691.13013036 a.u.

**Table S13.** Atomic coordinates for optimized structure of **NMI-CHCl<sub>3</sub>**.

|    |                   |                   |                   |
|----|-------------------|-------------------|-------------------|
| C  | -0.76048763692940 | -0.22226184934574 | -0.18843621831088 |
| H  | 0.05063002610744  | -0.13836491738186 | 0.54171500064033  |
| Cl | -1.71498014086543 | -1.64852721161745 | 0.21697887395535  |
| Cl | -1.74434506681817 | 1.23769192096119  | -0.08410663794775 |
| Cl | -0.05149553454934 | -0.38243523058371 | -1.79490274206662 |
| N  | 1.47999715282168  | 0.01680983366774  | 1.96720290799562  |
| N  | 3.17410486582311  | -0.39591842760884 | 3.31633571724422  |
| C  | 2.41512463154107  | -0.84580757379618 | 2.29563481023786  |
| H  | 2.58715412734326  | -1.80507584174499 | 1.83122031780117  |
| C  | 2.69072778959197  | 0.83664241189277  | 3.66320063538998  |
| H  | 3.12778562375227  | 1.41477103286921  | 4.46021184951234  |
| C  | 1.64345903718324  | 1.07590037952903  | 2.81911693801826  |
| H  | 1.00358323157171  | 1.94320028103529  | 2.77684564859869  |
| C  | 4.28280087032923  | -1.08695339346054 | 3.93130549049222  |
| H  | 4.43328916600724  | -2.03441339150522 | 3.41803813299897  |
| H  | 4.07339861530354  | -1.28258576468545 | 4.98301046414388  |
| H  | 5.19236456278654  | -0.49189349122525 | 3.85102513629630  |

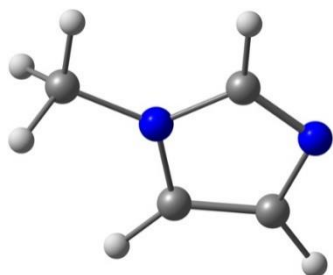

**Figure S27.**

Optimized molecular structure of **NMI**.

PBE0:

final single point energy:

-265.536400689952 a.u.

final Gibbs free energy:

-265.46485758 a.u.

**Table S14.** Atomic coordinates for optimized structure of **NMI**.

|   |                  |                   |                   |
|---|------------------|-------------------|-------------------|
| N | 1.99337240176287 | 0.05429921370311  | 0.20549197659312  |
| N | 4.16317804897557 | -0.20500266289349 | -0.12677783754544 |
| C | 2.92745568831647 | -0.73083123877837 | -0.27944574168642 |
| H | 2.77229495744862 | -1.68941473297887 | -0.75225361721750 |
| C | 4.00715414175282 | 1.00091721961695  | 0.49994335102419  |
| H | 4.84801199060323 | 1.62954534695676  | 0.74211912462789  |
| C | 2.66184173996216 | 1.14348361710051  | 0.69668773673521  |
| H | 2.14297886918333 | 1.96709774499015  | 1.16221859378846  |
| C | 5.40911938125823 | -0.80505751646774 | -0.53890561763150 |
| H | 5.19772307672831 | -1.76100299202518 | -1.01381704013969 |
| H | 6.05520739330288 | -0.97367860180865 | 0.32297629703655  |
| H | 5.92522737370547 | -0.16235973341518 | -1.25235308358487 |

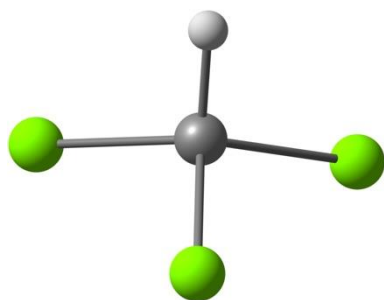

**Figure S28.**

Optimized molecular structure of **CHCl<sub>3</sub>**.

PBE0:

final single point energy: -1425.667678253672 a.u.

final Gibbs free energy: -1425.67637414 a.u.

**Table S15.** Atomic coordinates for optimized structure of **CHCl<sub>3</sub>**.

|    |                   |                   |                   |
|----|-------------------|-------------------|-------------------|
| C  | 0.00096893517865  | -0.00044281725380 | -0.02218018811680 |
| H  | 0.00001922524628  | -0.00012497288538 | 1.06154555594259  |
| Cl | -0.83736828272343 | -1.45047027936703 | -0.56337115722042 |
| Cl | -0.83851514347521 | 1.44790245433247  | -0.56503956635292 |
| Cl | 1.67695860577371  | -0.00019479082625 | -0.56318307425245 |

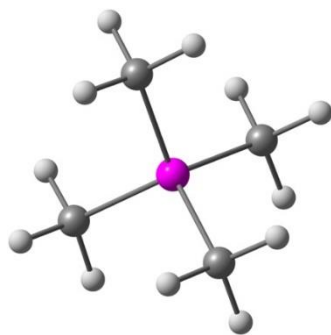

**Figure S29.**

Optimized molecular structure of **SiMe<sub>4</sub>**.

PBE0:

final single point energy: -450.025991074705 a.u.

final Gibbs free energy: -449.91135276 a.u.

**Table S16.** Atomic coordinates for optimized structure of **SiMe<sub>4</sub>**.

|    |                   |                   |                   |
|----|-------------------|-------------------|-------------------|
| Si | 0.00714122583757  | -0.00933554648435 | -0.02081052932285 |
| C  | -1.53590169769129 | -0.70678140586966 | 0.78434486367904  |
| H  | -1.56301774895502 | -1.79586116543702 | 0.69625240673790  |
| H  | -1.57154008129356 | -0.45476507563685 | 1.84718029693305  |
| H  | -2.43875994108642 | -0.30926102404289 | 0.31405358790119  |
| C  | 1.52218676061079  | -0.72779092398927 | 0.81843325603365  |
| H  | 1.53474816786991  | -0.47833075749753 | 1.88241291151602  |
| H  | 1.53803117553011  | -1.81693461977911 | 0.72857012122681  |
| H  | 2.44104718449280  | -0.34035994509016 | 0.37134817567130  |
| C  | 0.01825927262681  | 1.85751093410415  | 0.15428248157196  |
| H  | 0.00792913875686  | 2.15300516206046  | 1.20640344213145  |
| H  | 0.91047101686339  | 2.28804975990319  | -0.30729980684061 |
| H  | -0.85646017548843 | 2.30083297345235  | -0.32820551491108 |
| C  | 0.02256641668785  | -0.46380437419999 | -1.84006277985621 |
| H  | 0.91447674933791  | -0.07078025001423 | -2.33449778778393 |
| H  | 0.01442250158206  | -1.54842385804725 | -1.97408629025857 |
| H  | -0.85252018368134 | -0.05548220043182 | -2.35195143542913 |
