# Supplementary material for: Lewis Acid-Base Adducts of α-Amino Acid-Derived Silaheterocycles and N-Methylimidazole
Source: Molecules. 2023 Nov 28;28(23):7816. doi: 10.3390/molecules28237816 (PMC10708346; doi:10.3390/molecules28237816)
Supplement: Supplementary file 1 [file molecules-28-07816-s001.zip › all-in-one.cif]

 
data_as102b_01

# start Validation Reply Form
_vrf_CRYSS02_as102b_01
;
PROBLEM: The value of _exptl_crystal_size_min is > 0.6
   Minimum crystal size given =   1.000
RESPONSE: For this and the other two related crystal size alerts:
 The compound was crystallized inside a glass capillary.
 The dimensions of the crystal itself were smaller, but the dimensions
 of the relevant capillary section are reported, because this volume
 of the capillary was filled with solid and liquid of the composition
 of the crystal and thus contributed to the absorption.
;

# end Validation Reply Form
 
_audit_creation_method            'SHELXL-2018/3'
_shelx_SHELXL_version_number      '2018/3'
_chemical_name_systematic         ?
_chemical_name_common             ?
_chemical_melting_point           ?
_chemical_formula_moiety          'C10 H19 N3 O2 Si, C H Cl3' 
_chemical_formula_sum
 'C11 H20 Cl3 N3 O2 Si' 
_chemical_formula_weight          360.74

loop_
 _atom_type_symbol
 _atom_type_description
 _atom_type_scat_dispersion_real
 _atom_type_scat_dispersion_imag
 _atom_type_scat_source
 'C'  'C'   0.0033   0.0016
 'International Tables Vol C Tables 4.2.6.8 and 6.1.1.4'
 'H'  'H'   0.0000   0.0000
 'International Tables Vol C Tables 4.2.6.8 and 6.1.1.4'
 'N'  'N'   0.0061   0.0033
 'International Tables Vol C Tables 4.2.6.8 and 6.1.1.4'
 'O'  'O'   0.0106   0.0060
 'International Tables Vol C Tables 4.2.6.8 and 6.1.1.4'
 'Si'  'Si'   0.0817   0.0704
 'International Tables Vol C Tables 4.2.6.8 and 6.1.1.4'
 'Cl'  'Cl'   0.1484   0.1585
 'International Tables Vol C Tables 4.2.6.8 and 6.1.1.4'
 
_space_group_crystal_system       monoclinic
_space_group_IT_number            14
_space_group_name_H-M_alt         'P 21/n'
_space_group_name_Hall            '-P 2yn'
 
_shelx_space_group_comment
;
The symmetry employed for this shelxl refinement is uniquely defined
by the following loop, which should always be used as a source of
symmetry information in preference to the above space-group names.
They are only intended as comments.
;
 
loop_
 _space_group_symop_operation_xyz
 'x, y, z'
 '-x+1/2, y+1/2, -z+1/2'
 '-x, -y, -z'
 'x-1/2, -y-1/2, z-1/2'
 
_cell_length_a                    8.2985(3)
_cell_length_b                    11.9564(2)
_cell_length_c                    18.3551(6)
_cell_angle_alpha                 90
_cell_angle_beta                  96.346(3)
_cell_angle_gamma                 90
_cell_volume                      1810.04(9)
_cell_formula_units_Z             4
_cell_measurement_temperature     220(2)
_cell_measurement_reflns_used    23841
_cell_measurement_theta_min      1.12
_cell_measurement_theta_max      26.19
 
_exptl_crystal_description        column
_exptl_crystal_colour             colorless
_exptl_crystal_density_meas       ?
_exptl_crystal_density_method     ?
_exptl_crystal_density_diffrn     1.324          
_exptl_crystal_F_000              752
_exptl_transmission_factor_min    ?
_exptl_transmission_factor_max    ?
_exptl_crystal_size_max           5.000
_exptl_crystal_size_mid           1.000
_exptl_crystal_size_min           1.000
_exptl_absorpt_coefficient_mu     0.576
_shelx_estimated_absorpt_T_min    0.161
_shelx_estimated_absorpt_T_max    0.597
_exptl_absorpt_correction_type   integration
_exptl_absorpt_correction_T_min  0.1733
_exptl_absorpt_correction_T_max  0.6087
_exptl_absorpt_process_details    XShape
_exptl_absorpt_special_details    ?
_diffrn_ambient_temperature       220(2)
_diffrn_radiation_wavelength      0.71073
_diffrn_radiation_type            MoK\a
_diffrn_source                    ?
_diffrn_measurement_device_type   'Stoe IPDS 2'
_diffrn_measurement_method        'omega scans'
_diffrn_detector_area_resol_mean  ?
_diffrn_reflns_number             26805
_diffrn_reflns_av_unetI/netI      0.0214
_diffrn_reflns_av_R_equivalents   0.0507
_diffrn_reflns_limit_h_min        -9
_diffrn_reflns_limit_h_max        10
_diffrn_reflns_limit_k_min        -14
_diffrn_reflns_limit_k_max        14
_diffrn_reflns_limit_l_min        -22
_diffrn_reflns_limit_l_max        22
_diffrn_reflns_theta_min          2.037
_diffrn_reflns_theta_max          25.999
_diffrn_reflns_theta_full         25.242
_diffrn_measured_fraction_theta_max   0.998
_diffrn_measured_fraction_theta_full  0.998
_diffrn_reflns_Laue_measured_fraction_max    0.998
_diffrn_reflns_Laue_measured_fraction_full   0.998
_diffrn_reflns_point_group_measured_fraction_max   0.998
_diffrn_reflns_point_group_measured_fraction_full  0.998
_reflns_number_total              3543
_reflns_number_gt                 2998
_reflns_threshold_expression      'I > 2\s(I)'
_reflns_Friedel_coverage          0.000
_reflns_Friedel_fraction_max      .
_reflns_Friedel_fraction_full     .
 
_reflns_special_details
;
 Reflections were merged by SHELXL according to the crystal
 class for the calculation of statistics and refinement.
 
 _reflns_Friedel_fraction is defined as the number of unique
 Friedel pairs measured divided by the number that would be
 possible theoretically, ignoring centric projections and
 systematic absences.
;
 
_computing_data_collection        ?
_computing_cell_refinement        ?
_computing_data_reduction         ?
_computing_structure_solution     ?
_computing_structure_refinement 'SHELXL-2018/3 (Sheldrick, 2018)'
_computing_molecular_graphics     ?
_computing_publication_material   ?
_refine_special_details           
;
 This compound is a liquid around room temperature (melting in its
 own constituents NMI and CHCl3 at temperatures around 300 K). For
 crystallization this melt was transferred into a glass capillary
 (1 mm diameter) and flame-sealed. On the diffractometer the sample
 was cooled to 260 K and then allowed to warm up again. In the latter
 phase it formed a polycrystalline solid, which produced a rather weak
 powder diffraction pattern. Slow melting with retention of some of
 the crystalline material in the central and coldest part of the
 capillary (by heating the N2-flow up to 300 K) followed by
 slow cooling to 288 K caused the formation of crystalline needles.
 In another cycle of heating and cooling, one of those needles was
 retained in the microscope section of the capillary and grown into 
 a larger single crystal.
 In addition to the absorption correction with a long
 needle model, to account for the absorption by this compound and
 the surrounding glass capillary container, scaling and outlier
 rejection was applied.
;
_refine_ls_structure_factor_coef  Fsqd
_refine_ls_matrix_type            full
_refine_ls_weighting_scheme       calc
_refine_ls_weighting_details
'w=1/[\s^2^(Fo^2^)+(0.0376P)^2^+1.0492P] where P=(Fo^2^+2Fc^2^)/3'
_atom_sites_solution_primary      ShelXT
_atom_sites_solution_secondary    ?
_atom_sites_solution_hydrogens    mixed
_refine_ls_hydrogen_treatment     mixed
_refine_ls_extinction_method      'SHELXL-2018/3 (Sheldrick 2018)'
_refine_ls_extinction_coef        0.0069(13)
_refine_ls_extinction_expression
 'Fc^*^=kFc[1+0.001xFc^2^\l^3^/sin(2\q)]^-1/4^'
_refine_ls_number_reflns          3543
_refine_ls_number_parameters      280
_refine_ls_number_restraints      165
_refine_ls_R_factor_all           0.0562
_refine_ls_R_factor_gt            0.0472
_refine_ls_wR_factor_ref          0.1224
_refine_ls_wR_factor_gt           0.1185
_refine_ls_goodness_of_fit_ref    1.160
_refine_ls_restrained_S_all       1.145
_refine_ls_shift/su_max           0.001
_refine_ls_shift/su_mean          0.000
 
loop_
 _atom_site_label
 _atom_site_type_symbol
 _atom_site_fract_x
 _atom_site_fract_y
 _atom_site_fract_z
 _atom_site_U_iso_or_equiv
 _atom_site_adp_type
 _atom_site_occupancy
 _atom_site_site_symmetry_order  
 _atom_site_calc_flag
 _atom_site_refinement_flags_posn
 _atom_site_refinement_flags_adp
 _atom_site_refinement_flags_occupancy
 _atom_site_disorder_assembly
 _atom_site_disorder_group
Si1 Si 0.24901(7) 0.47428(6) 0.79298(4) 0.0469(2) Uani 1 1 d D . . . .
O1 O 0.2861(2) 0.53909(15) 0.70473(9) 0.0593(5) Uani 1 1 d . . . . .
O2 O 0.4766(3) 0.5785(2) 0.63322(10) 0.0805(6) Uani 1 1 d . . . . .
N1 N 0.4548(2) 0.45594(19) 0.80612(11) 0.0513(5) Uani 1 1 d . . . . .
H1N H 0.494(3) 0.416(2) 0.8367(15) 0.048(7) Uiso 1 1 d . . . . .
C1 C 0.4345(3) 0.5391(2) 0.68990(13) 0.0566(6) Uani 1 1 d . . . . .
C2 C 0.5531(3) 0.4859(2) 0.74834(12) 0.0491(5) Uani 1 1 d . . . . .
C3 C 0.6286(4) 0.3832(3) 0.71647(17) 0.0718(8) Uani 1 1 d . . . . .
H3A H 0.697573 0.345213 0.754831 0.108 Uiso 1 1 calc R U . . .
H3B H 0.692844 0.406218 0.678020 0.108 Uiso 1 1 calc R U . . .
H3C H 0.543461 0.332900 0.696261 0.108 Uiso 1 1 calc R U . . .
C4 C 0.6836(3) 0.5705(3) 0.77527(15) 0.0684(8) Uani 1 1 d . . . . .
H4A H 0.633319 0.635959 0.794274 0.103 Uiso 1 1 calc R U . . .
H4B H 0.743008 0.592281 0.734881 0.103 Uiso 1 1 calc R U . . .
H4C H 0.757670 0.537082 0.813787 0.103 Uiso 1 1 calc R U . . .
C5 C 0.1060(3) 0.3677(2) 0.74845(15) 0.0628(7) Uani 1 1 d . . . . .
H5A H 0.164950 0.299644 0.740231 0.094 Uiso 1 1 calc R U . . .
H5B H 0.056049 0.396384 0.701898 0.094 Uiso 1 1 calc R U . . .
H5C H 0.022604 0.351735 0.780074 0.094 Uiso 1 1 calc R U . . .
C6 C 0.1474(4) 0.6024(2) 0.82351(18) 0.0726(8) Uani 1 1 d . . . . .
H6A H 0.226866 0.649649 0.851339 0.109 Uiso 1 1 calc R U . . .
H6B H 0.064271 0.581146 0.854089 0.109 Uiso 1 1 calc R U . . .
H6C H 0.098192 0.642957 0.780992 0.109 Uiso 1 1 calc R U . . .
N2 N 0.2406(6) 0.3984(4) 0.89178(16) 0.0525(7) Uani 0.635(10) 1 d D . P A 1
N3 N 0.2366(6) 0.2753(5) 0.9800(3) 0.0689(15) Uani 0.635(10) 1 d D . P A 1
C7 C 0.2187(6) 0.2929(5) 0.9077(3) 0.0531(13) Uani 0.635(10) 1 d D . P A 1
H7 H 0.193512 0.236563 0.872481 0.064 Uiso 0.635(10) 1 calc R U P A 1
C8 C 0.2718(10) 0.3750(6) 1.0119(3) 0.113(3) Uani 0.635(10) 1 d D . P A 1
H8 H 0.290924 0.388774 1.062549 0.135 Uiso 0.635(10) 1 calc R U P A 1
C9 C 0.2746(10) 0.4515(7) 0.9579(3) 0.106(3) Uani 0.635(10) 1 d D . P A 1
H9 H 0.296117 0.528250 0.964610 0.127 Uiso 0.635(10) 1 calc R U P A 1
C10 C 0.2236(17) 0.1668(7) 1.0166(4) 0.102(3) Uani 0.635(10) 1 d D . P A 1
H10A H 0.203633 0.108432 0.979976 0.152 Uiso 0.635(10) 1 calc R U P A 1
H10B H 0.134731 0.169114 1.046720 0.152 Uiso 0.635(10) 1 calc R U P A 1
H10C H 0.323963 0.151131 1.047228 0.152 Uiso 0.635(10) 1 calc R U P A 1
N2A N 0.2615(10) 0.4131(7) 0.8970(2) 0.0525(7) Uani 0.365(10) 1 d D . P A 2
N3A N 0.2617(10) 0.3016(6) 0.9923(4) 0.067(3) Uani 0.365(10) 1 d D . P A 2
C7A C 0.2134(9) 0.3168(7) 0.9211(4) 0.051(2) Uani 0.365(10) 1 d D . P A 2
H7A H 0.151942 0.264364 0.891671 0.061 Uiso 0.365(10) 1 calc R U P A 2
C8A C 0.3460(12) 0.3935(7) 1.0156(5) 0.071(3) Uani 0.365(10) 1 d D . P A 2
H8A H 0.395276 0.407211 1.063322 0.085 Uiso 0.365(10) 1 calc R U P A 2
C9A C 0.3460(11) 0.4621(8) 0.9571(4) 0.065(2) Uani 0.365(10) 1 d D . P A 2
H9A H 0.396219 0.532602 0.957566 0.078 Uiso 0.365(10) 1 calc R U P A 2
C10A C 0.227(3) 0.2032(9) 1.0360(6) 0.096(5) Uani 0.365(10) 1 d D . P A 2
H10D H 0.160212 0.151048 1.005577 0.143 Uiso 0.365(10) 1 calc R U P A 2
H10E H 0.170326 0.226427 1.076904 0.143 Uiso 0.365(10) 1 calc R U P A 2
H10F H 0.328206 0.167065 1.054473 0.143 Uiso 0.365(10) 1 calc R U P A 2
Cl1 Cl 0.7167(9) 0.8003(7) 0.5705(4) 0.0970(14) Uani 0.521(14) 1 d D . P B 1
Cl2 Cl 0.7801(10) 0.6387(7) 0.4624(3) 0.1005(15) Uani 0.521(14) 1 d D . P B 1
Cl3 Cl 0.952(2) 0.6263(11) 0.6068(7) 0.0913(14) Uani 0.521(14) 1 d D . P B 1
C11 C 0.7685(13) 0.6611(7) 0.5554(3) 0.0646(9) Uani 0.521(14) 1 d D . P B 1
H11 H 0.682336 0.612407 0.571167 0.077 Uiso 0.521(14) 1 calc R U P B 1
Cl1A Cl 0.7574(15) 0.8003(8) 0.5610(5) 0.112(3) Uani 0.365(10) 1 d D . P C 2
Cl2A Cl 0.7412(17) 0.6006(8) 0.4729(5) 0.126(3) Uani 0.365(10) 1 d D . P C 2
Cl3A Cl 0.953(3) 0.6092(17) 0.6078(11) 0.0913(14) Uani 0.365(10) 1 d D . P C 2
C11A C 0.769(2) 0.6544(8) 0.5616(5) 0.0646(9) Uani 0.365(10) 1 d D . P C 2
H11A H 0.680189 0.625640 0.588418 0.077 Uiso 0.365(10) 1 calc R U P C 2
Cl1B Cl 0.691(3) 0.8254(19) 0.5728(14) 0.0970(14) Uani 0.113(12) 1 d D . P D 3
Cl2B Cl 0.722(3) 0.657(2) 0.4640(8) 0.1005(15) Uani 0.113(12) 1 d D . P D 3
Cl3B Cl 0.936(2) 0.656(2) 0.5977(9) 0.0913(14) Uani 0.113(12) 1 d D . P D 3
C11B C 0.740(2) 0.6859(17) 0.5577(8) 0.0646(9) Uani 0.113(12) 1 d D . P D 3
H11B H 0.663183 0.637648 0.580818 0.077 Uiso 0.113(12) 1 calc R U P D 3
 
loop_
 _atom_site_aniso_label
 _atom_site_aniso_U_11
 _atom_site_aniso_U_22
 _atom_site_aniso_U_33
 _atom_site_aniso_U_23
 _atom_site_aniso_U_13
 _atom_site_aniso_U_12
Si1 0.0417(3) 0.0507(4) 0.0482(4) 0.0002(3) 0.0049(3) 0.0026(3)
O1 0.0535(10) 0.0680(11) 0.0547(10) 0.0171(9) -0.0017(8) 0.0013(8)
O2 0.0861(14) 0.1032(16) 0.0523(11) 0.0203(11) 0.0082(10) -0.0248(12)
N1 0.0445(10) 0.0667(13) 0.0426(11) 0.0110(10) 0.0046(9) 0.0062(10)
C1 0.0619(15) 0.0615(15) 0.0458(13) 0.0025(11) 0.0028(11) -0.0123(12)
C2 0.0457(12) 0.0593(14) 0.0431(12) -0.0037(10) 0.0088(10) -0.0035(10)
C3 0.0702(18) 0.0758(19) 0.0726(18) -0.0181(15) 0.0216(15) 0.0000(15)
C4 0.0635(16) 0.086(2) 0.0552(15) -0.0079(14) 0.0044(13) -0.0228(15)
C5 0.0613(15) 0.0649(16) 0.0613(16) 0.0001(13) 0.0024(13) -0.0074(13)
C6 0.0629(16) 0.0634(17) 0.092(2) -0.0053(15) 0.0122(15) 0.0085(14)
N2 0.0576(16) 0.0596(16) 0.0419(10) -0.0101(10) 0.0136(10) -0.0065(12)
N3 0.070(3) 0.101(3) 0.037(2) 0.001(2) 0.0113(18) -0.008(2)
C7 0.065(3) 0.062(2) 0.0335(19) -0.0057(19) 0.0097(18) -0.0036(19)
C8 0.172(9) 0.127(4) 0.039(3) -0.019(3) 0.015(4) -0.037(4)
C9 0.170(9) 0.096(4) 0.053(2) -0.027(2) 0.016(3) -0.038(5)
C10 0.128(7) 0.125(5) 0.050(4) 0.027(4) 0.002(4) -0.017(6)
N2A 0.0576(16) 0.0596(16) 0.0419(10) -0.0101(10) 0.0136(10) -0.0065(12)
N3A 0.098(6) 0.068(4) 0.037(3) 0.001(3) 0.014(3) -0.019(4)
C7A 0.064(5) 0.057(3) 0.034(4) -0.017(3) 0.017(3) -0.008(3)
C8A 0.100(7) 0.075(4) 0.039(3) -0.009(3) 0.011(4) -0.018(4)
C9A 0.084(6) 0.067(5) 0.043(3) -0.009(2) 0.009(3) -0.019(4)
C10A 0.148(13) 0.083(6) 0.060(7) 0.017(5) 0.031(9) -0.021(7)
Cl1 0.090(3) 0.063(3) 0.139(2) -0.0025(19) 0.0163(19) -0.0054(17)
Cl2 0.104(3) 0.142(4) 0.0544(10) 0.0042(17) 0.0052(13) 0.008(3)
Cl3 0.0751(8) 0.126(4) 0.0717(8) 0.028(2) 0.0043(6) 0.010(3)
C11 0.0688(19) 0.067(2) 0.0566(17) 0.0096(16) 0.0034(16) -0.0038(17)
Cl1A 0.124(6) 0.071(3) 0.129(5) 0.017(3) -0.045(4) -0.019(3)
Cl2A 0.174(7) 0.128(5) 0.068(3) -0.016(3) -0.018(3) 0.013(5)
Cl3A 0.0751(8) 0.126(4) 0.0717(8) 0.028(2) 0.0043(6) 0.010(3)
C11A 0.0688(19) 0.067(2) 0.0566(17) 0.0096(16) 0.0034(16) -0.0038(17)
Cl1B 0.090(3) 0.063(3) 0.139(2) -0.0025(19) 0.0163(19) -0.0054(17)
Cl2B 0.104(3) 0.142(4) 0.0544(10) 0.0042(17) 0.0052(13) 0.008(3)
Cl3B 0.0751(8) 0.126(4) 0.0717(8) 0.028(2) 0.0043(6) 0.010(3)
C11B 0.0688(19) 0.067(2) 0.0566(17) 0.0096(16) 0.0034(16) -0.0038(17)
 
_geom_special_details
;
 All esds (except the esd in the dihedral angle between two l.s. planes)
 are estimated using the full covariance matrix.  The cell esds are taken
 into account individually in the estimation of esds in distances, angles
 and torsion angles; correlations between esds in cell parameters are only
 used when they are defined by crystal symmetry.  An approximate (isotropic)
 treatment of cell esds is used for estimating esds involving l.s. planes.
;
 
loop_
 _geom_bond_atom_site_label_1
 _geom_bond_atom_site_label_2
 _geom_bond_distance
 _geom_bond_site_symmetry_2
 _geom_bond_publ_flag
Si1 N1 1.713(2) . ?
Si1 O1 1.8518(18) . ?
Si1 C6 1.864(3) . ?
Si1 C5 1.867(3) . ?
Si1 N2A 2.036(2) . ?
Si1 N2 2.036(2) . ?
O1 C1 1.291(3) . ?
O2 C1 1.227(3) . ?
N1 C2 1.452(3) . ?
N1 H1N 0.78(3) . ?
C1 C2 1.513(3) . ?
C2 C4 1.524(3) . ?
C2 C3 1.524(4) . ?
C3 H3A 0.9700 . ?
C3 H3B 0.9700 . ?
C3 H3C 0.9700 . ?
C4 H4A 0.9700 . ?
C4 H4B 0.9700 . ?
C4 H4C 0.9700 . ?
C5 H5A 0.9700 . ?
C5 H5B 0.9700 . ?
C5 H5C 0.9700 . ?
C6 H6A 0.9700 . ?
C6 H6B 0.9700 . ?
C6 H6C 0.9700 . ?
N2 C7 1.312(4) . ?
N2 C9 1.372(4) . ?
N3 C7 1.336(4) . ?
N3 C8 1.346(6) . ?
N3 C10 1.471(5) . ?
C7 H7 0.9400 . ?
C8 C9 1.351(6) . ?
C8 H8 0.9400 . ?
C9 H9 0.9400 . ?
C10 H10A 0.9700 . ?
C10 H10B 0.9700 . ?
C10 H10C 0.9700 . ?
N2A C7A 1.312(4) . ?
N2A C9A 1.372(4) . ?
N3A C7A 1.336(4) . ?
N3A C8A 1.346(6) . ?
N3A C10A 1.471(5) . ?
C7A H7A 0.9400 . ?
C8A C9A 1.351(6) . ?
C8A H8A 0.9400 . ?
C9A H9A 0.9400 . ?
C10A H10D 0.9700 . ?
C10A H10E 0.9700 . ?
C10A H10F 0.9700 . ?
Cl1 C11 1.748(3) . ?
Cl2 C11 1.742(3) . ?
Cl3 C11 1.748(3) . ?
C11 H11 0.9900 . ?
Cl1A C11A 1.746(4) . ?
Cl2A C11A 1.742(4) . ?
Cl3A C11A 1.746(4) . ?
C11A H11A 0.9900 . ?
Cl1B C11B 1.746(4) . ?
Cl2B C11B 1.745(4) . ?
Cl3B C11B 1.745(4) . ?
C11B H11B 0.9900 . ?
 
loop_
 _geom_angle_atom_site_label_1
 _geom_angle_atom_site_label_2
 _geom_angle_atom_site_label_3
 _geom_angle
 _geom_angle_site_symmetry_1
 _geom_angle_site_symmetry_3
 _geom_angle_publ_flag
N1 Si1 O1 85.25(9) . . ?
N1 Si1 C6 122.69(13) . . ?
O1 Si1 C6 92.50(12) . . ?
N1 Si1 C5 123.38(12) . . ?
O1 Si1 C5 93.53(11) . . ?
C6 Si1 C5 113.92(14) . . ?
N1 Si1 N2A 82.8(2) . . ?
O1 Si1 N2A 167.0(2) . . ?
C6 Si1 N2A 89.5(3) . . ?
C5 Si1 N2A 97.4(3) . . ?
N1 Si1 N2 87.10(16) . . ?
O1 Si1 N2 172.33(16) . . ?
C6 Si1 N2 92.1(2) . . ?
C5 Si1 N2 90.18(18) . . ?
C1 O1 Si1 116.06(15) . . ?
C2 N1 Si1 119.83(17) . . ?
C2 N1 H1N 116.8(19) . . ?
Si1 N1 H1N 120.8(19) . . ?
O2 C1 O1 123.1(3) . . ?
O2 C1 C2 122.6(2) . . ?
O1 C1 C2 114.3(2) . . ?
N1 C2 C1 104.36(19) . . ?
N1 C2 C4 111.3(2) . . ?
C1 C2 C4 109.5(2) . . ?
N1 C2 C3 111.7(2) . . ?
C1 C2 C3 109.2(2) . . ?
C4 C2 C3 110.6(2) . . ?
C2 C3 H3A 109.5 . . ?
C2 C3 H3B 109.5 . . ?
H3A C3 H3B 109.5 . . ?
C2 C3 H3C 109.5 . . ?
H3A C3 H3C 109.5 . . ?
H3B C3 H3C 109.5 . . ?
C2 C4 H4A 109.5 . . ?
C2 C4 H4B 109.5 . . ?
H4A C4 H4B 109.5 . . ?
C2 C4 H4C 109.5 . . ?
H4A C4 H4C 109.5 . . ?
H4B C4 H4C 109.5 . . ?
Si1 C5 H5A 109.5 . . ?
Si1 C5 H5B 109.5 . . ?
H5A C5 H5B 109.5 . . ?
Si1 C5 H5C 109.5 . . ?
H5A C5 H5C 109.5 . . ?
H5B C5 H5C 109.5 . . ?
Si1 C6 H6A 109.5 . . ?
Si1 C6 H6B 109.5 . . ?
H6A C6 H6B 109.5 . . ?
Si1 C6 H6C 109.5 . . ?
H6A C6 H6C 109.5 . . ?
H6B C6 H6C 109.5 . . ?
C7 N2 C9 105.6(4) . . ?
C7 N2 Si1 130.2(4) . . ?
C9 N2 Si1 123.9(4) . . ?
C7 N3 C8 106.8(4) . . ?
C7 N3 C10 125.9(5) . . ?
C8 N3 C10 127.3(4) . . ?
N2 C7 N3 111.6(4) . . ?
N2 C7 H7 124.2 . . ?
N3 C7 H7 124.2 . . ?
N3 C8 C9 107.5(4) . . ?
N3 C8 H8 126.2 . . ?
C9 C8 H8 126.2 . . ?
C8 C9 N2 108.5(5) . . ?
C8 C9 H9 125.8 . . ?
N2 C9 H9 125.8 . . ?
N3 C10 H10A 109.5 . . ?
N3 C10 H10B 109.5 . . ?
H10A C10 H10B 109.5 . . ?
N3 C10 H10C 109.5 . . ?
H10A C10 H10C 109.5 . . ?
H10B C10 H10C 109.5 . . ?
C7A N2A C9A 104.5(6) . . ?
C7A N2A Si1 130.3(6) . . ?
C9A N2A Si1 124.7(5) . . ?
C7A N3A C8A 106.8(4) . . ?
C7A N3A C10A 125.9(5) . . ?
C8A N3A C10A 127.3(4) . . ?
N2A C7A N3A 112.3(5) . . ?
N2A C7A H7A 123.8 . . ?
N3A C7A H7A 123.8 . . ?
N3A C8A C9A 106.8(5) . . ?
N3A C8A H8A 126.6 . . ?
C9A C8A H8A 126.6 . . ?
C8A C9A N2A 109.6(7) . . ?
C8A C9A H9A 125.2 . . ?
N2A C9A H9A 125.2 . . ?
N3A C10A H10D 109.5 . . ?
N3A C10A H10E 109.5 . . ?
H10D C10A H10E 109.5 . . ?
N3A C10A H10F 109.5 . . ?
H10D C10A H10F 109.5 . . ?
H10E C10A H10F 109.5 . . ?
Cl2 C11 Cl3 110.7(3) . . ?
Cl2 C11 Cl1 110.1(3) . . ?
Cl3 C11 Cl1 110.8(3) . . ?
Cl2 C11 H11 108.4 . . ?
Cl3 C11 H11 108.4 . . ?
Cl1 C11 H11 108.4 . . ?
Cl2A C11A Cl3A 110.9(4) . . ?
Cl2A C11A Cl1A 111.2(4) . . ?
Cl3A C11A Cl1A 110.8(4) . . ?
Cl2A C11A H11A 107.9 . . ?
Cl3A C11A H11A 107.9 . . ?
Cl1A C11A H11A 107.9 . . ?
Cl2B C11B Cl3B 110.5(5) . . ?
Cl2B C11B Cl1B 110.4(5) . . ?
Cl3B C11B Cl1B 110.4(5) . . ?
Cl2B C11B H11B 108.5 . . ?
Cl3B C11B H11B 108.5 . . ?
Cl1B C11B H11B 108.5 . . ?
 
loop_
 _geom_torsion_atom_site_label_1
 _geom_torsion_atom_site_label_2
 _geom_torsion_atom_site_label_3
 _geom_torsion_atom_site_label_4
 _geom_torsion
 _geom_torsion_site_symmetry_1
 _geom_torsion_site_symmetry_2
 _geom_torsion_site_symmetry_3
 _geom_torsion_site_symmetry_4
 _geom_torsion_publ_flag
N1 Si1 O1 C1 2.6(2) . . . . ?
C6 Si1 O1 C1 125.2(2) . . . . ?
C5 Si1 O1 C1 -120.6(2) . . . . ?
N2A Si1 O1 C1 26.7(13) . . . . ?
O1 Si1 N1 C2 -4.58(19) . . . . ?
C6 Si1 N1 C2 -94.5(2) . . . . ?
C5 Si1 N1 C2 86.5(2) . . . . ?
N2A Si1 N1 C2 -179.3(3) . . . . ?
N2 Si1 N1 C2 174.8(2) . . . . ?
Si1 O1 C1 O2 179.5(2) . . . . ?
Si1 O1 C1 C2 -0.3(3) . . . . ?
Si1 N1 C2 C1 5.2(3) . . . . ?
Si1 N1 C2 C4 123.2(2) . . . . ?
Si1 N1 C2 C3 -112.7(2) . . . . ?
O2 C1 C2 N1 177.5(3) . . . . ?
O1 C1 C2 N1 -2.8(3) . . . . ?
O2 C1 C2 C4 58.3(3) . . . . ?
O1 C1 C2 C4 -122.0(2) . . . . ?
O2 C1 C2 C3 -63.0(3) . . . . ?
O1 C1 C2 C3 116.8(2) . . . . ?
C9 N2 C7 N3 0.00(3) . . . . ?
Si1 N2 C7 N3 174.1(4) . . . . ?
C8 N3 C7 N2 0.00(3) . . . . ?
C10 N3 C7 N2 -178.7(8) . . . . ?
C7 N3 C8 C9 0.00(5) . . . . ?
C10 N3 C8 C9 178.7(8) . . . . ?
N3 C8 C9 N2 0.00(7) . . . . ?
C7 N2 C9 C8 0.00(5) . . . . ?
Si1 N2 C9 C8 -174.5(4) . . . . ?
C9A N2A C7A N3A 0.00(3) . . . . ?
Si1 N2A C7A N3A 171.8(8) . . . . ?
C8A N3A C7A N2A 0.00(3) . . . . ?
C10A N3A C7A N2A 179.6(14) . . . . ?
C7A N3A C8A C9A 0.00(5) . . . . ?
C10A N3A C8A C9A -179.6(15) . . . . ?
N3A C8A C9A N2A 0.00(7) . . . . ?
C7A N2A C9A C8A 0.00(5) . . . . ?
Si1 N2A C9A C8A -172.4(7) . . . . ?
 
_refine_diff_density_max    0.188
_refine_diff_density_min   -0.189
_refine_diff_density_rms    0.040

_shelx_res_file
;
TITL AS102b_01
    shelx.res
    created by SHELXL-2018/3 at 14:01:36 on 28-Jul-2022
CELL  0.71073    8.2985  11.9564  18.3551   90.000   96.346   90.000
ZERR     4.00    0.0003   0.0002   0.0006    0.000    0.003    0.000
LATT 1
SYMM 1/2-X, 1/2+Y, 1/2-Z
SFAC C  H  N  O  Si Cl
UNIT 44  80  12  8  4  12
OMIT 0 52
omit 2 1 2
omit -2 2 4
omit -4 0 2
omit 2 3 10
L.S. 4
ACTA
BOND  $H
CONF
TEMP -53
SIZE 5.0 1.0 1.0
FMAP 2
PLAN 20
sadi 0.001 si1 n2 si1 n2a
rem exyz n2 n2a
eadp n2 n2a
sadi 0.001 n2 c7 n2a c7a
sadi 0.001 n2 c9 n2a c9a
sadi 0.001 c8 c9 c8a c9a
sadi 0.001 n3 c7 n3a c7a
sadi 0.001 n3 c8 n3a c8a
sadi 0.001 n3 c10 n3a c10a
sadi 0.001 c7 c10 c7a c10a
sadi 0.001 c8 c10 c8a c10a
flat 0.001 n2 n3 c7 c8 c9
flat 0.001 n2a n3a c7a c8a c9a
rigu 0.001 n2 n3 c7 c8 c9 c10
rigu 0.001 n2a n3a c7a c8a c9a c10a
eadp cl1 cl1b
eadp cl2 cl2b
eadp cl3 cl3a cl3b
eadp c11 c11a c11b
sadi 0.005 c11 cl1 c11 cl2 c11 cl3 c11a cl1a c11a cl2a c11a cl3a c11b cl1b =
 C11B CL2B C11B CL3B
sadi 0.01 cl1 cl2 cl2 cl3 cl3 cl1 cl1a cl2a cl2a cl3a cl3a cl1a cl1b cl2b =
 CL2B CL3B CL3B CL1B
sump 1.000 0.001 1.000 3 1.000 4 1.000 5
sump 1.000 0.001 1.000 2 1.000 4
WGHT    0.037600    1.049200
EXTI    0.006935
FVAR       0.78031   0.63548   0.52070   0.36454   0.11261
SI1   5    0.249009    0.474284    0.792978    11.00000    0.04170    0.05070 =
         0.04824    0.00025    0.00486    0.00261
O1    4    0.286072    0.539088    0.704725    11.00000    0.05354    0.06796 =
         0.05472    0.01713   -0.00171    0.00130
O2    4    0.476554    0.578478    0.633217    11.00000    0.08607    0.10316 =
         0.05226    0.02033    0.00819   -0.02478
N1    3    0.454838    0.455944    0.806115    11.00000    0.04450    0.06672 =
         0.04257    0.01098    0.00457    0.00615
H1N   2    0.494429    0.415726    0.836740    11.00000    0.04788

C1    1    0.434545    0.539135    0.689900    11.00000    0.06186    0.06149 =
         0.04579    0.00253    0.00280   -0.01231
C2    1    0.553083    0.485901    0.748343    11.00000    0.04570    0.05929 =
         0.04306   -0.00366    0.00876   -0.00349
C3    1    0.628606    0.383224    0.716466    11.00000    0.07021    0.07581 =
         0.07257   -0.01811    0.02163    0.00001
AFIX 137
H3A   2    0.697573    0.345213    0.754831    11.00000   -1.50000
H3B   2    0.692844    0.406218    0.678020    11.00000   -1.50000
H3C   2    0.543461    0.332900    0.696261    11.00000   -1.50000
AFIX   0
C4    1    0.683634    0.570493    0.775268    11.00000    0.06346    0.08619 =
         0.05519   -0.00790    0.00444   -0.02278
AFIX 137
H4A   2    0.633319    0.635959    0.794274    11.00000   -1.50000
H4B   2    0.743008    0.592281    0.734881    11.00000   -1.50000
H4C   2    0.757670    0.537082    0.813787    11.00000   -1.50000
AFIX   0
C5    1    0.105971    0.367710    0.748446    11.00000    0.06125    0.06490 =
         0.06128    0.00006    0.00245   -0.00743
AFIX 137
H5A   2    0.164950    0.299644    0.740231    11.00000   -1.50000
H5B   2    0.056049    0.396384    0.701898    11.00000   -1.50000
H5C   2    0.022604    0.351735    0.780074    11.00000   -1.50000
AFIX   0
C6    1    0.147401    0.602367    0.823511    11.00000    0.06291    0.06344 =
         0.09236   -0.00526    0.01215    0.00847
AFIX 137
H6A   2    0.226866    0.649649    0.851339    11.00000   -1.50000
H6B   2    0.064271    0.581146    0.854089    11.00000   -1.50000
H6C   2    0.098192    0.642957    0.780992    11.00000   -1.50000
AFIX   0
part 1 21
N2    3    0.240605    0.398409    0.891776    21.00000    0.05764    0.05961 =
         0.04195   -0.01009    0.01356   -0.00646
N3    3    0.236577    0.275305    0.979988    21.00000    0.07019    0.10109 =
         0.03677    0.00093    0.01131   -0.00797
C7    1    0.218686    0.292858    0.907651    21.00000    0.06474    0.06197 =
         0.03352   -0.00574    0.00969   -0.00356
AFIX  43
H7    2    0.193512    0.236563    0.872481    21.00000   -1.20000
AFIX   0
C8    1    0.271769    0.374956    1.011917    21.00000    0.17211    0.12735 =
         0.03898   -0.01945    0.01457   -0.03741
AFIX  43
H8    2    0.290924    0.388774    1.062549    21.00000   -1.20000
AFIX   0
C9    1    0.274556    0.451528    0.957949    21.00000    0.16965    0.09624 =
         0.05308   -0.02727    0.01647   -0.03836
AFIX  43
H9    2    0.296117    0.528250    0.964610    21.00000   -1.20000
AFIX   0
C10   1    0.223623    0.166755    1.016595    21.00000    0.12763    0.12515 =
         0.05017    0.02721    0.00240   -0.01690
AFIX 137
H10A  2    0.203633    0.108432    0.979976    21.00000   -1.50000
H10B  2    0.134731    0.169114    1.046720    21.00000   -1.50000
H10C  2    0.323963    0.151131    1.047228    21.00000   -1.50000
AFIX   0
part 2 -21
N2A   3    0.261484    0.413123    0.896957   -21.00000    0.05764    0.05961 =
         0.04195   -0.01009    0.01356   -0.00646
N3A   3    0.261734    0.301617    0.992301   -21.00000    0.09843    0.06847 =
         0.03690    0.00090    0.01448   -0.01892
C7A   1    0.213396    0.316764    0.921106   -21.00000    0.06355    0.05704 =
         0.03435   -0.01697    0.01719   -0.00809
AFIX  43
H7A   2    0.151942    0.264364    0.891671   -21.00000   -1.20000
AFIX   0
C8A   1    0.345951    0.393457    1.015568   -21.00000    0.09974    0.07478 =
         0.03913   -0.00863    0.01122   -0.01838
AFIX  43
H8A   2    0.395276    0.407211    1.063322   -21.00000   -1.20000
AFIX   0
C9A   1    0.345993    0.462099    0.957106   -21.00000    0.08440    0.06719 =
         0.04315   -0.00869    0.00935   -0.01930
AFIX  43
H9A   2    0.396219    0.532602    0.957566   -21.00000   -1.20000
AFIX   0
C10A  1    0.227178    0.203157    1.036037   -21.00000    0.14821    0.08335 =
         0.05973    0.01675    0.03145   -0.02071
AFIX 137
H10D  2    0.160212    0.151048    1.005577   -21.00000   -1.50000
H10E  2    0.170326    0.226427    1.076904   -21.00000   -1.50000
H10F  2    0.328206    0.167065    1.054473   -21.00000   -1.50000
AFIX   0
part 1 31
CL1   6    0.716652    0.800270    0.570536    31.00000    0.08980    0.06293 =
         0.13906   -0.00247    0.01635   -0.00543
CL2   6    0.780086    0.638686    0.462359    31.00000    0.10396    0.14239 =
         0.05441    0.00417    0.00515    0.00778
CL3   6    0.951608    0.626314    0.606827    31.00000    0.07506    0.12621 =
         0.07166    0.02804    0.00426    0.00992
C11   1    0.768523    0.661136    0.555430    31.00000    0.06879    0.06746 =
         0.05663    0.00962    0.00344   -0.00376
AFIX  13
H11   2    0.682336    0.612407    0.571167    31.00000   -1.20000
AFIX   0
part 2 41
CL1A  6    0.757388    0.800263    0.561004    41.00000    0.12352    0.07115 =
         0.12924    0.01677   -0.04461   -0.01858
CL2A  6    0.741230    0.600638    0.472907    41.00000    0.17377    0.12760 =
         0.06850   -0.01628   -0.01754    0.01328
CL3A  6    0.952505    0.609241    0.607767    41.00000    0.07506    0.12621 =
         0.07166    0.02804    0.00426    0.00992
C11A  1    0.768746    0.654431    0.561635    41.00000    0.06879    0.06746 =
         0.05663    0.00962    0.00344   -0.00376
AFIX  13
H11A  2    0.680189    0.625640    0.588418    41.00000   -1.20000
AFIX   0
part 3 51
CL1B  6    0.691296    0.825410    0.572811    51.00000    0.08980    0.06293 =
         0.13906   -0.00247    0.01635   -0.00543
CL2B  6    0.721847    0.657098    0.463996    51.00000    0.10396    0.14239 =
         0.05441    0.00417    0.00515    0.00778
CL3B  6    0.936159    0.656272    0.597671    51.00000    0.07506    0.12621 =
         0.07166    0.02804    0.00426    0.00992
C11B  1    0.740121    0.685916    0.557731    51.00000    0.06879    0.06746 =
         0.05663    0.00962    0.00344   -0.00376
AFIX  13
H11B  2    0.663183    0.637648    0.580818    51.00000   -1.20000
part 0

AFIX   0
HKLF 4


REM  AS102b_01
REM wR2 = 0.1224, GooF = S = 1.160, Restrained GooF = 1.145 for all data
REM R1 = 0.0472 for 2998 Fo > 4sig(Fo) and 0.0562 for all 3543 data
REM 280 parameters refined using 165 restraints

END

WGHT      0.0376      1.0493

REM Highest difference peak  0.188,  deepest hole -0.189,  1-sigma level  0.040
Q1    1   0.2279  0.4398  0.8571  11.00000  0.05    0.19
Q2    1   0.5238  0.5202  0.6314  11.00000  0.05    0.17
Q3    1   0.5031  0.4698  0.7769  11.00000  0.05    0.16
Q4    1   0.6329  0.8057  0.5233  11.00000  0.05    0.16
Q5    1   0.2651  0.5336  0.7345  11.00000  0.05    0.16
Q6    1   0.1414  0.3586  0.6869  11.00000  0.05    0.15
Q7    1   0.3604  0.4584  0.7965  11.00000  0.05    0.15
Q8    1   0.7604  0.6609  0.5027  11.00000  0.05    0.15
Q9    1   0.4182  0.6047  0.6078  11.00000  0.05    0.14
Q10   1   0.7560  0.4722  0.8035  11.00000  0.05    0.14
Q11   1   0.5769  0.4359  0.7362  11.00000  0.05    0.14
Q12   1   0.3560  0.5317  0.7028  11.00000  0.05    0.14
Q13   1   0.5211  0.6140  0.6458  11.00000  0.05    0.14
Q14   1   0.2204  0.3566  0.8987  11.00000  0.05    0.14
Q15   1   0.5047  0.5148  0.7234  11.00000  0.05    0.13
Q16   1   0.1858  0.4098  0.7722  11.00000  0.05    0.13
Q17   1   0.4180  0.5793  0.6453  11.00000  0.05    0.13
Q18   1   0.7114  0.7732  0.5154  11.00000  0.05    0.13
Q19   1   0.0141  0.4438  0.7226  11.00000  0.05    0.12
Q20   1   0.2919  0.4257  0.9150  11.00000  0.05    0.12
;
_shelx_res_checksum   24208

_shelx_hkl_file
;
  -8  -7  -4   12.23    2.47   0
  -8  -6  -5   10.75    3.34   0
  -8  -4  -7    3.46    3.40   0
  -8  -2 -11   39.40    3.90   0
  -7  -8  -1    2.61    2.25   0
  -7  -6  -2    5.74    2.40   0
  -7  -3  -5   16.69    3.11   0
  -7   0 -11  138.18    4.18   0
  -6  -9   1   11.03    3.23   0
  -6  -8   1   35.61    2.24   0
  -6  -6   0  104.64    2.71   0
  -6  -1  -5    4.98    2.17   0
  -6   0  -7    8.58    2.98   0
  -5 -10   3   -3.15    2.30   0
  -5  -7   2   48.24    2.48   0
  -5  -5   1  702.76    4.23   0
  -5  -1  -3  337.21    4.59   0
  -5   3 -13   12.44    5.49   0
  -4 -12   4    1.27    2.33   0
  -4 -11   4   23.74    2.31   0
  -4 -10   4    9.28    1.96   0
  -4   4 -14  123.96    4.22   0
  -3  -7   4  432.36    3.45   0
  -3  -5   3  437.96    3.91   0
  -3   5 -19   16.12    3.39   0
  -3   5 -18   14.81    3.35   0
  -3   5 -17   60.23    3.37   0
  -2 -13   5    9.07    2.43   0
  -2 -12   5   13.32    2.80   0
  -2  -9   5   18.84    3.14   0
  -2  -8   5    4.79    2.08   0
  -2  -4   3 1004.84    5.27   0
  -2   3  -6  253.36    4.71   0
  -2   5 -13   -1.09    2.88   0
  -1 -14   5    2.58    2.40   0
  -1  -7   5  900.07    4.87   0
  -1  -5   4   20.80    2.36   0
  -1   5 -11  576.12    4.68   0
  -1   6 -20    0.59    3.10   0
  -1   6 -19   11.57    2.76   0
   0 -14   5   -0.67    3.16   0
   0  -3   3   -1.07    1.91   0
   0   6 -17    2.44    2.33   0
   0   6 -16   24.12    2.44   0
   1 -14   5    1.19    3.14   0
   1  -7   5 1462.45    7.06   0
   1   0   0   17.72    2.20   0
   1   4  -7   38.89    2.96   0
   1   5 -10  819.61    5.11   0
   1   6 -15   66.26    2.27   0
   2 -14   5    1.96    2.60   0
   2 -13   5    2.52    3.00   0
   2  -5   4    5.16    2.46   0
   2   3  -5 1264.61    5.68   0
   2   5 -10  328.34    3.58   0
   2   6 -16    6.43    2.24   0
   2   6 -15  237.42    3.51   0
   3 -12   5    1.36    2.32   0
   3 -11   5   20.44    2.35   0
   3 -10   5   12.41    2.10   0
   3  -6   4   16.27    3.07   0
   3   1  -2    5.49    2.84   0
   3   4  -8   -1.62    1.98   0
   3   5 -11  241.78    2.89   0
   3   6 -19    5.17    2.24   0
   3   6 -18    1.90    2.28   0
   3   6 -17    0.49    2.13   0
   3   6 -16    1.94    3.01   0
   4 -13   4   21.41    3.51   0
   4  -8   4    7.14    3.54   0
   4   4  -9    2.38    2.15   0
   4   5 -13   -4.81    2.02   0
   4   5 -12   61.59    2.94   0
   4   6 -18   -0.60    2.95   0
   5   1  -4    0.83    2.12   0
   5   3  -8  254.06    2.85   0
   5   5 -15   30.78    2.36   0
   5   5 -14   20.38    3.25   0
   6  -5   1   -0.75    3.03   0
   6   2  -7   -4.47    2.78   0
   6   4 -13   85.37    2.58   0
   6   5 -18    0.55    3.33   0
   7  -4  -1   13.92    3.03   0
   7  -1  -4   13.75    2.24   0
   7   1  -7   14.16    2.44   0
   7   2  -9   27.09    3.08   0
   7   3 -12    0.44    2.27   0
   7   4 -17    4.21    2.60   0
   7   4 -16   19.90    2.39   0
   8  -5  -2   34.83    3.49   0
   8  -1  -6   -3.53    2.11   0
   8   2 -12   35.77    2.41   0
   8   3 -15   13.84    3.11   0
   9  -5  -4    3.95    3.21   0
   9  -4  -5    1.23    2.46   0
   9  -3  -6   30.94    2.59   0
   9  -2  -7    7.71    2.29   0
   9   0 -10   -0.68    3.08   0
  -8  -8  -4   -2.02    2.65   0
  -8  -7  -5    1.45    3.41   0
  -8  -5  -6    4.37    2.73   0
  -8  -3  -9    8.35    2.59   0
  -7 -10  -1    7.38    2.50   0
  -7  -9  -1    0.09    2.46   0
  -7  -7  -2    3.07    2.25   0
  -7  -5  -3   10.70    1.92   0
  -7  -4  -4    5.89    2.17   0
  -7  -2  -7    7.99    3.04   0
  -7  -1  -9   92.16    3.81   0
  -6 -11   1    0.90    2.29   0
  -6 -10   1   39.56    2.39   0
  -6  -7   0    2.82    2.19   0
  -6  -5  -1   -1.37    2.33   0
  -6  -4  -2   44.26    2.92   0
  -6  -3  -3  124.85    3.44   0
  -6  -2  -4   46.76    2.41   0
  -6   1 -10    4.54    3.25   0
  -5 -12   2   11.76    2.30   0
  -5 -11   2    0.91    2.57   0
  -5 -10   2   46.10    3.14   0
  -5  -9   2    8.19    2.45   0
  -5  -8   2   43.67    2.20   0
  -5  -6   1    0.15    2.94   0
  -5  -4   0  120.84    2.54   0
  -5  -3  -1   61.79    2.59   0
  -5  -2  -2   21.99    2.45   0
  -4 -13   3    2.80    2.31   0
  -4 -12   3    0.49    3.16   0
  -4  -8   3  119.09    2.50   0
  -4  -7   3    1.92    2.07   0
  -4  -5   2  264.23    3.19   0
  -4   0  -3   -0.56    2.03   0
  -3 -13   4    3.51    2.39   0
  -3 -12   4   28.87    2.08   0
  -3 -11   4    1.78    2.93   0
  -3 -10   4   35.12    2.97   0
  -3  -9   4   72.09    3.13   0
  -3  -8   4   45.10    2.18   0
  -3   5 -16    4.95    2.93   0
  -2 -14   4    4.16    2.68   0
  -2 -11   5   23.90    2.04   0
  -2 -10   5   39.06    2.22   0
  -2  -6   4   20.18    1.98   0
  -2   5 -12  142.00    3.62   0
  -1 -13   5    0.55    2.22   0
  -1 -12   5   -3.23    2.12   0
  -1 -11   5  105.71    3.06   0
  -1  -9   5  278.04    3.61   0
  -1  -8   5   -0.58    1.98   0
  -1   6 -18   -1.94    2.43   0
  -1   6 -17   10.77    2.11   0
  -1   6 -16   26.81    3.18   0
   0 -13   5   -2.38    2.22   0
   0  -7   5  114.30    2.78   0
   0  -5   4 1458.56    6.52   0
   0   4  -7    7.04    1.81   0
   0   5 -10  321.14    3.42   0
   0   6 -15   15.54    2.00   0
   0   6 -14    9.66    2.72   0
   1 -13   5    9.61    2.27   0
   1   6 -14  342.44    3.29   0
   2 -12   5   11.24    2.48   0
   2 -11   5    2.58    2.87   0
   2  -9   5   17.05    3.04   0
   2  -8   5   49.99    2.41   0
   2   2  -3 3497.85   10.23   0
   2   4  -7  327.07    3.11   0
   2   6 -14   66.64    2.35   0
   3   3  -5   69.77    2.65   0
   3   5 -10   19.27    2.82   0
   3   6 -15    4.59    2.31   0
   3   6 -14   -3.71    2.71   0
   4 -12   4    0.56    3.20   0
   4   2  -4   88.78    2.99   0
   4   3  -6  136.77    2.59   0
   4   4  -8  553.48    4.09   0
   4   5 -11    8.63    2.91   0
   4   6 -17    2.46    2.56   0
   4   6 -16   -2.85    2.11   0
   5  -2   0 1217.02    7.94   0
   5  -1  -1    0.01    2.15   0
   5   2  -5   28.39    3.35   0
   5   3  -7   60.97    2.26   0
   5   4 -10  198.79    2.85   0
   5   5 -13  167.45    2.67   0
   6   1  -5  148.90    2.70   0
   6   3  -9   80.55    2.60   0
   6   4 -12   16.72    2.20   0
   6   4 -11   48.07    2.72   0
   6   5 -17    7.33    2.40   0
   6   5 -16   16.07    2.37   0
   6   5 -15    7.41    2.95   0
   7   0  -5   40.28    2.35   0
   7   3 -11   12.66    2.49   0
   7   4 -15   49.34    2.70   0
   7   4 -14    0.29    3.11   0
   8   0  -7   -0.52    2.42   0
   8   1  -9   52.84    2.54   0
   8   2 -11   20.87    2.29   0
   8   3 -14   -4.13    2.50   0
   9  -6  -3    6.25    2.86   0
   9  -1  -8   52.96    2.72   0
  -8  -8  -5   -1.74    2.75   0
  -8  -7  -6   21.89    3.55   0
  -8  -6  -6   -5.06    2.53   0
  -8  -5  -7   51.10    3.09   0
  -8  -4  -8   -1.46    2.63   0
  -8  -3 -10    7.19    3.20   0
  -7 -10  -2   14.17    2.44   0
  -7  -9  -2   -2.69    2.42   0
  -7  -8  -2   18.12    2.21   0
  -7  -6  -3   71.62    2.74   0
  -7  -5  -4   37.55    2.99   0
  -7  -4  -5   10.45    2.90   0
  -7  -3  -6  108.51    3.38   0
  -7   0 -12    3.03    2.98   0
  -6 -11   0   -1.42    2.29   0
  -6  -9   0    9.52    2.28   0
  -6  -8   0   17.15    1.99   0
  -6  -6  -1   57.97    2.63   0
  -6  -1  -6   36.63    3.42   0
  -5  -7   1   58.72    3.15   0
  -5  -5   0  111.02    3.33   0
  -5   0  -5   95.21    2.85   0
  -5   1  -7   65.63    3.63   0
  -4 -11   3    2.54    2.16   0
  -4 -10   3    0.60    2.00   0
  -4  -9   3   81.54    2.34   0
  -4  -6   2   51.36    2.24   0
  -4  -4   1   25.81    1.98   0
  -4  -3   0  596.93    4.46   0
  -4  -1  -2 1393.04    7.34   0
  -4   4 -13   22.72    3.27   0
  -3 -14   3   10.16    2.47   0
  -3  -6   3  513.73    3.66   0
  -3  -4   2   45.55    1.97   0
  -3   4 -10  126.27    3.90   0
  -3   5 -15    8.25    2.26   0
  -2 -13   4   21.12    2.19   0
  -2 -12   4   -4.10    2.86   0
  -2  -7   4    2.24    2.09   0
  -2  -3   2 1078.90    5.68   0
  -2   0  -1  329.39    5.79   0
  -2   6 -19    9.18    2.88   0
  -1 -14   4    5.08    2.13   0
  -1 -10   5   96.15    2.44   0
  -1  -6   4  263.20    3.41   0
  -1   3  -5  318.94    4.36   0
  -1   5 -10  285.01    3.91   0
  -1   6 -15    0.58    2.01   0
   0 -12   5   33.04    2.30   0
   0 -11   5   17.84    2.01   0
   0 -10   5   86.34    2.91   0
   0  -9   5    6.95    2.07   0
   0  -8   5   16.21    1.89   0
   0   6 -13    1.60    3.00   0
   1 -12   5    2.22    2.24   0
   1 -11   5   98.05    2.88   0
   1 -10   5   54.19    2.90   0
   1  -9   5  237.23    3.45   0
   1  -8   5  531.96    4.05   0
   1  -5   4   72.61    2.28   0
   1   5  -9    3.15    2.24   0
   1   6 -13  127.34    2.59   0
   2 -14   4    0.77    3.39   0
   2 -10   5   -0.58    2.10   0
   2  -1   1  606.51    9.34   0
   2   5  -9   24.50    2.30   0
   2   6 -13  107.69    2.42   0
   3 -13   4   19.42    2.93   0
   3   2  -3   27.55    2.72   0
   3   4  -7    9.87    2.06   0
   3   6 -13  133.49    2.53   0
   4 -11   4   20.38    2.23   0
   4 -10   4   10.18    2.84   0
   4  -9   4  204.92    4.15   0
   4  -1   0  397.53    4.40   0
   4   0  -1   10.39    2.83   0
   4   5 -10    8.08    2.57   0
   4   6 -15   12.29    2.25   0
   4   6 -14   20.74    3.06   0
   5 -12   3   18.27    3.20   0
   5   0  -2    1.03    2.12   0
   5   4  -9  400.26    3.33   0
   5   5 -12   92.42    2.43   0
   5   6 -18   20.33    2.32   0
   5   6 -17    4.74    2.29   0
   5   6 -16    0.29    3.06   0
   6  -3   0  108.38    3.55   0
   6  -2  -1  787.94    5.43   0
   6  -1  -2   19.12    2.19   0
   6   0  -3   21.73    2.87   0
   6   2  -6   16.82    2.13   0
   6   3  -8  218.37    3.02   0
   6   5 -14   11.56    2.00   0
   7  -5   0    1.97    2.58   0
   7   1  -6  268.76    3.21   0
   7   2  -8    0.39    2.10   0
   7   3 -10   42.11    2.23   0
   7   4 -13   25.38    2.27   0
   8  -6  -1   13.73    2.76   0
   8  -3  -3   16.17    2.21   0
   8  -2  -4   18.98    2.25   0
   8  -1  -5    8.59    2.08   0
   8   1  -8   13.71    2.36   0
   8   2 -10   32.08    2.19   0
   8   3 -13   10.74    2.41   0
   9  -4  -4    5.57    3.24   0
   9  -3  -5    2.98    2.23   0
   9  -2  -6   -1.12    2.43   0
   9  -1  -7    3.84    3.36   0
   9   1 -11    3.26    2.40   0
  -8  -6  -7   29.11    2.72   0
  -8  -5  -8   33.27    2.79   0
  -8  -4  -9   23.02    2.73   0
  -8  -3 -11   -2.05    3.47   0
  -7 -10  -3    0.54    2.86   0
  -7  -9  -3   -2.21    2.90   0
  -7  -8  -3    6.47    2.39   0
  -7  -7  -3   13.41    2.27   0
  -7  -6  -4   38.37    3.35   0
  -7  -2  -8    5.14    3.22   0
  -7  -1 -10    9.86    3.32   0
  -6 -11  -1   11.87    2.98   0
  -6  -8  -1   -2.48    3.04   0
  -6  -7  -1   27.33    2.18   0
  -6  -5  -2    5.58    2.08   0
  -6   0  -8   27.30    3.31   0
  -5 -12   1   11.22    2.15   0
  -5 -11   1    3.46    2.14   0
  -5 -10   1   57.60    2.43   0
  -5  -9   1   10.92    1.96   0
  -5  -8   1   13.63    2.12   0
  -5  -4  -1  456.38    4.13   0
  -4 -13   2   -3.70    2.21   0
  -4 -12   2    4.58    2.25   0
  -4 -11   2   64.96    3.02   0
  -4  -8   2   11.89    2.92   0
  -4  -7   2   77.31    2.39   0
  -4  -5   1   16.10    2.97   0
  -4  -2  -1   92.92    2.69   0
  -4   1  -5  797.79    7.89   0
  -3 -13   3    9.27    2.27   0
  -3 -12   3    1.72    1.94   0
  -3 -11   3    9.20    2.87   0
  -3  -8   3  206.01    3.41   0
  -3  -7   3  116.45    2.44   0
  -3  -3   1  153.27    2.52   0
  -3   0  -2    1.77    2.00   0
  -3   5 -14    7.29    2.73   0
  -2 -14   3   23.65    2.37   0
  -2 -11   4   31.24    2.01   0
  -2 -10   4   15.30    2.03   0
  -2  -9   4  705.21    3.98   0
  -2  -8   4   64.25    2.30   0
  -2  -5   3 1009.08    4.74   0
  -2  -2   1 7814.46   15.85   0
  -2  -1   0 1026.71    7.21   0
  -2   4  -8   11.78    2.77   0
  -2   5 -11   27.98    2.93   0
  -2   6 -18   -6.22    2.30   0
  -2   6 -17   32.47    3.40   0
  -1 -13   4   10.45    2.16   0
  -1  -4   3  830.54    4.91   0
  -1   4  -7    0.65    1.89   0
  -1   6 -14   20.88    2.20   0
   0 -14   4   -1.18    2.26   0
   0  -1   1  183.34    4.96   0
   0   5  -9   45.04    2.41   0
   0   6 -12    6.45    2.70   0
   0   7 -19    7.06    2.74   0
   1 -14   4   -4.51    2.28   0
   1   1  -1  549.86    6.18   0
   1   3  -4  189.99    3.11   0
   1   4  -6  491.08    3.68   0
   1   6 -12  220.37    2.82   0
   1   7 -20   13.23    2.61   0
   1   7 -19   19.37    2.26   0
   1   7 -18    2.05    2.40   0
   1   7 -17  190.89    3.54   0
   2 -13   4   20.92    3.30   0
   2  -6   4   23.08    2.95   0
   2   3  -4  316.45    3.84   0
   2   4  -6   64.47    2.24   0
   2   6 -12   73.21    2.39   0
   2   7 -19   -3.94    2.24   0
   2   7 -18   15.38    2.38   0
   2   7 -17    4.49    2.13   0
   3 -12   4    0.51    2.72   0
   3  -7   4   61.53    3.23   0
   3   5  -9  105.06    2.38   0
   3   6 -12   63.05    2.34   0
   3   7 -19    5.30    2.17   0
   3   7 -18    1.00    2.17   0
   3   7 -17   62.02    3.21   0
   4   1  -2 1117.93    5.49   0
   4   3  -5  263.01    2.96   0
   4   4  -7    7.05    2.15   0
   4   6 -13   12.50    1.89   0
   5 -11   3   47.58    3.43   0
   5  -8   3    1.21    3.21   0
   5  -3   1   58.55    3.57   0
   5   1  -3   31.30    2.28   0
   5   3  -6  261.08    2.91   0
   5   4  -8   57.82    2.28   0
   5   5 -11   -0.73    1.98   0
   5   6 -15   15.25    2.13   0
   5   6 -14  202.02    3.38   0
   6   1  -4  104.88    2.52   0
   6   4 -10   19.40    2.21   0
   6   5 -13   34.49    2.29   0
   6   6 -17    4.21    3.20   0
   7  -2  -2   42.04    2.34   0
   7  -1  -3    0.86    2.13   0
   7   0  -4   -1.28    2.97   0
   7   2  -7    9.33    1.99   0
   7   3  -9   23.29    2.14   0
   7   4 -12   30.02    2.29   0
   7   5 -16    9.12    2.38   0
   7   5 -15    5.48    3.23   0
   8  -4  -2   25.09    2.56   0
   8   0  -6   96.52    2.50   0
   8   1  -7   70.92    3.04   0
   8   2  -9   41.55    3.01   0
   8   3 -12   10.93    2.30   0
   8   3 -11   14.21    2.87   0
   8   4 -14   11.59    2.94   0
   9  -5  -3   15.20    2.95   0
   9   0  -8    2.73    2.32   0
   9   1 -10   34.44    2.56   0
   9   2 -12    4.41    2.53   0
  -8  -7  -7   -3.28    2.98   0
  -8  -6  -8    8.27    2.56   0
  -8  -5  -9   11.29    3.36   0
  -8  -4 -10    9.04    2.82   0
  -7 -10  -4   25.70    3.53   0
  -7  -8  -4   -1.83    3.29   0
  -7  -7  -4    1.05    2.10   0
  -7  -5  -5   32.67    2.60   0
  -7  -4  -6   13.91    2.92   0
  -7  -3  -7  105.81    2.97   0
  -7   0 -13   13.17    3.22   0
  -6 -10  -1   24.92    2.53   0
  -6  -9  -1    2.57    2.18   0
  -6  -6  -2   26.10    2.13   0
  -6  -4  -3   13.92    2.35   0
  -6  -3  -4  495.10    4.12   0
  -6  -2  -5  126.70    2.73   0
  -5 -12   0   24.93    2.28   0
  -5  -7   0    4.70    3.01   0
  -5  -6   0   63.12    2.26   0
  -5  -3  -2   34.25    2.28   0
  -5  -2  -3  135.87    3.39   0
  -5  -1  -4  132.01    2.97   0
  -4 -13   1   12.65    2.33   0
  -4 -10   2   11.39    1.96   0
  -4  -9   2   10.94    1.97   0
  -3 -14   2    8.99    2.47   0
  -3 -13   2   -1.57    2.72   0
  -3 -10   3   28.24    2.07   0
  -3  -9   3   90.07    2.36   0
  -3  -5   2    9.96    1.90   0
  -3  -2   0  510.84    4.11   0
  -3  -1  -1  193.84    3.24   0
  -3   3  -7  156.46    5.50   0
  -3   5 -13    6.46    2.73   0
  -2 -13   3    3.68    2.15   0
  -2  -6   3   54.46    2.52   0
  -2   6 -16    7.03    2.19   0
  -2   6 -15    8.72    2.78   0
  -1 -14   3    3.06    2.08   0
  -1 -12   4    2.80    2.17   0
  -1 -11   4    6.52    1.84   0
  -1 -10   4   36.40    3.22   0
  -1  -9   4   37.73    2.82   0
  -1  -8   4   45.27    2.21   0
  -1  -7   4    8.90    2.02   0
  -1   2  -3    2.39    2.02   0
  -1   5  -9   39.15    2.89   0
  -1   6 -13   30.51    2.26   0
   0 -13   4   23.77    2.16   0
   0 -12   4   16.56    2.87   0
   0  -6   4  536.13    3.89   0
   0   3  -4 1065.68    6.74   0
   0   4  -6   86.02    2.29   0
   0   7 -18    4.39    2.43   0
   0   7 -17   21.14    2.31   0
   1 -13   4   29.61    2.42   0
   1  -6   4   27.22    2.67   0
   1   5  -8  249.15    3.13   0
   1   6 -11    0.49    2.07   0
   1   7 -16    4.02    2.23   0
   1   7 -15   17.89    3.03   0
   2 -12   4    4.27    3.02   0
   2   1  -1 2809.36   10.74   0
   2   5  -8   15.86    2.20   0
   2   6 -11   23.19    2.06   0
   2   7 -16   11.88    2.31   0
   2   7 -15   10.17    2.25   0
   3 -11   4    2.99    2.67   0
   3  -8   4   91.05    3.25   0
   3   3  -4   19.47    2.44   0
   3   4  -6  227.95    2.76   0
   3   5  -8    9.05    2.92   0
   3   6 -11   41.47    2.26   0
   3   7 -16   30.65    2.12   0
   3   7 -15   67.57    3.15   0
   4 -13   3    4.57    3.02   0
   4   2  -3 1587.10    6.49   0
   4   5  -9    4.47    2.16   0
   4   6 -12   15.26    2.05   0
   4   7 -18    8.04    2.29   0
   4   7 -17   23.50    2.40   0
   4   7 -16   75.86    3.47   0
   5 -10   3   11.99    3.11   0
   5  -9   3    8.92    2.72   0
   5   2  -4    1.89    2.21   0
   5   5 -10   48.91    2.29   0
   5   6 -13   35.82    2.45   0
   6 -11   2    6.34    3.10   0
   6   2  -5   18.04    2.17   0
   6   3  -7  577.01    3.87   0
   6   4  -9   13.14    2.22   0
   6   5 -12    5.58    2.32   0
   6   5 -11    3.64    2.72   0
   6   6 -16   -3.48    2.27   0
   6   6 -15   78.97    3.52   0
   7 -10   1    0.68    4.09   0
   7  -3  -1   31.80    2.36   0
   7   1  -5   -0.11    2.11   0
   7   3  -8  157.41    3.19   0
   7   4 -11    5.36    2.16   0
   7   5 -14   12.15    2.35   0
   8  -1  -4   20.35    2.57   0
   8   4 -13   18.32    2.32   0
   9  -7  -2    3.96    4.00   0
   9  -3  -4   42.94    3.21   0
   9  -2  -5    3.91    3.15   0
   9  -1  -6  105.99    3.77   0
   9   1  -9    8.00    2.37   0
   9   2 -11   26.73    2.42   0
  -7  -9  -4   -4.06    2.33   0
  -7  -7  -5   32.94    3.13   0
  -7  -6  -5   -4.15    2.40   0
  -7  -5  -6   20.58    3.32   0
  -7  -2  -9   14.04    2.91   0
  -7  -1 -11   16.62    3.36   0
  -7   0 -14   -2.93    3.42   0
  -6 -11  -2    3.43    2.28   0
  -6 -10  -2   17.52    2.30   0
  -6  -9  -2   11.10    2.21   0
  -6  -8  -2   42.08    2.35   0
  -6  -7  -2    4.72    2.04   0
  -6  -5  -3    9.75    2.15   0
  -6  -1  -7   34.61    3.19   0
  -6   1 -11   49.12    3.51   0
  -5 -11   0   -1.05    2.07   0
  -5 -10   0   53.72    2.42   0
  -5  -9   0    0.68    1.92   0
  -5  -8   0   31.13    2.14   0
  -5  -5  -1   68.00    2.41   0
  -4 -12   1   64.43    2.59   0
  -4 -11   1    6.88    2.58   0
  -4  -7   1  323.72    3.67   0
  -4  -6   1  548.96    3.62   0
  -4  -4   0  364.52    3.32   0
  -4   2  -7  674.71   11.13   0
  -3 -14   1    1.77    2.36   0
  -3 -12   2   67.41    2.15   0
  -3 -11   2   -0.11    2.63   0
  -3  -6   2   21.93    2.13   0
  -3  -4   1  212.51    3.10   0
  -2 -14   2    5.79    2.20   0
  -2 -12   3    1.73    1.88   0
  -2 -11   3   14.49    1.90   0
  -2 -10   3   29.05    2.98   0
  -2  -7   3  521.98    3.81   0
  -2  -4   2 1639.67    6.31   0
  -1 -13   3    5.34    2.09   0
  -1  -5   3    9.68    1.75   0
  -1  -3   2  413.77    4.17   0
  -1   6 -12   74.14    3.27   0
  -1   7 -19    3.26    2.30   0
  -1   7 -18    0.33    3.05   0
   0 -14   3   28.32    2.23   0
   0 -11   4    3.99    1.97   0
   0 -10   4   38.27    2.87   0
   0  -9   4  993.00    5.20   0
   0  -8   4   29.00    2.73   0
   0  -7   4  532.79    3.97   0
   0  -4   3 1037.21    5.78   0
   0   5  -8   49.25    2.32   0
   0   6 -11   20.91    2.17   0
   0   7 -16  137.79    2.83   0
   0   7 -15   73.10    3.22   0
   1 -14   3   12.52    2.63   0
   1 -12   4    2.58    2.15   0
   1 -11   4   12.50    2.68   0
   1  -7   4  239.21    3.95   0
   1   6 -10   88.15    3.00   0
   1   7 -14   19.70    1.98   0
   2 -14   3   20.30    2.78   0
   2 -11   4    5.27    2.40   0
   2  -7   4   85.21    3.27   0
   2  -4   3  353.87    5.19   0
   2   2  -2 2177.90    8.43   0
   2   6 -10    2.70    2.07   0
   2   7 -14    9.41    2.04   0
   3 -10   4   90.41    2.65   0
   3  -9   4    7.73    2.20   0
   3   0   0   -0.94    2.63   0
   3   6 -10   75.77    2.96   0
   3   7 -14    0.35    2.16   0
   4 -12   3    4.95    3.05   0
   4   4  -6   68.86    2.37   0
   4   5  -8    5.61    2.72   0
   4   6 -11    3.30    1.99   0
   4   7 -15   12.96    2.00   0
   5   3  -5   72.70    2.47   0
   5   4  -7  124.04    2.53   0
   5   5  -9  111.40    2.47   0
   5   6 -12   16.46    2.12   0
   5   7 -17   26.82    2.37   0
   6 -10   2   14.02    3.53   0
   6  -8   2   44.86    4.59   0
   6   0  -2  143.35    3.15   0
   6   3  -6   58.71    2.97   0
   6   4  -8   -1.58    2.13   0
   6   6 -14   17.78    2.25   0
   7  -9   1    4.45    4.64   0
   7   2  -6   30.79    2.51   0
   7   4 -10   35.62    2.41   0
   7   5 -13   -1.95    2.15   0
   7   5 -12    1.82    2.81   0
   8  -5  -1    5.88    3.03   0
   8  -3  -2    8.04    2.55   0
   8  -2  -3   25.86    2.05   0
   8   0  -5    1.81    1.93   0
   8   1  -6   -1.39    2.73   0
   8   2  -8   28.28    2.31   0
   8   3 -10    1.41    2.13   0
   8   4 -12   -0.98    2.34   0
   9  -4  -3   18.72    2.92   0
   9   0  -7   49.48    2.59   0
   9   1  -8   57.28    3.36   0
   9   2 -10   -2.77    2.29   0
   9   3 -12   -4.86    2.68   0
  -7  -9  -5   14.34    2.48   0
  -7  -8  -5    0.16    2.55   0
  -7  -6  -6   -1.75    3.21   0
  -7  -4  -7    3.14    2.43   0
  -7  -3  -8   14.29    2.46   0
  -6 -11  -3   13.37    2.36   0
  -6 -10  -3   -0.32    3.07   0
  -6  -7  -3   13.55    2.83   0
  -6  -6  -3   23.92    2.18   0
  -6  -4  -4  102.70    2.79   0
  -6  -3  -5   33.06    2.46   0
  -6  -2  -6    3.74    2.35   0
  -6   0  -9    2.16    3.03   0
  -6   2 -15    0.78    4.45   0
  -5 -12  -1   10.98    2.25   0
  -5 -11  -1    5.04    2.22   0
  -5 -10  -1    0.13    2.96   0
  -5  -7  -1    0.17    2.95   0
  -5  -6  -1   -1.21    2.04   0
  -5  -4  -2   22.71    2.08   0
  -5   0  -6   -1.17    2.80   0
  -4 -13   0    7.71    2.18   0
  -4 -10   1   19.88    1.94   0
  -4  -9   1    2.92    2.03   0
  -4  -8   1   53.71    2.18   0
  -4  -5   0   52.13    3.25   0
  -4  -3  -1  167.69    2.75   0
  -4   0  -4 1166.18    7.56   0
  -4   4 -12   69.69    4.32   0
  -4   5 -18   13.41    3.47   0
  -3 -13   1    1.36    2.32   0
  -3 -10   2  133.26    2.43   0
  -3  -9   2    1.04    2.06   0
  -3  -8   2   66.67    2.25   0
  -3  -7   2    6.67    2.03   0
  -2 -13   2    9.25    2.13   0
  -2  -9   3   56.22    2.17   0
  -2  -8   3  300.94    2.83   0
  -2   5 -10  505.29    4.57   0
  -2   6 -14  161.95    3.05   0
  -1 -14   2   -0.13    2.10   0
  -1 -12   3   47.99    2.28   0
  -1 -11   3   30.91    2.76   0
  -1  -6   3 1516.47    5.99   0
  -1   7 -17   28.55    2.51   0
  -1   7 -16   11.08    2.88   0
   0 -13   3    2.56    1.96   0
   0   6 -10   35.07    2.74   0
   0   7 -14  155.87    3.36   0
   1 -13   3   28.15    3.02   0
   1 -10   4    2.85    2.04   0
   1  -9   4  238.26    2.96   0
   1  -8   4   -0.55    1.81   0
   1  -4   3  433.52    4.59   0
   1   2  -2 3283.75   11.76   0
   1   4  -5  549.48    3.97   0
   1   5  -7 1936.37    6.65   0
   1   7 -13   83.50    2.24   0
   1   8 -19    0.59    2.97   0
   2 -13   3   -2.55    2.84   0
   2 -10   4   22.10    2.10   0
   2  -9   4  256.00    3.45   0
   2  -8   4   24.99    2.12   0
   2   4  -5  186.34    2.51   0
   2   5  -7 1626.14    5.95   0
   2   6  -9  233.79    3.21   0
   2   7 -13    3.54    1.98   0
   2   8 -18    1.58    2.97   0
   3 -13   3   16.73    2.37   0
   3   1  -1  211.07    3.19   0
   3   2  -2  343.41    3.88   0
   3   4  -5   -0.54    1.75   0
   3   5  -7  269.52    3.14   0
   3   7 -13    8.61    1.92   0
   3   8 -18   -2.55    3.01   0
   4   3  -4 1641.08    5.99   0
   4   6 -10    5.81    2.19   0
   4   7 -14   53.81    2.31   0
   4   7 -13    5.98    2.85   0
   5  -1   0  122.67    3.45   0
   5   0  -1  158.33    2.96   0
   5   1  -2   12.24    2.15   0
   5   6 -11    3.59    1.88   0
   5   7 -15   28.97    2.28   0
   5   7 -14   29.76    2.65   0
   6  -9   2    4.62    3.43   0
   6  -4   1   93.08    3.70   0
   6  -1  -1  267.35    3.43   0
   6   1  -3  205.89    2.87   0
   6   2  -4   24.03    2.76   0
   6   5 -10   33.35    2.10   0
   6   6 -13   36.69    2.02   0
   6   7 -16   31.61    2.99   0
   7  -4   0   16.41    2.82   0
   7  -1  -2   46.18    3.17   0
   7   0  -3   37.39    2.36   0
   7   1  -4   11.44    2.88   0
   7   3  -7    3.44    2.06   0
   7   4  -9    1.31    2.00   0
   7   5 -11   -5.95    2.85   0
   7   6 -15   -0.44    2.43   0
   7   6 -14   61.04    3.06   0
   8   2  -7   46.45    2.45   0
   8   3  -9    9.89    2.18   0
   8   4 -11   20.84    2.44   0
   9  -6  -2    9.94    3.17   0
   9  -1  -5    5.49    3.01   0
   9   0  -6   -0.25    2.59   0
   9   2  -9   27.26    2.46   0
   9   3 -11    0.06    2.16   0
  10  -1  -7   12.64    3.06   0
  -7  -9  -6   -7.00    2.48   0
  -7  -8  -6   -0.48    2.50   0
  -7  -7  -6   41.07    2.67   0
  -7  -5  -7   20.28    2.64   0
  -7  -4  -8   12.12    3.19   0
  -7  -3  -9   21.95    3.36   0
  -7  -2 -10    5.08    2.18   0
  -7  -1 -12   13.01    3.20   0
  -6 -11  -4   12.05    3.12   0
  -6  -9  -3    3.08    2.02   0
  -6  -8  -3   29.70    2.22   0
  -6  -5  -4   24.70    2.42   0
  -5 -12  -2   22.86    2.26   0
  -5  -9  -1   21.24    2.00   0
  -5  -8  -1   72.80    2.22   0
  -5  -5  -2    7.68    2.66   0
  -5  -3  -3  186.92    2.83   0
  -5  -2  -4  196.66    3.73   0
  -5  -1  -5  102.28    3.38   0
  -4 -13  -1    1.89    2.22   0
  -4 -11   0    8.84    2.10   0
  -4 -10   0   12.25    2.71   0
  -4  -6   0  171.24    2.68   0
  -4  -2  -2 2365.43    7.98   0
  -4  -1  -3  998.06    6.22   0
  -4   5 -17   24.53    3.29   0
  -3 -14   0   37.31    2.51   0
  -3 -12   1    5.63    2.04   0
  -3 -11   1    6.86    2.73   0
  -3  -5   1  294.69    2.85   0
  -3  -3   0    2.40    1.70   0
  -3   4  -9   32.42    2.87   0
  -3   5 -12  231.12    4.50   0
  -3   6 -18    1.10    2.33   0
  -3   6 -17    2.73    2.99   0
  -2 -14   1   17.77    2.16   0
  -2 -12   2    0.72    1.95   0
  -2 -11   2  130.76    3.01   0
  -2  -5   2  163.84    2.41   0
  -2  -3   1 1168.59    5.89   0
  -2   6 -13   41.96    3.17   0
  -1 -13   2    4.33    1.94   0
  -1 -10   3    5.75    1.93   0
  -1  -9   3  238.31    3.44   0
  -1  -8   3   42.21    2.76   0
  -1  -7   3  100.69    2.48   0
  -1   4  -6  132.52    2.80   0
  -1   5  -8  127.16    3.44   0
  -1   6 -11  121.93    2.62   0
  -1   7 -15    7.08    3.07   0
   0 -14   2   12.68    2.09   0
   0 -12   3    6.64    2.03   0
   0  -5   3   27.75    1.90   0
   0   1  -1  166.33    4.69   0
   0   5  -7  615.09    4.79   0
   0   7 -13    1.58    2.75   0
   1 -12   3   31.70    3.00   0
   1   6  -9  102.76    2.38   0
   1   7 -12   16.12    2.14   0
   1   8 -18    2.07    2.21   0
   1   8 -17   -4.09    3.26   0
   2   3  -3 1413.52    6.24   0
   2   7 -12   72.71    2.26   0
   2   8 -17    4.64    2.29   0
   2   8 -16    4.64    3.05   0
   3 -12   3   16.10    2.53   0
   3  -1   1  177.32    3.86   0
   3   6  -9   31.27    2.15   0
   3   7 -12   68.42    2.42   0
   3   8 -17   12.05    2.36   0
   3   8 -16   -1.37    2.17   0
   4 -11   3    5.62    2.18   0
   4  -6   3    6.73    2.55   0
   4   4  -5   21.79    2.91   0
   4   5  -7    5.30    2.02   0
   4   6  -9    3.91    2.69   0
   4   7 -12    5.82    1.91   0
   4   8 -17   -1.87    2.27   0
   4   8 -16    1.69    2.72   0
   5 -12   2   14.21    3.05   0
   5   2  -3    6.55    2.05   0
   5   4  -6    2.82    2.08   0
   5   5  -8   23.56    2.09   0
   5   6 -10   13.01    1.93   0
   5   7 -13   28.03    2.33   0
   6  -2   0   80.81    3.26   0
   6   3  -5  253.75    3.53   0
   6   4  -7   48.00    2.33   0
   6   5  -9   59.52    2.39   0
   6   6 -11   27.12    3.09   0
   6   7 -15    4.77    2.39   0
   7  -2  -1  200.92    3.98   0
   7   2  -5    4.30    2.09   0
   7   4  -8   27.77    2.74   0
   7   5 -10    2.14    2.90   0
   7   6 -13   21.67    2.42   0
   8  -1  -3   22.24    2.76   0
   8   0  -4   -0.23    1.97   0
   8   1  -5    6.49    2.75   0
   8   3  -8   11.28    2.16   0
   8   4 -10   55.10    2.51   0
   8   5 -13    2.24    2.31   0
   8   5 -12    0.03    2.56   0
   9  -2  -4    6.48    2.06   0
   9   1  -7    7.86    2.30   0
   9   3 -10    0.06    2.99   0
  10  -2  -6    0.36    2.43   0
  -7  -9  -7   28.73    2.88   0
  -7  -8  -7   -7.57    2.55   0
  -7  -7  -7   -6.61    2.71   0
  -7  -6  -7    2.97    2.23   0
  -7  -5  -8   34.95    3.12   0
  -7  -2 -11    5.02    3.25   0
  -7  -1 -13    4.30    3.52   0
  -6 -10  -4    4.80    2.45   0
  -6  -9  -4   46.45    2.43   0
  -6  -8  -4    2.22    2.28   0
  -6  -7  -4   -2.44    1.94   0
  -6  -6  -4   56.72    2.42   0
  -6  -4  -5   39.42    2.49   0
  -6  -3  -6    7.57    3.07   0
  -6  -2  -7   17.19    3.06   0
  -6  -1  -8   18.88    2.39   0
  -6   1 -12   10.84    3.72   0
  -5 -12  -3   26.74    3.18   0
  -5 -11  -2   -1.24    2.36   0
  -5 -10  -2   15.19    2.19   0
  -5  -9  -2    6.77    2.62   0
  -5  -8  -2    6.86    2.71   0
  -5  -7  -2   60.00    3.01   0
  -5  -6  -2  176.41    2.65   0
  -5  -4  -3    2.11    2.58   0
  -5   1  -8  888.48    7.86   0
  -5   2 -10  321.15    6.95   0
  -4 -12  -1   45.78    2.45   0
  -4  -9   0    9.92    1.96   0
  -4  -8   0   54.64    2.27   0
  -4  -7   0   64.81    2.27   0
  -4  -4  -1  234.02    3.00   0
  -4   5 -16   50.15    3.78   0
  -3 -14  -1   12.48    3.01   0
  -3 -13   0   -6.11    2.28   0
  -3 -10   1   -4.86    1.92   0
  -3  -9   1   65.84    2.79   0
  -3  -8   1  212.70    3.45   0
  -3  -7   1   23.98    2.87   0
  -3  -6   1   51.25    2.09   0
  -3  -2  -1  169.85    3.30   0
  -3   6 -16    8.18    2.97   0
  -2 -14   0    5.63    2.92   0
  -2 -10   2   47.02    2.19   0
  -2  -9   2    3.85    1.95   0
  -2  -8   2    2.84    2.70   0
  -2  -7   2  641.55    4.02   0
  -2  -6   2   11.69    1.81   0
  -2   4  -7    0.75    2.55   0
  -2   7 -18   54.45    3.45   0
  -1 -14   1   10.60    2.15   0
  -1 -12   2   14.33    2.24   0
  -1  -4   2  555.77    4.24   0
  -1  -2   1 3765.73   12.69   0
  -1   7 -14   35.64    2.93   0
   0 -13   2   -1.79    2.44   0
   0 -11   3    7.87    1.94   0
   0 -10   3  186.77    3.51   0
   0  -6   3 1491.60    6.45   0
   0  -3   2 1161.72    7.22   0
   0   4  -5  416.18    3.84   0
   0   6  -9  268.10    3.57   0
   0   7 -12    0.03    2.71   0
   0   8 -18   -2.24    2.25   0
   0   8 -17    0.22    2.80   0
   1 -14   2    6.98    2.04   0
   1 -11   3   57.09    2.86   0
   1   3  -3 2505.85    9.01   0
   1   7 -11   34.03    2.94   0
   1   8 -16   -0.59    2.00   0
   1   8 -15    8.40    2.67   0
   2 -14   2    0.78    2.34   0
   2 -12   3    6.28    2.03   0
   2   5  -6  125.42    2.41   0
   2   6  -8  331.74    3.13   0
   2   7 -11    0.32    2.00   0
   2   8 -15   16.13    2.13   0
   3 -11   3   86.34    3.39   0
   3  -5   3  699.62    7.16   0
   3   3  -3 1048.65    4.91   0
   3   5  -6 1479.19    5.59   0
   3   6  -8   65.14    2.90   0
   3   7 -11  161.50    2.66   0
   3   8 -15    0.91    2.02   0
   3   8 -14   11.99    2.67   0
   4 -13   2   10.68    2.22   0
   4 -10   3   14.07    1.98   0
   4  -9   3   43.16    3.08   0
   4  -3   2  350.73    8.13   0
   4   1  -1  225.22    2.99   0
   4   2  -2 1721.44    6.54   0
   4   7 -11   11.63    2.74   0
   4   8 -15    8.55    2.35   0
   5   3  -4  410.21    3.42   0
   5   5  -7  417.86    3.30   0
   5   6  -9  136.41    3.17   0
   5   7 -12   16.40    2.19   0
   5   8 -16    0.58    2.23   0
   6   4  -6  194.16    3.60   0
   6   5  -8   65.45    2.28   0
   6   6 -10   25.23    2.72   0
   6   7 -14   41.14    2.53   0
   6   7 -13   -4.07    2.98   0
   7   3  -6    3.20    1.86   0
   7   6 -12   60.00    2.49   0
   8  -4  -1    7.07    2.20   0
   8  -2  -2    6.38    2.50   0
   8   2  -6   30.40    2.32   0
   8   4  -9   18.82    2.15   0
   8   5 -11   13.86    3.04   0
   9  -5  -2    0.06    2.96   0
   9  -3  -3    1.81    2.37   0
   9   0  -5   -0.75    2.59   0
   9   2  -8   -2.87    2.43   0
   9   3  -9    4.61    2.69   0
   9   4 -11   19.98    3.48   0
  10  -1  -6    3.87    2.97   0
  10   0  -7    7.61    2.89   0
  -7  -8  -8   12.30    3.07   0
  -7  -7  -8    3.83    3.06   0
  -7  -6  -8    3.03    2.42   0
  -7  -4  -9    2.82    2.17   0
  -7  -3 -10    0.58    2.24   0
  -6 -11  -5   -5.13    2.52   0
  -6 -10  -5    2.62    2.29   0
  -6  -9  -5   -5.50    2.95   0
  -6  -6  -5   63.79    3.12   0
  -6  -5  -5   89.38    2.46   0
  -6   0 -10    5.51    2.54   0
  -5 -11  -3   43.78    2.41   0
  -5  -5  -3   63.36    3.09   0
  -5  -3  -4   93.78    3.08   0
  -5   4 -17    1.48    4.70   0
  -4 -13  -2   14.86    2.29   0
  -4 -12  -2    5.59    2.82   0
  -4 -11  -1    6.25    2.09   0
  -4 -10  -1   55.76    2.64   0
  -4  -5  -1 1339.10    5.66   0
  -4  -3  -2  400.95    4.19   0
  -3 -13  -1   18.09    2.77   0
  -3 -12   0   36.06    2.07   0
  -3 -11   0   13.37    2.64   0
  -3  -4   0  901.27    4.52   0
  -3   6 -15    6.11    2.65   0
  -2 -12   1   76.17    2.37   0
  -2 -11   1   24.46    2.62   0
  -2  -4   1    6.50    1.79   0
  -2  -2   0 1287.73    6.84   0
  -2   5  -9  314.36    4.43   0
  -2   6 -12   77.35    2.66   0
  -2   7 -17   19.92    2.52   0
  -2   7 -16   56.93    2.87   0
  -1 -13   1    5.22    2.33   0
  -1 -11   2   -4.83    2.07   0
  -1   3  -4  453.42    5.22   0
  -1   6 -10  333.59    3.61   0
  -1   7 -13  126.08    3.33   0
   0 -14   1    7.27    2.13   0
   0 -12   2   10.34    2.88   0
   0  -9   3   -0.10    2.04   0
   0  -8   3  475.34    3.58   0
   0  -7   3  242.10    3.01   0
   0   8 -16   -3.20    2.12   0
   1 -13   2    3.88    1.91   0
   1 -10   3    7.18    2.48   0
   1  -5   3 1179.70    6.25   0
   1   5  -6  226.94    2.82   0
   1   6  -8  159.80    2.70   0
   1   8 -14   50.65    3.22   0
   2 -13   2    6.63    2.66   0
   2 -11   3    3.84    1.88   0
   2  -5   3   24.74    2.69   0
   2   4  -4  859.45    4.46   0
   2   7 -10    3.18    1.93   0
   2   8 -14    1.87    2.11   0
   2   8 -13  151.71    3.17   0
   3 -13   2   -1.94    2.15   0
   3 -10   3    7.21    2.76   0
   3   4  -4  559.44    3.83   0
   3   7 -10    2.09    2.05   0
   4  -8   3  335.91    4.90   0
   4  -7   3  429.69    5.28   0
   4   3  -3  228.23    2.83   0
   4   5  -6  294.41    2.96   0
   4   6  -8  196.56    2.65   0
   4   7 -10   77.86    2.95   0
   4   8 -14   15.81    1.98   0
   4   8 -13   65.95    2.78   0
   5 -11   2    3.32    3.00   0
   5  -2   1  460.60    5.80   0
   5   4  -5  139.12    2.42   0
   5   7 -11   -0.64    2.02   0
   5   8 -15   18.21    2.27   0
   5   8 -14   50.52    3.26   0
   6   0  -1    0.57    2.70   0
   6   1  -2   23.68    2.08   0
   6   2  -3   26.77    1.99   0
   6   7 -12   -5.63    2.11   0
   7  -3   0  233.31    4.16   0
   7   0  -2    1.39    2.93   0
   7   1  -3    0.73    2.17   0
   7   2  -4  136.14    2.71   0
   7   4  -7  120.92    2.56   0
   7   5  -9    9.10    2.22   0
   7   6 -11   -5.44    2.10   0
   7   7 -14    1.40    2.37   0
   8   3  -7   18.16    2.35   0
   8   5 -10   -3.78    2.79   0
   9  -1  -4  160.94    3.16   0
   9   1  -6  107.75    2.77   0
   9   2  -7   10.69    2.19   0
   9   4 -10   20.87    2.83   0
  10  -2  -5    1.69    2.48   0
  -7  -8  -9   -1.71    3.74   0
  -7  -7  -9   27.54    3.45   0
  -7  -6  -9    1.34    3.25   0
  -7  -5  -9    9.58    2.40   0
  -7  -3 -11    0.23    3.12   0
  -7  -2 -12    0.68    2.65   0
  -7  -1 -14    1.07    2.65   0
  -6 -10  -6   -7.27    2.66   0
  -6  -8  -5   26.61    2.37   0
  -6  -7  -5   33.32    2.40   0
  -6  -5  -6  125.77    3.52   0
  -6  -4  -6   14.45    2.17   0
  -6  -3  -7   49.67    3.18   0
  -6  -1  -9   15.98    3.04   0
  -6   2 -16    2.42    3.76   0
  -5 -12  -4    6.63    2.27   0
  -5 -11  -4   -0.37    3.06   0
  -5 -10  -3   14.90    2.16   0
  -5  -9  -3   12.83    2.02   0
  -5  -8  -3    1.56    2.59   0
  -5  -7  -3  138.90    3.16   0
  -5  -6  -3   52.88    2.23   0
  -5  -2  -5   30.58    2.95   0
  -5   0  -7  463.47    5.19   0
  -4 -13  -3   -2.03    2.17   0
  -4 -11  -2   48.15    2.76   0
  -4  -9  -1   27.81    2.02   0
  -4  -8  -1    3.15    2.02   0
  -4  -7  -1   18.56    2.09   0
  -4  -6  -1  170.98    2.62   0
  -4   5 -15    2.29    2.80   0
  -3 -12  -1    0.36    2.39   0
  -3 -10   0   45.45    2.05   0
  -3  -9   0   10.43    2.77   0
  -3  -5   0  285.11    2.88   0
  -3  -1  -2  163.24    3.04   0
  -3   5 -11  188.46    4.38   0
  -2 -14  -1    9.06    2.26   0
  -2 -10   1   69.93    2.34   0
  -2  -5   1    7.53    2.22   0
  -2   3  -5 2424.50   14.27   0
  -2   7 -15   11.22    2.71   0
  -1 -14   0   26.31    2.30   0
  -1 -12   1   27.43    2.95   0
  -1 -10   2    1.26    1.99   0
  -1  -9   2   53.35    2.67   0
  -1  -6   2 2783.14    7.91   0
  -1  -5   2  684.80    4.12   0
  -1   8 -18   -3.67    2.32   0
  -1   8 -17    3.11    2.69   0
   0 -13   1   28.58    2.75   0
   0 -11   2  103.38    3.21   0
   0   3  -3    2.84    2.61   0
   0   6  -8  367.18    3.95   0
   0   7 -11    1.21    2.18   0
   0   8 -15    3.35    2.32   0
   1 -14   1   18.08    2.14   0
   1 -12   2   30.83    2.65   0
   1  -9   3   33.91    2.03   0
   1  -8   3   58.62    2.89   0
   1  -7   3  826.76    5.26   0
   1  -6   3  449.63    3.88   0
   1   4  -4  539.31    4.08   0
   1   7 -10   15.80    2.00   0
   1   8 -13   32.32    2.01   0
   2 -14   1    8.87    2.97   0
   2 -10   3    2.58    1.91   0
   2  -9   3   30.94    2.67   0
   2   6  -7   49.24    2.49   0
   2   8 -12    4.66    2.55   0
   2   9 -17    2.89    2.31   0
   3 -14   1   14.55    2.94   0
   3 -12   2   62.93    2.99   0
   3  -9   3   15.02    2.81   0
   3  -6   3  422.53    5.39   0
   3   5  -5  487.58    3.99   0
   3   6  -7   -2.06    1.95   0
   3   7  -9   -2.28    2.67   0
   3   8 -12   15.20    1.85   0
   3   9 -17    3.16    2.21   0
   3   9 -16    7.42    2.78   0
   4 -12   2   -0.42    2.27   0
   4  -1   1  497.73    5.52   0
   4   4  -4  716.24    4.22   0
   4   6  -7   31.30    2.71   0
   4   8 -12   27.99    3.09   0
   4   9 -16   13.84    2.79   0
   5   1  -1    1.50    2.01   0
   5   2  -2   42.25    2.29   0
   5   3  -3  798.53    5.21   0
   5   5  -6  587.86    3.81   0
   5   6  -8   32.09    2.12   0
   5   7 -10    5.93    1.85   0
   5   8 -13   17.88    2.34   0
   6  -3   1   -1.00    2.53   0
   6   3  -4    8.03    2.05   0
   6   4  -5   27.41    2.87   0
   6   5  -7  261.97    3.16   0
   6   6  -9   33.65    2.06   0
   6   7 -11    3.69    2.22   0
   6   8 -15   13.74    2.45   0
   6   8 -14   -5.25    3.10   0
   7  -1  -1   50.25    3.23   0
   7   3  -5   29.20    2.05   0
   7   4  -6   48.14    2.79   0
   7   5  -8   10.02    2.13   0
   7   6 -10   81.11    2.23   0
   7   7 -13    2.63    2.26   0
   8  -7   0    2.73    4.00   0
   8  -3  -1    3.31    2.75   0
   8  -1  -2    1.56    2.32   0
   8   0  -3   -0.66    1.97   0
   8   1  -4   17.48    1.95   0
   8   2  -5   19.03    2.17   0
   8   3  -6    3.17    2.91   0
   8   4  -8   11.70    2.04   0
   8   6 -12   16.78    2.35   0
   9  -4  -2   20.33    2.44   0
   9  -2  -3    1.48    2.04   0
   9   3  -8   30.33    2.49   0
  10  -3  -4   -0.27    2.51   0
  10   0  -6    4.21    3.04   0
  10   1  -7   10.89    3.43   0
  -7  -7 -10    4.96    3.79   0
  -7  -6 -10   27.28    3.21   0
  -7  -5 -10    1.48    2.61   0
  -7  -4 -11    6.77    3.69   0
  -7  -3 -12   -0.93    3.63   0
  -7  -2 -13   39.17    3.39   0
  -6 -10  -7   -1.37    3.13   0
  -6  -9  -6   17.90    2.48   0
  -6  -8  -6    3.27    2.19   0
  -6  -7  -6   97.81    2.88   0
  -6  -6  -6    2.87    2.05   0
  -6  -4  -7   -4.04    3.01   0
  -6  -2  -8    4.61    2.22   0
  -6   0 -11    1.46    2.92   0
  -6   1 -13    6.31    2.98   0
  -5 -12  -5    2.84    2.25   0
  -5 -10  -4    2.61    1.96   0
  -5  -4  -4   42.76    2.10   0
  -5  -1  -6   -0.54    2.02   0
  -4 -13  -4   20.71    2.94   0
  -4 -12  -3    1.36    2.25   0
  -4 -10  -2   57.29    2.12   0
  -4  -9  -2    8.91    2.50   0
  -4  -4  -2 2532.99    7.61   0
  -4  -2  -3   41.29    2.20   0
  -4   1  -6  182.36    4.91   0
  -3 -13  -2    1.52    2.24   0
  -3 -11  -1    1.35    1.88   0
  -3  -8   0   84.04    2.28   0
  -3  -7   0    9.16    2.17   0
  -3  -6   0   36.67    2.21   0
  -3  -3  -1   34.35    1.91   0
  -3   0  -3  277.12    4.46   0
  -3   1  -4  850.13    8.69   0
  -3   6 -14   -0.13    2.90   0
  -2 -13  -1   30.92    2.80   0
  -2 -12   0   29.99    2.17   0
  -2  -9   1  308.94    3.00   0
  -2  -8   1    3.17    1.96   0
  -2  -7   1  247.35    3.31   0
  -2  -6   1   11.20    1.77   0
  -2   6 -11   35.70    2.45   0
  -1 -13   0   -2.36    1.94   0
  -1 -11   1   12.75    2.81   0
  -1  -8   2   75.33    2.31   0
  -1  -7   2   71.86    2.27   0
  -1  -1   0 1778.66   10.61   0
  -1   5  -7  500.03    4.37   0
  -1   6  -9   45.85    2.84   0
  -1   7 -12  311.61    3.47   0
  -1   8 -16   -0.22    3.09   0
   0 -14   0   22.35    2.22   0
   0 -10   2  107.50    2.94   0
   0  -4   2 1662.15    7.54   0
   0   5  -6 2973.61    8.80   0
   0   7 -10   28.76    2.53   0
   0   8 -14   80.70    2.69   0
   1 -13   1   23.75    2.71   0
   1 -11   2   -0.89    2.74   0
   1   6  -7  135.06    2.69   0
   1   7  -9    4.46    2.61   0
   1   8 -12  300.71    3.66   0
   1   9 -17   21.64    2.25   0
   2 -12   2    1.47    2.03   0
   2  -8   3  378.66    3.70   0
   2  -7   3   81.30    3.32   0
   2  -6   3   61.50    2.31   0
   2   2  -1 7641.66   15.46   0
   2   5  -5  330.81    2.95   0
   2   7  -9  175.34    2.53   0
   2   9 -16   21.74    2.23   0
   2   9 -15   -0.65    3.09   0
   3  -8   3    7.95    1.91   0
   3  -7   3   11.03    2.56   0
   3   2  -1 1989.35    7.43   0
   3   3  -2 1261.13    5.58   0
   3   8 -11   72.21    2.90   0
   3   9 -15   24.09    2.33   0
   4 -13   1    3.00    2.83   0
   4 -11   2   54.25    3.14   0
   4   5  -5   37.02    2.17   0
   4   7  -9   17.91    2.03   0
   4   8 -11   10.13    2.43   0
   4   9 -15    4.65    2.17   0
   5 -10   2   11.68    2.63   0
   5  -4   2   25.15    4.26   0
   5   0   0    1.86    2.05   0
   5   4  -4   84.21    2.28   0
   5   6  -7  170.02    3.44   0
   5   7  -9   73.05    2.93   0
   5   8 -12  109.12    2.36   0
   6 -11   1    6.89    2.89   0
   6  -1   0  118.95    2.93   0
   6   5  -6  222.30    3.62   0
   6   6  -8    5.32    1.99   0
   6   7 -10    4.36    2.06   0
   6   8 -13   56.15    2.48   0
   7  -6   1   36.84    4.89   0
   7   5  -7   16.70    2.74   0
   7   6  -9   -1.92    2.05   0
   7   7 -12    1.05    2.19   0
   8  -6   0    2.78    3.18   0
   8   4  -7    0.31    2.07   0
   8   5  -9    1.92    2.28   0
   8   6 -11    5.42    2.35   0
   9  -3  -2   23.46    3.15   0
   9  -1  -3    8.81    2.57   0
   9   0  -4   -1.76    2.04   0
   9   1  -5    0.27    2.20   0
   9   2  -6    1.23    2.35   0
   9   4  -9    0.91    1.99   0
  10  -2  -4    6.64    2.76   0
  10  -1  -5   38.31    2.58   0
  -7  -6 -11    9.96    3.39   0
  -7  -5 -11   17.13    2.62   0
  -7  -4 -12    8.26    3.68   0
  -7  -3 -13   -0.92    3.65   0
  -7  -2 -14    4.17    3.19   0
  -6 -10  -8   -1.96    3.43   0
  -6  -9  -7   13.82    2.52   0
  -6  -8  -7   -0.82    2.62   0
  -6  -7  -7   28.57    3.04   0
  -6  -6  -7   36.98    3.23   0
  -6  -5  -7    5.12    2.59   0
  -6  -3  -8   95.09    3.61   0
  -6  -1 -10    4.17    2.90   0
  -5 -11  -5   30.79    2.26   0
  -5 -10  -5    1.07    2.87   0
  -5  -9  -4    0.14    2.07   0
  -5  -8  -4    3.30    2.06   0
  -5  -7  -4   -0.66    2.29   0
  -5  -6  -4    7.88    2.11   0
  -5  -5  -4  311.64    3.19   0
  -5  -3  -5  130.64    3.18   0
  -5   3 -13   11.98    5.43   0
  -4 -12  -4    3.39    2.84   0
  -4 -11  -3    5.96    2.12   0
  -4  -8  -2    3.70    2.11   0
  -4  -7  -2    7.62    2.00   0
  -4  -6  -2   32.56    2.14   0
  -4  -5  -2   35.14    2.38   0
  -4  -1  -4  327.31    3.79   0
  -4   0  -5    0.39    2.65   0
  -4   4 -11  115.34    6.23   0
  -4   5 -14   10.53    3.56   0
  -3 -13  -3   10.32    2.70   0
  -3 -12  -2   67.84    2.13   0
  -3 -10  -1   45.83    2.02   0
  -2 -14  -2    0.49    2.28   0
  -2 -12  -1   41.71    2.81   0
  -2 -11   0    3.46    1.87   0
  -2 -10   0   83.17    2.92   0
  -2  -3   0  147.07    2.80   0
  -2  -1  -1  603.00    5.57   0
  -2   7 -14   15.34    2.26   0
  -1 -14  -1   22.92    2.12   0
  -1 -12   0   -5.14    2.77   0
  -1 -10   1   49.83    2.79   0
  -1  -3   1    8.72    2.23   0
  -1   4  -5  534.39    5.09   0
  -1   7 -11   21.16    2.69   0
  -1   8 -15    0.59    1.98   0
   0 -12   1   80.63    2.41   0
   0  -9   2    0.38    1.92   0
   0   4  -4  392.75    4.15   0
   0   8 -13   16.67    1.85   0
   0   9 -17   -5.86    2.67   0
   1 -14   0   27.77    2.19   0
   1 -10   2   10.95    2.83   0
   1  -3   2  693.26    6.69   0
   1   5  -5  104.71    2.20   0
   1   8 -11    8.42    2.43   0
   1   9 -16   -1.60    2.18   0
   1   9 -15   94.19    3.31   0
   2 -13   1   24.97    2.36   0
   2 -11   2   14.47    1.91   0
   2   1   0  905.81    6.58   0
   2   3  -2  997.04    5.36   0
   2   4  -3  974.08    5.03   0
   2   6  -6    0.33    2.66   0
   2   7  -8   63.06    2.86   0
   2   8 -11   44.33    2.01   0
   2   9 -14   -1.45    2.00   0
   3 -13   1   19.83    2.18   0
   3 -11   2    0.90    2.03   0
   3   1   0    5.01    1.64   0
   3   4  -3 2949.40    7.65   0
   3   6  -6   59.60    2.28   0
   3   7  -8   31.23    2.02   0
   3   8 -10   44.18    2.55   0
   3   9 -14    1.86    2.06   0
   4   2  -1    6.12    2.07   0
   4   3  -2  564.78    3.77   0
   4   4  -3  286.34    3.29   0
   4   6  -6   44.46    2.75   0
   4   7  -8   85.59    2.34   0
   4   9 -14   57.77    2.65   0
   5 -12   1    5.54    2.66   0
   5  -9   2    3.39    2.56   0
   5   5  -5  171.70    2.70   0
   5   8 -11    7.03    2.06   0
   5   9 -15   30.11    2.49   0
   5   9 -14    2.11    2.97   0
   6   1  -1  264.72    3.45   0
   6   2  -2  295.73    3.23   0
   6   3  -3   18.04    2.05   0
   6   4  -4   31.24    2.54   0
   6   6  -7   70.26    2.89   0
   6   7  -9   21.17    2.99   0
   6   8 -12   -0.20    2.24   0
   7  -2   0    9.64    2.86   0
   7   1  -2   43.39    2.37   0
   7   2  -3   25.39    2.15   0
   7   3  -4   25.01    2.19   0
   7   4  -5   -1.98    2.76   0
   7   6  -8    4.36    2.53   0
   7   7 -11    3.83    2.38   0
   8  -5   0    7.57    3.36   0
   8  -2  -1   35.24    2.74   0
   8   1  -3   13.84    1.91   0
   8   2  -4   22.07    2.23   0
   8   3  -5   75.49    2.59   0
   8   5  -8    4.59    2.08   0
   8   6 -10    2.33    2.21   0
   9   4  -8   -2.52    2.16   0
   9   5 -10    2.26    2.34   0
  10   0  -5    0.59    3.11   0
  10   1  -6   -1.56    2.38   0
  -7  -5 -12   11.82    3.02   0
  -7  -4 -13   47.20    4.33   0
  -7  -3 -14    4.48    4.22   0
  -6  -9  -8   17.36    2.39   0
  -6  -8  -8   15.16    3.28   0
  -6  -4  -8  152.81    3.39   0
  -6  -2  -9    5.74    2.20   0
  -5 -11  -6    9.07    2.15   0
  -5  -9  -5  158.70    2.70   0
  -5  -8  -5   55.07    2.77   0
  -5  -4  -5   12.86    2.76   0
  -5  -2  -6   16.74    2.82   0
  -5   1  -9   58.15    3.50   0
  -4 -13  -5    6.66    2.33   0
  -4 -11  -4   26.04    2.40   0
  -4 -10  -3   19.53    1.98   0
  -4  -9  -3   40.01    2.52   0
  -4  -3  -3    4.66    2.01   0
  -3 -12  -3   14.14    2.86   0
  -3 -11  -2    2.04    1.95   0
  -3  -9  -1    0.15    1.92   0
  -3  -8  -1  127.52    2.42   0
  -3  -7  -1  311.47    3.51   0
  -3  -5  -1   31.11    2.61   0
  -3  -4  -1  124.21    2.22   0
  -3  -2  -2  158.35    3.23   0
  -3   6 -13   13.95    2.80   0
  -3   7 -18    0.47    3.47   0
  -2 -14  -3   24.64    2.31   0
  -2 -13  -2   10.22    2.13   0
  -2 -11  -1    0.43    2.49   0
  -2  -9   0  132.11    2.35   0
  -2   5  -8   95.01    2.77   0
  -2   6 -10    8.04    2.68   0
  -2   7 -13   23.46    2.70   0
  -1 -14  -2    0.11    2.70   0
  -1 -13  -1   13.27    2.04   0
  -1  -9   1   15.04    1.98   0
  -1  -4   1   41.57    2.90   0
  -1   8 -14   16.33    2.96   0
   0 -14  -1    7.17    2.07   0
   0 -13   0   -0.51    1.91   0
   0 -11   1   12.22    1.97   0
   0  -8   2  137.51    2.50   0
   0  -7   2  678.91    4.12   0
   0  -6   2   -1.77    1.94   0
   0  -5   2  912.53    5.08   0
   0   6  -7    6.33    2.09   0
   0   7  -9   17.30    2.80   0
   0   8 -12    0.19    1.94   0
   0   9 -16   13.45    2.94   0
   1 -12   1   14.69    2.05   0
   1  -9   2    8.97    2.49   0
   1   2  -1 3823.33   12.61   0
   1   3  -2  389.41    4.41   0
   1   6  -6  175.46    3.24   0
   1   7  -8  441.95    4.04   0
   1   9 -14   18.27    2.06   0
   2 -14   0    7.60    2.15   0
   2 -12   1   32.93    2.97   0
   2 -10   2   32.42    2.80   0
   2   5  -4   99.70    2.93   0
   2   8 -10    0.74    1.87   0
   2   9 -13   -0.04    1.97   0
   3 -14   0   44.49    2.78   0
   3 -10   2    3.36    2.76   0
   3   5  -4  284.29    2.90   0
   3   9 -13    5.00    1.94   0
   3   9 -12    1.37    2.73   0
   4 -12   1   44.95    3.34   0
   4 -10   2   57.78    2.21   0
   4   1   0  387.98    3.68   0
   4   5  -4   14.15    3.02   0
   4   8 -10   -0.23    1.85   0
   4   9 -13    5.21    2.21   0
   4   9 -12   23.14    2.40   0
   5  -1   1  343.94    4.59   0
   5   2  -1 1186.73    5.80   0
   5   3  -2   42.21    3.23   0
   5   6  -6  158.27    2.58   0
   5   7  -8   27.71    2.02   0
   5   8 -10    3.32    2.05   0
   5   9 -13    9.75    2.16   0
   6 -10   1   23.17    3.59   0
   6   5  -5  124.40    3.30   0
   6   8 -11   38.18    2.35   0
   7  -5   1   12.46    3.25   0
   7   0  -1  262.52    3.47   0
   7   5  -6   36.48    2.13   0
   7   7 -10    0.67    2.20   0
   7   8 -12   23.39    2.39   0
   8   0  -2   31.44    2.11   0
   8   4  -6    9.97    2.12   0
   8   5  -7    7.94    2.71   0
   8   6  -9   11.28    2.16   0
   8   7 -11   -2.74    2.40   0
   9  -6  -1    2.75    3.37   0
   9  -2  -2    0.07    2.77   0
   9   0  -3   -3.10    2.43   0
   9   1  -4  176.53    3.02   0
   9   2  -5    3.93    2.21   0
   9   3  -6   35.74    2.32   0
   9   4  -7   12.28    2.89   0
   9   5  -9   -6.69    2.34   0
  10  -3  -3    1.42    3.41   0
  10  -1  -4   -2.89    3.06   0
  -6  -9  -9    5.75    2.27   0
  -6  -7  -8    9.07    2.53   0
  -6  -6  -8   13.10    2.34   0
  -6  -5  -8   24.61    2.30   0
  -6  -3  -9   -0.22    2.14   0
  -6  -2 -10   62.61    3.25   0
  -6   0 -12   77.91    3.60   0
  -6   1 -14   14.61    3.25   0
  -5 -11  -7   14.43    2.32   0
  -5  -9  -6    9.52    3.01   0
  -5  -6  -5    7.54    2.05   0
  -5  -5  -5  124.55    2.64   0
  -5  -1  -7   55.91    2.57   0
  -5   0  -8   -0.21    2.85   0
  -4 -12  -5    1.98    2.17   0
  -4 -10  -4    4.72    1.95   0
  -4  -8  -3  297.38    3.02   0
  -4  -7  -3  387.90    3.21   0
  -4  -6  -3    6.93    2.63   0
  -4  -5  -3   22.71    2.83   0
  -4  -4  -3  298.85    3.28   0
  -4  -2  -4  196.68    3.60   0
  -3 -13  -4   10.89    2.08   0
  -3 -10  -2    4.30    2.02   0
  -3   4  -8    7.97    3.40   0
  -3   5 -10  378.51    5.41   0
  -3   7 -17  109.36    4.02   0
  -2 -14  -4    4.71    3.13   0
  -2 -13  -3   -3.03    2.76   0
  -2 -12  -2    2.95    1.94   0
  -2 -10  -1   40.43    2.68   0
  -2  -8   0  155.19    2.46   0
  -2  -7   0   13.65    2.05   0
  -2  -6   0  353.93    3.50   0
  -2  -5   0  168.94    2.76   0
  -2  -4   0  173.32    2.58   0
  -2   8 -17    3.00    3.09   0
  -1 -12  -1    6.46    2.72   0
  -1 -11   0   -3.33    2.05   0
  -1  -8   1  223.13    2.75   0
  -1  -7   1   41.93    2.10   0
  -1  -6   1   57.89    2.77   0
  -1  -5   1 2282.40    7.37   0
  -1   6  -8  100.00    2.58   0
  -1   7 -10    0.90    2.59   0
  -1   8 -13   -2.88    2.67   0
   0 -12   0  137.03    2.62   0
   0 -10   1  180.24    2.75   0
   0  -2   1   52.62    2.98   0
   0   5  -5   93.19    2.28   0
   0   8 -11    7.07    2.60   0
   0   9 -15    9.70    2.24   0
   1 -14  -1   20.21    2.12   0
   1 -13   0   -0.60    1.95   0
   1  -8   2   19.53    2.69   0
   1   4  -3  759.22    4.75   0
   1   8 -10    7.37    1.99   0
   1   9 -13    5.86    2.19   0
   2 -13   0   -1.71    2.97   0
   2   7  -7   20.39    1.95   0
   2   8  -9   30.16    2.93   0
   2   9 -12   22.70    2.24   0
   2  10 -16    3.20    2.14   0
   3 -12   1    5.74    1.86   0
   3   0   1 2429.33   10.52   0
   3   6  -5    2.28    1.99   0
   3   7  -7    2.62    1.94   0
   3   8  -9   81.61    2.34   0
   3  10 -16    8.50    2.46   0
   3  10 -15   -0.39    2.20   0
   4 -13   0   -1.76    2.86   0
   4  -9   2    9.74    2.55   0
   4   6  -5   -3.46    2.69   0
   4   7  -7    9.96    1.94   0
   4   8  -9   19.70    2.10   0
   4   9 -11   -1.24    2.60   0
   4  10 -15    4.19    2.51   0
   5 -11   1   -1.54    2.82   0
   5  -8   2    7.71    2.53   0
   5   1   0  139.15    3.37   0
   5   5  -4  183.45    2.65   0
   5   7  -7  276.61    3.54   0
   5   8  -9   -0.62    2.71   0
   5   9 -12   32.95    2.23   0
   6  -2   1   28.85    2.81   0
   6   0   0 1362.71    6.31   0
   6   6  -6    0.24    2.02   0
   6   7  -8   28.65    2.23   0
   6   8 -10    1.53    1.93   0
   6   9 -13    1.12    2.22   0
   7   3  -3  169.30    2.84   0
   7   4  -4    9.22    2.63   0
   7   6  -7    0.09    2.17   0
   7   7  -9    0.23    2.08   0
   7   8 -11   -0.57    2.39   0
   8  -4   0    9.31    2.95   0
   8  -1  -1   33.48    2.79   0
   8   2  -3   33.31    2.63   0
   8   3  -4   42.51    3.00   0
   8   4  -5    3.18    2.66   0
   8   6  -8   -1.42    3.08   0
   8   7 -10   -4.77    2.21   0
   9  -5  -1   10.27    3.06   0
   9   5  -8    0.04    2.21   0
  10  -2  -3    5.60    2.81   0
  10   1  -5   38.10    2.48   0
  10   2  -6    5.19    2.33   0
  -6  -9 -10    3.14    2.54   0
  -6  -8  -9    0.25    2.41   0
  -6  -7  -9    9.70    2.31   0
  -6  -6  -9    9.59    2.42   0
  -6  -5  -9   -4.09    2.48   0
  -6  -4  -9   20.98    2.39   0
  -6  -1 -11   45.37    2.58   0
  -5 -11  -8    5.47    2.24   0
  -5 -10  -7   13.48    2.44   0
  -5  -8  -6    1.28    2.06   0
  -5  -7  -6    5.88    2.90   0
  -5  -4  -6   -2.41    2.60   0
  -5  -3  -6  620.42    4.46   0
  -5   2 -11  104.92    4.06   0
  -4 -12  -6   -0.51    2.06   0
  -4 -11  -5   17.16    2.06   0
  -4  -9  -4  192.15    2.70   0
  -3 -13  -5   -2.22    2.31   0
  -3 -12  -4   -1.77    2.07   0
  -3 -11  -3   82.05    2.40   0
  -3  -9  -2   19.30    1.98   0
  -3  -8  -2   17.27    2.75   0
  -3  -3  -2  173.38    2.97   0
  -3   7 -16    4.47    3.11   0
  -2 -11  -2   14.15    2.49   0
  -2   0  -2 2655.34   13.57   0
  -2   4  -6  454.21    5.29   0
  -2   7 -12    0.30    2.77   0
  -2   8 -16    3.55    2.26   0
  -1 -14  -3   12.99    2.13   0
  -1 -13  -2    1.11    1.78   0
  -1 -10   0   81.60    2.38   0
  -1   5  -6  990.58    5.79   0
  -1   9 -17   13.89    2.29   0
   0 -14  -2   18.71    2.07   0
   0 -13  -1   27.85    2.02   0
   0 -11   0    0.45    2.63   0
   0  -9   1   32.90    2.01   0
   0   7  -8   87.22    2.91   0
   0   9 -14   58.83    2.30   0
   1 -12   0    5.08    2.76   0
   1  -7   2   56.04    2.80   0
   1  -4   2 2250.41    9.44   0
   1   5  -4   18.80    1.64   0
   1   7  -7  188.67    3.24   0
   1   9 -12   21.35    2.23   0
   1  10 -16    2.04    3.02   0
   2 -14  -1    0.94    2.14   0
   2 -11   1    2.03    2.31   0
   2  -9   2   93.65    2.35   0
   2   6  -5  519.48    3.70   0
   2   9 -11   23.71    1.93   0
   2  10 -15   -5.13    2.20   0
   3 -14  -1    3.12    2.80   0
   3 -13   0    2.17    2.16   0
   3  -9   2   19.15    2.64   0
   3   4  -2   51.92    2.47   0
   3   7  -6  195.28    3.04   0
   3   8  -8  181.98    3.20   0
   3   9 -11    3.52    1.97   0
   3  10 -14   28.13    2.25   0
   4 -11   1    5.77    2.83   0
   4   0   1    2.45    2.50   0
   4   7  -6  254.85    3.15   0
   4   8  -8   58.30    2.76   0
   4  10 -14    2.26    2.23   0
   5   6  -5   33.28    2.02   0
   5   9 -11   18.47    2.07   0
   6   2  -1  797.46    4.92   0
   6   3  -2   13.24    2.13   0
   6   4  -3  281.01    2.94   0
   6   5  -4  231.80    3.60   0
   6   7  -7   -2.24    1.80   0
   6   8  -9    4.72    2.09   0
   6   9 -12    3.87    2.17   0
   6   9 -11   -0.46    2.74   0
   7  -4   1   93.50    3.57   0
   7  -1   0    0.05    2.11   0
   7   1  -1   51.31    2.99   0
   7   5  -5   23.89    2.02   0
   7   6  -6    2.16    2.68   0
   7   7  -8    5.32    1.82   0
   7   8 -10   11.58    2.21   0
   8  -3   0    9.15    2.56   0
   8   1  -2    2.36    1.72   0
   8   5  -6   -1.59    1.94   0
   8   7  -9   -3.08    2.98   0
   9  -4  -1   22.77    3.17   0
   9  -1  -2   99.23    2.72   0
   9   1  -3   12.37    2.85   0
   9   2  -4    2.90    2.01   0
   9   3  -5    0.55    2.25   0
   9   4  -6    3.13    2.07   0
   9   5  -7    8.11    2.62   0
  10   0  -4    5.77    2.27   0
  -6  -8 -11   -0.08    3.49   0
  -6  -8 -10    8.14    2.52   0
  -6  -7 -10   -5.17    2.51   0
  -6  -6 -10    5.31    2.95   0
  -6  -5 -10    9.31    3.27   0
  -6  -4 -10   71.04    3.38   0
  -6  -3 -10    9.17    2.21   0
  -6  -2 -11   13.69    3.26   0
  -6  -1 -12   10.35    3.38   0
  -6   0 -13   -0.69    2.86   0
  -6   1 -15   14.54    3.19   0
  -5 -10  -8    1.02    2.53   0
  -5  -9  -7  165.38    2.95   0
  -5  -8  -7   42.45    3.20   0
  -5  -6  -6   45.72    2.24   0
  -5  -5  -6   52.57    2.61   0
  -5  -2  -7  223.61    3.38   0
  -4 -12  -7    3.64    2.25   0
  -4 -11  -6   77.19    2.56   0
  -4 -10  -5    3.32    2.11   0
  -4  -9  -5    8.09    2.58   0
  -4  -8  -4    4.15    2.04   0
  -4  -7  -4   60.22    2.21   0
  -4  -6  -4   75.65    2.95   0
  -4  -4  -4  221.96    3.72   0
  -4  -3  -4  473.74    3.96   0
  -4  -1  -5  736.75    5.66   0
  -4   6 -17    3.95    3.39   0
  -3 -13  -6   -0.33    2.20   0
  -3 -12  -5    5.32    2.61   0
  -3 -11  -4    4.23    2.04   0
  -3 -10  -3    7.26    2.00   0
  -3  -9  -3   11.03    2.61   0
  -3  -7  -2    7.96    1.98   0
  -3  -6  -2 1221.24    5.28   0
  -3  -5  -2   60.33    2.76   0
  -3  -4  -2   51.06    2.11   0
  -3  -1  -3  933.02    6.00   0
  -3   6 -12    9.49    2.96   0
  -3   7 -15    5.60    2.60   0
  -2 -14  -5   -4.12    2.44   0
  -2 -13  -4   25.96    2.31   0
  -2 -12  -3    2.52    2.01   0
  -2 -10  -2   28.73    2.68   0
  -2  -8  -1    3.55    2.46   0
  -2  -2  -1  472.77    4.35   0
  -2   6  -9    1.53    2.61   0
  -2   8 -15    2.09    2.95   0
  -1 -14  -4   -7.70    2.95   0
  -1 -13  -3   19.68    2.94   0
  -1 -12  -2   30.27    2.63   0
  -1 -11  -1   13.08    2.03   0
  -1  -9   0   56.93    2.20   0
  -1  -2   0 5277.14   14.66   0
  -1   8 -12   26.24    2.12   0
  -1   9 -16   -6.63    2.23   0
   0 -14  -3   17.39    2.81   0
   0 -13  -2    1.68    2.62   0
   0 -12  -1   78.11    2.36   0
   0  -8   1  120.59    2.38   0
   0   6  -6  186.66    2.93   0
   0   8 -10    2.17    1.96   0
   0   9 -13   -1.64    2.13   0
   1 -14  -2    2.54    1.98   0
   1 -13  -1   -1.32    1.89   0
   1 -10   1    9.18    2.10   0
   1  -6   2   59.89    2.20   0
   1  -5   2   29.12    1.87   0
   1   1   0 1687.82   10.47   0
   1   6  -5   21.61    2.74   0
   1   8  -9   15.24    2.04   0
   1   9 -11    3.95    2.50   0
   1  10 -15   -3.88    2.17   0
   2 -12   0   21.04    2.65   0
   2  -8   2  120.27    2.42   0
   2   0   1  401.65    6.00   0
   2   3  -1 1164.80    5.98   0
   2   4  -2 1678.54    6.54   0
   2   7  -6  131.60    2.44   0
   2   8  -8    9.83    1.94   0
   2   9 -10  112.16    2.95   0
   2  10 -14    3.45    2.19   0
   3 -11   1    1.61    1.93   0
   3  -8   2   10.56    2.71   0
   3   2   0  524.82    4.39   0
   3   3  -1  145.10    2.36   0
   3   5  -3  408.66    3.21   0
   3   9 -10   33.14    1.95   0
   3  10 -13   23.80    2.25   0
   4  -8   2    3.85    2.92   0
   4   3  -1   20.27    1.80   0
   4   4  -2  336.46    3.02   0
   4   5  -3  144.66    2.74   0
   4   6  -4  134.07    2.89   0
   4   9 -10   25.54    2.22   0
   4  10 -13   20.62    2.26   0
   4  10 -12   20.74    2.74   0
   5 -12   0   13.74    2.17   0
   5 -10   1    1.75    2.74   0
   5  -7   2   57.70    3.40   0
   5   3  -1   29.87    2.89   0
   5   4  -2  432.32    4.00   0
   5   5  -3  575.55    4.08   0
   5   7  -6    8.32    2.04   0
   5   8  -8   35.04    2.05   0
   5   9 -10    0.95    1.86   0
   5  10 -13    0.59    2.13   0
   6  -9   1    4.25    2.84   0
   6   1   0  122.45    3.04   0
   6   6  -5  291.88    3.00   0
   6   8  -8    2.96    2.84   0
   7 -10   0   19.66    3.18   0
   7   7  -7    6.13    2.88   0
   7   8  -9   -0.79    2.21   0
   8   0  -1    1.86    2.51   0
   8   3  -3   22.48    2.72   0
   8   4  -4   12.74    2.82   0
   8   6  -7   21.66    2.32   0
   8   7  -8    0.97    2.49   0
   9  -3  -1   13.79    3.17   0
   9   0  -2    0.40    2.37   0
   9   6  -8   28.24    2.52   0
  10  -1  -3   17.00    2.38   0
  10   1  -4   -7.26    3.18   0
  10   2  -5    0.17    2.38   0
  -6  -8 -12   -1.51    3.45   0
  -6  -7 -11    1.46    2.45   0
  -6  -6 -11   11.68    3.54   0
  -6  -4 -11    8.36    3.29   0
  -6  -3 -11    1.14    3.05   0
  -6   0 -14   -0.73    3.46   0
  -6   1 -16    0.22    3.49   0
  -5 -10  -9    5.67    2.24   0
  -5  -9  -8    4.99    2.12   0
  -5  -7  -7   59.63    2.27   0
  -5  -6  -7    8.17    2.63   0
  -5  -5  -7   40.23    2.99   0
  -5  -4  -7    3.96    2.71   0
  -5  -3  -7   77.35    2.41   0
  -5  -1  -8  800.19    5.61   0
  -5   0  -9   33.91    3.09   0
  -5   1 -10   22.31    3.15   0
  -4 -12  -8    6.39    2.32   0
  -4 -11  -7    2.17    2.17   0
  -4 -10  -6   20.49    2.12   0
  -4  -8  -5    4.14    2.68   0
  -4  -5  -4  410.29    3.40   0
  -4   0  -6  670.60    6.17   0
  -4   5 -13    0.21    3.43   0
  -3 -13  -7    4.81    2.93   0
  -3 -10  -4   86.00    2.21   0
  -3  -8  -3    6.42    2.61   0
  -2 -13  -5   -1.53    2.57   0
  -2 -12  -4    3.54    2.84   0
  -2 -11  -3    0.92    1.78   0
  -2  -7  -1  797.06    4.34   0
  -2  -3  -1  198.55    3.45   0
  -2   5  -7   92.41    3.26   0
  -2   7 -11   48.72    3.04   0
  -2   8 -14    5.71    2.90   0
  -1 -10  -1    4.00    1.92   0
  -1  -8   0  167.52    2.57   0
  -1  -7   0  198.81    3.19   0
  -1   6  -7   84.56    2.67   0
  -1   7  -9  317.79    3.47   0
  -1   8 -11   29.85    2.72   0
  -1   9 -15   64.19    2.49   0
   0 -10   0   73.62    2.33   0
   0  -7   1 1081.77    4.96   0
   0  -3   1  590.79    5.46   0
   0   4  -3 1056.36    6.21   0
   0   9 -12   50.21    2.34   0
   0  10 -16    0.73    2.21   0
   1 -11   0    0.05    1.94   0
   1  -9   1  115.82    2.31   0
   1   8  -8  177.26    3.22   0
   1  10 -14    5.23    2.18   0
   2 -14  -2    0.38    2.18   0
   2 -13  -1   12.21    2.11   0
   2 -10   1   35.68    2.24   0
   2  -7   2  281.85    3.55   0
   2  -3   2 2758.90   15.74   0
   2   5  -3  974.37    4.57   0
   2   6  -4   17.88    2.53   0
   2  10 -12   25.45    2.81   0
   3 -14  -2   11.00    3.06   0
   3 -13  -1    1.51    2.97   0
   3 -12   0   36.32    2.38   0
   3 -10   1   56.03    2.71   0
   3  -2   2  152.15    6.00   0
   3   6  -4   69.43    2.43   0
   3   8  -7    0.28    2.03   0
   3   9  -9   60.73    2.20   0
   3  10 -12   10.23    2.10   0
   4 -13  -1   11.29    2.94   0
   4 -12   0   13.11    2.21   0
   4 -10   1   54.45    2.85   0
   4  -2   2 2298.37   13.58   0
   4   2   0  231.00    3.06   0
   4   7  -5   47.13    2.87   0
   4   8  -7   19.15    2.12   0
   4   9  -9    7.98    1.91   0
   4  10 -11    9.18    2.91   0
   5  -3   2   36.43    3.26   0
   5   0   1 1002.99    6.03   0
   5   2   0 1230.01    6.02   0
   5   6  -4  241.34    2.76   0
   5   8  -7   12.07    1.91   0
   5   9  -9   11.43    1.99   0
   5  10 -12   30.44    2.19   0
   6 -11   0    2.26    2.00   0
   6  -1   1  325.91    3.86   0
   6   4  -2  465.52    3.89   0
   6   5  -3   18.02    2.75   0
   6   7  -6  135.69    2.41   0
   6   9 -10    5.02    2.28   0
   7  -3   1    0.52    2.70   0
   7   0   0    1.15    2.11   0
   7   2  -1  211.07    3.37   0
   7   3  -2   41.14    2.21   0
   7   4  -3   50.71    2.10   0
   7   5  -4    3.97    1.86   0
   7   6  -5   -0.81    2.02   0
   7   8  -8   10.29    2.86   0
   7   9 -10   -3.73    2.59   0
   8  -2   0    7.15    2.68   0
   8   2  -2    1.34    1.75   0
   8   5  -5   66.74    2.45   0
   8   6  -6    0.90    2.13   0
   8   8  -9   15.04    2.86   0
   9  -2  -1   55.18    3.10   0
   9   2  -3    8.86    2.61   0
   9   3  -4   46.72    2.32   0
   9   4  -5   -1.49    2.23   0
   9   5  -6   40.10    2.29   0
   9   6  -7   -3.92    2.78   0
  10  -3  -2   10.77    3.42   0
  10   0  -3    1.28    2.95   0
  -6  -7 -12    5.17    2.72   0
  -6  -6 -12    9.81    3.89   0
  -6  -5 -11    4.12    2.28   0
  -6  -3 -12   -0.19    3.50   0
  -6  -2 -12   23.88    2.82   0
  -6  -1 -13    7.16    2.94   0
  -5 -10 -10   17.84    2.44   0
  -5  -9  -9    1.08    2.47   0
  -5  -8  -8   47.54    2.49   0
  -5  -7  -8    7.50    2.66   0
  -5  -2  -8   15.94    3.06   0
  -4 -11  -8   34.87    2.40   0
  -4 -10  -7    7.76    2.66   0
  -4  -9  -6   95.85    2.30   0
  -4  -7  -5  115.57    2.56   0
  -4  -2  -5  152.67    2.91   0
  -4   6 -16    0.67    3.47   0
  -3 -12  -6    1.61    2.00   0
  -3 -11  -5   20.50    2.02   0
  -3  -9  -4    7.99    2.47   0
  -3  -7  -3   11.49    1.97   0
  -3  -2  -3  273.64    3.55   0
  -3   7 -14   21.43    3.12   0
  -2 -10  -3    8.27    2.51   0
  -2  -9  -2   86.68    2.13   0
  -2  -6  -1   86.83    2.06   0
  -2  -5  -1  809.39    4.17   0
  -2  -4  -1  277.07    3.03   0
  -1 -14  -5    2.34    2.07   0
  -1 -13  -4   27.52    2.31   0
  -1 -12  -3   23.70    2.07   0
  -1 -11  -2    1.93    1.90   0
  -1  -9  -1  125.92    2.37   0
  -1  -6   0  286.12    2.95   0
  -1  -3   0 5268.51   12.69   0
  -1   3  -3  534.70    6.09   0
  -1   4  -4  140.45    3.33   0
  -1   9 -14   -2.73    2.05   0
   0 -14  -4   -0.87    2.10   0
   0 -12  -2   18.29    2.05   0
   0 -11  -1   14.63    1.95   0
   0  -9   0   -0.93    1.87   0
   0  -6   1  395.51    3.36   0
   0  -5   1 2310.33    7.90   0
   0  -4   1  899.39    5.92   0
   0   3  -2 1064.76    6.87   0
   0   5  -4 1362.37    6.01   0
   0   7  -7   98.51    2.36   0
   0   8  -9    3.63    2.14   0
   0   9 -11    6.95    2.44   0
   0  10 -15    0.36    2.16   0
   1 -14  -3    5.99    2.16   0
   1 -13  -2   -1.72    1.95   0
   1 -12  -1   33.93    2.19   0
   1 -10   0   87.50    3.06   0
   1  -8   1    8.61    2.65   0
   1   4  -2  567.26    4.51   0
   1   7  -6   59.66    2.19   0
   1   9 -10   15.51    2.06   0
   1  10 -13   21.74    2.04   0
   2 -11   0    7.83    1.77   0
   2  -9   1   -1.48    2.47   0
   2  -6   2  187.80    3.02   0
   2   2   0 1300.50    6.84   0
   2   7  -5  320.93    3.60   0
   2   8  -7   25.04    2.03   0
   2   9  -9   15.38    1.91   0
   2  10 -11   81.48    2.83   0
   3  -7   2   11.46    2.57   0
   3   7  -5  549.30    3.42   0
   3   9  -8    6.42    2.63   0
   3  10 -11    4.05    2.03   0
   3  11 -14   -3.90    2.36   0
   4  -7   2   10.65    2.70   0
   4   8  -6   21.02    2.70   0
   4   9  -8    5.88    1.85   0
   4  10 -10    3.05    2.32   0
   4  11 -13   13.57    3.07   0
   5 -11   0    4.83    2.68   0
   5  -6   2  176.01    4.88   0
   5   7  -5  442.49    3.24   0
   5   9  -8   18.67    2.86   0
   5  10 -11    0.66    2.18   0
   6   3  -1   80.38    2.39   0
   6   6  -4   22.16    2.28   0
   6   7  -5   55.49    2.85   0
   6   8  -7   10.47    2.11   0
   6   9  -9    1.83    2.13   0
   6  10 -11   21.93    2.31   0
   7  -2   1   51.50    2.97   0
   7   7  -6   13.11    2.01   0
   8  -1   0    1.41    2.34   0
   8   1  -1   38.80    2.11   0
   8   4  -3    7.85    2.60   0
   8   5  -4   10.03    2.56   0
   8   7  -7   14.31    2.17   0
   9  -1  -1   16.41    2.78   0
   9   1  -2   98.10    2.65   0
  10  -2  -2   26.68    3.23   0
  10   2  -4   11.12    2.13   0
  -6  -7 -13   -1.84    2.91   0
  -6  -6 -13   23.09    3.28   0
  -6  -5 -12   15.92    2.83   0
  -6  -4 -12    2.97    2.46   0
  -6  -2 -13   29.89    3.28   0
  -6  -1 -14   17.83    3.90   0
  -6   0 -15    5.21    3.12   0
  -5 -10 -11   -0.18    2.59   0
  -5  -9 -10   11.01    2.52   0
  -5  -8  -9    1.82    2.25   0
  -5  -7  -9  138.93    3.69   0
  -5  -6  -8    4.27    2.14   0
  -5  -5  -8   29.34    2.27   0
  -5  -4  -8  148.73    3.65   0
  -5  -3  -8   34.47    2.37   0
  -4 -10  -8    3.53    2.79   0
  -4  -9  -7   11.39    2.68   0
  -4  -8  -6   11.14    1.96   0
  -4  -6  -5  467.67    3.49   0
  -4  -5  -5  124.45    2.48   0
  -4  -4  -5   60.30    2.34   0
  -4  -3  -5  501.90    4.03   0
  -4   1  -7  473.18    6.20   0
  -4   2  -8   38.88    3.88   0
  -3 -12  -7    2.04    2.16   0
  -3 -11  -6   14.77    2.12   0
  -3 -10  -5   17.05    1.82   0
  -3  -6  -3  390.73    3.39   0
  -3  -5  -3  634.32    3.92   0
  -3  -4  -3 1153.31    5.44   0
  -3  -3  -3  104.67    2.27   0
  -3   0  -4    0.44    2.18   0
  -3   5  -9   57.39    3.85   0
  -3   6 -11    0.29    3.04   0
  -2 -13  -6    2.81    2.14   0
  -2 -12  -5   17.31    1.82   0
  -2 -11  -4    1.26    1.86   0
  -2  -8  -2  114.49    2.26   0
  -2   8 -13    7.64    2.11   0
  -1 -14  -6    5.97    2.34   0
  -1 -13  -5    1.31    2.93   0
  -1 -10  -2   19.52    1.96   0
  -1  -8  -1   11.42    2.50   0
  -1  -5   0  218.96    2.69   0
  -1  -4   0 1186.86    5.75   0
  -1   0  -1 1919.61   15.38   0
  -1   5  -5 1810.73    8.25   0
  -1   7  -8   88.18    3.08   0
  -1   8 -10   50.97    2.93   0
  -1   9 -13   13.62    2.23   0
   0 -14  -5    6.47    2.87   0
   0 -10  -1  182.33    3.28   0
   0  -8   0   11.58    2.56   0
   0   6  -5  157.30    2.69   0
   0  10 -14   -2.20    2.19   0
   1 -14  -4    1.04    2.72   0
   1 -11  -1    5.74    2.71   0
   1   3  -1   13.76    2.92   0
   1   5  -3   12.29    1.63   0
   1   6  -4  245.19    3.33   0
   1   8  -7   86.61    3.02   0
   1   9  -9    6.06    2.67   0
   1  10 -12   29.64    2.30   0
   1  11 -15   21.87    3.25   0
   2 -14  -3   20.18    2.20   0
   2 -13  -2    1.43    2.22   0
   2 -12  -1   91.76    2.55   0
   2  -5   2  174.32    3.00   0
   2  -4   2   78.14    2.95   0
   2   9  -8   25.63    2.79   0
   2  11 -14   -0.62    2.14   0
   3 -12  -1    3.41    2.67   0
   3 -11   0   10.40    1.87   0
   3  -9   1    3.26    2.80   0
   3  -6   2 1338.54    8.19   0
   3   1   1  181.29    3.04   0
   3   4  -1  194.63    2.48   0
   3   5  -2   10.65    1.74   0
   3   6  -3  476.81    3.50   0
   3   8  -6   47.52    2.11   0
   3  10 -10   12.80    2.00   0
   3  11 -13   -6.26    2.18   0
   4 -11   0   12.48    2.44   0
   4   1   1  487.93    4.15   0
   4   4  -1   26.09    1.98   0
   4   5  -2  263.75    3.03   0
   4   6  -3   20.22    2.03   0
   4   7  -4    0.24    2.72   0
   4  11 -12   13.80    3.05   0
   5 -12  -1    6.26    2.82   0
   5  -9   1   24.07    2.79   0
   5  -2   2   19.82    3.61   0
   5   1   1  342.52    4.21   0
   5   4  -1   89.33    3.12   0
   5   5  -2   15.50    2.17   0
   5   6  -3   42.81    2.05   0
   5   8  -6    3.69    2.01   0
   5  10 -10   37.61    2.33   0
   6   0   1    4.15    2.22   0
   6   2   0   78.81    2.22   0
   6   8  -6    7.43    2.18   0
   6   9  -8    2.21    2.02   0
   6  10 -10   -2.92    2.16   0
   7   1   0    1.08    1.98   0
   7   4  -2   61.73    2.21   0
   7   5  -3    0.91    1.80   0
   7   6  -4   51.83    2.15   0
   7   7  -5   55.31    2.76   0
   7   8  -7   30.75    2.25   0
   7   9  -9   18.21    2.18   0
   8   3  -2    6.82    2.12   0
   8   6  -5   -4.72    1.96   0
   8   7  -6   15.63    3.10   0
   8   8  -8    7.96    2.12   0
   9   3  -3    8.10    2.06   0
   9   4  -4    7.06    2.14   0
   9   5  -5   12.83    2.13   0
   9   6  -6   10.31    2.17   0
  10  -1  -2    4.54    3.02   0
  10   1  -3   16.59    2.37   0
  10   3  -4    1.63    2.92   0
  -6  -6 -14   15.35    3.29   0
  -6  -5 -14   -2.26    4.13   0
  -6  -5 -13   14.14    2.77   0
  -6  -4 -13    4.47    2.85   0
  -6  -3 -13   20.24    2.75   0
  -6  -2 -14   -0.78    3.59   0
  -6  -1 -15   15.27    3.88   0
  -6   0 -16   -1.99    3.39   0
  -5  -9 -11    0.06    2.24   0
  -5  -8 -10    1.12    2.06   0
  -5  -1  -9   54.59    2.60   0
  -5   0 -10    0.99    3.33   0
  -5   2 -12   48.05    3.46   0
  -5   3 -14   40.36    5.02   0
  -4 -11 -10   11.15    2.24   0
  -4 -10  -9    1.41    3.03   0
  -4  -8  -7    1.23    2.78   0
  -4  -7  -6  324.37    3.22   0
  -4  -6  -6   31.79    2.75   0
  -4  -1  -6  176.12    3.72   0
  -3 -12  -8    0.57    2.16   0
  -3 -11  -7    4.82    1.85   0
  -3 -10  -6    1.98    1.94   0
  -3  -9  -5   90.94    2.29   0
  -3  -7  -4   54.14    2.73   0
  -3   7 -13   12.81    2.75   0
  -3   8 -17    0.07    3.07   0
  -2 -13  -7   11.48    2.27   0
  -2 -12  -6    7.60    1.99   0
  -2 -11  -5    4.38    2.40   0
  -2 -10  -4   21.13    1.92   0
  -2  -9  -3   25.82    1.92   0
  -2  -7  -2  272.56    2.96   0
  -2  -1  -2  206.65    4.09   0
  -2   6  -8  228.64    3.86   0
  -2   7 -10    5.80    2.23   0
  -2   8 -12  113.90    3.13   0
  -2   9 -16   47.16    3.42   0
  -1 -12  -4    2.14    1.90   0
  -1 -11  -3   48.29    2.09   0
  -1   6  -6  269.92    3.94   0
  -1   9 -12   -2.01    3.05   0
  -1  10 -16   -4.71    2.41   0
   0 -13  -4   16.68    2.09   0
   0 -12  -3    0.89    1.95   0
   0 -11  -2  104.08    2.45   0
   0   2  -1   45.44    2.96   0
   0   7  -6 3089.12    8.54   0
   0   8  -8  196.30    2.70   0
   0   9 -10   34.06    2.12   0
   0  10 -13   46.83    2.33   0
   1 -13  -3    1.14    2.07   0
   1 -12  -2   18.98    2.00   0
   1  -9   0   67.33    2.75   0
   1  -7   1    6.03    1.95   0
   1   7  -5  851.59    4.64   0
   1  10 -11   14.28    2.16   0
   1  11 -14   -0.19    2.85   0
   2 -10   0   73.17    2.38   0
   2  -8   1   12.74    2.64   0
   2   4  -1    7.35    2.49   0
   2   5  -2  166.62    2.34   0
   2   6  -3   45.51    2.65   0
   2   8  -6  178.89    2.66   0
   2  10 -10   12.25    2.20   0
   2  11 -13   -1.55    2.03   0
   3 -13  -2    0.59    2.15   0
   3   3   0    7.74    1.62   0
   3   7  -4  422.49    3.28   0
   3   9  -7  114.97    2.34   0
   3  10  -9    2.46    2.18   0
   3  11 -12    4.96    2.16   0
   4 -13  -2    3.54    2.11   0
   4 -12  -1   51.90    2.47   0
   4  -9   1   34.14    2.10   0
   4  -6   2   41.72    2.97   0
   4   3   0  545.43    3.72   0
   4   8  -5   57.42    2.18   0
   4   9  -7   11.89    1.88   0
   4  10  -9   31.46    2.17   0
   4  11 -11   -3.40    2.00   0
   5   3   0  271.00    3.22   0
   5   7  -4    3.36    2.06   0
   5   8  -5   -4.65    2.84   0
   5   9  -7   75.35    2.51   0
   5  10  -9   31.21    2.35   0
   5  11 -11   -0.16    2.21   0
   6 -10   0   -0.99    2.63   0
   6  -8   1    0.18    2.39   0
   6   4  -1   77.41    2.30   0
   6   5  -2  153.31    2.67   0
   6   6  -3   75.56    2.37   0
   6   7  -4  206.74    3.48   0
   6  10  -9   12.49    2.11   0
   7  -9   0    3.45    2.87   0
   7  -1   1    1.70    2.72   0
   7   3  -1   29.77    2.17   0
   7   8  -6   20.61    2.04   0
   7   9  -8   -1.52    2.11   0
   8   0   0   36.98    2.08   0
   8   2  -1   40.62    2.01   0
   8   5  -3   25.50    2.56   0
   8   6  -4    6.39    2.47   0
   8   8  -7   16.73    2.24   0
   9   0  -1    4.36    1.94   0
   9   2  -2   -1.86    1.98   0
   9   5  -4   -1.25    2.57   0
  10   0  -2   13.25    3.12   0
  10   2  -3   14.49    2.97   0
  -6  -5 -15   -3.62    3.50   0
  -6  -4 -15    2.99    4.54   0
  -6  -3 -15    0.91    4.31   0
  -6  -3 -14   13.71    3.10   0
  -6  -2 -15    2.64    3.77   0
  -6  -1 -16   -2.57    4.44   0
  -5  -9 -12   -3.69    2.37   0
  -5  -8 -11   -3.17    2.33   0
  -5  -7 -10    0.84    2.19   0
  -5  -6 -10   53.07    3.21   0
  -5  -5  -9   26.21    2.20   0
  -5  -4  -9  208.25    3.32   0
  -5  -3  -9   40.31    2.39   0
  -5  -2  -9  234.48    3.68   0
  -5   1 -11   13.67    2.84   0
  -5   4 -17    1.83    4.40   0
  -4 -11 -11   -1.44    2.26   0
  -4 -10 -10    3.58    2.95   0
  -4  -9  -8   84.68    2.44   0
  -4  -7  -7    2.51    2.51   0
  -4  -4  -6   55.33    2.86   0
  -4  -3  -6   12.57    3.01   0
  -4  -2  -6   55.57    3.03   0
  -4   6 -15   20.16    4.05   0
  -3 -12  -9    0.92    2.08   0
  -3 -11  -8   -3.27    2.43   0
  -3 -10  -7   19.15    2.86   0
  -3  -9  -6   -3.14    2.46   0
  -3  -8  -5   22.89    1.89   0
  -3  -6  -4   16.23    2.05   0
  -3   8 -16    1.49    2.79   0
  -2 -13  -8   13.66    2.26   0
  -2 -12  -7   -3.19    2.82   0
  -2  -8  -3  362.97    3.09   0
  -2  -6  -2  178.63    2.42   0
  -2  -5  -2  192.06    2.93   0
  -2   9 -15    0.49    2.94   0
  -1 -13  -6    3.39    2.14   0
  -1 -12  -5    2.95    1.90   0
  -1 -11  -4   11.57    2.28   0
  -1 -10  -3    6.48    1.78   0
  -1  -9  -2   10.65    1.88   0
  -1  -7  -1    5.40    1.85   0
  -1   8  -9   13.54    2.89   0
  -1  10 -15    0.55    2.16   0
   0 -14  -6   -2.84    2.16   0
   0 -13  -5    2.57    2.84   0
   0  -9  -1   33.64    1.89   0
   0  -7   0   -3.35    1.88   0
   0  10 -12   65.43    2.49   0
   0  11 -15   -1.00    2.94   0
   1 -14  -5   -1.11    2.17   0
   1 -13  -4   15.73    2.93   0
   1 -10  -1   43.12    2.74   0
   1  -6   1    1.89    1.88   0
   1   8  -6  150.76    3.06   0
   1   9  -8   51.48    2.25   0
   1  10 -10   73.66    3.15   0
   1  11 -13    4.69    2.18   0
   2 -14  -4    8.35    2.11   0
   2 -13  -3    1.97    2.04   0
   2 -12  -2   -0.35    2.05   0
   2 -11  -1   32.02    1.96   0
   2   7  -4    3.79    2.14   0
   2   9  -7    0.35    1.88   0
   2  10  -9   32.14    2.08   0
   2  11 -12   -0.41    2.16   0
   3 -10   0   50.56    2.52   0
   3  -5   2   54.94    2.95   0
   3   8  -5   67.31    2.13   0
   3  10  -8   19.86    2.58   0
   4  -1   2 1302.42    8.96   0
   4   2   1  101.40    3.01   0
   4   9  -6   84.30    2.36   0
   4  10  -8   24.34    2.15   0
   4  11 -10    0.46    2.95   0
   5 -10   0   65.99    3.23   0
   5  -5   2    3.28    3.70   0
   5   6  -2   49.22    2.65   0
   5   9  -6   19.08    2.12   0
   5  10  -8    0.84    1.97   0
   5  11 -10   -3.37    2.13   0
   6 -11  -1    1.73    3.03   0
   6   1   1  343.87    3.55   0
   6   3   0  116.23    2.54   0
   6   8  -5   52.70    2.31   0
   6  10  -8    1.99    2.94   0
   7   0   1  283.66    3.91   0
   7   2   0    7.91    1.99   0
   7   5  -2   -0.23    1.97   0
   7   6  -3   16.28    1.98   0
   7   7  -4   15.18    2.14   0
   7   9  -7    1.41    2.25   0
   8   1   0    6.18    2.36   0
   8   4  -2   25.30    2.26   0
   8   7  -5   15.09    2.22   0
   8   8  -6    3.10    2.88   0
   9  -3   0   -0.24    2.73   0
   9   1  -1   15.48    2.08   0
   9   3  -2   26.20    3.08   0
   9   4  -3   17.88    2.20   0
   9   6  -5    2.17    2.13   0
  10   1  -2    1.56    2.70   0
  -6  -3 -16    2.25    4.59   0
  -6  -2 -16    4.44    3.40   0
  -5  -8 -13   11.10    3.17   0
  -5  -8 -12   25.87    2.51   0
  -5  -7 -11    4.39    2.02   0
  -5  -6 -11   30.31    3.31   0
  -5  -5 -10    8.96    1.95   0
  -5  -4 -10   34.67    3.23   0
  -5  -2 -10  285.40    4.37   0
  -5  -1 -10   21.55    2.47   0
  -4 -10 -11   16.36    2.74   0
  -4  -9  -9    7.25    2.10   0
  -4  -8  -8   11.62    1.93   0
  -4  -6  -7    5.71    1.92   0
  -4   0  -7   -0.24    3.16   0
  -3 -12 -10   14.42    2.27   0
  -3 -11  -9   23.99    2.66   0
  -3  -7  -5  475.95    3.84   0
  -3  -5  -4   30.31    2.01   0
  -3  -4  -4  329.85    3.67   0
  -3  -1  -4  806.46    5.42   0
  -2 -13  -9    3.22    2.25   0
  -2 -12  -8    7.82    2.81   0
  -2 -11  -6   36.64    2.23   0
  -2 -10  -5   -0.01    2.00   0
  -2  -9  -4  228.50    2.76   0
  -2  -7  -3   64.52    2.24   0
  -2  -4  -2   82.44    2.08   0
  -2  -3  -2 2393.26    8.06   0
  -2  -2  -2 3825.21   11.25   0
  -2   7  -9   27.62    2.65   0
  -2   8 -11   25.84    2.64   0
  -2   9 -14   24.69    3.26   0
  -1 -13  -7   27.35    2.15   0
  -1  -8  -2   17.04    2.03   0
  -1  -6  -1    3.52    1.80   0
  -1   2  -2 1336.71   12.40   0
  -1   7  -7   80.00    2.46   0
  -1   9 -11    1.42    1.84   0
  -1  10 -14    7.18    2.18   0
   0 -14  -7   -0.11    2.37   0
   0 -12  -4    7.94    2.04   0
   0 -11  -3    4.37    1.86   0
   0 -10  -2  101.25    2.37   0
   0  -8  -1  120.76    2.99   0
   0  -6   0   76.70    2.09   0
   0   5  -3   28.36    2.44   0
   0   8  -7    3.67    2.13   0
   0   9  -9    2.39    1.97   0
   0  10 -11   10.19    2.88   0
   0  11 -14    0.42    2.62   0
   1 -14  -6   -2.47    3.05   0
   1 -12  -3   39.24    2.14   0
   1 -11  -2    0.67    1.89   0
   1  -8   0  168.05    2.55   0
   1  -5   1 1084.97    6.01   0
   1   2   0 5050.58   14.86   0
   1   6  -3 1485.41    5.86   0
   1  11 -12    7.87    2.14   0
   2 -14  -5   -4.95    2.78   0
   2  -9   0  124.53    2.36   0
   2  -7   1  819.09    5.49   0
   2   1   1  576.40    5.41   0
   2   3   0  149.90    2.80   0
   2   8  -5    3.94    1.95   0
   2  10  -8    8.30    2.46   0
   2  11 -11   11.36    2.18   0
   3 -13  -3   14.08    2.12   0
   3 -12  -2   63.14    2.21   0
   3 -11  -1    2.54    1.87   0
   3  -8   1  135.62    2.68   0
   3   2   1  174.04    3.22   0
   3   5  -1  271.00    2.76   0
   3   6  -2   22.84    2.11   0
   3   7  -3  112.12    2.41   0
   3   9  -6    6.30    2.03   0
   3  11 -10   17.16    2.17   0
   4 -13  -3    3.91    2.87   0
   4 -11  -1   -0.54    2.81   0
   4 -10   0    7.35    1.91   0
   4  -8   1    7.78    2.84   0
   4   4   0  394.46    3.73   0
   4   5  -1   17.35    2.29   0
   4   7  -3    1.11    1.93   0
   4   8  -4   15.19    2.21   0
   4  10  -7   61.46    3.06   0
   4  11  -9    4.40    2.90   0
   5 -12  -2   13.27    2.74   0
   5 -11  -1    4.59    2.64   0
   5  -8   1   78.58    3.05   0
   5  -1   2  763.57    6.12   0
   5   2   1  461.60    3.98   0
   5   4   0  130.89    3.15   0
   5   5  -1  650.14    3.90   0
   5   7  -3  107.86    2.40   0
   5   8  -4   11.67    1.94   0
   5  10  -7    1.29    2.52   0
   5  11  -9   -0.04    2.73   0
   6  -3   2   89.13    4.16   0
   6   5  -1  203.64    3.51   0
   6   6  -2  110.33    2.36   0
   6   7  -3   28.56    2.27   0
   6   8  -4   16.95    2.55   0
   6   9  -6   65.91    2.11   0
   7   4  -1   17.69    1.90   0
   7   8  -5   10.00    1.95   0
   7   9  -6    0.05    2.96   0
   7  10  -8    0.65    2.40   0
   8   3  -1   -1.91    1.96   0
   8   6  -3   39.23    2.84   0
   8   7  -4    8.78    2.54   0
   9  -4   0    9.04    3.22   0
   9  -2   0    8.19    2.96   0
   9  -1   0    9.74    2.48   0
   9   2  -1   59.33    2.77   0
   9   5  -3   14.21    2.98   0
   9   6  -4   26.51    2.98   0
  10  -3  -1    5.31    3.27   0
  10  -2  -1    0.09    3.00   0
  10   3  -3    6.85    2.34   0
  -5  -8 -14   26.38    2.76   0
  -5  -7 -12   28.87    2.48   0
  -5  -6 -12   -0.10    3.19   0
  -5  -5 -11   -4.01    2.53   0
  -5  -3 -10    3.77    2.23   0
  -5   0 -11  760.16    6.62   0
  -5   1 -12   53.83    3.61   0
  -5   2 -13  260.79    5.59   0
  -4 -10 -12    3.48    2.16   0
  -4  -8  -9   30.22    2.09   0
  -4  -7  -8   25.35    1.89   0
  -4  -5  -7  288.42    3.14   0
  -3 -11 -10    2.14    2.65   0
  -3 -10  -8   27.31    2.14   0
  -3  -8  -6   23.49    2.02   0
  -3  -6  -5  103.85    2.97   0
  -3  -3  -4    4.95    1.99   0
  -3  -2  -4  601.82    4.26   0
  -3   1  -5  462.70    6.20   0
  -3   6 -10  219.07    4.77   0
  -3   7 -12   47.99    3.02   0
  -3   8 -15   10.11    3.22   0
  -2 -11  -7   41.95    2.18   0
  -2 -10  -6   -5.58    2.55   0
  -2  -9  -5   13.30    2.80   0
  -2  -8  -4   19.08    1.96   0
  -2  -6  -3   57.58    2.61   0
  -2   1  -3   34.99    3.59   0
  -2   4  -5 2241.03   12.21   0
  -2   5  -6  703.04    6.37   0
  -1 -13  -8    1.18    1.98   0
  -1 -12  -6    4.31    1.91   0
  -1 -11  -5   89.05    2.10   0
  -1 -10  -4    3.35    1.82   0
  -1  -9  -3   40.63    2.04   0
  -1  -7  -2   54.97    2.68   0
  -1  -5  -1 1002.16    4.80   0
  -1   9 -10   58.08    2.87   0
  -1  10 -13   20.96    2.25   0
   0 -13  -6    1.14    2.16   0
   0 -12  -5   42.41    2.73   0
   0  -9  -2    6.07    2.54   0
   0  -5   0    6.62    2.55   0
   0   4  -2 1654.24    7.68   0
   0   6  -4  534.82    3.86   0
   0   7  -5  115.36    3.53   0
   0   9  -8   70.82    2.96   0
   0  11 -13    8.31    2.97   0
   1 -13  -5   -3.55    2.10   0
   1  -9  -1    5.22    2.48   0
   1   4  -1   43.34    2.92   0
   1   5  -2  655.32    3.97   0
   1   7  -4    4.00    2.02   0
   1   9  -7  163.06    2.69   0
   1  10  -9   17.77    1.91   0
   1  11 -11   -3.80    2.68   0
   2 -13  -4   19.55    2.09   0
   2 -12  -3   -0.05    2.41   0
   2 -11  -2  143.69    2.94   0
   2 -10  -1   71.70    2.38   0
   2   6  -2   16.13    2.45   0
   2   7  -3  547.50    4.28   0
   2   9  -6  181.52    2.68   0
   2  11 -10    6.02    2.02   0
   3  -9   0    3.04    2.68   0
   3  -4   2   59.10    3.61   0
   3  -1   2  160.20    4.31   0
   3   4   0  907.42    4.45   0
   3   8  -4   43.11    2.15   0
   3   9  -5    9.67    2.63   0
   3  10  -7   -3.14    1.85   0
   3  11  -9   36.74    2.13   0
   3  12 -12    4.49    2.26   0
   3  12 -11    5.13    2.68   0
   4 -12  -2   -1.98    2.20   0
   4  -5   2   38.51    3.83   0
   4   0   2 2215.23    9.47   0
   4   9  -5    3.51    1.88   0
   5   0   2    7.76    3.13   0
   5   9  -5  110.20    2.45   0
   5  11  -8    0.30    2.99   0
   6  -9   0   11.99    2.92   0
   6  -4   2   34.42    5.14   0
   6  -2   2  549.57    6.04   0
   6  -1   2  274.24    4.04   0
   6   2   1   32.48    2.08   0
   6   4   0   91.37    2.33   0
   6   9  -5    4.24    2.13   0
   6  10  -7   10.37    2.21   0
   7 -10  -1    0.25    2.57   0
   7   1   1    1.47    1.93   0
   7   3   0  238.04    3.02   0
   7   5  -1    8.21    2.48   0
   7   6  -2   19.58    1.94   0
   7   7  -3   -5.00    2.15   0
   7   8  -4   62.86    2.81   0
   7  10  -7    2.77    2.28   0
   8  -9  -1    3.72    3.08   0
   8  -4   1   68.50    4.08   0
   8  -3   1    8.64    2.96   0
   8  -2   1   94.11    3.25   0
   8  -1   1   18.60    2.26   0
   8   2   0    7.13    1.96   0
   8   4  -1   13.75    2.84   0
   8   5  -2   41.02    2.17   0
   8   8  -5    5.32    1.97   0
   9  -5   0   12.33    3.66   0
   9   0   0    1.54    2.70   0
   9   4  -2   22.52    2.24   0
  10  -1  -1   -1.87    2.21   0
  10   0  -1   -0.19    2.64   0
  10   2  -2   26.26    2.32   0
  -5  -7 -14    8.34    2.41   0
  -5  -6 -13   -1.11    2.99   0
  -5  -5 -12   13.96    2.97   0
  -5  -4 -11   90.23    2.62   0
  -5  -3 -11   11.55    2.91   0
  -5  -2 -11   85.70    3.53   0
  -5  -1 -11    8.72    2.40   0
  -5   3 -15   50.04    4.54   0
  -4 -10 -13   14.29    2.50   0
  -4  -9 -12   -1.07    3.23   0
  -4  -9 -11    4.16    2.16   0
  -4  -8 -10   31.89    2.31   0
  -4  -7  -9   23.63    2.26   0
  -4  -6  -8  156.85    2.72   0
  -4  -4  -7    3.08    1.92   0
  -4  -3  -7  254.15    3.12   0
  -4  -2  -7  570.34    4.51   0
  -4  -1  -7  466.79    4.57   0
  -4   1  -8  595.84    6.41   0
  -3 -11 -11   -0.67    2.00   0
  -3 -10  -9   10.14    2.06   0
  -3  -9  -8    4.21    1.84   0
  -3  -8  -7   31.95    2.58   0
  -3  -7  -6  101.71    2.36   0
  -3  -5  -5  280.68    3.73   0
  -2 -12 -10   -0.86    2.76   0
  -2 -12  -9   25.33    2.31   0
  -2 -11  -8   31.18    2.12   0
  -2  -7  -4   85.13    2.80   0
  -2  -5  -3   25.01    2.59   0
  -2   6  -7  339.25    4.66   0
  -2   9 -13    1.83    2.00   0
  -1 -13  -9   16.25    2.18   0
  -1 -12  -7    0.06    1.93   0
  -1 -11  -6   -0.45    2.59   0
  -1  -4  -1 1714.17    6.73   0
  -1  -3  -1  336.04    4.04   0
  -1  -1  -1   44.45    2.84   0
  -1   5  -4   60.55    2.77   0
  -1   6  -5    1.21    2.68   0
  -1   8  -8  539.34    4.05   0
  -1  10 -12   16.19    2.76   0
   0 -13  -7   11.38    2.07   0
   0 -11  -4    2.14    1.87   0
   0 -10  -3  178.71    2.59   0
   0  -7  -1 1066.98    4.84   0
   0   8  -6   -2.43    2.63   0
   0  10 -10    5.56    2.05   0
   0  11 -12   -3.22    2.70   0
   1 -12  -4    3.18    2.00   0
   1 -11  -3   23.66    1.92   0
   1 -10  -2    3.06    1.93   0
   1  -7   0  194.99    2.75   0
   1  -4   1 1812.45    8.20   0
   1   8  -5   -1.89    1.86   0
   1  10  -8   14.62    1.98   0
   1  11 -10   19.51    2.59   0
   1  12 -13    5.15    3.21   0
   2 -13  -5    3.89    2.95   0
   2  -8   0  163.81    3.07   0
   2  -6   1   88.57    3.01   0
   2   5  -1    6.54    1.58   0
   2   8  -4   68.68    2.28   0
   2  10  -7    3.10    2.00   0
   2  11  -9   11.70    2.25   0
   2  12 -12   -3.41    2.29   0
   3 -13  -4   15.75    2.12   0
   3 -12  -3    2.81    2.55   0
   3 -10  -1    6.89    2.45   0
   3  -7   1  318.66    4.06   0
   3  10  -6    6.42    2.62   0
   3  11  -8    0.33    2.20   0
   3  12 -10   19.71    2.55   0
   4 -13  -4   14.85    3.02   0
   4  -9   0   15.24    2.56   0
   4   3   1  176.25    2.58   0
   4   6  -1  566.48    3.56   0
   4   7  -2   79.59    2.26   0
   4   8  -3  116.42    2.42   0
   4  10  -6   64.70    2.36   0
   4  11  -8   49.73    2.46   0
   4  12 -10   12.06    2.13   0
   5  -9   0    0.37    2.48   0
   5   3   1   62.83    2.40   0
   5   6  -1   -2.11    2.06   0
   5   7  -2   47.74    2.20   0
   5   8  -3    2.81    1.96   0
   5  10  -6    4.77    2.07   0
   6  -7   1   19.06    3.21   0
   6   3   1    2.11    2.59   0
   6   6  -1   33.66    2.84   0
   6   7  -2   64.09    2.29   0
   6   8  -3  171.40    3.15   0
   6  10  -6   26.26    2.17   0
   6  11  -8   26.99    2.38   0
   7  -6   1   41.90    5.14   0
   7   2   1   61.99    2.98   0
   7   4   0   19.58    2.62   0
   7   9  -5   17.70    2.22   0
   7  10  -6    3.48    2.66   0
   8  -7   0    3.29    4.18   0
   8   0   1    1.47    2.33   0
   8   3   0   13.35    2.79   0
   8   6  -2    0.85    2.64   0
   8   7  -3   13.83    2.92   0
   8   8  -4   18.70    2.80   0
   9   1   0    3.09    2.70   0
   9   3  -1   20.45    2.15   0
   9   5  -2   -2.29    2.59   0
   9   6  -3    5.14    2.24   0
   9   7  -4    7.25    2.45   0
  10   1  -1    2.90    2.97   0
  10   3  -2   12.44    2.43   0
  -5  -7 -15    3.70    2.73   0
  -5  -5 -13   28.87    2.53   0
  -5  -4 -12    8.37    2.44   0
  -5  -3 -12   -4.81    2.95   0
  -5   0 -12    1.33    3.19   0
  -4  -9 -13    0.69    2.12   0
  -4  -8 -11   65.50    2.39   0
  -4  -7 -10   37.77    2.07   0
  -4  -6  -9  239.03    3.07   0
  -4  -5  -8    1.62    1.94   0
  -4  -4  -8    3.86    2.70   0
  -3 -11 -12    0.27    2.11   0
  -3 -10 -10   24.16    2.05   0
  -3  -9  -9    0.34    2.58   0
  -3  -6  -6    5.53    2.53   0
  -3  -4  -5  284.31    3.05   0
  -3   8 -14   11.10    3.19   0
  -2 -12 -11   -0.07    2.59   0
  -2 -11  -9   -2.59    2.45   0
  -2 -10  -7   18.47    1.86   0
  -2  -9  -6   25.02    1.97   0
  -2  -8  -5   47.89    2.09   0
  -2  -4  -3  333.15    3.42   0
  -2   7  -8  166.46    3.48   0
  -2   8 -10   29.53    2.18   0
  -2   9 -12    0.52    2.87   0
  -1 -13 -10   -1.02    2.28   0
  -1 -12  -8    3.84    2.14   0
  -1 -10  -5   50.63    2.06   0
  -1  -6  -2   57.41    2.04   0
  -1  -2  -1 2675.29   10.68   0
  -1   4  -3  445.85    4.95   0
  -1   7  -6   76.05    2.61   0
  -1   9  -9    1.30    2.62   0
   0 -13  -8   12.21    2.04   0
   0 -12  -6    3.79    2.02   0
   0 -11  -5   17.08    2.52   0
   0  -8  -2  133.14    2.95   0
   0  -4   0 3088.42    9.48   0
   0   9  -7    3.89    2.96   0
   0  10  -9    5.33    2.63   0
   1 -13  -6    9.40    2.19   0
   1 -12  -5   -5.11    2.45   0
   1  -8  -1  229.52    3.36   0
   1  -3   1  348.65    4.98   0
   1   9  -6    3.71    1.95   0
   1  12 -12   18.41    2.92   0
   2 -12  -4    1.48    1.87   0
   2  -9  -1  345.21    3.69   0
   2   2   1  492.86    4.48   0
   2   4   0  182.55    2.62   0
   2   9  -5   18.47    2.24   0
   2  11  -8  105.87    3.17   0
   2  12 -11   25.39    2.20   0
   3 -11  -2   -1.19    1.85   0
   3   0   2    2.50    2.60   0
   3   3   1   29.95    1.69   0
   3   6  -1   58.57    2.21   0
   3   7  -2    6.39    2.01   0
   3   8  -3  188.04    2.65   0
   3   9  -4   72.56    3.08   0
   4 -12  -3    1.47    2.16   0
   4 -11  -2   51.24    3.05   0
   4 -10  -1   15.34    2.60   0
   4  -7   1   24.04    2.84   0
   4   1   2 1307.15    6.52   0
   4   5   0   56.72    2.35   0
   4   9  -4  241.61    2.64   0
   4  10  -5    9.35    2.63   0
   4  11  -7    2.91    1.97   0
   4  12  -9   11.15    2.12   0
   5 -12  -3   20.34    2.80   0
   5 -10  -1   54.28    3.06   0
   5   1   2  806.80    5.15   0
   5   5   0  101.08    2.40   0
   5  10  -5   -2.23    1.99   0
   6 -11  -2   36.31    2.88   0
   6 -10  -1   42.69    2.51   0
   6   0   2  256.63    3.30   0
   6   5   0    4.26    2.00   0
   6   9  -4   96.75    2.42   0
   6  10  -5   -0.05    2.98   0
   6  11  -7    2.76    2.22   0
   7  -8   0   34.27    2.95   0
   7   6  -1   18.79    2.72   0
   7   7  -2   -1.40    2.13   0
   7   8  -3   -3.54    1.97   0
   7   9  -4   19.13    2.99   0
   8   1   1   20.06    2.60   0
   8   5  -1   12.49    1.96   0
   8   9  -5    6.45    2.40   0
   9   2   0   14.83    2.42   0
   9   4  -1   24.59    3.04   0
  10   2  -1    4.25    2.98   0
  -5  -6 -16    5.39    2.77   0
  -5  -6 -15    0.02    2.49   0
  -5  -5 -14    0.67    2.48   0
  -5  -4 -13   16.06    2.40   0
  -5  -3 -13   15.98    3.55   0
  -5  -2 -12   39.49    2.66   0
  -5  -1 -12   52.23    2.80   0
  -5   1 -13   10.37    2.96   0
  -5   2 -14  115.16    4.70   0
  -5   3 -16   47.05    4.96   0
  -4  -9 -14    0.65    2.15   0
  -4  -8 -13   35.86    3.04   0
  -4  -8 -12   -1.60    2.02   0
  -4  -7 -11   26.67    2.76   0
  -4  -6 -10   25.29    2.70   0
  -4  -5  -9    6.51    2.14   0
  -4  -3  -8  889.77    5.52   0
  -4   0  -8   98.62    3.69   0
  -4   6 -14   28.47    4.48   0
  -3 -10 -12   17.73    3.01   0
  -3 -10 -11   10.61    2.28   0
  -3  -9 -10   -1.60    2.75   0
  -3  -8  -8  146.33    2.49   0
  -3  -7  -7   84.82    2.25   0
  -3  -5  -6    3.82    2.73   0
  -3  -3  -5  947.64    4.99   0
  -3  -2  -5 2189.36    8.08   0
  -3   0  -5    9.28    2.30   0
  -3   5  -8    7.93    3.23   0
  -3   7 -11   52.84    3.29   0
  -2 -11 -10    6.82    2.59   0
  -2 -10  -8   42.66    2.11   0
  -2  -9  -7   84.13    2.92   0
  -2  -7  -5    4.55    2.63   0
  -2  -6  -4   25.57    2.06   0
  -2  -3  -3  173.85    3.27   0
  -2   3  -4 1077.86   11.30   0
  -2  10 -15    6.56    2.18   0
  -1 -12  -9    4.75    2.08   0
  -1 -11  -7   49.41    2.32   0
  -1 -10  -6   35.03    2.49   0
  -1  -7  -3  752.82    4.08   0
  -1   8  -7    3.74    2.02   0
  -1  10 -11    1.47    2.19   0
  -1  11 -14    3.43    2.19   0
   0 -13  -9    6.04    2.57   0
   0 -12  -7   -1.79    1.86   0
   0 -10  -4   40.04    2.00   0
   0  -9  -3    3.75    1.91   0
   0  -6  -1  406.10    3.29   0
   0  -3   0   -0.21    2.11   0
   0   3  -1  580.64    5.19   0
   0   6  -3 1489.60    6.59   0
   0   7  -4  515.99    4.53   0
   0  11 -11    2.92    2.12   0
   1 -13  -7    5.35    2.24   0
   1 -11  -4    4.33    1.87   0
   1 -10  -3    3.92    1.86   0
   1  -9  -2   51.05    2.15   0
   1  -6   0  302.15    3.27   0
   1   3   0 5089.56   12.74   0
   1   6  -2 2694.65    7.48   0
   1   7  -3   99.60    2.37   0
   1   8  -4   46.78    2.13   0
   1  10  -7   19.05    2.02   0
   1  11  -9   28.59    2.18   0
   1  12 -11    8.42    3.02   0
   2 -13  -6   15.12    2.11   0
   2 -11  -3    8.40    1.91   0
   2 -10  -2   54.86    2.31   0
   2   6  -1   10.31    2.43   0
   2   7  -2  667.74    4.03   0
   2   8  -3  321.64    2.91   0
   2  10  -6   20.00    2.00   0
   2  12 -10    1.77    2.16   0
   3 -13  -5   21.36    2.13   0
   3 -12  -4   37.30    2.70   0
   3  -8   0   88.19    3.01   0
   3   5   0  297.81    2.79   0
   3  10  -5    2.94    2.00   0
   3  11  -7   46.72    2.23   0
   3  12  -9    5.77    2.20   0
   4 -13  -5   -4.56    3.05   0
   4   4   1  235.66    2.89   0
   4   7  -1  339.33    3.58   0
   4   8  -2   16.57    1.89   0
   4   9  -3   80.49    2.72   0
   4  11  -6   47.58    2.70   0
   4  12  -8   14.31    2.08   0
   5 -11  -2    1.50    1.88   0
   5  -7   1    1.08    2.91   0
   5   2   2   27.98    3.13   0
   5   4   1  448.79    3.36   0
   5   7  -1   66.86    2.25   0
   5   8  -2   45.33    2.05   0
   5   9  -3   88.03    2.21   0
   5  11  -6    2.16    2.08   0
   5  12  -8    3.85    2.22   0
   6   1   2  273.32    3.22   0
   6   4   1   95.41    3.00   0
   6   7  -1   31.87    2.92   0
   6   8  -2    2.87    1.99   0
   6   9  -3   -6.44    2.91   0
   6  11  -6   17.28    2.19   0
   7  -2   2   69.07    3.35   0
   7  -1   2  203.40    4.01   0
   7   0   2    1.17    2.47   0
   7   3   1    6.23    1.97   0
   7   5   0    0.49    1.99   0
   7  10  -5   20.96    2.26   0
   8   2   1   99.77    3.14   0
   8   4   0   13.19    2.09   0
   8   6  -1   20.20    2.47   0
   8   7  -2   13.78    2.25   0
   8   8  -3   31.65    2.26   0
   9   6  -2   14.14    2.15   0
   9   7  -3   21.68    2.52   0
  10   3  -1    2.83    2.92   0
  -5  -5 -16   13.82    2.88   0
  -5  -5 -15   10.05    2.70   0
  -5  -4 -15   -3.79    3.95   0
  -5  -4 -14    1.16    2.29   0
  -5  -2 -13  199.34    3.89   0
  -5  -1 -13   12.29    3.05   0
  -5   0 -13   67.06    3.10   0
  -4  -8 -14    4.20    2.24   0
  -4  -7 -12   20.30    2.12   0
  -4  -6 -11   18.56    2.76   0
  -4  -4  -9   97.75    3.03   0
  -4  -2  -8   39.72    2.20   0
  -4  -1  -8  552.23    4.68   0
  -4   2  -9   61.66    3.53   0
  -3 -10 -13   22.41    2.15   0
  -3  -9 -11   42.35    2.68   0
  -3  -8  -9    0.99    1.98   0
  -3  -7  -8   42.43    2.23   0
  -3  -6  -7    1.12    1.98   0
  -3  -1  -5  431.96    4.13   0
  -3   4  -7    7.90    4.18   0
  -3   8 -13   20.12    3.12   0
  -2 -11 -11    6.60    2.16   0
  -2 -10  -9   38.68    2.32   0
  -2  -8  -6  360.90    3.00   0
  -2  -5  -4   16.51    2.43   0
  -2   0  -3  134.18    4.11   0
  -2   8  -9    6.37    2.84   0
  -2   9 -11   13.25    2.96   0
  -2  10 -14    3.09    2.18   0
  -1 -12 -10   26.04    2.23   0
  -1 -11  -8   67.00    2.35   0
  -1  -9  -5  199.42    2.56   0
  -1  -8  -4    0.53    1.85   0
  -1  -5  -2   26.53    1.66   0
  -1   9  -8  152.51    3.56   0
  -1  10 -10   -0.28    3.07   0
  -1  11 -13    7.53    2.13   0
   0 -13 -10    0.40    2.24   0
   0 -12  -8   39.17    2.79   0
   0 -11  -6   66.40    2.03   0
   0 -10  -5   77.26    2.94   0
   0  -7  -2  694.02    4.38   0
   0  -2   0 4151.50   15.18   0
   0   5  -2  926.82    5.13   0
   0   8  -5    5.32    1.85   0
   0   9  -6  250.45    3.41   0
   0  10  -8    2.84    2.00   0
   0  11 -10    0.62    2.04   0
   0  12 -13   30.73    2.47   0
   1 -13  -8   17.83    2.13   0
   1 -12  -6    4.92    1.95   0
   1   5  -1 2325.93    7.21   0
   1   9  -5  251.41    2.84   0
   1  11  -8   30.25    2.39   0
   1  12 -10   55.09    3.02   0
   2 -13  -7   21.08    2.75   0
   2 -12  -5   18.29    2.17   0
   2  -7   0   15.51    2.04   0
   2  -5   1  849.63    5.58   0
   2   3   1  213.39    3.53   0
   2   5   0  176.09    2.80   0
   2   9  -4  720.89    3.92   0
   2  10  -5   45.92    2.81   0
   2  11  -7    7.03    2.13   0
   2  12  -9   55.11    2.35   0
   3 -13  -6   -2.40    2.44   0
   3 -11  -3    8.93    1.84   0
   3 -10  -2  136.26    2.93   0
   3  -9  -1   68.87    2.90   0
   3  -6   1  228.78    4.02   0
   3  -3   2  203.28    6.28   0
   3   1   2  162.83    2.97   0
   3   4   1  133.25    2.26   0
   3   7  -1   27.87    2.12   0
   3   8  -2   67.47    2.25   0
   3   9  -3   92.36    3.10   0
   3  11  -6    0.73    2.13   0
   3  12  -8    0.16    2.17   0
   4 -12  -4    5.45    2.79   0
   4   2   2 2399.90    7.72   0
   4   6   0  183.63    2.67   0
   4  10  -4    3.98    1.83   0
   4  12  -7    4.22    3.04   0
   5   6   0   63.04    2.19   0
   5  10  -4    3.81    2.04   0
   5  11  -5   80.54    3.42   0
   5  12  -7    6.89    2.28   0
   6   2   2  569.87    4.16   0
   6   6   0  101.61    2.42   0
   6  10  -4    5.22    2.19   0
   6  11  -5    1.67    2.58   0
   7 -10  -2   51.54    3.35   0
   7  -9  -1   -0.47    2.82   0
   7  -3   2   68.16    3.96   0
   7   1   2  218.75    3.72   0
   7   4   1   92.05    2.99   0
   7   7  -1    6.06    2.04   0
   7   8  -2   94.15    2.36   0
   7   9  -3   49.31    2.36   0
   7  10  -4   32.16    3.04   0
   8   3   1   14.98    2.86   0
   8   5   0   10.65    2.88   0
   9  -2   1   44.32    2.99   0
   9  -1   1   14.07    2.82   0
   9   0   1  130.35    3.36   0
   9   3   0    2.93    2.17   0
   9   5  -1   15.43    2.16   0
  10  -2   0   39.09    3.64   0
  10  -1   0    4.35    2.25   0
  10   1   0   10.52    2.67   0
  -5  -4 -17    0.86    4.14   0
  -5  -4 -16    1.07    2.93   0
  -5  -3 -15   26.81    3.58   0
  -5  -2 -14   85.91    3.46   0
  -5  -1 -14   14.84    3.87   0
  -5   0 -14    1.72    3.83   0
  -5   1 -14   12.29    2.96   0
  -5   2 -15   18.61    3.54   0
  -5   3 -17    1.02    3.90   0
  -4  -8 -15   16.14    2.38   0
  -4  -7 -14   32.59    3.31   0
  -4  -7 -13    3.80    2.01   0
  -4  -6 -12   20.88    3.14   0
  -4  -5 -10  253.53    3.23   0
  -4  -3  -9  125.38    2.74   0
  -3 -10 -14    9.80    2.37   0
  -3  -8 -10   19.65    1.96   0
  -3  -7  -9  224.13    3.54   0
  -3  -5  -7  421.49    3.81   0
  -3  -4  -6    1.41    1.92   0
  -3   6  -9    2.21    2.89   0
  -2 -11 -13   -1.45    2.93   0
  -2 -11 -12   -0.94    2.10   0
  -2 -10 -10   16.37    2.06   0
  -2  -9  -8   12.08    1.82   0
  -2  -7  -6  795.28    4.39   0
  -2  -6  -5   28.68    2.17   0
  -2  -1  -3   40.47    2.26   0
  -2   6  -6    2.59    3.00   0
  -2  10 -13    8.58    3.13   0
  -1 -12 -11    4.10    2.10   0
  -1 -11  -9   44.22    2.34   0
  -1 -10  -7   24.98    2.02   0
  -1  -9  -6    2.09    2.54   0
  -1  -6  -3  455.75    3.25   0
  -1  -4  -2 2131.56    7.35   0
  -1   6  -4   26.23    2.84   0
  -1   7  -5 1347.02    7.02   0
  -1  11 -12   -2.12    2.25   0
   0 -12  -9   16.36    3.01   0
   0 -11  -7   10.08    2.53   0
   0  -9  -4  960.56    4.37   0
   0  -8  -3  485.86    3.49   0
   0  -5  -1 2327.13    7.60   0
   0  -1   0    5.16    2.26   0
   0  11  -9   -2.44    2.92   0
   0  12 -12    8.16    2.25   0
   1 -13  -9    1.90    2.08   0
   1 -12  -7   16.17    1.91   0
   1 -11  -5   92.30    2.23   0
   1 -10  -4   41.37    2.12   0
   1  -9  -3  245.38    3.43   0
   1  -8  -2   84.39    2.88   0
   1  -7  -1   44.73    2.12   0
   1  -5   0  230.26    3.38   0
   1   0   1 1740.93   15.71   0
   1   8  -3   44.25    2.81   0
   1  10  -6   25.45    2.06   0
   2 -11  -4   25.01    1.91   0
   2 -10  -3   35.97    2.11   0
   2  -9  -2    0.82    2.50   0
   2  -8  -1    4.60    1.80   0
   2  11  -6  132.93    3.36   0
   2  12  -8    8.19    2.22   0
   2  13 -10    4.21    2.79   0
   3   2   2  174.06    3.21   0
   3   6   0   38.78    2.00   0
   3  10  -4   33.19    2.21   0
   3  11  -5   51.52    2.84   0
   3  12  -7    9.06    2.19   0
   3  13  -9    0.29    2.39   0
   4 -13  -6    8.59    2.34   0
   4 -11  -3    0.23    2.08   0
   4 -10  -2   10.22    2.51   0
   4  -9  -1    9.58    2.51   0
   4  -8   0   56.42    2.17   0
   4  -4   2 2934.03   18.70   0
   4   3   2  430.70    4.09   0
   4   5   1 1415.72    5.55   0
   4   9  -2    5.11    2.65   0
   4  11  -5   38.88    2.22   0
   5 -12  -4    5.80    2.06   0
   5 -11  -3   12.13    2.78   0
   5  -8   0   31.50    2.84   0
   5   3   2   39.64    2.09   0
   5   5   1   70.49    2.22   0
   5   7   0   11.47    2.92   0
   5   8  -1   15.73    2.02   0
   5   9  -2    2.29    1.85   0
   5  10  -3   -2.23    2.79   0
   5  12  -6    2.17    2.13   0
   6 -11  -3   11.89    2.82   0
   6  -8   0    6.88    2.39   0
   6   3   2   97.12    2.88   0
   6   5   1    3.39    2.01   0
   6   8  -1   39.57    2.08   0
   6   9  -2   -1.67    2.08   0
   6  10  -3   32.38    2.99   0
   7   2   2   68.81    3.15   0
   7   6   0   34.90    2.08   0
   8   7  -1    2.48    2.10   0
   8   8  -2   24.71    2.18   0
   8   9  -3    1.14    2.29   0
   9   1   1   12.25    2.06   0
   9   4   0   15.16    2.24   0
   9   6  -1    0.96    2.17   0
   9   7  -2    4.50    2.39   0
  10   2   0   47.22    3.48   0
  -5  -3 -17   -6.12    3.97   0
  -5  -3 -16   29.39    3.43   0
  -5  -2 -16    0.28    4.58   0
  -5  -2 -15   12.75    2.85   0
  -5  -1 -15   -0.75    3.90   0
  -5   1 -15   -0.25    3.44   0
  -5   2 -16   17.49    4.07   0
  -4  -7 -16   11.00    3.25   0
  -4  -7 -15    1.15    2.32   0
  -4  -5 -11   -1.28    1.92   0
  -4  -4 -10   10.75    2.28   0
  -4  -2  -9   57.23    2.26   0
  -4  -1  -9  348.83    4.48   0
  -4   0  -9   -3.19    3.08   0
  -4   1  -9  362.65    5.32   0
  -4   3 -10   17.99    3.96   0
  -4   7 -16   18.77    5.29   0
  -3  -9 -14   -1.45    3.07   0
  -3  -9 -13    3.71    2.16   0
  -3  -8 -11    4.53    1.93   0
  -3  -6  -8  219.66    2.81   0
  -3  -3  -6  409.01    3.57   0
  -3   7 -10  140.95    4.39   0
  -3   8 -12   55.51    3.55   0
  -3   9 -15   62.26    3.86   0
  -2 -10 -11   23.25    2.01   0
  -2  -9  -9   29.46    1.96   0
  -2  -4  -4  140.27    2.30   0
  -2   5  -5  635.52    6.04   0
  -2   7  -7    3.42    2.03   0
  -2   9 -10   50.25    2.89   0
  -2  10 -12    2.80    2.69   0
  -1 -12 -12    5.48    2.19   0
  -1 -11 -10   18.10    2.03   0
  -1 -10  -8    2.30    1.79   0
  -1  -7  -4  206.07    2.83   0
  -1   3  -2  656.91    6.51   0
  -1   5  -3 1205.33    6.62   0
  -1   8  -6   50.83    2.44   0
  -1   9  -7  542.05    4.61   0
  -1  10  -9   -0.52    2.00   0
  -1  11 -11    3.43    2.90   0
   0 -12 -10   19.26    3.06   0
   0 -11  -8   99.28    3.20   0
   0 -10  -6   46.08    2.10   0
   0  -6  -2    4.08    2.51   0
   0   4  -1  934.84    5.70   0
   0   7  -3  254.96    3.69   0
   0   8  -4   29.67    2.73   0
   0  10  -7    3.68    1.89   0
   0  12 -11    3.49    2.31   0
   1 -13 -10   12.13    2.21   0
   1 -12  -8    0.19    2.67   0
   1 -11  -6   28.48    2.02   0
   1   4   0 1208.80    5.79   0
   1   6  -1   51.88    2.86   0
   1   7  -2   73.19    2.20   0
   1   9  -4   32.33    2.13   0
   1  10  -5  107.88    3.17   0
   1  11  -7    1.84    2.09   0
   1  12  -9    4.50    2.30   0
   2 -13  -8   17.62    2.24   0
   2 -12  -6    7.85    1.84   0
   2 -11  -5   28.64    2.66   0
   2   4   1  308.95    3.58   0
   2   7  -1  268.33    2.96   0
   2   8  -2    8.79    2.00   0
   2   9  -3   55.40    2.19   0
   2  10  -4   25.24    2.16   0
   2  12  -7    0.35    2.75   0
   2  13  -9    0.24    2.62   0
   3 -13  -7   28.08    2.24   0
   3 -11  -4    3.93    2.48   0
   3  -7   0   15.83    2.76   0
   3   5   1   30.38    1.88   0
   3   9  -2    2.86    2.82   0
   3  12  -6    5.85    2.69   0
   3  13  -8   -0.17    2.97   0
   4 -12  -5   11.53    3.00   0
   4  -6   1  170.62    3.70   0
   4   7   0   66.59    2.29   0
   4  10  -3    1.60    1.87   0
   4  11  -4   25.60    2.16   0
   4  12  -6   -1.24    2.28   0
   5 -10  -2   47.82    2.39   0
   5  -9  -1    7.05    2.27   0
   5   4   2   23.63    2.61   0
   5   6   1    1.86    2.57   0
   5  11  -4    0.54    2.24   0
   5  12  -5    2.38    2.61   0
   6 -10  -2    5.32    2.20   0
   6  -9  -1    5.37    2.10   0
   6   4   2   41.68    2.78   0
   6   6   1   71.46    3.09   0
   6   7   0    4.89    2.00   0
   6  11  -4   13.99    2.24   0
   7   3   2   70.30    2.91   0
   7   5   1   12.79    1.92   0
   7   7   0   -2.38    2.03   0
   7   8  -1   66.08    2.21   0
   7   9  -2    1.48    2.22   0
   7  10  -3   10.53    2.28   0
   8  -8  -1   20.99    3.22   0
   8  -1   2    7.90    2.66   0
   8   0   2    3.03    2.51   0
   8   1   2    3.51    2.61   0
   8   4   1   72.22    2.52   0
   8   6   0    2.59    2.05   0
   8   9  -2   -4.08    2.71   0
   9  -3   1    4.93    3.05   0
   9   2   1   44.63    2.38   0
   9   3   1    3.45    2.64   0
   9   5   0   15.41    2.29   0
   9   7  -1    2.72    2.97   0
  -5  -2 -18   -3.38    5.71   0
  -5  -2 -17   -0.59    3.38   0
  -5  -1 -17   -1.12    5.48   0
  -5  -1 -16    3.54    3.46   0
  -5   0 -16    2.34    5.01   0
  -5   1 -16   -1.57    4.28   0
  -5   2 -17   -1.84    4.27   0
  -4  -6 -15   16.28    3.28   0
  -4  -6 -14   13.16    2.11   0
  -4  -5 -12    9.93    1.85   0
  -4  -4 -11   88.63    2.62   0
  -4  -3 -10   11.20    2.05   0
  -3  -9 -15   41.10    2.61   0
  -3  -8 -13   27.17    2.64   0
  -3  -8 -12   45.62    2.17   0
  -3  -7 -10  127.61    2.55   0
  -3  -6  -9   -5.27    2.00   0
  -3  -5  -8    4.91    2.52   0
  -3  -4  -7    7.84    2.14   0
  -3  -2  -6  130.09    2.60   0
  -3   2  -6  138.47    5.09   0
  -3   9 -14   -2.62    3.16   0
  -2 -10 -13    1.86    2.98   0
  -2 -10 -12    2.05    2.13   0
  -2  -9 -10   47.69    2.00   0
  -2  -8  -8   11.95    1.95   0
  -2  -7  -7    3.93    1.88   0
  -2  -6  -6    1.72    2.15   0
  -2  -5  -5  582.46    3.77   0
  -2  -3  -4 1117.16    5.79   0
  -2   8  -8   12.51    2.43   0
  -1 -11 -11    2.49    2.15   0
  -1  -9  -7  484.73    3.41   0
  -1  -8  -6   48.52    2.80   0
  -1  -5  -3 1123.65    4.91   0
  -1  -3  -2  672.11    4.83   0
   0 -12 -11    1.61    2.13   0
   0  -9  -5    7.55    1.83   0
   0  -8  -4   33.03    1.98   0
   0  -7  -3  227.26    2.72   0
   0  -4  -1  942.34    5.70   0
   0   6  -2    1.90    2.00   0
   0   9  -5    0.67    2.08   0
   0  10  -6   53.78    2.96   0
   0  11  -8   94.53    2.71   0
   0  12 -10   24.65    2.33   0
   1 -12  -9   -0.54    2.88   0
   1 -10  -5  101.48    2.35   0
   1  -6  -1   52.50    2.85   0
   1   1   1   40.01    2.26   0
   1  11  -6   30.93    2.59   0
   1  12  -8    0.18    1.95   0
   1  13 -10    6.60    3.13   0
   2 -13  -9    0.56    2.14   0
   2 -12  -7    1.47    1.91   0
   2 -10  -4   23.13    2.71   0
   2  -6   0  351.15    3.55   0
   2  -4   1  310.92    4.44   0
   2   6   0  356.67    2.99   0
   2  11  -5   23.38    1.98   0
   3 -13  -8   -0.54    2.12   0
   3 -12  -6   -2.73    2.12   0
   3 -10  -3   20.56    1.96   0
   3  -9  -2    5.79    2.83   0
   3  -8  -1  205.89    3.31   0
   3   3   2  174.47    2.53   0
   3   7   0   13.67    2.06   0
   3  10  -3   26.64    1.94   0
   3  11  -4    3.98    2.10   0
   3  13  -7   21.89    2.70   0
   4 -11  -4   23.20    2.83   0
   4   4   2 2749.78    7.66   0
   4   6   1  188.52    2.63   0
   4   9  -1    9.40    2.62   0
   4  10  -2    6.16    2.36   0
   4  12  -5    1.63    2.17   0
   4  13  -7    5.35    2.46   0
   5 -12  -5   -2.15    2.21   0
   5   0   3 1085.56    6.99   0
   5   8   0   29.24    2.10   0
   5   9  -1   10.44    1.87   0
   5  10  -2   58.66    2.30   0
   5  11  -3    5.89    2.78   0
   6   8   0   14.27    2.60   0
   6   9  -1    7.01    2.00   0
   6  10  -2    1.20    2.03   0
   6  11  -3    1.39    2.89   0
   7   4   2    3.22    2.80   0
   7   6   1   42.80    2.14   0
   7   9  -1    1.46    2.63   0
   7  10  -2   56.47    2.73   0
   8  -9  -2    1.34    2.84   0
   8  -2   2   30.63    3.06   0
   8   2   2   31.79    2.26   0
   8   5   1    5.95    2.10   0
   8   7   0    0.50    2.09   0
   8   8  -1   17.51    2.20   0
   9   4   1   29.01    3.04   0
   9   6   0   24.25    2.33   0
  -5  -1 -18   -2.02    4.31   0
  -5   0 -18    2.65    5.14   0
  -5   0 -17   -8.25    4.30   0
  -5   1 -18    7.63    5.37   0
  -5   1 -17   -3.26    4.03   0
  -5   2 -18    0.10    3.80   0
  -4  -6 -17   -4.13    2.86   0
  -4  -6 -16    0.71    2.33   0
  -4  -5 -14    5.59    3.03   0
  -4  -5 -13    2.27    2.11   0
  -4  -4 -12   51.65    2.41   0
  -4  -3 -11    9.84    2.32   0
  -4  -2 -10  144.81    2.91   0
  -4  -1 -10   73.96    3.47   0
  -4   4 -11  106.61    6.70   0
  -3  -8 -14   13.51    2.14   0
  -3  -7 -12   40.46    2.70   0
  -3  -7 -11   41.27    2.19   0
  -3  -6 -10  201.94    3.27   0
  -3  -3  -7  146.68    3.38   0
  -3  -1  -6   59.13    2.40   0
  -2 -10 -15    4.79    2.78   0
  -2 -10 -14    3.40    1.97   0
  -2  -9 -11   14.25    2.08   0
  -2  -8  -9    6.34    1.95   0
  -2  -7  -8  145.76    3.05   0
  -2   9  -9   28.48    3.01   0
  -2  10 -11   35.48    2.96   0
  -1 -11 -13    3.03    2.46   0
  -1 -11 -12   -1.32    2.17   0
  -1 -10 -10    3.16    2.03   0
  -1  -9  -8  148.16    2.58   0
  -1  -7  -5 1289.06    5.25   0
  -1  -6  -4   22.64    1.82   0
  -1   7  -4  218.16    3.89   0
  -1   8  -5  540.15    4.66   0
  -1  10  -8    4.85    2.00   0
  -1  11 -10   12.92    2.06   0
  -1  12 -12   18.96    3.18   0
   0 -12 -12   12.01    2.18   0
   0 -11  -9   -3.32    2.04   0
   0 -10  -7    4.22    1.91   0
   0  -9  -6  218.30    3.20   0
   0   1   0    4.31    1.66   0
   0  11  -7   12.11    2.55   0
   0  12  -9   23.32    3.29   0
   1 -12 -10   47.98    3.19   0
   1 -11  -7    2.86    1.89   0
   1  -9  -4   36.99    1.99   0
   1  -8  -3   39.42    2.04   0
   1  -7  -2   76.81    2.22   0
   1  -4   0 1225.19    6.90   0
   1   2   1 2704.24   10.72   0
   1   5   0  229.09    2.74   0
   1   7  -1   41.54    2.68   0
   1   8  -2   79.39    2.41   0
   1   9  -3  247.80    2.84   0
   1  10  -4   41.92    3.08   0
   1  12  -7   18.72    2.74   0
   1  13  -9    2.48    3.07   0
   2 -13 -10   -1.39    2.24   0
   2 -12  -8    3.90    2.62   0
   2 -11  -6  126.03    2.57   0
   2  -9  -3   56.89    2.11   0
   2  -8  -2    6.11    1.83   0
   2  -7  -1  264.67    3.11   0
   2   5   1  903.17    4.62   0
   2   8  -1    6.44    1.97   0
   2   9  -2    0.21    1.99   0
   2  10  -3   45.31    2.12   0
   2  11  -4   27.72    2.47   0
   2  12  -6   -0.80    1.91   0
   2  13  -8   21.75    2.15   0
   3 -13  -9    4.75    2.38   0
   3 -12  -7   -1.40    2.79   0
   3 -11  -5   43.17    2.24   0
   3  -5   1   29.69    2.65   0
   3   4   2   54.39    2.77   0
   3   6   1  225.45    2.75   0
   3   9  -1   80.97    3.18   0
   3  10  -2  145.73    2.94   0
   3  12  -5    9.71    2.04   0
   4 -12  -6   -1.74    2.17   0
   4 -10  -3    5.81    2.30   0
   4  -7   0   73.07    3.09   0
   4   5   2   38.42    2.33   0
   4   7   1   27.23    2.76   0
   4   8   0   61.11    1.98   0
   4  11  -3   -0.38    2.06   0
   4  12  -4   -0.13    2.94   0
   4  13  -6    3.25    2.19   0
   5 -11  -4    6.11    2.02   0
   5  -6   1   -0.01    2.62   0
   5  -1   3  335.30    4.94   0
   5   1   3  327.50    3.79   0
   5   2   3  142.60    3.33   0
   5   5   2    3.17    1.94   0
   5   7   1    4.14    2.12   0
   5  12  -4    6.07    2.15   0
   6 -11  -4   16.01    2.53   0
   6  -6   1   67.75    3.54   0
   6  -1   3   45.12    2.87   0
   6   0   3    3.37    2.01   0
   6   1   3   45.69    2.33   0
   6   2   3    9.40    2.90   0
   6   5   2    9.24    1.95   0
   6   7   1   27.58    2.06   0
   7 -10  -3    4.79    2.97   0
   7  -7   0    0.77    3.10   0
   7   5   2   48.07    2.75   0
   7   8   0   34.60    2.05   0
   8   3   2   26.77    2.29   0
   8   4   2   31.72    2.66   0
   8   6   1    2.27    1.92   0
   8   9  -1    1.38    2.31   0
   9   5   1   -3.79    2.72   0
  10  -1   1   -0.62    2.93   0
  10   0   1    2.20    3.16   0
  10   1   1    3.26    2.42   0
  10   2   1    5.16    3.25   0
  -4  -5 -16   20.51    3.42   0
  -4  -5 -15    1.12    2.00   0
  -4  -4 -13   13.16    2.01   0
  -4  -3 -12    7.07    2.85   0
  -4  -2 -11  256.65    4.38   0
  -4   0 -10  297.22    4.79   0
  -4   1 -10   70.64    3.75   0
  -4   2 -10  154.81    4.45   0
  -3  -8 -16   -1.12    2.16   0
  -3  -8 -15   15.11    2.22   0
  -3  -7 -13   12.78    2.61   0
  -3  -6 -11    3.00    2.81   0
  -3  -5  -9   59.18    2.26   0
  -3  -4  -8   11.34    1.93   0
  -3   0  -6    3.91    1.90   0
  -3   1  -6   59.59    3.36   0
  -3   8 -11    0.75    2.17   0
  -3   9 -13    0.92    3.28   0
  -2  -9 -13   10.63    2.23   0
  -2  -9 -12    1.72    2.03   0
  -2  -8 -10   22.27    1.93   0
  -2  -6  -7  298.31    3.01   0
  -2  -5  -6  641.49    4.00   0
  -2  -4  -5 2126.07    6.98   0
  -2  -2  -4  462.61    4.25   0
  -2   4  -4  140.31    3.85   0
  -2   7  -6  845.18    5.93   0
  -2  11 -13    2.37    2.28   0
  -1 -11 -14    2.79    2.05   0
  -1 -10 -11   -0.65    1.95   0
  -1  -9  -9    1.63    2.24   0
  -1  -8  -7    2.53    1.87   0
  -1  -4  -3  414.00    3.56   0
  -1  -2  -2 1331.59    7.52   0
  -1   4  -2 2257.59    9.89   0
  -1   6  -3  482.76    4.42   0
  -1   9  -6    0.61    2.24   0
  -1  11  -9   45.04    3.32   0
  -1  12 -11    8.99    2.68   0
   0 -12 -13   29.44    2.32   0
   0 -11 -11    5.76    2.69   0
   0 -11 -10    1.41    1.83   0
   0 -10  -8    6.65    1.88   0
   0  -8  -5    9.04    1.84   0
   0  -5  -2  903.07    4.75   0
   0   2   0 4086.39   15.51   0
   0   5  -1 2462.74    7.91   0
   0   7  -2  728.88    4.69   0
   0   8  -3  483.75    3.65   0
   0   9  -4  962.85    4.79   0
   0  10  -5   88.28    3.21   0
   1 -12 -11   -2.77    2.88   0
   1 -11  -8   29.75    2.10   0
   1 -10  -6   24.04    2.00   0
   1   3   1  349.63    4.27   0
   1  11  -5   86.93    2.36   0
   2 -12  -9   58.81    3.04   0
   2 -10  -5   36.18    2.62   0
   2   0   2 2546.83   13.50   0
   2   1   2  201.98    3.56   0
   2   2   2 3991.86   11.33   0
   2   7   0   11.72    1.91   0
   2  12  -5   17.21    3.03   0
   2  13  -7   20.42    2.35   0
   3 -10  -4   29.34    2.08   0
   3   8   0   80.85    2.31   0
   3  11  -3    3.94    2.04   0
   3  12  -4   35.67    2.74   0
   3  13  -6   -5.52    2.19   0
   4 -11  -5   35.40    2.93   0
   4  -9  -2    5.55    1.86   0
   4  -8  -1   55.74    2.12   0
   4   0   3    0.80    1.83   0
   4   1   3 1026.28    5.74   0
   4   2   3   35.62    2.02   0
   4   9   0   13.88    2.51   0
   4  10  -1   18.20    2.69   0
   4  11  -2   61.61    2.77   0
   4  13  -5   -2.66    2.32   0
   5 -12  -6   -0.09    2.19   0
   5 -10  -3    1.84    1.97   0
   5   3   3  189.25    2.79   0
   5   6   2  183.14    2.60   0
   5   8   1   82.89    2.67   0
   5   9   0   -1.14    1.90   0
   5  10  -1   63.86    2.36   0
   5  11  -2    8.64    2.01   0
   5  12  -3   16.86    2.91   0
   6 -10  -3   20.53    2.79   0
   6   3   3  117.09    2.58   0
   6   6   2   39.54    2.13   0
   6   8   1   -1.72    2.67   0
   6   9   0    9.11    2.11   0
   6  10  -1   44.98    2.24   0
   6  11  -2   46.17    2.29   0
   6  12  -3   -0.54    2.44   0
   7  -9  -2    2.33    2.89   0
   7  -8  -1   73.99    3.29   0
   7   0   3   22.01    2.98   0
   7   1   3   15.65    2.09   0
   7   2   3   89.49    3.10   0
   7   6   2   -0.17    2.60   0
   7   9   0    0.76    3.04   0
   7  10  -1   -0.69    2.18   0
   8  -3   2   27.18    3.59   0
   8   5   2   -4.71    2.73   0
   8   7   1    0.32    2.97   0
   8   8   0   -2.55    2.09   0
   9  -1   2   21.01    2.77   0
   9   0   2    3.10    2.19   0
   9   1   2   22.04    2.32   0
   9   2   2    3.24    2.10   0
   9   3   2    4.25    2.67   0
   9   6   1   -3.31    3.00   0
  -4  -5 -18    9.84    2.69   0
  -4  -5 -17   14.07    2.37   0
  -4  -4 -15   -3.24    2.94   0
  -4  -4 -14   69.76    2.72   0
  -4  -3 -13   16.10    3.02   0
  -4  -2 -12  150.29    3.80   0
  -4  -1 -11   55.99    3.35   0
  -3  -7 -15    2.13    2.70   0
  -3  -7 -14   20.12    2.15   0
  -3  -6 -12   10.49    2.51   0
  -3  -5 -10  301.53    3.17   0
  -3  -4  -9   25.60    2.62   0
  -3  -3  -8   28.33    3.05   0
  -3  -2  -7   47.58    2.19   0
  -3   6  -8  226.56    5.02   0
  -3   7  -9  212.53    4.65   0
  -2  -9 -15    1.31    2.64   0
  -2  -9 -14   19.78    2.23   0
  -2  -8 -11   22.06    1.94   0
  -2  -7  -9   23.36    1.98   0
  -2   6  -5   29.63    3.02   0
  -2   8  -7   77.11    2.50   0
  -2   9  -8    9.29    2.86   0
  -2  10 -10   17.62    2.24   0
  -2  11 -12    3.16    3.20   0
  -1 -10 -13   15.46    2.96   0
  -1 -10 -12   10.76    1.85   0
  -1  -9 -10   61.07    2.60   0
  -1  -8  -8  496.74    3.94   0
  -1  -7  -6   72.03    2.29   0
  -1  -6  -5    2.06    1.73   0
  -1  -5  -4   64.68    1.99   0
  -1  10  -7   25.47    2.25   0
   0 -11 -12    1.65    2.07   0
   0 -10  -9   -2.11    1.83   0
   0  -9  -7    2.09    1.90   0
   0  -7  -4  490.67    3.50   0
   0  -6  -3 1397.84    5.56   0
   0  -3  -1  574.96    5.21   0
   0  11  -6   75.02    2.16   0
   0  12  -8   48.11    2.25   0
   0  13 -10    1.59    2.19   0
   1 -12 -12   10.65    2.15   0
   1 -11  -9   22.57    2.19   0
   1 -10  -7   14.35    2.02   0
   1  -9  -5  250.13    2.73   0
   1  -8  -4   44.13    2.73   0
   1  -5  -1 2374.37    8.09   0
   1   6   0  325.86    3.07   0
   1   9  -2   53.09    2.23   0
   1  10  -3    6.44    2.82   0
   1  12  -6    1.16    2.28   0
   1  13  -8   16.59    2.29   0
   2 -12 -10    8.66    2.79   0
   2 -11  -7    2.90    2.06   0
   2  -9  -4  677.48    3.96   0
   2  -5   0  177.09    3.25   0
   2   3   2 2570.98    8.26   0
   2   6   1   94.03    2.11   0
   2   9  -1  336.41    3.02   0
   2  10  -2   60.74    2.30   0
   2  11  -3   14.19    1.89   0
   2  13  -6    5.58    2.20   0
   3 -12  -8    0.95    2.09   0
   3 -11  -6    1.44    2.03   0
   3  -9  -3   90.07    2.55   0
   3  -6   0   40.03    2.85   0
   3   5   2   55.96    2.00   0
   3   7   1  324.22    2.93   0
   3  10  -1   12.83    2.54   0
   3  11  -2   -0.80    2.71   0
   3  13  -5   19.70    2.25   0
   4 -12  -7    0.08    2.06   0
   4  -1   3  999.30    8.02   0
   4   3   3    4.20    1.95   0
   4   6   2   43.45    2.17   0
   4   8   1    6.80    2.01   0
   4  12  -3    5.09    2.27   0
   4  13  -4   22.38    2.68   0
   5 -12  -7   15.63    3.03   0
   5 -11  -5   73.92    3.04   0
   5  -9  -2    4.74    1.84   0
   5  -8  -1   10.08    2.66   0
   5  -7   0    6.70    2.60   0
   5   4   3    1.56    1.80   0
   5   7   2   61.84    2.94   0
   6 -11  -5    1.30    2.85   0
   6  -9  -2   -0.25    2.09   0
   6  -8  -1   35.15    2.79   0
   6  -7   0    2.92    2.70   0
   6   4   3   13.17    2.19   0
   6   7   2   10.05    2.62   0
   6  11  -1    3.64    2.71   0
   7  -1   3   16.11    2.97   0
   7   3   3   15.46    1.96   0
   7   8   1   -0.60    1.96   0
   8   1   3  144.00    3.37   0
   8   6   2   22.93    2.84   0
   8   9   0    2.13    2.38   0
   9  -4   1   17.72    4.06   0
   9   4   2    2.45    2.21   0
  10  -2   1    1.15    3.19   0
  -4  -4 -18    3.74    2.86   0
  -4  -4 -17    3.82    2.47   0
  -4  -4 -16    6.67    2.30   0
  -4  -3 -14    3.08    2.15   0
  -4   0 -11    0.93    3.01   0
  -3  -7 -16    1.60    2.38   0
  -3  -6 -13   16.91    1.83   0
  -3  -1  -7  814.99    5.79   0
  -3   8 -10   19.80    2.75   0
  -3   9 -12    6.33    2.96   0
  -2  -9 -16   37.37    2.40   0
  -2  -8 -13   -0.11    2.56   0
  -2  -8 -12   94.49    2.26   0
  -2  -7 -10    6.51    2.04   0
  -2  -6  -8  203.71    2.54   0
  -2  -5  -7   87.32    2.24   0
  -2  -4  -6  451.88    3.50   0
  -2  -3  -5 2271.47    7.42   0
  -2  -1  -4  548.19    5.03   0
  -2  10  -9   43.56    3.03   0
  -2  11 -11    3.51    2.85   0
  -1 -10 -15    0.65    2.93   0
  -1 -10 -14   -2.45    2.10   0
  -1  -9 -11    2.22    1.79   0
  -1  -8  -9   10.80    2.75   0
  -1  -7  -7   79.86    2.67   0
  -1   5  -2   23.73    2.59   0
  -1   8  -4   -2.43    1.87   0
  -1   9  -5  220.35    2.94   0
  -1  10  -6   40.52    2.60   0
  -1  11  -8   65.32    2.60   0
  -1  12 -10   27.73    2.38   0
   0 -11 -14    3.60    2.88   0
   0 -11 -13    0.79    2.02   0
   0 -10 -10    2.67    2.04   0
   0  -9  -8   67.22    2.65   0
   0  -8  -6    0.23    1.86   0
   0   3   0   -0.02    1.91   0
   0   6  -1  423.76    3.44   0
   0   9  -3   -0.41    2.75   0
   0  10  -4   43.15    2.91   0
   0  12  -7   -1.11    2.01   0
   0  13  -9    5.73    2.23   0
   1 -12 -13    3.13    2.16   0
   1 -11 -10   13.63    1.87   0
   1 -10  -8   14.55    2.61   0
   1  -9  -6    1.31    2.64   0
   1  -7  -3   99.61    2.34   0
   1  -6  -2 2661.10    7.77   0
   1   4   1 1757.40    6.76   0
   1   7   0  218.70    3.09   0
   1   8  -1  241.70    2.85   0
   1  11  -4    9.70    1.83   0
   1  12  -5   -7.14    2.74   0
   1  13  -7    4.69    2.24   0
   2 -12 -11   27.10    2.09   0
   2 -11  -8   89.83    2.50   0
   2 -10  -6   16.89    1.90   0
   2  -8  -3  298.66    2.96   0
   2  -7  -2  675.89    4.85   0
   2  -6  -1   12.72    2.56   0
   2   4   2   90.80    2.15   0
   2   8   0  162.96    2.44   0
   2  12  -4    3.53    2.14   0
   2  13  -5    4.81    2.72   0
   3 -12  -9   10.00    2.13   0
   3 -11  -7   48.47    2.88   0
   3 -10  -5    2.62    1.88   0
   3  -8  -2   58.46    2.36   0
   3  -7  -1   24.94    2.15   0
   3   2   3  285.66    3.50   0
   3   6   2 1379.44    5.33   0
   3   8   1  145.08    2.52   0
   3   9   0    2.65    1.96   0
   3  13  -4   13.88    2.91   0
   4 -12  -8   18.59    2.06   0
   4 -11  -6   43.58    2.12   0
   4 -10  -4   -3.04    1.78   0
   4   4   3  342.11    3.24   0
   4   5   3   24.89    2.72   0
   4   7   2    4.12    2.02   0
   4  10   0    6.65    1.92   0
   4  11  -1   -0.04    2.06   0
   4  12  -2   -0.01    2.98   0
   5 -10  -4    8.00    2.67   0
   5  -4   2   30.80    4.38   0
   5  -2   3  139.76    4.82   0
   5   5   3   63.97    2.25   0
   5   9   1   27.01    1.98   0
   5  10   0   63.10    2.39   0
   5  11  -1    1.52    1.94   0
   5  12  -2   18.15    2.15   0
   6  -2   3    6.35    2.93   0
   6   5   3   19.61    2.05   0
   6   9   1    8.81    2.07   0
   6  10   0    0.32    2.18   0
   6  12  -2    3.32    2.47   0
   7 -10  -4   27.16    3.08   0
   7   5   3    9.55    1.83   0
   7   7   2    1.52    2.05   0
   7   9   1    2.41    2.22   0
   7  10   0   21.23    2.26   0
   8   0   3    2.01    2.67   0
   8   2   3   22.32    2.22   0
   8   3   3   20.35    2.21   0
   8   4   3    3.73    2.80   0
   8   7   2    4.54    2.68   0
   8   8   1   -0.89    2.09   0
   9  -2   2    3.44    2.65   0
   9   5   2   -5.18    2.07   0
  -4  -3 -17   30.67    3.50   0
  -4  -3 -16    4.34    2.24   0
  -4  -3 -15    1.21    2.44   0
  -4  -2 -14   23.68    3.09   0
  -4  -2 -13    6.71    2.18   0
  -4  -1 -12   28.91    2.42   0
  -4   1 -11   51.55    3.53   0
  -4   2 -11  258.81    5.75   0
  -4   3 -11   10.13    4.11   0
  -3  -6 -16   -0.93    3.03   0
  -3  -6 -15    1.37    2.20   0
  -3  -6 -14    5.16    2.11   0
  -3  -5 -12  166.92    2.83   0
  -3  -4 -10   99.91    2.53   0
  -3  -3  -9  241.93    3.69   0
  -3  -2  -8   20.02    2.90   0
  -3   5  -7  428.48    7.55   0
  -3  10 -14    5.98    3.18   0
  -2  -8 -15    3.52    2.68   0
  -2  -8 -14    0.55    2.01   0
  -2  -7 -11   45.26    2.21   0
  -2  -6  -9    1.36    1.97   0
  -2   5  -4   15.95    2.60   0
  -2   8  -6  394.39    4.31   0
  -1 -10 -16    0.20    2.32   0
  -1  -9 -12    1.05    2.01   0
  -1  -6  -6  248.60    2.88   0
  -1  -5  -5 1693.63    6.36   0
  -1  -3  -3  518.60    4.23   0
  -1  -1  -2 5490.74   17.40   0
  -1   7  -3  787.06    4.83   0
  -1  11  -7   57.17    3.15   0
  -1  12  -9    2.35    2.30   0
   0 -10 -11    2.21    2.05   0
   0  -9  -9    8.16    2.53   0
   0  -8  -7    0.88    2.68   0
   0  -7  -5  122.98    2.65   0
   0  -6  -4  538.16    3.97   0
   0  -4  -2 1628.42    6.81   0
   0   4   0 3031.39    9.80   0
   0   8  -2  148.84    2.54   0
   0  11  -5   17.60    2.04   0
   0  13  -8   20.74    3.15   0
   1 -11 -12   14.02    2.82   0
   1 -11 -11   -2.88    1.97   0
   1  -8  -5    5.26    2.51   0
   1   5   1 1055.88    4.93   0
   1   9  -1   12.33    2.66   0
   1  10  -2   -0.96    2.91   0
   1  11  -3   41.36    2.92   0
   1  13  -6   14.95    2.23   0
   2 -12 -12    1.39    2.07   0
   2 -11  -9    9.80    2.12   0
   2 -10  -7    7.62    2.68   0
   2  -9  -5   14.96    2.15   0
   2   5   2  185.33    2.45   0
   2   7   1  814.61    4.20   0
   2   9   0  153.59    3.13   0
   2  10  -1   83.30    2.39   0
   2  11  -2  152.00    2.48   0
   2  12  -3   -1.37    2.82   0
   2  14  -6   -1.78    2.85   0
   3 -12 -10   23.20    2.08   0
   3  -9  -4   66.06    3.09   0
   3   1   3  985.00    5.97   0
   3   3   3  116.95    2.25   0
   3   4   3 1279.06    5.51   0
   3   7   2    8.24    2.71   0
   3  10   0   52.59    2.76   0
   3  11  -1   -0.90    2.01   0
   3  12  -2   59.27    3.11   0
   4  -9  -3   81.73    2.36   0
   4  -5   1 1468.79    9.17   0
   4   8   2    0.09    2.77   0
   4   9   1   36.43    2.02   0
   4  13  -3    8.97    2.24   0
   5 -12  -8   -1.16    2.37   0
   5 -11  -6    6.74    2.06   0
   5   6   3   60.23    2.11   0
   5   8   2   14.82    1.89   0
   5  11   0    3.62    2.72   0
   5  12  -1    0.57    2.99   0
   6 -11  -6   16.58    2.98   0
   6 -10  -4    2.49    2.21   0
   6   6   3   20.80    2.03   0
   6   8   2   36.89    2.17   0
   6  10   1   35.17    3.04   0
   6  11   0   -0.04    2.17   0
   6  12  -1    7.34    2.57   0
   7  -2   3   84.35    3.95   0
   7   6   3   67.21    2.41   0
   7   8   2   17.09    1.97   0
   8  -9  -3   -0.12    2.28   0
   8  -1   3  139.93    3.65   0
   8   5   3    0.14    1.90   0
   8   9   1   -0.21    2.38   0
   9   2   3   25.03    2.75   0
   9   6   2   66.35    2.53   0
  10   0   2   27.95    3.42   0
  10   1   2    5.45    2.41   0
  -4  -3 -19    7.61    2.73   0
  -4  -3 -18    9.12    2.62   0
  -4  -2 -16    3.40    3.45   0
  -4  -2 -15   -0.23    2.52   0
  -4  -1 -13    4.26    2.14   0
  -4   0 -12  146.90    3.71   0
  -3  -6 -18    1.48    2.32   0
  -3  -6 -17   -0.55    2.34   0
  -3  -5 -14    4.37    2.62   0
  -3  -5 -13    3.54    2.15   0
  -3  -4 -11   85.27    2.39   0
  -3   0  -7  977.42    6.89   0
  -3   9 -11   41.75    3.52   0
  -3  10 -13   15.77    3.01   0
  -2  -8 -17    1.55    2.17   0
  -2  -8 -16   -0.15    2.27   0
  -2  -7 -13   12.50    2.54   0
  -2  -7 -12    4.17    2.01   0
  -2  -6 -10   11.39    1.95   0
  -2  -5  -8   83.62    2.26   0
  -2  -4  -7    3.68    2.49   0
  -2  -2  -5   23.71    1.96   0
  -2   7  -5   10.77    2.18   0
  -2   9  -7   90.36    2.77   0
  -2  10  -8   42.51    3.04   0
  -2  11 -10    6.18    2.38   0
  -2  12 -12   -0.21    3.24   0
  -1  -9 -15   56.59    3.13   0
  -1  -9 -14    0.37    2.07   0
  -1  -9 -13   13.98    1.96   0
  -1  -8 -11   27.01    2.50   0
  -1  -8 -10   47.46    2.12   0
  -1  -7  -8   84.31    2.18   0
  -1  -4  -4  128.90    2.31   0
  -1   6  -2   63.43    3.02   0
  -1   9  -4  250.34    3.60   0
  -1  10  -5   45.29    2.95   0
  -1  12  -8    4.82    2.59   0
   0 -10 -13   40.24    2.19   0
   0 -10 -12   62.14    2.32   0
   0  -5  -3   22.97    1.75   0
   0   5   0    2.20    1.85   0
   0   7  -1 1137.18    5.06   0
   0  10  -3  185.31    3.57   0
   0  12  -6    1.32    2.16   0
   1 -11 -13    6.58    2.19   0
   1 -10 -10   70.72    3.04   0
   1 -10  -9   11.57    1.79   0
   1  -9  -7  160.23    2.67   0
   1  -7  -4    2.87    2.62   0
   1  -3   0 5540.60   16.08   0
   1   6   1    2.59    1.80   0
   1   8   0  171.58    2.67   0
   1  12  -4   11.57    2.18   0
   1  13  -5   -4.08    2.70   0
   1  14  -7    3.52    3.39   0
   2 -11 -10    0.72    1.88   0
   2  -8  -4   72.81    2.92   0
   2  -3   1  210.89    4.57   0
   2   6   2  191.94    2.51   0
   2   8   1    5.80    1.98   0
   2  13  -4   20.11    2.26   0
   3 -12 -11   14.57    2.12   0
   3 -11  -8    4.39    2.16   0
   3 -10  -6   12.65    1.84   0
   3  -8  -3  185.19    3.34   0
   3   0   3  289.18    4.43   0
   3   5   3  704.78    3.95   0
   3   9   1    3.29    1.95   0
   3  13  -3    3.78    2.35   0
   4 -12 -10    5.02    2.18   0
   4 -11  -7    5.64    1.87   0
   4 -10  -5    7.54    1.89   0
   4  -8  -2   13.86    1.87   0
   4  -7  -1  355.35    4.17   0
   4  -6   0  187.01    3.79   0
   4   6   3    5.90    1.94   0
   4  10   1   57.52    2.09   0
   4  11   0   16.05    2.15   0
   4  12  -1   56.83    2.47   0
   4  13  -2    0.05    2.24   0
   5  -9  -3   86.26    2.48   0
   5   1   4  138.22    3.22   0
   5   2   4  206.70    2.96   0
   5   3   4   95.00    2.28   0
   5   4   4   51.65    2.83   0
   5   7   3  164.15    2.55   0
   5   9   2   -3.75    1.79   0
   5  10   1    0.22    2.07   0
   6  -9  -3    2.94    2.83   0
   6   1   4   37.01    2.80   0
   6   2   4   50.20    2.15   0
   6   3   4  522.49    3.90   0
   6   4   4  104.25    2.62   0
   6   7   3   21.20    1.98   0
   6   9   2    8.41    2.04   0
   7  -9  -3   43.62    2.99   0
   7   2   4    0.46    2.59   0
   7   3   4   37.68    2.91   0
   7   4   4    5.71    2.44   0
   7   7   3   12.97    2.08   0
   7   9   2    3.27    2.22   0
   7  10   1    8.19    2.13   0
   8  -8  -2   20.81    2.85   0
   8   6   3    7.93    2.25   0
   8   8   2    1.49    2.08   0
   9   1   3    6.45    2.25   0
   9   3   3   -0.71    2.21   0
   9   4   3    3.15    2.22   0
   9   5   3   -1.31    2.59   0
  -4  -2 -19    0.83    2.61   0
  -4  -2 -18   -1.18    2.52   0
  -4  -2 -17   -3.92    2.61   0
  -4  -1 -14    6.18    2.39   0
  -4   0 -13    1.88    3.26   0
  -4   1 -12   26.60    3.43   0
  -3  -5 -17   41.65    3.32   0
  -3  -5 -16    5.04    2.46   0
  -3  -5 -15    5.57    2.05   0
  -3  -4 -12    9.41    2.14   0
  -3  -3 -10  203.10    2.93   0
  -3  -2  -9   80.70    3.08   0
  -3  -1  -8  123.03    3.33   0
  -3   7  -8   47.22    3.79   0
  -3   8  -9    1.38    3.18   0
  -2  -7 -15    5.44    2.86   0
  -2  -7 -14   15.70    2.16   0
  -2  -6 -11   28.13    2.20   0
  -2  -5  -9  256.66    2.78   0
  -2  -3  -6  235.25    2.87   0
  -2  11  -9    4.70    2.52   0
  -1  -9 -17    5.94    2.21   0
  -1  -8 -12   23.22    1.93   0
  -1  -7  -9  289.01    2.93   0
  -1  -6  -7   83.17    2.32   0
  -1   8  -3   58.96    2.18   0
  -1  11  -6   -2.03    2.11   0
  -1  13 -10   -1.50    2.55   0
   0 -10 -16   -7.85    2.86   0
   0 -10 -15    4.30    2.05   0
   0 -10 -14    5.04    2.19   0
   0  -9 -11   13.02    2.31   0
   0  -8  -8  175.26    2.50   0
   0  -7  -6 2874.63    7.27   0
   0   6   0   86.22    2.74   0
   0   8  -1  130.62    3.20   0
   0   9  -2   -3.31    2.02   0
   0  11  -4    1.94    2.05   0
   0  12  -5   39.04    2.36   0
   0  13  -7    5.32    2.36   0
   1 -11 -15   13.53    2.51   0
   1 -11 -14    0.41    2.12   0
   1 -10 -11    6.30    2.80   0
   1  -9  -8   46.38    2.16   0
   1  -8  -6  123.42    2.38   0
   1  -6  -3 1404.70    5.79   0
   1  -4  -1   45.84    2.77   0
   1   7   1    8.86    2.51   0
   1  10  -1   58.29    3.14   0
   1  11  -2   -3.45    2.11   0
   1  12  -3   37.42    2.83   0
   1  14  -6    0.45    2.66   0
   2 -11 -11   10.66    2.12   0
   2 -10  -8   -0.83    1.79   0
   2  -9  -6  179.20    2.75   0
   2  -7  -3  538.00    4.49   0
   2  -1   2  150.80    6.30   0
   2   7   2  309.72    3.70   0
   2  10   0   82.24    2.33   0
   2  11  -1   38.06    2.05   0
   2  12  -2    2.80    2.11   0
   2  13  -3    5.73    3.02   0
   2  14  -5    2.09    2.26   0
   3 -11  -9   33.57    2.14   0
   3 -10  -7   -2.65    2.41   0
   3  -9  -5    7.00    2.72   0
   3  -7  -2   12.79    2.53   0
   3  -4   1  134.09    3.64   0
   3   6   3  466.12    3.62   0
   3   8   2    9.26    2.04   0
   3  10   1   52.47    2.72   0
   3  11   0   17.35    2.10   0
   3  12  -1   -3.18    2.14   0
   3  13  -2   -3.25    3.14   0
   4 -11  -8   44.19    2.44   0
   4 -10  -6   54.21    2.91   0
   4  -9  -4  214.37    2.85   0
   4   3   4  539.12    4.55   0
   4   4   4  240.39    3.67   0
   4   7   3  471.23    3.32   0
   4   9   2   13.84    1.87   0
   5 -11  -7   13.96    2.27   0
   5 -10  -5    2.47    1.97   0
   5  -8  -2   38.97    2.20   0
   5   5   4  360.53    3.18   0
   5   8   3   -0.97    2.02   0
   5  10   2    3.37    2.62   0
   5  11   1    0.68    2.00   0
   5  12   0   12.73    2.27   0
   6 -11  -7    1.47    2.16   0
   6 -10  -5   10.20    2.73   0
   6   0   4  182.16    3.66   0
   6   5   4   35.15    2.25   0
   6   6   4   66.75    3.09   0
   6   8   3   30.71    2.17   0
   6  10   2   18.36    2.24   0
   6  11   1   -0.70    2.09   0
   6  12   0    5.55    2.45   0
   7 -10  -5   13.79    2.65   0
   7  -8  -2   89.55    3.38   0
   7   1   4  292.48    3.57   0
   7   5   4   35.06    2.18   0
   7   8   3   -0.12    2.09   0
   7  10   2   11.84    3.16   0
   8  -7  -1   -0.43    2.60   0
   8  -6   0    4.92    2.68   0
   8   2   4    3.77    2.60   0
   8   3   4    8.71    2.88   0
   8   4   4   -0.46    2.49   0
   8   7   3    9.30    2.21   0
   9   0   3   52.34    2.99   0
   9   6   3   -0.72    2.44   0
  10  -1   2   -0.64    3.37   0
  -4  -1 -19    7.85    3.19   0
  -4  -1 -18    3.58    3.28   0
  -4  -1 -17    0.18    2.92   0
  -4  -1 -16   -0.70    2.50   0
  -4   1 -13    1.42    3.31   0
  -4   2 -12  140.74    4.60   0
  -4   3 -12    6.43    4.20   0
  -4   4 -12   51.95    5.35   0
  -3  -5 -19   10.78    2.33   0
  -3  -5 -18    7.57    2.28   0
  -3  -4 -14   16.31    2.72   0
  -3  -3 -11    6.02    1.91   0
  -3   1  -7  804.86    7.29   0
  -3   9 -10    0.39    3.24   0
  -3  10 -12   25.30    3.45   0
  -2  -7 -17   16.34    2.39   0
  -2  -7 -16   54.74    2.24   0
  -2  -6 -13   31.75    2.91   0
  -2  -6 -12   59.60    2.21   0
  -2  -5 -10  446.56    3.91   0
  -2  -4  -8   13.55    1.95   0
  -2   6  -4   22.08    2.26   0
  -2   8  -5   51.89    3.23   0
  -2   9  -6   30.24    3.07   0
  -2  10  -7   24.26    2.91   0
  -2  12 -11   -1.79    2.41   0
  -1  -8 -13    7.32    1.91   0
  -1  -7 -10   -0.44    1.77   0
  -1  -6  -8   89.61    2.82   0
  -1  -5  -6  912.28    4.43   0
  -1  -4  -5  500.34    3.89   0
  -1  -2  -3   -0.82    2.68   0
  -1   7  -2   55.17    2.34   0
  -1  12  -7   -3.40    2.13   0
  -1  13  -9    4.55    2.40   0
   0  -9 -12   48.56    2.22   0
   0  -8  -9    6.31    1.92   0
   0  -7  -7   96.00    2.82   0
   0  -6  -5  155.38    2.35   0
   0  -2  -1   48.51    2.31   0
   0  10  -2  122.11    3.05   0
   0  11  -3    9.40    2.93   0
   0  13  -6    1.78    2.40   0
   1 -10 -12   30.88    2.17   0
   1  -9  -9    6.70    2.37   0
   1  -5  -2  707.73    4.37   0
   1   3   2  711.18    5.21   0
   1   4   2 2244.84    7.65   0
   1   9   0   69.75    2.32   0
   1  13  -4   16.82    2.22   0
   2 -11 -13    1.20    1.98   0
   2 -11 -12   -1.97    2.23   0
   2 -10  -9   25.40    2.03   0
   2  -9  -7    4.33    2.70   0
   2  -8  -5   -3.41    2.55   0
   2  -6  -2   11.05    2.57   0
   2   3   3  176.76    3.30   0
   2   4   3  361.40    3.49   0
   2   9   1    4.67    1.94   0
   2  14  -4   -0.93    2.32   0
   3 -11 -10    6.08    2.19   0
   3  -6  -1   56.01    2.95   0
   3  -5   0  318.58    4.20   0
   3   7   3   14.04    2.03   0
   3   9   2   26.96    2.15   0
   3  14  -3    6.63    2.41   0
   4 -11  -9    5.05    2.07   0
   4   1   4  370.28    4.26   0
   4   5   4  496.03    3.46   0
   4   6   4   86.97    2.85   0
   4   8   3  333.12    3.09   0
   4  10   2   63.53    2.08   0
   4  11   1    3.11    2.11   0
   4  12   0    5.65    2.32   0
   4  13  -1    6.81    2.28   0
   5 -11  -8    2.41    2.11   0
   5 -10  -6    2.79    2.86   0
   5  -9  -4    3.37    2.43   0
   5  -7  -1   68.00    3.01   0
   5   0   4    1.70    2.83   0
   5   6   4    7.56    2.11   0
   5   7   4    2.08    2.70   0
   5   9   3   16.98    1.89   0
   6 -11  -8   22.10    3.14   0
   6  -8  -2   -1.08    1.92   0
   6  -4   2   40.69    5.24   0
   6   7   4   -2.35    1.85   0
   6   9   3   10.48    2.04   0
   7   0   4    2.17    2.67   0
   7   6   4   36.25    2.34   0
   7   7   4    2.46    2.73   0
   7   9   3   10.09    2.15   0
   8  -9  -4   19.80    2.94   0
   8  -2   3   23.39    3.57   0
   8   1   4   30.33    3.02   0
   8   5   4   12.19    2.01   0
   8   6   4    1.34    3.00   0
   8   8   3    9.98    2.19   0
  -4   0 -19    2.42    3.91   0
  -4   0 -17    2.46    3.50   0
  -4   0 -15    0.06    2.54   0
  -4   1 -14    3.71    3.57   0
  -4   2 -13    3.16    3.71   0
  -3  -4 -19    3.37    3.22   0
  -3  -4 -18   -2.41    3.21   0
  -3  -4 -16    7.09    2.17   0
  -3  -4 -15   74.17    2.46   0
  -3  -3 -12    1.15    1.90   0
  -3  -1  -9 1251.34    7.26   0
  -3   0  -8    4.01    3.08   0
  -3   6  -7    7.63    2.95   0
  -3  10 -11    6.96    3.07   0
  -2  -6 -15    2.08    2.90   0
  -2  -6 -14  133.11    2.44   0
  -2  -5 -11   23.91    2.71   0
  -2  -3  -7  258.81    2.98   0
  -2  -2  -6   36.47    2.52   0
  -2  -1  -5 2241.64    9.19   0
  -2   7  -4   76.75    3.22   0
  -2  11  -8   34.96    3.28   0
  -2  12 -10   -2.43    2.22   0
  -1  -8 -18    3.33    2.60   0
  -1  -8 -17    2.49    2.20   0
  -1  -8 -16   -3.96    2.09   0
  -1  -8 -15    0.85    1.84   0
  -1  -7 -11   23.49    1.96   0
  -1  -6  -9   43.22    2.61   0
  -1  -3  -4  447.34    3.90   0
  -1   3  -1  308.54    4.63   0
  -1   4  -1 1734.77    8.40   0
  -1   5  -1 1068.62    6.16   0
  -1   9  -3   42.88    2.19   0
  -1  10  -4   -1.11    2.23   0
  -1  11  -5  101.05    2.56   0
  -1  12  -6   -4.61    3.14   0
  -1  13  -8    6.40    2.26   0
   0  -9 -15    0.57    3.16   0
   0  -9 -14   58.50    2.09   0
   0  -9 -13    3.33    2.05   0
   0  -8 -10    3.24    1.88   0
   0  -5  -4 1312.38    5.31   0
   0  -4  -3 1035.99    5.38   0
   0  -3  -2 1137.00    6.40   0
   0   7   0    1.18    2.02   0
   0   9  -1   29.46    2.06   0
   0  12  -4   17.21    2.30   0
   0  13  -5    0.64    3.20   0
   0  14  -7    2.02    2.50   0
   1 -10 -15   -3.07    2.79   0
   1 -10 -14   15.09    2.10   0
   1 -10 -13   16.81    1.97   0
   1  -9 -10   14.31    2.00   0
   1  -8  -7   93.94    2.32   0
   1  -7  -5  862.01    4.49   0
   1   2   2 1348.21    7.40   0
   1   5   2   33.09    1.78   0
   1   8   1    7.27    1.92   0
   1  10   0   95.06    3.28   0
   1  11  -1    9.59    2.19   0
   1  12  -2   14.49    2.29   0
   1  13  -3    5.41    2.74   0
   1  14  -5    1.57    2.22   0
   2 -11 -14    3.60    2.08   0
   2 -10 -10   10.97    2.16   0
   2  -5  -1    2.96    1.81   0
   2  -4   0  184.45    3.21   0
   2   5   3   23.77    1.96   0
   2   6   3   67.35    2.68   0
   2   8   2  134.83    2.42   0
   2  10   1   37.42    2.20   0
   2  11   0    6.54    1.92   0
   2  12  -1   86.67    2.43   0
   2  13  -2    4.85    2.22   0
   2  14  -3   25.60    3.24   0
   3 -11 -12   -0.98    2.59   0
   3 -11 -11   -0.72    2.17   0
   3 -10  -8   16.68    2.15   0
   3  -9  -6    3.42    2.04   0
   3  -8  -4   43.38    2.21   0
   3   4   4  350.41    3.64   0
   3   8   3    2.90    1.92   0
   3  10   2   -1.51    2.77   0
   3  11   1    5.15    2.03   0
   3  12   0   37.05    2.39   0
   3  13  -1   -4.21    2.33   0
   3  14  -2   12.68    2.47   0
   4 -11 -10    2.33    2.12   0
   4 -10  -7   49.33    2.34   0
   4  -9  -5    9.41    2.46   0
   4  -8  -3  115.73    2.67   0
   4   7   4   76.62    2.96   0
   4   9   3   44.04    2.02   0
   4  11   2   58.01    2.85   0
   4  12   1   50.67    2.49   0
   4  13   0    3.58    2.31   0
   5 -11  -9   -1.02    2.04   0
   5  -6   0   67.15    2.90   0
   5  -5   1   69.81    3.26   0
   5   8   4    5.25    2.75   0
   5  10   3   10.11    2.79   0
   5  11   2    5.54    2.23   0
   5  12   1   11.29    2.23   0
   6 -10  -6   31.20    2.74   0
   6  -9  -4   90.15    2.68   0
   6  -7  -1   28.18    2.73   0
   6   4   5   47.13    2.84   0
   6   8   4    5.02    2.13   0
   6  10   3    8.58    2.11   0
   6  11   2    5.26    2.14   0
   7 -10  -6   -0.12    2.63   0
   7  -9  -4   13.76    2.80   0
   7  -7  -1   -0.10    2.55   0
   7   8   4   13.16    3.08   0
   7  10   3   -1.07    2.83   0
   8   0   4  114.56    3.49   0
   8   7   4    9.65    2.13   0
   9  -3   2    0.01    3.26   0
   9  -1   3    9.95    2.23   0
   9   2   4   -3.12    2.96   0
   9   3   4   44.02    2.48   0
   9   4   4   19.57    2.19   0
   9   5   4   21.35    2.30   0
  -4   1 -16   -1.71    4.06   0
  -4   3 -13   14.75    4.08   0
  -3  -3 -13    6.14    2.09   0
  -3  -2 -11   57.33    2.26   0
  -3   2  -7   44.70    3.69   0
  -3   8  -8  155.75    4.24   0
  -3   9  -9   -1.07    2.76   0
  -2  -6 -19    2.63    2.26   0
  -2  -6 -18    1.88    2.27   0
  -2  -6 -17   27.74    2.40   0
  -2  -6 -16    9.97    2.11   0
  -2  -5 -12  116.30    2.58   0
  -2  -4  -9   10.35    2.17   0
  -2   9  -5   19.15    2.92   0
  -2  10  -6    2.10    2.88   0
  -2  12  -9   26.31    3.26   0
  -1  -7 -13  105.27    2.36   0
  -1  -7 -12  285.16    2.97   0
  -1  -5  -7  472.20    3.37   0
  -1   6  -1    2.73    2.79   0
  -1   8  -2   19.97    2.11   0
  -1  13  -7   31.18    3.32   0
   0  -9 -17    5.94    2.11   0
   0  -9 -16    4.31    2.20   0
   0  -8 -12    8.45    2.51   0
   0  -8 -11    2.55    1.81   0
   0  -7  -8   82.10    2.31   0
   0  -6  -6  180.40    2.59   0
   0   4   1  926.04    5.39   0
   0   5   1 2542.08    8.07   0
   0   8   0    6.50    2.02   0
   0  11  -2  108.89    3.35   0
   0  12  -3    2.17    3.03   0
   0  14  -6    3.52    2.34   0
   1 -10 -16   11.17    2.15   0
   1  -9 -11    2.70    1.82   0
   1  -8  -8  151.73    2.45   0
   1  -7  -6   56.91    2.94   0
   1  -6  -4  241.13    2.74   0
   1   6   2   64.46    2.09   0
   1   7   2   59.46    2.75   0
   1   9   1  122.13    2.48   0
   1  14  -4    4.63    2.15   0
   2 -10 -12   18.34    2.32   0
   2 -10 -11   74.07    2.32   0
   2  -9  -8   20.38    1.89   0
   2  -8  -6  177.57    2.61   0
   2  -7  -4    2.53    2.08   0
   2   7   3   83.48    3.23   0
   2   9   2   95.61    2.31   0
   2  11   1    3.98    2.41   0
   2  12   0   23.48    2.94   0
   2  13  -1   14.70    3.07   0
   3 -11 -14    0.81    3.01   0
   3 -11 -13    4.62    2.00   0
   3 -10  -9    5.21    2.13   0
   3   5   4   42.54    2.14   0
   3   6   4   11.39    1.97   0
   3   9   3   17.32    2.07   0
   3  12   1   11.61    2.81   0
   3  13   0    1.13    3.19   0
   3  14  -1   10.59    2.81   0
   4 -11 -11    3.31    1.98   0
   4 -10  -8   24.98    2.52   0
   4  -7  -2   78.24    2.98   0
   4   0   4 1175.98    7.29   0
   4   8   4   10.34    2.04   0
   4  10   3   23.66    2.09   0
   5 -11 -10    3.62    2.13   0
   5 -10  -7    2.02    1.85   0
   5  -9  -5  124.87    3.17   0
   5  -8  -3    0.45    2.50   0
   5   3   5  151.08    2.59   0
   5   4   5   16.13    2.08   0
   5   5   5  153.42    2.53   0
   5   6   5    9.20    2.57   0
   5   9   4    9.12    2.80   0
   5  12   2   22.37    2.19   0
   6  -6   0  112.12    3.74   0
   6  -1   4   39.83    2.94   0
   6   2   5  165.08    3.30   0
   6   3   5   29.86    2.33   0
   6   5   5  105.39    2.47   0
   6   6   5   82.06    2.37   0
   6   9   4   51.62    2.23   0
   6  11   3    4.91    2.97   0
   7  -6   0   33.60    3.05   0
   7  -5   1   15.16    3.38   0
   7  -1   4  290.99    4.60   0
   7   3   5   22.30    2.03   0
   7   4   5   10.71    1.74   0
   7   5   5   34.39    2.35   0
   7   6   5    3.55    2.80   0
   7   9   4   -2.56    2.14   0
   8  -8  -3   34.14    3.10   0
   8   8   4    2.53    2.02   0
   9   1   4   15.24    2.98   0
  -4   1 -18    2.62    3.08   0
  -4   1 -17    3.36    2.74   0
  -4   2 -15   -4.26    4.48   0
  -4   2 -14   10.93    2.87   0
  -4   4 -13   14.13    4.25   0
  -4   5 -13   -0.63    4.80   0
  -3  -3 -20    4.95    2.27   0
  -3  -3 -19   42.83    2.76   0
  -3  -3 -17   16.86    2.22   0
  -3  -3 -16    5.67    2.22   0
  -3  -3 -15    0.75    1.95   0
  -3  -2 -12    5.45    1.98   0
  -3  -1 -10  151.93    2.97   0
  -3   7  -7   90.14    3.83   0
  -3  10 -10   26.43    3.39   0
  -3  11 -12    0.99    3.04   0
  -2  -5 -14   10.92    2.62   0
  -2  -5 -13    0.16    2.01   0
  -2  -3  -8   89.40    2.28   0
  -2   1  -4  565.40    7.80   0
  -2   4  -3  330.78    5.29   0
  -2   5  -3   41.96    3.05   0
  -2   8  -4   24.58    3.01   0
  -2  11  -7   38.53    2.48   0
  -1  -7 -19   -0.57    2.93   0
  -1  -7 -17   25.61    3.17   0
  -1  -7 -16    5.95    2.33   0
  -1  -7 -15    9.96    2.09   0
  -1  -7 -14   31.53    1.96   0
  -1  -6 -10  314.44    3.01   0
  -1  -5  -8  110.26    2.44   0
  -1  -4  -6  125.48    2.22   0
  -1   0  -2   10.28    2.57   0
  -1   2  -1 2717.17   17.09   0
  -1   7  -1    5.70    2.95   0
  -1   9  -2   11.35    2.77   0
  -1  10  -3    8.22    2.08   0
  -1  11  -4   16.93    2.08   0
  -1  12  -5    3.86    2.26   0
   0  -8 -14   86.15    3.11   0
   0  -8 -13   16.85    1.94   0
   0  -7  -9   14.71    1.92   0
   0  -6  -7    4.74    2.61   0
   0  -5  -5   90.72    2.06   0
   0   3   1  616.62    5.28   0
   0   6   1  431.53    3.42   0
   0   9   0   -3.07    2.69   0
   0  10  -1  211.38    2.85   0
   0  13  -4   16.51    2.34   0
   0  14  -5    0.78    3.07   0
   1  -9 -12   24.43    2.14   0
   1  -8  -9    9.74    2.00   0
   1  -5  -3   12.14    1.64   0
   1   8   2   20.87    2.87   0
   1  10   1   13.71    2.79   0
   1  11   0    3.48    2.18   0
   1  12  -1   35.11    2.28   0
   1  13  -2    7.54    2.06   0
   1  14  -3   -5.27    2.94   0
   2 -10 -14   -5.08    2.74   0
   2 -10 -13   57.59    2.42   0
   2  -9  -9    9.19    1.87   0
   2  -6  -3   53.25    2.78   0
   2   1   3   40.63    2.23   0
   2   8   3  407.70    3.24   0
   2  10   2   30.95    2.07   0
   2  14  -2   -2.44    2.25   0
   3 -10 -11   14.32    2.65   0
   3 -10 -10   15.83    2.10   0
   3  -9  -7  112.27    2.38   0
   3  -7  -3  113.24    2.39   0
   3  -1   3 1015.33    9.93   0
   3   7   4   64.37    2.26   0
   3  10   3    7.52    2.83   0
   3  11   2    5.47    2.12   0
   4 -11 -13   -0.62    2.81   0
   4 -11 -12   12.63    2.23   0
   4 -10  -9   26.14    2.93   0
   4  -9  -6   91.10    2.30   0
   4  -8  -4    9.94    2.12   0
   4   3   5  580.49    4.42   0
   4   4   5   70.05    2.24   0
   4   5   5  141.54    2.52   0
   4   6   5  585.74    4.10   0
   4   9   4  219.00    2.85   0
   4  11   3    8.37    2.99   0
   4  12   2   -6.14    2.23   0
   4  13   1   -2.08    2.20   0
   5 -11 -11    1.66    2.25   0
   5 -10  -8    1.89    2.63   0
   5  -1   4  137.08    3.73   0
   5   2   5   31.39    2.00   0
   5   7   5  165.92    2.53   0
   5  10   4    5.64    2.91   0
   5  11   3   54.10    2.27   0
   6 -10  -7    4.14    2.17   0
   6  -9  -5    2.10    2.93   0
   6  -8  -3  154.22    3.26   0
   6  -5   1    3.95    2.97   0
   6   1   5    8.72    2.67   0
   6   7   5   38.73    2.14   0
   6   8   5   41.45    2.97   0
   6  10   4    0.46    2.33   0
   7 -10  -7    1.84    2.34   0
   7  -9  -5    8.30    3.05   0
   7  -8  -3   -0.98    2.40   0
   7   8   5   14.70    2.61   0
   7  10   4   20.45    2.41   0
   8   2   5    1.72    2.70   0
   8   3   5  101.91    2.75   0
   8   4   5   -1.84    2.04   0
   8   5   5  100.18    2.84   0
   8   6   5    2.21    2.23   0
   8   7   5    7.81    2.66   0
  -4   2 -19    2.07    3.10   0
  -4   2 -18    0.15    3.27   0
  -4   2 -17   -1.02    3.36   0
  -4   2 -16    0.39    3.39   0
  -4   3 -15   -4.04    4.98   0
  -4   3 -14    2.26    3.85   0
  -4   6 -14   15.23    6.22   0
  -3  -2 -14   -2.79    2.63   0
  -3  -1 -11  141.05    3.49   0
  -3   0  -9   55.34    2.71   0
  -3   1  -8  117.41    3.81   0
  -2  -5 -20   13.43    2.49   0
  -2  -5 -19    7.65    2.08   0
  -2  -5 -18   99.53    2.75   0
  -2  -5 -17   28.54    2.00   0
  -2  -5 -16   12.39    2.17   0
  -2  -3  -9   72.92    2.97   0
  -2  -2  -7   54.86    2.09   0
  -2   6  -3   58.21    3.18   0
  -2  10  -5    1.31    2.84   0
  -2  11  -6   35.08    3.06   0
  -2  12  -8    1.90    2.42   0
  -1  -6 -12   65.07    2.35   0
  -1  -5  -9   39.89    2.63   0
  -1  -3  -5  301.60    3.27   0
  -1   8  -1    7.61    2.87   0
  -1  11  -3   52.73    3.05   0
  -1  13  -6    4.28    2.46   0
   0  -8 -18    5.95    2.57   0
   0  -8 -17    0.47    2.18   0
   0  -8 -16    1.29    2.06   0
   0  -8 -15   -2.57    2.08   0
   0  -7 -10   24.11    1.84   0
   0  -4  -4  374.59    3.82   0
   0   7   1 1157.08    5.11   0
   0  11  -1   14.45    2.18   0
   0  12  -2    3.18    2.31   0
   0  13  -3    0.32    2.81   0
   1  -9 -17   18.21    3.01   0
   1  -9 -16    2.31    2.59   0
   1  -9 -15   84.31    2.53   0
   1  -9 -14   10.47    1.90   0
   1  -8 -10   12.45    1.73   0
   1  -7  -7  175.15    2.63   0
   1  -6  -5   19.20    1.88   0
   1  -4  -2  546.10    4.76   0
   1   1   2 5675.53   18.09   0
   1   9   2   10.23    2.65   0
   1  12   0    5.86    2.72   0
   1  13  -1    6.75    2.52   0
   2 -10 -16   -4.80    2.12   0
   2 -10 -15    2.80    1.97   0
   2  -9 -11   35.43    2.56   0
   2  -9 -10   98.30    2.35   0
   2  -8  -7   15.72    1.98   0
   2  -7  -5  305.51    3.03   0
   2   5   4    9.05    2.47   0
   2   9   3   24.50    2.10   0
   2  11   2   10.59    2.65   0
   2  12   1   42.58    2.30   0
   2  13   0    1.18    2.19   0
   2  14  -1    0.76    2.24   0
   3 -10 -12   13.78    2.02   0
   3  -9  -8    7.23    1.95   0
   3  -6  -2   13.84    2.77   0
   3   1   4  868.20    5.52   0
   3   8   4   97.73    2.22   0
   3   9   4   10.73    2.57   0
   3  12   2   72.66    2.20   0
   3  13   1   17.24    2.34   0
   3  14   0   43.49    2.73   0
   4 -10 -10    2.86    2.37   0
   4  -9  -7   10.65    2.55   0
   4  -6  -1  585.39    4.56   0
   4   2   5  174.12    3.32   0
   4   7   5  134.33    2.48   0
   4  10   4    6.96    1.98   0
   4  13   2   12.03    3.09   0
   5 -10  -9   32.20    3.14   0
   5  -9  -6    8.95    2.92   0
   5  -7  -2   36.41    2.88   0
   5   1   5  114.12    3.13   0
   5   8   5   68.11    2.19   0
   5  11   4    9.21    2.72   0
   5  12   3   17.66    2.32   0
   6 -10  -8    2.41    2.54   0
   6   9   5    1.76    1.99   0
   6  11   4   -0.28    2.22   0
   7   1   5   36.49    2.38   0
   7   9   5   18.70    2.94   0
   8  -7  -2   10.28    3.10   0
   8  -1   4   27.02    3.03   0
   8   8   5    9.72    2.33   0
   9  -6  -1    1.04    3.08   0
   9   0   4   -2.35    2.88   0
   9   3   5    1.69    2.95   0
   9   4   5   17.80    2.29   0
   9   5   5    4.90    2.35   0
  -4   3 -19    0.55    3.67   0
  -4   3 -18    0.37    3.93   0
  -4   3 -16    0.17    4.01   0
  -4   4 -15   -0.82    6.02   0
  -4   4 -14   38.84    5.21   0
  -4   5 -14    6.32    5.64   0
  -4   7 -16    8.98    6.57   0
  -3  -2 -20   -1.41    2.50   0
  -3  -2 -19    0.33    2.27   0
  -3  -2 -17   11.76    2.27   0
  -3  -1 -12   -3.13    2.75   0
  -3   8  -7   31.21    3.54   0
  -3   9  -8   -1.66    3.04   0
  -3  10  -9    9.00    3.44   0
  -3  11 -11    3.15    2.38   0
  -2  -4 -13   16.03    2.19   0
  -2  -4 -12   21.86    2.05   0
  -2  -1  -6   21.35    1.92   0
  -2   0  -5   18.47    2.64   0
  -2   7  -3   66.85    2.90   0
  -2   9  -4  254.80    3.33   0
  -2  12  -7   -0.72    3.36   0
  -2  13  -9    3.47    2.64   0
  -1  -6 -20    3.10    3.28   0
  -1  -6 -15    1.39    2.64   0
  -1  -6 -14   16.54    2.01   0
  -1  -6 -13   26.77    2.32   0
  -1  -5 -10  228.82    3.32   0
  -1  -4  -7    2.30    1.73   0
  -1  -2  -4   97.75    2.55   0
  -1  -1  -3    7.18    2.68   0
  -1  10  -2   27.31    2.28   0
  -1  13  -5    8.72    2.36   0
   0  -7 -12   -1.13    1.83   0
   0  -7 -11    2.43    2.10   0
   0  -6  -8  332.26    3.15   0
   0  -5  -6 2843.60    7.74   0
   0   2   1   50.99    2.34   0
   0   8   1  134.48    2.50   0
   0  10   0   85.05    2.48   0
   0  14  -4    1.63    2.37   0
   1  -8 -12  304.35    3.50   0
   1  -8 -11    4.75    1.91   0
   1  -7  -8  414.99    3.75   0
   1  -3  -1   14.86    2.99   0
   1   4   3  452.11    3.63   0
   1   5   3 1236.10    5.09   0
   1   6   3  472.43    3.32   0
   1   7   3  826.20    4.71   0
   1  11   1   22.14    2.21   0
   1  14  -2    3.21    2.15   0
   2  -9 -12   16.62    2.13   0
   2  -8  -8    7.53    1.92   0
   2  -5  -2  178.58    2.72   0
   2   3   4 1206.70    5.91   0
   2   4   4  146.35    2.37   0
   2   6   4   31.51    1.93   0
   2   7   4   91.05    2.45   0
   2  10   3    1.28    2.15   0
   2  13   1   30.07    2.88   0
   2  14   0   -0.90    2.75   0
   3 -10 -15   -0.72    2.99   0
   3 -10 -14   17.87    2.26   0
   3 -10 -13   19.61    2.25   0
   3  -9  -9   67.12    2.17   0
   3  -8  -6   42.55    2.15   0
   3  -7  -4  424.04    3.48   0
   3   4   5  369.88    3.69   0
   3   7   5  557.08    3.92   0
   3  10   4   95.47    3.01   0
   3  11   3  102.02    2.57   0
   3  13   2    1.77    2.70   0
   3  14   1    3.04    3.37   0
   4 -10 -11   10.89    2.23   0
   4  -8  -5   52.40    2.90   0
   4  -7  -3    0.66    2.56   0
   4  -5   0   57.41    3.22   0
   4   8   5    1.22    1.96   0
   4   9   5   -2.65    2.74   0
   4  11   4   23.64    2.68   0
   4  12   3   -1.40    2.19   0
   5 -10 -10   51.34    3.16   0
   5  -8  -4    6.92    1.92   0
   5   4   6    3.09    2.55   0
   5   5   6   72.42    3.14   0
   5  10   5    3.44    2.71   0
   6 -10  -9   12.49    2.87   0
   6  -9  -6   61.46    2.70   0
   6  -7  -2   74.49    3.18   0
   6   3   6    6.59    2.52   0
   6   4   6   12.77    2.04   0
   6   5   6  135.54    2.61   0
   6   6   6    4.08    1.88   0
   6   7   6  130.13    2.68   0
   6  10   5   -0.77    2.24   0
   7  -9  -6    1.00    2.83   0
   7  -7  -2   -2.43    2.89   0
   7   3   6  116.46    2.97   0
   7   4   6   20.10    2.13   0
   7   5   6   22.51    2.22   0
   7   6   6   -2.41    2.18   0
   7   7   6   54.94    3.24   0
   8  -8  -4   19.61    2.92   0
   8   1   5   27.95    2.30   0
   8   5   6   16.54    2.80   0
   8   6   6   -2.28    2.76   0
   9  -2   3   22.76    3.44   0
   9   2   5   21.84    2.96   0
  -4   4 -18   -0.53    4.30   0
  -4   4 -17   -0.22    4.48   0
  -4   4 -16   -1.13    4.42   0
  -4   5 -17    0.26    5.74   0
  -4   5 -15   -0.04    5.47   0
  -4   6 -15    7.53    6.90   0
  -3   0 -10   -1.31    2.18   0
  -3   6  -6    5.85    3.37   0
  -3  11 -10    0.95    3.49   0
  -2  -4 -20   23.08    2.30   0
  -2  -4 -19   -1.72    2.34   0
  -2  -4 -18   15.08    2.12   0
  -2  -4 -17   -2.25    2.10   0
  -2  -4 -16   27.54    2.09   0
  -2  -4 -15    7.38    1.93   0
  -2  -4 -14  155.89    2.61   0
  -2  -2  -8   17.46    1.82   0
  -2   3  -3  146.20    5.23   0
  -2   8  -3  371.57    3.93   0
  -2  10  -4   24.94    3.00   0
  -2  11  -5    1.10    3.10   0
  -2  12  -6   -3.59    2.79   0
  -2  13  -8   13.15    2.62   0
  -1  -6 -19   -2.45    2.22   0
  -1  -6 -18   -1.42    2.30   0
  -1  -6 -17   11.59    1.95   0
  -1  -6 -16   22.89    2.23   0
  -1  -5 -11  471.05    3.52   0
  -1  -4  -8   19.39    2.29   0
  -1  -3  -6 2612.23    8.18   0
  -1   5   0  204.09    3.35   0
  -1   6   0  308.78    3.43   0
  -1   7   0  222.12    3.55   0
  -1   9  -1  128.82    2.60   0
  -1  11  -2    5.52    2.95   0
  -1  12  -3   33.27    2.43   0
  -1  13  -4   34.49    3.37   0
  -1  14  -6    4.41    2.62   0
   0  -7 -19   -4.21    2.96   0
   0  -7 -15   67.03    3.19   0
   0  -7 -14  127.11    2.43   0
   0  -7 -13    3.36    2.03   0
   0  -6  -9  234.03    2.76   0
   0  -3  -3    1.33    1.78   0
   0   5   2  989.82    5.25   0
   0   6   2    9.04    2.87   0
   0   9   1   26.46    2.11   0
   0  11   0    0.47    2.05   0
   0  12  -1   80.85    2.53   0
   0  13  -2   -0.95    2.10   0
   0  14  -3   22.85    2.39   0
   1  -8 -14   49.45    3.03   0
   1  -8 -13   27.82    1.91   0
   1  -6  -6  160.25    2.57   0
   1  -2   0 5652.07   20.75   0
   1   3   3  541.68    4.28   0
   1   8   3   63.43    2.23   0
   1  10   2   16.91    2.29   0
   1  12   1    0.35    2.29   0
   1  13   0    1.43    2.08   0
   1  14  -1   19.83    2.25   0
   2  -9 -16   14.54    3.03   0
   2  -9 -15    0.69    2.64   0
   2  -9 -14    8.96    1.90   0
   2  -9 -13    2.73    2.03   0
   2  -8  -9   26.06    2.09   0
   2  -7  -6  135.86    2.45   0
   2  -6  -4   20.97    1.97   0
   2   8   4   31.85    2.09   0
   2   9   4  289.44    3.47   0
   2  11   3    0.52    2.56   0
   2  12   2   -2.93    2.10   0
   3  -9 -10   31.37    1.93   0
   3  -8  -7   -0.76    2.62   0
   3  -5  -1  296.55    3.79   0
   3   3   5 1071.23    5.04   0
   3   8   5   25.85    2.00   0
   3  11   4   -1.31    2.78   0
   3  12   3   20.93    1.97   0
   4 -10 -13   27.63    2.73   0
   4 -10 -12   21.21    2.22   0
   4  -9  -8   13.57    1.85   0
   4   1   5  835.07    5.62   0
   4   6   6   46.71    2.83   0
   4  12   4    5.29    3.12   0
   4  13   3   -4.51    2.31   0
   5 -10 -11    0.39    2.59   0
   5  -9  -7   81.81    2.59   0
   5  -6  -1   -0.61    2.68   0
   5   3   6  738.79    4.47   0
   5   7   6   15.84    2.01   0
   5   8   6    6.45    2.00   0
   5  11   5   30.05    3.30   0
   5  12   4    5.21    2.28   0
   6 -10 -10    1.98    2.60   0
   6  -8  -4   14.33    2.22   0
   6   0   5   14.71    2.78   0
   6   8   6    1.06    2.04   0
   6   9   6   11.44    3.13   0
   6  11   5    0.25    2.33   0
   7  -8  -4   54.43    2.45   0
   7   0   5  128.57    3.45   0
   7   8   6    0.29    2.11   0
   7   9   6   10.84    3.01   0
   8   3   6    9.60    2.73   0
   8   4   6   -1.22    2.16   0
   8   7   6   22.77    2.34   0
   9  -5   0   12.89    3.97   0
  -4   6 -17    0.22    5.20   0
  -4   6 -16   -1.23    5.48   0
  -3  -1 -19   18.90    2.51   0
  -3  -1 -17    0.56    2.18   0
  -3  -1 -15   12.46    2.07   0
  -3   0 -11 2837.78   10.68   0
  -3   1  -9 1096.00    8.06   0
  -3   2  -8   20.31    3.28   0
  -3   3  -7  130.53    5.64   0
  -3   5  -6    0.87    4.01   0
  -3   7  -6   99.27    4.05   0
  -3   9  -7  123.95    4.15   0
  -3  10  -8   29.72    3.59   0
  -3  11  -9   22.28    3.41   0
  -2  -3 -21    0.16    3.09   0
  -2  -3 -12   69.15    2.54   0
  -2  -2  -9    7.51    2.75   0
  -2  -1  -7   69.75    2.92   0
  -2   9  -3   25.70    3.01   0
  -2  13  -7   18.55    3.33   0
  -1  -5 -20    4.77    3.24   0
  -1  -5 -13  126.53    3.29   0
  -1  -5 -12    2.24    1.90   0
  -1  -4  -9  137.63    3.20   0
  -1   4   0 1255.83    6.97   0
  -1   8   0  165.95    2.75   0
  -1  10  -1    9.54    2.28   0
  -1  14  -5    8.80    2.37   0
   0  -7 -18    2.25    2.30   0
   0  -7 -17   20.53    2.12   0
   0  -6 -11   17.47    2.70   0
   0  -6 -10   21.63    2.03   0
   0  -5  -7  577.28    3.75   0
   0  -4  -5  390.95    3.31   0
   0   4   2 1669.60    6.91   0
   0   7   2  726.00    4.09   0
   0   8   2  141.33    3.33   0
   0  10   1  197.48    2.90   0
   0  12   0  165.29    3.58   0
   1  -8 -19    1.65    2.36   0
   1  -8 -18   -2.76    2.20   0
   1  -8 -16    2.49    2.00   0
   1  -8 -15    6.13    2.07   0
   1  -7 -10   16.64    1.91   0
   1   9   3   42.52    2.23   0
   1  11   2   -1.29    2.18   0
   1  14   0   30.10    2.86   0
   2  -9 -17    5.48    2.18   0
   2  -8 -10    1.67    1.91   0
   2  -7  -7   22.08    2.66   0
   2  -4  -1    9.73    1.86   0
   2   2   4  515.57    4.32   0
   2  10   4   29.97    2.75   0
   2  12   3    9.08    2.67   0
   2  14   1   15.37    2.27   0
   3  -9 -12    1.23    1.98   0
   3  -9 -11   -5.01    2.15   0
   3  -8  -8  167.63    3.18   0
   3  -7  -5  550.66    3.69   0
   3  -6  -3  521.76    4.48   0
   3   9   5  113.79    2.55   0
   3  10   5   20.94    2.43   0
   3  13   3   10.87    2.36   0
   3  14   2   -4.57    2.43   0
   4 -10 -14    3.46    2.18   0
   4  -9  -9    9.03    2.09   0
   4  -8  -6   16.45    2.18   0
   4  -6  -2   50.27    2.83   0
   4  -4   1  244.36    4.68   0
   4   4   6   63.67    2.17   0
   4   7   6  420.33    3.36   0
   4   8   6   15.92    2.01   0
   4  11   5   16.03    2.19   0
   5 -10 -13    3.82    2.89   0
   5 -10 -12   31.42    2.28   0
   5  -9  -8   28.01    2.19   0
   5  -8  -5    0.84    2.02   0
   5  -7  -3  115.03    3.24   0
   5   0   5  106.55    3.40   0
   5   2   6   16.43    2.72   0
   5   9   6   16.34    2.16   0
   5  10   6   23.60    2.82   0
   5  12   5    4.31    2.98   0
   6 -10 -11   17.13    2.43   0
   6  -9  -7    6.21    1.98   0
   6   2   6    6.54    2.15   0
   6  10   6    4.56    2.10   0
   7  -9  -7    9.34    2.22   0
   7   2   6   59.07    2.38   0
   8  -6  -1   13.51    2.95   0
   8   0   5   -0.44    2.97   0
   8   2   6   13.16    2.61   0
   9  -1   4   13.30    3.49   0
   9   1   5   -0.08    2.16   0
   9   4   6   -0.29    2.25   0
  -3   0 -20   -3.64    2.49   0
  -3   0 -19    1.14    3.34   0
  -3   0 -13    3.78    2.89   0
  -3   0 -12   -0.51    2.10   0
  -3   8  -6   24.95    3.63   0
  -3  12 -10   14.10    3.25   0
  -2  -3 -20   35.08    2.46   0
  -2  -3 -19    1.34    2.31   0
  -2  -3 -18   44.27    2.23   0
  -2  -3 -17   17.81    2.90   0
  -2  -3 -16    8.88    2.65   0
  -2  -3 -15   -4.85    2.41   0
  -2  -3 -14   52.28    2.18   0
  -2   6  -2  190.92    3.85   0
  -2   7  -2  353.30    4.73   0
  -2  10  -3    2.13    3.19   0
  -2  11  -4    3.10    2.07   0
  -2  12  -5   13.28    2.20   0
  -2  13  -6    9.79    3.12   0
  -1  -5 -19    0.64    2.38   0
  -1  -5 -18    0.95    2.07   0
  -1  -5 -17   18.39    2.18   0
  -1  -5 -15    9.53    2.00   0
  -1  -4 -10    4.64    2.86   0
  -1  -3  -7 1723.99    6.55   0
  -1  -2  -5  399.13    4.28   0
  -1   9   0   68.15    2.43   0
  -1  11  -1   15.94    2.25   0
  -1  12  -2   22.78    2.50   0
  -1  13  -3   27.22    2.32   0
  -1  14  -4    5.86    3.30   0
   0  -6 -13    2.90    2.51   0
   0  -6 -12    3.45    1.90   0
   0  -5  -8   41.28    2.27   0
   0   9   2   -0.49    2.06   0
   0  11   1   15.61    2.16   0
   1  -7 -12   17.65    2.62   0
   1  -7 -11   30.66    2.09   0
   1  -6  -7  138.55    2.61   0
   1  -5  -5  111.43    2.74   0
   1  -4  -3  770.22    4.85   0
   1   2   3    0.29    2.68   0
   1   5   4   72.03    2.78   0
   1   6   4   26.09    1.90   0
   1   7   4  217.52    2.84   0
   1   8   4    3.30    2.61   0
   1  10   3    4.83    2.02   0
   1  12   2   24.49    2.36   0
   1  13   1   20.11    2.15   0
   2  -8 -12   11.21    1.92   0
   2  -8 -11   46.72    2.04   0
   2  -7  -8   66.80    2.87   0
   2  -6  -5  564.26    4.26   0
   2  -5  -3 1040.84    5.53   0
   2   5   5  674.17    3.94   0
   2   7   5   11.34    2.06   0
   2   8   5   59.95    2.25   0
   2  11   4    4.82    2.00   0
   2  14   2   15.80    3.11   0
   3  -9 -17    1.36    3.15   0
   3  -9 -15   20.72    2.83   0
   3  -9 -14    5.59    2.17   0
   3  -9 -13    1.07    1.85   0
   3  -8  -9   83.66    3.03   0
   3  -4   0 1003.32    6.82   0
   3   0   4   -5.16    2.43   0
   3   2   5 2381.02    7.87   0
   3   5   6    7.25    2.91   0
   3   6   6   10.88    1.95   0
   3   7   6  136.53    2.46   0
   3   8   6   32.91    2.84   0
   3  11   5   22.44    2.98   0
   3  12   4   -0.65    2.05   0
   4  -9 -11    6.56    2.87   0
   4  -9 -10   23.43    2.21   0
   4  -8  -7   14.63    2.91   0
   4  -7  -4    1.20    2.07   0
   4  -1   4  350.45    5.39   0
   4   3   6   20.80    2.23   0
   4   9   6  108.23    2.35   0
   4  10   6   10.92    2.21   0
   4  12   5   11.21    2.18   0
   4  13   4   23.30    2.20   0
   5  -9  -9   10.53    2.07   0
   5  -8  -6    9.68    2.75   0
   5   5   7   41.80    2.92   0
   5   6   7    5.35    1.95   0
   5   7   7   67.88    2.21   0
   5   8   7   63.01    3.04   0
   5  11   6    4.03    2.34   0
   6  -9  -8    1.03    2.00   0
   6  -8  -5   55.98    2.42   0
   6  -7  -3   36.10    2.94   0
   6  -6  -1   35.57    2.36   0
   6   4   7    8.07    2.76   0
   6   5   7    8.75    1.83   0
   6   6   7   40.05    2.20   0
   6   7   7   32.00    2.28   0
   6   8   7    8.94    2.04   0
   6   9   7   12.11    2.90   0
   7  -9  -8    2.31    2.86   0
   7  -8  -5   -0.59    2.46   0
   7  -6  -1    9.09    2.82   0
   7   4   7    2.81    2.94   0
   7   5   7   26.89    2.19   0
   7   7   7    8.12    2.08   0
   7   8   7    0.86    2.07   0
   7   9   7   32.95    3.10   0
   8  -8  -5    0.30    2.06   0
   8  -7  -3    7.43    3.04   0
   8   5   7   69.42    3.28   0
   8   6   7   34.79    3.10   0
   8   7   7    2.06    3.25   0
   9   3   6   49.97    2.61   0
  -3   0 -18   -1.93    2.23   0
  -3   0 -16   -2.58    2.16   0
  -3   0 -14   -0.69    1.90   0
  -3   1 -10  141.97    3.28   0
  -3   9  -6    2.08    2.77   0
  -3  10  -7   26.04    2.56   0
  -3  11  -8    4.93    3.34   0
  -2  -2 -21    7.88    2.93   0
  -2  -2 -11  553.05    4.49   0
  -2  -2 -10  398.98    3.84   0
  -2  -1  -8  110.40    3.38   0
  -2   0  -6  322.05    4.44   0
  -2   5  -2  169.40    3.25   0
  -2   8  -2  121.57    2.65   0
  -2   9  -2   93.87    3.09   0
  -2  12  -4   12.43    2.90   0
  -1  -4 -21   41.54    2.88   0
  -1  -4 -11  634.07    3.93   0
  -1   3   0 5331.66   16.72   0
  -1   7   1   46.29    3.08   0
  -1  10   0   98.80    2.71   0
  -1  12  -1    7.15    3.20   0
  -1  13  -2   -1.37    3.01   0
  -1  14  -3    9.16    2.97   0
   0  -6 -20   17.22    2.30   0
   0  -6 -19    3.51    2.20   0
   0  -6 -18    5.17    2.27   0
   0  -6 -17    2.34    2.15   0
   0  -6 -16   22.88    2.35   0
   0  -6 -15   11.36    1.90   0
   0  -6 -14   10.04    1.93   0
   0  -5  -9   48.09    2.30   0
   0  -4  -6   75.17    1.98   0
   0  -3  -4 1081.66    6.05   0
   0  -1  -1  177.57    4.23   0
   0   3   2 1110.90    6.49   0
   0  10   2  127.74    2.63   0
   0  12   1   79.41    2.60   0
   0  13   0   -1.82    2.04   0
   0  14  -1    4.35    2.36   0
   1  -7 -19   17.99    2.26   0
   1  -7 -18   -2.55    3.05   0
   1  -7 -17  176.95    3.40   0
   1  -7 -16   -3.78    2.73   0
   1  -7 -15   17.59    2.93   0
   1  -7 -14   19.97    2.05   0
   1  -7 -13   83.67    2.14   0
   1  -6  -8  169.10    2.70   0
   1   4   4  139.87    3.01   0
   1   9   4  254.54    2.82   0
   1  11   3   60.67    2.23   0
   1  13   2    2.89    2.07   0
   1  14   1   25.40    2.29   0
   2  -8 -18    1.18    2.26   0
   2  -8 -17    6.41    2.21   0
   2  -8 -16    1.59    2.17   0
   2  -8 -15   22.21    2.13   0
   2  -8 -14    2.31    2.07   0
   2  -8 -13  127.22    2.42   0
   2  -7  -9  158.66    3.17   0
   2  -3   0  168.78    3.97   0
   2   4   5 2404.68    7.16   0
   2   9   5   21.90    2.11   0
   2  10   5    1.33    2.62   0
   2  13   3   -2.91    2.19   0
   3  -8 -10   50.50    2.55   0
   3  -7  -6  194.61    2.69   0
   3   4   6    1.65    2.01   0
   3  10   6   -4.02    2.45   0
   3  12   5   -4.69    3.14   0
   3  13   4    9.68    2.23   0
   4  -9 -13   -3.52    2.67   0
   4  -9 -12   20.12    1.97   0
   4  -8  -8   52.86    2.75   0
   4  -3   2  433.36    8.60   0
   4   2   6   67.45    3.23   0
   4   6   7    1.18    2.77   0
   4   7   7    4.67    2.08   0
   4   8   7    8.82    2.91   0
   4  11   6   89.19    2.35   0
   4  13   5   10.05    2.36   0
   5  -9 -10    1.72    1.88   0
   5  -5   0  109.79    3.37   0
   5   4   7    4.92    1.97   0
   5   9   7  213.94    3.04   0
   5  10   7   26.40    2.81   0
   5  12   6   -4.14    2.46   0
   6  -9  -9    0.47    2.17   0
   6  -8  -6    8.60    2.98   0
   6   1   6   32.98    2.34   0
   6  10   7    6.19    2.11   0
   7  -9  -9   20.82    3.02   0
   7  -7  -3    3.57    2.05   0
   7  -2   4    2.03    3.21   0
   7   1   6   17.03    2.11   0
   7   3   7  119.77    3.43   0
   8   1   6   15.30    2.74   0
   8   4   7    0.37    2.14   0
   9   0   5    2.30    2.62   0
   9   2   6    4.64    2.98   0
  -3   1 -20    3.45    2.57   0
  -3   1 -19   11.88    3.05   0
  -3   1 -11  113.40    3.08   0
  -3   2  -9   68.18    3.85   0
  -3  11  -7    2.79    2.86   0
  -3  12  -9   -2.30    2.74   0
  -2  -2 -20    1.01    2.43   0
  -2  -2 -19   26.21    2.41   0
  -2  10  -2   29.06    3.11   0
  -2  11  -3    3.76    2.11   0
  -2  13  -5   -3.31    2.48   0
  -1  -4 -20    5.44    2.35   0
  -1  -4 -19   36.63    2.42   0
  -1  -4 -18   16.13    2.77   0
  -1  -4 -17   34.75    3.08   0
  -1  -4 -16    2.68    2.66   0
  -1  -4 -13  400.36    3.38   0
  -1  -4 -12   13.82    2.13   0
  -1  -3  -8   33.86    1.99   0
  -1   5   1 2404.30    8.52   0
  -1   8   1  234.49    3.01   0
  -1   9   1   17.78    2.29   0
  -1  11   0   -2.20    2.30   0
   0  -5 -21    9.86    3.29   0
   0  -5 -10  302.77    3.02   0
   0   6   3 1499.71    5.77   0
   0   7   3  256.20    2.87   0
   0   8   3  514.09    3.71   0
   0   9   3    9.65    2.15   0
   0  11   2  107.76    2.71   0
   0  13   1   35.12    3.03   0
   0  14   0   23.69    2.44   0
   1  -6  -9   98.75    2.32   0
   1  -5  -6  208.07    2.61   0
   1  10   4    5.27    2.17   0
   1  11   4   10.31    2.58   0
   1  12   3   34.28    2.38   0
   1  14   2   -2.40    2.66   0
   2  -7 -10    4.82    2.46   0
   2  -6  -6    1.19    1.99   0
   2   1   4  601.76    5.41   0
   2   3   5 2540.35    7.66   0
   2   7   6  936.20    4.69   0
   2  11   5   11.38    2.20   0
   2  13   4   29.37    3.11   0
   2  14   3   24.13    2.39   0
   3  -8 -12   17.20    2.51   0
   3  -8 -11   70.25    2.19   0
   3  -7  -7   -0.61    2.05   0
   3  -6  -4   69.72    2.53   0
   3  -5  -2   13.02    2.47   0
   3  11   6   14.36    2.97   0
   3  13   5   -6.80    3.05   0
   4  -9 -16   19.92    2.11   0
   4  -9 -15    0.73    2.14   0
   4  -9 -14   56.85    2.59   0
   4  -8  -9   11.68    2.72   0
   4  -7  -5   48.84    2.09   0
   4  -6  -3   10.61    2.78   0
   4  -5  -1   16.27    3.11   0
   4   4   7    4.33    2.78   0
   4   5   7  361.37    3.27   0
   4   9   7    7.51    1.98   0
   4  12   6    2.87    2.12   0
   5  -9 -12   27.42    2.22   0
   5  -9 -11   23.87    2.14   0
   5  -8  -7    7.42    1.93   0
   5  -7  -4    1.24    2.20   0
   5  -6  -2   44.17    2.76   0
   5   1   6    1.75    1.91   0
   5   3   7   86.93    2.43   0
   5  11   7   23.62    2.24   0
   6  -9 -11    1.80    2.92   0
   6  -9 -10   -1.02    2.28   0
   6  -2   4   50.83    4.07   0
   6   6   8   19.67    3.04   0
   6   7   8   16.07    2.95   0
   6   8   8   36.14    3.14   0
   7  -9 -10    6.33    2.70   0
   7  -8  -6   16.03    2.05   0
   7   6   8    2.27    2.98   0
   7   7   8    8.03    3.03   0
   7   8   8   18.14    3.03   0
   8  -8  -6   -0.17    2.22   0
   8   3   7  100.32    2.91   0
   9  -6  -2    7.12    2.79   0
  -3   1 -17   -0.59    2.43   0
  -3   1 -15   10.54    2.79   0
  -3   1 -12   -1.12    2.11   0
  -3   2 -20    0.14    3.47   0
  -3   7  -5  436.76    6.04   0
  -3   8  -5   21.89    3.29   0
  -3  10  -6    1.14    2.24   0
  -3  12  -8    2.41    2.63   0
  -2  -2 -16  104.82    2.52   0
  -2  -2 -15    3.47    1.93   0
  -2  -2 -14   66.32    2.47   0
  -2  -1 -21    6.95    2.27   0
  -2   4  -2   82.55    3.43   0
  -2   7  -1  819.79    6.11   0
  -2   8  -1    5.54    2.96   0
  -2  11  -2   15.13    3.07   0
  -2  12  -3   13.92    2.39   0
  -2  13  -4   28.50    2.58   0
  -2  14  -5   -0.91    3.32   0
  -1  -3 -21    4.36    3.16   0
  -1  -3  -9    1.17    1.80   0
  -1  -2  -6    6.91    1.84   0
  -1  -1  -4 1791.73    8.96   0
  -1  10   1   59.72    2.42   0
  -1  12   0    3.82    2.35   0
  -1  13  -1   17.73    2.22   0
  -1  14  -2    0.64    2.31   0
   0  -5 -20   12.31    2.19   0
   0  -5 -19   11.24    2.24   0
   0  -5 -18   45.38    2.83   0
   0  -5 -13    7.90    2.77   0
   0  -5 -12  170.04    2.59   0
   0  -5 -11   30.66    2.05   0
   0   1   1  174.60    4.47   0
   0   4   3 1122.86    5.85   0
   0  10   3  200.18    2.91   0
   0  12   2   10.52    2.26   0
   1  -6 -20    1.03    2.72   0
   1  -6 -11    2.01    1.92   0
   1  -6 -10   82.99    2.24   0
   1  -4  -4  539.11    4.00   0
   1  -3  -2  415.24    4.47   0
   1   3   4  491.81    4.03   0
   1   6   5    3.34    1.85   0
   1   7   5 1483.92    5.51   0
   1   8   5  554.49    3.66   0
   1   9   5  235.46    3.52   0
   1  12   4    1.29    2.95   0
   1  13   3   20.84    2.37   0
   2  -7 -12   85.18    2.92   0
   2  -7 -11    2.32    2.01   0
   2  -6  -7   59.94    3.09   0
   2  -5  -4   98.41    2.50   0
   2  -4  -2 1762.65    7.59   0
   2   5   6  723.96    4.09   0
   2   6   6    9.32    2.30   0
   2   8   6  425.39    3.24   0
   2   9   6   29.51    2.16   0
   2  10   6    6.73    2.92   0
   2  12   5    9.14    2.06   0
   2  14   4   -4.69    3.08   0
   3  -8 -18   -1.01    2.19   0
   3  -8 -17   10.03    2.13   0
   3  -8 -16   -0.60    2.19   0
   3  -8 -15    0.52    1.92   0
   3  -8 -14   14.12    2.12   0
   3  -8 -13    5.27    2.16   0
   3  -7  -8   23.62    2.71   0
   3   1   5  492.23    4.24   0
   3   5   7  521.74    3.91   0
   3   6   7    8.30    2.05   0
   3   7   7  108.75    2.44   0
   3   8   7   38.05    2.20   0
   3   9   7  143.50    2.63   0
   3  12   6    1.43    2.18   0
   4  -8 -10    7.27    1.88   0
   4  -7  -6  264.94    3.45   0
   4   0   5    0.88    1.80   0
   4  11   7    1.29    2.19   0
   5  -9 -15   39.26    2.51   0
   5  -9 -14   -2.90    2.17   0
   5  -9 -13   12.30    2.20   0
   5  -8  -8   31.88    1.88   0
   5  -7  -5  453.53    4.52   0
   5   6   8    8.37    2.09   0
   5   7   8   13.33    1.94   0
   5   8   8   69.91    2.49   0
   5   9   8    5.95    2.19   0
   5  10   8    4.66    2.89   0
   6  -9 -13   -3.40    3.34   0
   6  -9 -12    0.13    2.21   0
   6  -8  -7   12.67    2.14   0
   6  -7  -4  213.29    3.21   0
   6  -5   0    1.60    3.00   0
   6  -1   5    6.83    2.81   0
   6   2   7   17.83    2.19   0
   6   4   8  185.18    3.18   0
   6   5   8   31.48    2.15   0
   6   9   8   16.32    2.31   0
   6  10   8    3.53    2.30   0
   7  -8  -7   34.07    3.12   0
   7  -7  -4   23.03    2.97   0
   7  -1   5   38.44    3.29   0
   7   2   7    5.87    1.97   0
   7   4   8   12.29    2.72   0
   7   5   8   36.71    2.14   0
   8  -8  -7    6.79    2.76   0
   8  -7  -4    4.06    2.75   0
   8  -5   0    8.16    3.03   0
   8   2   7    6.48    2.47   0
   8   5   8   42.16    3.15   0
   8   6   8    7.75    2.29   0
   9  -4   1   21.60    4.65   0
   9   1   6   48.40    3.02   0
   9   3   7   -2.18    3.22   0
  -3   2 -19   -6.53    2.92   0
  -3   9  -5   84.58    3.12   0
  -3  10  -5   12.25    2.93   0
  -3  11  -6   15.54    3.48   0
  -3  12  -7   -0.53    3.65   0
  -2  -1 -20   29.03    2.46   0
  -2  -1 -19   18.64    2.66   0
  -2  -1 -10  384.35    3.91   0
  -2   0  -7   83.04    3.04   0
  -2   1  -5 2152.30   12.42   0
  -2   6  -1   84.62    2.61   0
  -2   9  -1    2.14    2.07   0
  -2  13  -3   -1.69    3.03   0
  -1  -3 -20   30.41    2.59   0
  -1  -3 -19   40.07    2.72   0
  -1  -3 -11    1.66    2.83   0
  -1  -3 -10    0.84    1.90   0
  -1   4   1   42.52    2.44   0
  -1   7   2   74.79    3.27   0
  -1   8   2   71.02    2.35   0
  -1   9   2   51.44    3.10   0
  -1  11   1    9.20    2.23   0
  -1  13   0    8.47    2.88   0
  -1  14  -1   21.73    2.45   0
   0  -5 -17   85.58    2.58   0
   0  -5 -16  166.36    2.67   0
   0  -5 -15   24.24    2.31   0
   0  -5 -14  121.91    2.59   0
   0  -4  -8 1113.45    4.92   0
   0  -3  -5  608.49    4.33   0
   0  -2  -3   15.35    2.90   0
   0   7   4  570.84    4.32   0
   0   8   4   30.11    2.18   0
   0   9   4 1051.92    5.12   0
   0  11   3   -0.13    2.25   0
   0  12   3   -4.50    3.07   0
   0  13   2    4.33    2.10   0
   0  14   1   -1.49    2.42   0
   1  -6 -19   24.79    2.27   0
   1  -6 -18    1.52    2.09   0
   1  -6 -17   11.09    2.14   0
   1  -6 -16   10.03    2.01   0
   1  -6 -15   56.24    2.20   0
   1  -6 -14  334.48    3.01   0
   1  -6 -13  114.57    2.40   0
   1  -6 -12  219.39    2.72   0
   1  -5  -7 1866.87    6.23   0
   1   5   5 1895.38    6.24   0
   1  10   5   50.04    2.40   0
   1  11   5  111.50    3.09   0
   1  13   4   25.00    3.32   0
   1  14   3    6.84    2.28   0
   2  -7 -19   -4.40    2.31   0
   2  -7 -18   18.34    2.33   0
   2  -7 -17    2.76    2.22   0
   2  -7 -16   20.31    2.21   0
   2  -7 -15    9.60    2.20   0
   2  -7 -14    9.82    1.90   0
   2  -7 -13    6.02    2.05   0
   2  -6  -8  336.09    3.54   0
   2   2   5   27.86    2.69   0
   2  11   6   26.96    2.35   0
   2  13   5    1.30    2.14   0
   3  -7  -9    0.76    1.85   0
   3  -6  -5    1.06    2.19   0
   3  -3   1   32.60    2.75   0
   3  11   7    7.21    1.93   0
   3  13   6   -5.96    2.32   0
   4  -8 -13   62.55    3.16   0
   4  -8 -12   19.92    2.09   0
   4  -8 -11    9.39    2.02   0
   4  -7  -7    4.98    3.05   0
   4   1   6  210.59    3.86   0
   4   3   7  305.79    3.12   0
   4   6   8  198.26    2.81   0
   4   7   8   34.42    2.16   0
   4   8   8   19.70    2.00   0
   4   9   8  114.26    2.71   0
   4  10   8    9.04    2.69   0
   4  12   7    2.17    2.25   0
   5  -8  -9    0.32    2.10   0
   5   2   7  265.72    3.33   0
   5   4   8  178.99    3.54   0
   5  11   8    3.39    2.19   0
   6  -8  -8    4.40    2.14   0
   6  -6  -2   93.48    2.81   0
   6   0   6   -0.75    2.96   0
   7  -8  -8   14.71    2.92   0
   7  -6  -2   20.24    2.65   0
   7  -5   0    3.33    2.71   0
   7   0   6   -0.23    2.98   0
   8  -8  -8    5.83    3.14   0
   8  -6  -2    1.68    2.15   0
   8  -2   4    6.29    3.65   0
   8  -1   5   25.03    3.26   0
   8   4   8   -1.93    2.14   0
  -3   2 -17    7.89    2.94   0
  -3   3 -20    2.95    2.99   0
  -3   3  -8   15.26    3.27   0
  -3   8  -4   80.79    3.46   0
  -3  11  -5   17.87    3.26   0
  -3  12  -6   -5.53    3.35   0
  -2  -1 -18    3.44    2.35   0
  -2  -1 -17   -0.49    2.07   0
  -2  -1 -16   26.06    2.59   0
  -2  -1 -15    4.09    3.03   0
  -2  -1 -13   13.33    2.85   0
  -2  -1 -11  260.95    3.31   0
  -2   0 -21   -3.88    2.47   0
  -2   5  -1  845.81    6.83   0
  -2  11  -1    6.27    2.20   0
  -2  12  -2   -6.32    2.39   0
  -2  14  -4    8.66    2.47   0
  -1  -3 -18   19.38    2.30   0
  -1  -3 -17   39.14    2.23   0
  -1  -3 -16   11.07    2.01   0
  -1  -3 -15  110.05    2.85   0
  -1  -3 -14   20.97    2.75   0
  -1  -3 -13  143.07    2.64   0
  -1  -3 -12   44.32    2.20   0
  -1  -2 -21   28.15    3.05   0
  -1  -2  -7 1842.71    7.01   0
  -1   6   2 2726.45    8.13   0
  -1  10   2    0.29    2.25   0
  -1  11   2    8.88    2.75   0
  -1  12   1   32.45    2.44   0
  -1  14   0   40.14    3.02   0
   0  -4 -21   21.67    2.36   0
   0  -4 -20   10.96    2.45   0
   0  -4  -9   14.00    1.80   0
   0  10   4   46.83    2.26   0
   0  11   4    3.41    2.87   0
   0  13   3    2.87    2.90   0
   0  14   2    5.40    2.34   0
   1  -5 -21    1.60    2.74   0
   1  -5  -8  228.86    2.85   0
   1  -4  -5  583.04    4.25   0
   1   0   2   10.81    2.57   0
   1   1   3    5.11    2.72   0
   1   4   5  553.52    3.67   0
   1   7   6   85.07    3.21   0
   1   8   6   57.06    3.03   0
   1   9   6   -0.06    3.07   0
   1  12   5   10.08    2.20   0
   1  14   4    2.86    3.12   0
   2  -6  -9  247.12    3.17   0
   2  -5  -5  340.17    3.14   0
   2   6   7  372.62    3.77   0
   2   7   7   -1.70    2.05   0
   2  10   7   24.35    2.79   0
   2  12   6    2.98    2.15   0
   2  13   6   14.85    2.88   0
   2  14   5   -5.17    2.40   0
   3  -7 -19    3.07    2.90   0
   3  -7 -11  167.05    3.34   0
   3  -7 -10    4.96    1.95   0
   3  -6  -6   59.72    3.01   0
   3  -5  -3  433.38    3.78   0
   3   2   6  146.14    2.62   0
   3   7   8   56.05    3.24   0
   3   9   8    9.17    2.67   0
   3  12   7   -0.94    2.42   0
   4  -8 -17    4.90    2.18   0
   4  -8 -16   -5.84    2.20   0
   4  -8 -15   15.15    2.15   0
   4  -8 -14   14.78    2.03   0
   4  -7  -8   92.03    3.28   0
   4  -6  -4  123.20    2.55   0
   4   5   8    6.34    1.93   0
   4  11   8   52.00    2.56   0
   4  12   8   10.97    2.96   0
   5  -8 -11   -0.90    2.05   0
   5  -8 -10    4.09    2.04   0
   5  -7  -6   11.99    2.19   0
   5  -6  -3   36.66    2.14   0
   5  -4   1  502.00    6.05   0
   5   7   9  166.41    2.86   0
   5   8   9   -5.55    2.34   0
   5   9   9   -1.26    2.27   0
   5  10   9   -3.87    2.70   0
   6  -8  -9   13.31    2.14   0
   6  -7  -5   52.77    2.33   0
   6   3   8  111.39    2.73   0
   6   6   9   13.62    2.23   0
   6   7   9    3.43    2.05   0
   6   8   9   -2.23    2.32   0
   6   9   9    1.47    2.25   0
   7  -8  -9   -3.25    3.18   0
   7  -7  -5   70.14    3.14   0
   7   1   7    1.63    2.44   0
   7   3   8   15.95    2.22   0
   7   6   9   -2.61    2.36   0
   7   7   9   32.56    2.30   0
   7   8   9    3.71    2.39   0
   8  -7  -5    6.01    2.76   0
   8   0   6   16.38    3.19   0
   8   3   8   39.27    2.97   0
   9  -6  -3   11.46    3.16   0
   9   2   7    0.21    3.00   0
  -3   2 -14    1.71    2.70   0
  -3   2 -12    1.34    2.00   0
  -3   3 -19   33.93    2.78   0
  -3   7  -4   54.65    3.66   0
  -3   9  -4    6.50    2.59   0
  -3  10  -4   89.88    3.79   0
  -3  13  -7   10.48    2.87   0
  -2   0 -20   12.01    2.31   0
  -2   0 -19   -2.14    2.87   0
  -2   0  -8  720.32    5.49   0
  -2   7   0    8.80    2.28   0
  -2   8   0  154.85    2.78   0
  -2   9   0  134.61    2.65   0
  -2  10   0   78.14    3.43   0
  -2  12  -1   38.19    2.49   0
  -2  13  -2    7.99    2.54   0
  -2  14  -3   20.21    2.70   0
  -1  -2 -20   15.89    2.32   0
  -1  -2  -8 2213.93    7.46   0
  -1  -1  -5  490.18    4.98   0
  -1   5   2  695.67    4.54   0
  -1   8   3   44.52    2.79   0
  -1   9   3  248.86    3.51   0
  -1  12   2   19.93    3.21   0
  -1  13   1    1.96    2.15   0
   0  -4 -18   55.72    2.37   0
   0  -4 -17   22.72    2.60   0
   0  -4 -16   47.56    2.95   0
   0  -4 -12   21.02    2.89   0
   0  -4 -11  104.49    2.45   0
   0  -4 -10   68.57    2.43   0
   0  -3 -22    8.97    3.13   0
   0  -3  -6 1545.41    6.21   0
   0   3   3   -3.84    1.92   0
   0   5   4 1424.09    5.53   0
   0   8   5   20.33    2.58   0
   0   9   5   11.57    2.66   0
   0  12   4   25.32    2.39   0
   0  14   3   24.80    2.83   0
   1  -5 -20   18.15    2.31   0
   1  -5 -19   78.96    2.69   0
   1  -5 -18    0.17    2.87   0
   1  -5 -10  754.49    4.10   0
   1  -5  -9    1.26    2.19   0
   1   2   4  107.42    2.74   0
   1   6   6  279.12    3.03   0
   1  10   6   48.94    2.16   0
   1  11   6    2.79    2.10   0
   1  13   5    9.86    2.27   0
   2  -6 -20    0.98    2.28   0
   2  -6 -19   -1.08    2.18   0
   2  -6 -18   16.28    3.09   0
   2  -6 -11   26.81    2.70   0
   2  -6 -10    7.80    2.02   0
   2  -2   1  546.58    8.47   0
   2   3   6  270.26    2.93   0
   2  11   7   42.15    2.34   0
   3  -7 -18   -0.87    2.23   0
   3  -7 -17   57.16    2.37   0
   3  -7 -16   30.95    2.08   0
   3  -7 -14   -2.36    2.14   0
   3  -7 -13    3.42    1.90   0
   3  -7 -12   76.12    2.36   0
   3  -6  -7    4.11    2.64   0
   3  -4  -1  207.90    3.37   0
   3   5   8   -0.53    2.64   0
   3   6   8  281.37    3.00   0
   3  10   8   39.87    2.36   0
   3  11   8   -0.40    2.00   0
   3  13   7   17.62    2.34   0
   4  -7  -9   12.47    2.80   0
   4  -5  -2  288.69    4.25   0
   4   2   7  687.96    4.57   0
   4   4   8    8.44    2.06   0
   4   7   9   36.27    2.32   0
   4   8   9   33.49    2.09   0
   4   9   9    9.21    2.19   0
   4  10   9    6.66    3.04   0
   5  -8 -16   -2.24    2.19   0
   5  -8 -15   24.19    2.20   0
   5  -8 -14   58.69    2.72   0
   5  -8 -13   16.01    2.28   0
   5  -8 -12  109.98    2.38   0
   5  -5  -1  669.10    5.31   0
   5  -1   5  109.59    3.61   0
   5   0   6    1.75    2.63   0
   5   5   9   32.40    2.98   0
   5  11   9   20.00    2.47   0
   6  -8 -12   -2.32    3.21   0
   6  -8 -11   33.72    2.45   0
   6  -8 -10    2.68    1.97   0
   6  -7  -6  157.73    3.43   0
   6  -6  -3   75.22    3.36   0
   6   1   7   29.90    2.22   0
   6   5   9   -0.67    2.21   0
   7  -8 -10   17.18    2.33   0
   7   5   9   10.62    2.25   0
   8   1   7   17.18    2.85   0
   8   5   9    0.09    2.42   0
   9  -5  -1   13.88    3.16   0
  -3  11  -4    1.43    3.38   0
  -3  12  -5   -4.50    2.72   0
  -3  13  -6    1.32    2.73   0
  -2   0 -18    3.09    2.25   0
  -2   0 -17   -2.19    2.81   0
  -2   0  -9   -5.48    2.93   0
  -2   1 -21    0.25    2.53   0
  -2   6   0  321.55    3.62   0
  -2  11   0   10.43    2.12   0
  -2  13  -1   31.85    2.65   0
  -2  14  -2    5.48    2.66   0
  -1  -2 -19   30.71    2.21   0
  -1  -2 -18    6.16    2.23   0
  -1  -2 -17   -0.01    2.67   0
  -1  -2  -9  746.81    4.45   0
  -1  -1 -22    0.95    2.49   0
  -1   0  -3 2254.14   13.37   0
  -1   3   1    5.93    2.97   0
  -1   7   3  114.14    2.59   0
  -1  10   3    2.45    2.14   0
  -1  11   3   34.85    3.06   0
  -1  13   2   -0.90    2.21   0
  -1  14   1   25.26    2.44   0
   0  -4 -15   51.71    2.45   0
   0  -4 -14  348.62    3.34   0
   0  -4 -13   24.76    2.11   0
   0  -3 -21   11.15    2.21   0
   0  -3  -7   94.83    2.73   0
   0   4   4  406.73    3.96   0
   0   6   5  168.19    3.02   0
   0   7   5  121.45    2.87   0
   0  10   5   80.95    2.40   0
   0  11   5   14.00    2.08   0
   0  13   4   22.55    2.36   0
   1  -5 -17  103.14    2.57   0
   1  -5 -16  182.23    2.64   0
   1  -5 -15   13.10    1.90   0
   1  -5 -14  100.44    2.39   0
   1  -5 -13  411.56    3.20   0
   1  -5 -12  112.45    2.43   0
   1  -5 -11    4.95    2.12   0
   1  -4  -6  489.09    3.53   0
   1  -3  -3 2653.92    9.29   0
   1  -2  -1 3942.25   15.08   0
   1   3   5  346.16    3.88   0
   1   5   6 1083.79    4.70   0
   1   9   7  581.31    4.11   0
   1  12   6   -0.70    2.20   0
   1  13   6    1.46    2.93   0
   1  14   5    0.30    2.30   0
   2  -6 -17   28.76    2.24   0
   2  -6 -16   -6.65    2.29   0
   2  -6 -15  205.63    2.79   0
   2  -6 -14   63.82    2.41   0
   2  -6 -13   93.18    2.42   0
   2  -6 -12   76.99    2.33   0
   2  -5  -6  117.10    2.49   0
   2  -4  -3  988.10    5.39   0
   2   7   8  186.05    3.13   0
   2   8   8   12.51    2.11   0
   2   9   8   14.94    1.99   0
   2  10   8   48.51    3.00   0
   2  13   7    7.06    2.34   0
   3  -6  -8   75.17    2.98   0
   3  -5  -4  323.47    3.81   0
   3   8   9    4.63    2.74   0
   3   9   9    0.74    2.80   0
   3  12   8   -0.56    2.28   0
   4  -7 -18   15.09    2.97   0
   4  -7 -11   -6.47    2.68   0
   4  -7 -10   68.06    2.24   0
   4  -6  -5    2.94    1.92   0
   4  -4   0  372.18    4.50   0
   4   5   9   -3.57    2.85   0
   4   6   9  315.41    3.11   0
   4  11   9   12.44    2.14   0
   5  -7  -8   21.32    2.56   0
   5  -6  -4  274.75    3.61   0
   5   1   7   63.64    2.45   0
   5   4   9  264.62    3.61   0
   5   8  10   -3.18    2.74   0
   5   9  10   16.43    3.22   0
   5  10  10   39.64    2.71   0
   6  -8 -14   -0.69    2.23   0
   6  -8 -13   62.67    2.51   0
   6  -7  -7    1.48    2.56   0
   6   2   8    6.25    2.04   0
   6   4   9   30.03    2.01   0
   6   7  10    2.36    2.33   0
   6   8  10   -1.35    2.21   0
   6   9  10    5.85    2.16   0
   7  -8 -12   25.13    2.32   0
   7  -8 -11    0.81    2.21   0
   7  -7  -6   11.13    2.12   0
   7  -6  -3   10.78    2.53   0
   7   2   8    7.31    2.17   0
   7   4   9    0.98    1.97   0
   7   7  10    5.22    2.27   0
   8  -7  -6   14.78    2.30   0
   8  -6  -3   46.42    2.39   0
   8   4   9   34.23    3.04   0
   9  -1   5   -0.31    3.20   0
   9   0   6    1.40    2.65   0
  -3   3 -16    5.48    2.90   0
  -3   4 -19    2.14    2.62   0
  -3   6  -4   10.15    3.31   0
  -3   8  -3    3.25    2.26   0
  -3   9  -3   10.23    2.47   0
  -3  10  -3   11.55    2.42   0
  -3  11  -3   81.63    3.64   0
  -3  12  -4   -0.19    2.52   0
  -3  13  -5    5.75    2.60   0
  -2   0 -16  196.16    3.18   0
  -2   0 -15   14.93    2.78   0
  -2   0 -14  106.34    3.47   0
  -2   0 -11    0.71    2.96   0
  -2   0 -10    3.91    2.04   0
  -2   1 -20   31.43    2.56   0
  -2   1  -6   30.88    2.84   0
  -2   8   1    6.44    2.03   0
  -2   9   1  325.25    3.49   0
  -2  10   1   76.62    2.73   0
  -2  11   1   33.20    2.77   0
  -2  12   0   25.90    2.51   0
  -2  13   0    0.14    3.02   0
  -2  14  -1    9.97    3.48   0
  -1  -2 -16    1.60    1.86   0
  -1  -2 -15    7.20    2.00   0
  -1  -2 -14  612.35    4.49   0
  -1  -2 -13  677.33    4.59   0
  -1  -2 -12  394.22    3.91   0
  -1  -2 -11  148.98    2.80   0
  -1  -2 -10   10.71    2.03   0
  -1  -1 -21   -0.05    2.31   0
  -1  -1  -6 1229.03    6.76   0
  -1   2   0 5070.75   20.81   0
  -1   4   2  579.83    4.99   0
  -1   6   3 1445.89    5.80   0
  -1  12   3   47.88    2.51   0
  -1  14   2   -1.98    2.31   0
   0  -3 -20   -3.01    2.26   0
   0  -3 -19   62.85    2.30   0
   0  -3  -8 1157.29    5.43   0
   0  -2 -22    4.71    3.26   0
   0  -2  -4  407.16    4.31   0
   0  12   5   42.24    2.42   0
   0  13   5   -3.59    2.91   0
   0  14   4   -0.63    2.44   0
   1  -4 -21   53.91    2.53   0
   1  -4 -20    5.73    2.45   0
   1  -4  -7   37.61    2.02   0
   1   7   7   94.91    2.42   0
   1   8   7    2.80    2.08   0
   1  10   7   25.43    2.25   0
   1  11   7   57.19    2.37   0
   1  12   7   -1.50    2.45   0
   1  14   6   15.05    3.29   0
   2  -5 -21    0.17    2.37   0
   2  -5 -20   26.46    2.73   0
   2  -5  -7 1696.60    6.12   0
   2  -3  -1 1259.26    7.46   0
   2   4   7    3.74    1.74   0
   2   6   8  250.06    2.74   0
   2  11   8   43.13    2.33   0
   2  12   8    3.09    2.17   0
   3  -6 -20   -1.09    2.37   0
   3  -6 -19    6.31    2.15   0
   3  -6  -9   24.97    2.10   0
   3   0   5    9.78    2.35   0
   3   1   6   67.68    3.11   0
   3   4   8   12.83    1.97   0
   3   6   9   -5.44    2.87   0
   3   7   9  270.43    2.98   0
   3  10   9    4.96    2.13   0
   3  11   9   31.84    2.36   0
   3  12   9   -0.27    3.20   0
   4  -7 -17   27.55    2.28   0
   4  -7 -16   89.46    2.59   0
   4  -7 -15   17.47    1.97   0
   4  -7 -14   51.93    2.21   0
   4  -7 -13   -0.80    2.09   0
   4  -7 -12   -1.74    1.87   0
   4  -6  -6   42.70    2.05   0
   4   8  10   54.40    3.12   0
   4   9  10   36.27    2.08   0
   4  10  10    2.17    3.05   0
   4  11  10    3.04    2.67   0
   5  -7 -10    2.26    2.56   0
   5  -7  -9   70.68    2.36   0
   5  -2   4  202.62    7.44   0
   5   2   8   16.87    2.13   0
   5   6  10   66.41    2.29   0
   5   7  10    6.36    2.12   0
   6  -7  -8   35.54    2.96   0
   6  -6  -4   17.35    3.01   0
   6  -5  -1  204.26    4.17   0
   6  -4   1  108.22    4.10   0
   6   3   9   -0.40    2.65   0
   6   5  10    2.15    2.57   0
   6   6  10    8.24    1.98   0
   7  -7  -7   12.46    2.10   0
   7   5  10   -2.39    2.76   0
   7   6  10   30.22    2.27   0
   8  -7  -7    8.55    2.22   0
   8  -5  -1    3.19    2.91   0
   8  -4   1   76.22    4.28   0
   8   2   8    1.93    2.31   0
   9  -6  -4   24.85    2.46   0
   9   1   7    2.17    3.23   0
  -3   3 -15   -0.08    2.07   0
  -3   3 -13    2.46    2.96   0
  -3   3 -12    2.59    2.77   0
  -3   3 -11    1.46    3.06   0
  -3   3 -10  130.54    4.31   0
  -3   4 -18    0.69    2.63   0
  -3   5 -19    9.05    3.61   0
  -3   7  -3    8.24    2.47   0
  -3  12  -3   12.91    3.27   0
  -3  13  -4   15.50    3.62   0
  -2   0 -13    4.09    2.18   0
  -2   1 -19   19.84    2.34   0
  -2   1 -18   -3.11    3.19   0
  -2   2 -21   -2.02    2.46   0
  -2   4  -1  256.71    4.21   0
  -2   5   0  164.33    3.08   0
  -2   7   1  252.92    3.36   0
  -2  12   1   87.51    2.83   0
  -2  14   0    6.97    3.04   0
  -1  -1 -19    6.17    2.34   0
  -1   0 -22   -1.00    2.55   0
  -1   5   3   13.52    2.39   0
  -1   7   4    6.18    2.87   0
  -1   8   4   47.31    2.25   0
  -1   9   4   29.59    2.24   0
  -1  10   4   37.29    2.37   0
  -1  11   4   10.82    2.17   0
  -1  12   4   10.43    2.88   0
  -1  13   3    4.44    2.20   0
  -1  14   3    3.56    2.73   0
   0  -3 -18  104.17    2.72   0
   0  -3 -17   49.08    2.13   0
   0  -3 -16    4.93    2.64   0
   0  -3  -9  100.29    2.17   0
   0   5   5   93.92    2.19   0
   0   7   6 3321.53    8.28   0
   0   8   6    4.59    2.04   0
   0   9   6  252.15    2.90   0
   0  10   6   52.83    2.41   0
   0  11   6   79.65    2.23   0
   0  12   6   -2.15    3.04   0
   0  14   5    1.79    3.17   0
   1  -4 -19    9.08    2.02   0
   1  -4 -18   -2.92    2.15   0
   1  -4  -8  113.42    2.54   0
   1  -3 -22   40.68    3.01   0
   1  -3  -4  189.79    3.51   0
   1   4   6  144.98    2.31   0
   1   6   7   91.37    2.43   0
   1  13   7   35.37    2.35   0
   2  -5 -19   13.87    2.23   0
   2  -5 -18   55.69    2.13   0
   2  -5 -17   61.61    3.11   0
   2  -5  -9   32.14    2.85   0
   2  -5  -8   14.87    2.22   0
   2  -4  -4  884.56    4.88   0
   2   1   5 2484.30    9.34   0
   2   2   6   38.25    1.95   0
   2   8   9    3.04    2.73   0
   2  11   9    4.06    2.40   0
   2  13   8   23.32    2.31   0
   3  -6 -17    0.54    2.05   0
   3  -6 -16   -2.62    2.06   0
   3  -6 -15    5.75    2.45   0
   3  -6 -14    6.35    2.56   0
   3  -6 -13  137.89    3.01   0
   3  -6 -12   63.40    2.81   0
   3  -6 -11   41.33    2.22   0
   3  -6 -10   74.20    2.24   0
   3  -5  -5  486.88    3.80   0
   3   2   7   53.03    2.13   0
   3   5   9   71.25    3.03   0
   3   9  10   -3.32    2.73   0
   3  10  10   30.59    2.54   0
   4  -6  -7   31.85    2.23   0
   4  -5  -3  140.29    3.14   0
   4   6  10   33.19    2.75   0
   4   7  10   55.41    2.15   0
   5  -7 -17   32.65    2.37   0
   5  -7 -16    9.79    2.26   0
   5  -7 -15   35.33    2.84   0
   5  -7 -14   31.17    2.66   0
   5  -7 -13   41.22    2.77   0
   5  -7 -12    9.07    2.15   0
   5  -7 -11    0.72    2.05   0
   5  -6  -5   33.99    2.18   0
   5  -5  -2   20.88    3.08   0
   5   5  10    3.84    1.99   0
   5   9  11    2.99    3.02   0
   5  10  11   -3.55    3.22   0
   6  -7 -10    4.44    2.76   0
   6  -7  -9   10.80    2.27   0
   6   7  11    4.16    2.70   0
   6   8  11    3.84    2.16   0
   7  -7  -8   -1.17    1.90   0
   7  -6  -4   56.41    2.84   0
   7  -5  -1    8.95    2.06   0
   7  -4   1  108.93    4.35   0
   8  -7  -9    4.76    2.98   0
   8  -7  -8    2.42    2.16   0
   8  -6  -4    4.71    2.02   0
   8   3   9   10.71    2.32   0
   9   2   8    5.31    3.31   0
  -3   4 -17   14.70    2.39   0
  -3   8  -2   11.98    3.38   0
  -3   9  -2   22.79    2.58   0
  -3  10  -2    6.79    2.40   0
  -3  11  -2    2.19    2.46   0
  -3  13  -3   10.22    3.71   0
  -2   1 -17   -1.08    2.02   0
  -2   1  -7   44.09    2.76   0
  -2   2 -20    2.34    2.45   0
  -2   2  -4  451.96    9.96   0
  -2   3  -2 2263.36   16.50   0
  -2   6   1    9.64    1.99   0
  -2   8   2    6.12    2.91   0
  -2   9   2    1.82    2.16   0
  -2  10   2   58.45    2.61   0
  -2  11   2  139.11    2.68   0
  -2  13   1    9.86    2.44   0
  -1  -1 -18   -3.21    2.29   0
  -1  -1 -17   97.56    2.83   0
  -1  -1  -7  209.54    3.06   0
  -1   0 -21   -3.94    2.36   0
  -1   6   4  262.59    3.42   0
  -1  13   4   12.63    2.41   0
   0  -3 -15   46.83    2.17   0
   0  -3 -14  498.43    3.63   0
   0  -3 -13  630.35    3.87   0
   0  -3 -12  159.08    2.57   0
   0  -3 -11  580.58    4.06   0
   0  -3 -10   19.07    1.88   0
   0  -2 -20   73.17    2.56   0
   0  -2  -5 6482.36   13.96   0
   0  -1  -2 7537.57   22.02   0
   0   3   4 1106.84    6.04   0
   0   6   6  186.32    2.69   0
   0  13   6    5.65    2.38   0
   1  -4 -17    0.05    1.96   0
   1  -4 -15  399.84    3.31   0
   1  -4 -14  210.99    3.45   0
   1  -4 -11  186.70    3.33   0
   1  -4 -10    7.53    2.04   0
   1  -4  -9 1589.14    5.70   0
   1  -3 -21    5.90    2.31   0
   1   5   7  529.43    3.53   0
   1   8   8  570.69    3.61   0
   1   9   8  170.22    2.64   0
   1  10   8    3.62    1.99   0
   1  11   8   79.87    2.50   0
   1  12   8    8.23    2.22   0
   2  -5 -16   -1.18    1.87   0
   2  -5 -15   37.86    2.17   0
   2  -5 -14    9.59    2.04   0
   2  -5 -13   95.64    2.95   0
   2  -5 -12   88.80    2.23   0
   2  -5 -11   15.92    1.96   0
   2  -5 -10  322.21    3.02   0
   2  -4 -21   14.20    2.26   0
   2   3   7  304.69    3.06   0
   2   7   9   29.54    2.12   0
   2  12   9   23.91    2.28   0
   3  -5 -20   14.60    2.65   0
   3  -4  -2   49.82    2.11   0
   3   3   8   29.63    2.22   0
   3   7  10  160.47    2.65   0
   3  11  10    1.78    2.30   0
   3  12  10   13.04    2.24   0
   4  -6 -19    9.23    2.30   0
   4  -6 -18    3.19    2.13   0
   4  -6  -9    5.96    2.73   0
   4  -6  -8  210.70    2.75   0
   4   0   6  723.59    5.72   0
   4   2   8   44.52    2.16   0
   4   5  10  374.04    4.04   0
   4   8  11   90.52    2.89   0
   4   9  11    1.34    2.97   0
   4  10  11   20.27    2.32   0
   4  11  11   -0.62    3.26   0
   5  -6  -6  162.38    2.89   0
   5   4  10   33.12    2.74   0
   5   7  11    9.28    1.92   0
   5   8  11    2.73    2.25   0
   6  -7 -16   30.26    2.58   0
   6  -7 -15    2.52    2.20   0
   6  -7 -14   48.45    2.96   0
   6  -7 -13    8.05    2.72   0
   6  -7 -12    3.71    1.89   0
   6  -7 -11   12.72    2.23   0
   6  -6  -5  310.49    3.90   0
   6   0   7   11.34    2.82   0
   6   1   8   22.81    2.79   0
   6   4  10   82.15    2.60   0
   6   6  11    2.57    2.98   0
   7  -7 -11    3.81    3.15   0
   7  -7 -10    4.90    2.27   0
   7  -7  -9    4.35    2.09   0
   7   1   8    9.82    2.85   0
   7   4  10   -2.01    2.19   0
   7   6  11   17.71    3.14   0
   8  -7 -11    1.83    3.38   0
   8  -7 -10   -0.13    2.25   0
   8   4  10   13.23    3.21   0
   9  -6  -5    3.26    2.33   0
   9  -5  -2   -1.13    2.82   0
  -3   4 -16    0.75    2.34   0
  -3   4 -15   62.27    3.29   0
  -3   4  -7    6.19    4.31   0
  -3   5 -18    6.21    2.61   0
  -3   6  -3  328.07    5.73   0
  -3   7  -2    7.86    3.19   0
  -3   9  -1    0.54    3.13   0
  -3  10  -1   43.12    3.22   0
  -3  11  -1    7.61    2.82   0
  -3  12  -2   51.17    2.86   0
  -3  13  -2    2.49    3.27   0
  -2   1 -16   24.24    2.16   0
  -2   1 -15    3.56    2.81   0
  -2   2 -19   26.13    2.45   0
  -2   3 -21    6.81    2.66   0
  -2   7   2  628.29    4.56   0
  -2  12   2    8.44    2.45   0
  -2  13   2    2.08    3.53   0
  -2  14   1    2.07    2.59   0
  -1  -1 -16   56.72    2.28   0
  -1  -1 -15    0.84    2.71   0
  -1  -1  -8  284.64    3.21   0
  -1   0 -20    4.02    2.47   0
  -1   0 -19  515.30    4.82   0
  -1   1 -22    2.79    2.45   0
  -1   8   5    2.95    2.00   0
  -1   9   5  256.64    2.93   0
  -1  11   5   94.63    2.51   0
  -1  12   5    5.12    2.17   0
  -1  14   4    0.85    2.35   0
   0  -2 -19  101.42    2.65   0
   0  -2 -18   25.47    2.73   0
   0  -1 -22   27.69    2.39   0
   0   2   3   21.62    2.03   0
   0   4   5  420.66    3.41   0
   0   8   7    3.14    2.09   0
   0   9   7    6.04    2.11   0
   0  10   7    0.49    2.01   0
   0  11   7   13.47    2.21   0
   0  12   7   -1.27    2.04   0
   0  13   7   15.02    2.97   0
   0  14   6    0.09    2.41   0
   1  -4 -12  180.91    2.63   0
   1  -3 -20   15.54    2.36   0
   1  -3 -19   76.27    3.17   0
   1  -3  -5  265.85    3.61   0
   1   2   5  415.01    3.92   0
   1   3   6 2810.01    8.08   0
   1   6   8  107.42    2.45   0
   1  10   9   -7.26    2.65   0
   1  13   8   -1.84    2.27   0
   2  -4 -20    3.34    2.36   0
   2  -4 -19   -1.12    2.84   0
   2  -4  -5  188.14    2.68   0
   2   4   8   11.24    1.99   0
   2   6   9    8.24    2.09   0
   2   9  10   53.41    2.66   0
   2  10  10   21.01    2.20   0
   2  11  10   11.55    3.10   0
   3  -5 -19   38.09    2.46   0
   3  -5 -18   31.75    2.70   0
   3  -5  -7  282.89    4.02   0
   3  -1   4  858.66    9.21   0
   3   4   9   36.67    2.00   0
   3   6  10  244.18    2.95   0
   3  10  11   10.51    3.11   0
   3  11  11    0.61    2.60   0
   4  -6 -17   11.44    2.22   0
   4  -6 -16    3.38    1.90   0
   4  -6 -15   12.50    2.05   0
   4  -6 -14   20.43    2.06   0
   4  -6 -13   10.33    2.41   0
   4  -6 -12   14.43    2.59   0
   4  -6 -11    1.32    2.23   0
   4  -6 -10    2.28    2.07   0
   4  -5  -4   15.67    2.22   0
   4  -4  -1   25.82    2.77   0
   4   3   9  177.94    2.76   0
   4   7  11   40.17    2.28   0
   5  -6  -7  171.89    3.01   0
   5  -4   0  131.53    3.81   0
   5   9  12    1.92    2.70   0
   6  -6  -6   -4.23    2.82   0
   6  -5  -2  163.87    3.68   0
   6   2   9    5.41    2.01   0
   6   5  11    2.88    2.72   0
   6   8  12    1.33    3.35   0
   7  -7 -14   -4.66    2.48   0
   7  -7 -13   -1.79    2.26   0
   7  -7 -12    9.37    2.12   0
   7  -6  -5   -0.46    2.08   0
   7  -1   6   19.93    3.53   0
   7   2   9   15.73    2.20   0
   7   5  11   19.02    3.17   0
   8  -6  -5   -0.43    2.05   0
   8  -5  -2   41.55    3.31   0
   8   0   7    0.42    2.63   0
   8   1   8    1.09    2.99   0
   8   2   9    4.44    2.79   0
   9  -6  -6    9.03    2.74   0
  -3   4 -14   15.52    2.96   0
  -3   5 -17   32.82    3.34   0
  -3  12  -1   -2.78    2.76   0
  -3  13  -1   11.16    3.54   0
  -3  14  -2   -1.00    4.16   0
  -2   1 -14   49.65    2.49   0
  -2   1 -13   12.69    2.94   0
  -2   1 -12  274.87    4.06   0
  -2   1  -8  101.51    2.94   0
  -2   2 -18   17.08    2.33   0
  -2   3 -20   31.56    2.49   0
  -2   8   3  323.55    3.83   0
  -2   9   3   50.40    2.41   0
  -2  10   3   36.64    2.44   0
  -2  11   3   20.08    2.08   0
  -2  12   3    3.45    2.33   0
  -2  14   2    2.60    2.52   0
  -1  -1 -13  126.47    2.48   0
  -1  -1 -11  710.05    4.58   0
  -1  -1 -10    5.06    1.83   0
  -1  -1  -9  944.94    5.28   0
  -1   0  -4    1.28    1.91   0
  -1   1 -21    2.49    2.30   0
  -1   3   2  381.29    4.77   0
  -1   4   3  755.04    4.94   0
  -1   5   4   18.61    1.80   0
  -1   7   5  882.17    4.71   0
  -1   9   6   -3.38    2.95   0
  -1  10   6   24.12    3.03   0
  -1  11   6   34.72    2.83   0
  -1  13   5   -1.53    2.38   0
  -1  14   5    3.40    3.38   0
   0  -2 -17    6.34    1.99   0
   0  -2 -16    3.53    2.71   0
   0  -2  -6  569.22    4.27   0
   0  -1 -21    5.59    2.28   0
   0   5   6 3090.85    7.91   0
   0   7   7   98.94    2.50   0
   0  10   8    7.92    2.89   0
   0  11   8  105.21    3.55   0
   0  14   7   -0.02    2.54   0
   1  -3 -18  143.91    2.78   0
   1  -3 -17   47.39    2.79   0
   1  -2 -22    2.46    2.22   0
   1  -2 -21   30.42    3.22   0
   1   1   4 1865.92    9.02   0
   1   4   7    3.11    1.72   0
   1   8   9   11.67    2.24   0
   1   9   9    4.69    1.91   0
   1  11   9   51.53    2.43   0
   1  12   9   -2.76    2.27   0
   1  13   9    1.03    2.52   0
   2  -4 -18   -0.86    2.12   0
   2  -4 -17   43.86    2.93   0
   2  -4  -6   83.44    2.27   0
   2  -3 -22    4.57    2.39   0
   2  -3  -2 1140.61    6.50   0
   2   5   9  337.00    3.04   0
   2   7  10   12.20    2.15   0
   2   8  10   27.56    2.07   0
   2  12  10   -2.54    2.23   0
   3  -5 -17   71.55    2.36   0
   3  -5 -16   65.24    2.47   0
   3  -5 -15   40.25    2.78   0
   3  -5  -9  103.24    2.90   0
   3  -5  -8    8.95    2.06   0
   3  -4 -21   21.01    2.68   0
   3  -4  -3 3357.14    9.67   0
   3  -3   0    5.47    2.44   0
   3   5  10  393.90    3.29   0
   3   7  11   58.72    2.98   0
   3   8  11   -4.67    2.05   0
   4  -5 -20   -0.73    2.32   0
   4  -5  -5   41.57    2.87   0
   4  -1   5  810.08    7.90   0
   4   4  10   18.34    2.25   0
   4   6  11   36.98    2.06   0
   4   9  12    8.47    3.15   0
   4  10  12   11.32    2.16   0
   5  -6 -18   20.33    2.26   0
   5  -6 -17   -3.82    2.31   0
   5  -6 -16   -1.02    2.11   0
   5  -6 -15   21.55    2.83   0
   5  -6 -10   16.78    2.67   0
   5  -6  -9  125.45    2.47   0
   5  -6  -8   32.11    2.26   0
   5  -5  -3  575.61    4.39   0
   5   1   8  969.44    5.59   0
   5   2   9  297.72    3.59   0
   5   5  11    3.45    1.97   0
   5   7  12   46.07    3.08   0
   6  -6  -7   76.26    3.01   0
   6  -1   6   30.47    3.28   0
   6   3  10   11.62    2.00   0
   6   7  12    8.66    2.05   0
   7  -6  -6   -0.74    2.16   0
   7  -5  -2    1.41    2.02   0
   7   3  10    5.11    1.99   0
   8  -6  -6    0.59    2.13   0
   8   3  10   11.43    3.09   0
   9  -6  -7   -1.82    2.46   0
   9  -5  -3   15.49    3.06   0
   9  -4   0   11.85    2.95   0
  -4  10 -11    1.59    7.62   0
  -4  10 -10   -0.06    6.94   0
  -4  10  -9    2.81    6.57   0
  -4  11 -11    1.08    6.15   0
  -4  11 -10    4.22    5.33   0
  -4  11  -9   -0.79    4.86   0
  -4  11  -8   14.07    6.36   0
  -3   5 -16    3.39    3.04   0
  -3   5  -4   22.36    3.32   0
  -3   6 -18   -0.78    3.07   0
  -3   9   0    0.90    3.26   0
  -3  10   0   41.70    2.59   0
  -3  11   0    7.16    2.40   0
  -3  12   0   41.41    3.73   0
  -3  14  -1   10.72    4.07   0
  -2   1 -11  270.32    3.57   0
  -2   1 -10  382.85    4.22   0
  -2   3 -19    1.61    2.87   0
  -2   6   2    8.49    1.97   0
  -2   7   3  524.87    4.77   0
  -2  10   4   21.95    3.25   0
  -2  11   4   29.97    2.98   0
  -2  12   4   -3.47    2.83   0
  -2  13   3   -1.39    2.60   0
  -2  14   3   14.34    3.60   0
  -1   0 -17   40.17    2.16   0
  -1   1 -20   40.02    2.66   0
  -1   6   5   24.97    1.97   0
  -1   8   6  139.86    2.54   0
  -1  12   6   -2.28    2.32   0
  -1  13   6    6.26    2.49   0
   0  -2 -15   21.43    2.13   0
   0  -2 -14   10.75    2.63   0
   0  -2  -7 1265.29    5.72   0
   0  -1 -19   53.25    2.38   0
   0   0 -22   40.20    2.51   0
   0   1   2 7573.67   21.91   0
   0   6   7    3.07    2.17   0
   0   8   8  211.52    2.70   0
   0   9   8   74.66    2.23   0
   0  12   8   48.37    2.30   0
   0  13   8   20.21    2.38   0
   1  -3 -16  119.07    2.42   0
   1  -3 -15  294.87    3.66   0
   1  -3  -7 1315.35    5.59   0
   1  -3  -6  163.79    2.56   0
   1  -2  -2 3353.14   12.55   0
   1   5   8  126.32    2.52   0
   1   7   9  343.53    3.06   0
   1   9  10   64.11    2.73   0
   1  10  10   -6.40    3.10   0
   1  11  10   22.85    2.69   0
   1  12  10   36.69    2.88   0
   2  -4 -16   -3.10    1.99   0
   2  -4 -15   22.01    2.56   0
   2  -4  -8   52.23    2.73   0
   2  -4  -7  328.70    3.06   0
   2  -3 -21   -1.77    2.11   0
   2  -3 -20    6.18    2.95   0
   2   2   7   64.02    2.79   0
   2   6  10    7.98    2.04   0
   2   9  11   18.99    2.35   0
   2  10  11   38.23    2.13   0
   2  11  11    6.96    2.16   0
   2  12  11    5.49    2.35   0
   3  -5 -14   13.22    1.85   0
   3  -5 -13   11.24    2.03   0
   3  -5 -12   39.46    2.13   0
   3  -5 -11  232.49    2.74   0
   3  -5 -10   23.90    2.07   0
   3  -4 -20    3.58    2.18   0
   3   2   8   27.90    2.09   0
   3   3   9  328.48    3.79   0
   3   6  11   -4.77    2.98   0
   3   9  12    4.06    2.60   0
   3  11  12   -8.02    3.20   0
   4  -5 -18   26.40    2.31   0
   4  -5  -6  310.77    3.62   0
   4   5  11    2.41    1.89   0
   4   7  12   23.82    2.88   0
   4   8  12   10.59    2.15   0
   5  -6 -14  188.68    2.76   0
   5  -6 -13   31.73    2.32   0
   5  -6 -12   22.06    2.01   0
   5  -6 -11    0.75    1.85   0
   5  -5  -4  206.52    3.45   0
   5   3  10    2.96    1.96   0
   5   4  11  130.33    2.90   0
   5   6  12   -2.67    2.93   0
   6  -6 -17    0.44    2.37   0
   6  -6 -16   -1.48    2.16   0
   6  -6 -15  106.69    3.38   0
   6  -6  -9   35.59    2.61   0
   6  -6  -8    8.33    1.95   0
   6  -5  -3   18.47    3.14   0
   6   4  11   15.23    2.16   0
   6   6  12   20.41    2.39   0
   7  -6  -8    0.77    2.86   0
   7  -6  -7    3.47    2.11   0
   7   4  11    8.51    2.30   0
   7   6  12    5.11    2.47   0
   8  -6  -8   10.19    3.03   0
   8  -6  -7   31.56    2.48   0
   8  -1   6   11.74    3.16   0
   9  -3   2   -0.27    3.71   0
  -4   9  -9   -0.78    6.10   0
  -4  10  -8    1.50    5.16   0
  -4  10  -7    2.33    6.29   0
  -4  11  -7    1.02    5.37   0
  -4  12  -8    6.38    5.12   0
  -4  12  -7   -5.55    4.50   0
  -3   4 -12    5.52    2.96   0
  -3   4 -11   73.93    3.53   0
  -3   4  -8    6.86    3.59   0
  -3   5 -15    2.19    3.11   0
  -3   6 -17    2.73    3.20   0
  -3   8   0   72.96    2.82   0
  -3  10   1    1.53    3.08   0
  -3  11   1   -0.03    3.22   0
  -3  12   1    3.28    3.19   0
  -3  13   0    9.33    2.72   0
  -3  14   0   47.21    3.82   0
  -2   2 -16  112.97    2.72   0
  -2   2 -15   -0.72    2.69   0
  -2   3 -18   46.98    3.13   0
  -2   4 -20   18.56    2.93   0
  -2   8   4   81.22    3.16   0
  -2   9   4  671.41    4.25   0
  -2  13   4   18.60    2.43   0
  -2  14   4   -1.37    3.03   0
  -1   0 -16   -1.34    2.08   0
  -1   0 -15  200.88    3.56   0
  -1   0  -5  114.04    3.38   0
  -1   1 -19    6.28    2.32   0
  -1   2 -21   20.41    2.29   0
  -1   7   6   57.11    2.25   0
  -1   9   7  183.05    3.59   0
  -1  10   7   19.00    2.28   0
  -1  11   7    4.80    2.12   0
  -1  12   7   14.15    2.12   0
  -1  13   7    3.03    2.92   0
  -1  14   6    4.56    2.24   0
   0  -2 -13   29.74    2.16   0
   0  -2 -12  955.91    4.70   0
   0  -2 -11    3.42    2.00   0
   0  -2 -10  858.72    4.52   0
   0  -2  -9  240.28    2.90   0
   0  -1 -18    3.98    1.94   0
   0  -1  -3  162.85    3.63   0
   0   0 -21   -5.49    2.26   0
   0   3   5  616.20    4.35   0
   0   4   6   81.88    2.30   0
   0   5   7  628.84    4.32   0
   0   7   8   88.03    2.50   0
   0   9   9    0.60    2.75   0
   0  10   9    0.79    1.96   0
   0  11   9   -0.30    2.09   0
   0  12   9   21.85    2.46   0
   0  13   9    1.23    2.90   0
   1  -3 -14  579.49    3.71   0
   1  -3 -13   69.70    2.17   0
   1  -3 -12   52.14    2.86   0
   1  -3 -11  149.24    3.35   0
   1  -3 -10  134.72    3.06   0
   1  -3  -9 1476.73    5.71   0
   1  -3  -8  190.70    2.49   0
   1  -2 -19    8.38    2.17   0
   1  -1 -22   10.29    2.29   0
   1   6   9   47.54    2.14   0
   1   8  10   53.43    2.13   0
   1  13  10    6.09    2.30   0
   2  -4 -14  151.60    2.57   0
   2  -4 -13  185.44    2.62   0
   2  -4 -12  338.94    3.04   0
   2  -4 -11  144.11    2.57   0
   2  -4 -10  582.75    3.88   0
   2  -3 -19   23.08    2.06   0
   2  -2 -22   14.64    2.17   0
   2   1   6   19.02    1.97   0
   2   4   9   16.45    2.15   0
   2   7  11   50.47    3.13   0
   2   8  11   31.32    2.16   0
   3  -4 -19    2.10    2.29   0
   3  -4 -18    7.29    2.09   0
   3  -4  -4  616.62    4.30   0
   3   4  10  130.12    2.56   0
   3   8  12   72.59    2.43   0
   4  -5 -17   19.12    2.09   0
   4  -5 -16   50.82    2.28   0
   4  -5 -15   68.69    2.88   0
   4  -5  -7    2.77    1.78   0
   4   1   8  655.21    5.20   0
   4   2   9   65.28    2.23   0
   4   6  12   18.94    2.79   0
   4   9  13   -5.66    2.86   0
   4  10  13   15.56    2.50   0
   5  -5 -19   18.95    2.38   0
   5  -5 -18    4.55    2.82   0
   5  -5  -5  191.27    3.54   0
   5  -3   2   39.20    3.75   0
   5   5  12   18.49    2.68   0
   5   8  13   10.55    2.28   0
   6  -6 -14   20.10    2.42   0
   6  -6 -13   29.02    2.09   0
   6  -6 -12    1.24    2.06   0
   6  -6 -11   31.89    2.24   0
   6  -6 -10   17.64    2.23   0
   6  -4   0  104.36    3.61   0
   6   5  12   25.51    2.25   0
   6   7  13    6.53    3.21   0
   7  -6 -15   -3.65    2.31   0
   7  -6 -14   50.09    2.45   0
   7  -6 -13   19.48    2.89   0
   7  -6 -12   74.36    3.24   0
   7  -6 -11   -5.56    2.57   0
   7  -6 -10   84.27    2.38   0
   7  -6  -9    0.57    2.14   0
   7  -5  -3    0.26    1.96   0
   7   5  12   24.21    2.44   0
   8  -6 -12   24.24    3.10   0
   8  -6 -11   17.54    3.09   0
   8  -6 -10    7.73    2.60   0
   8  -6  -9   12.29    2.10   0
   8  -5  -3   19.22    2.28   0
   8  -4   0   10.49    3.06   0
   9  -5  -4   -0.47    2.73   0
   9   0   7    2.06    3.04   0
  -4  12  -6   -2.57    4.84   0
  -3   4  -9   20.64    2.93   0
  -3   7 -18    0.73    3.34   0
  -3   9   1   61.56    2.79   0
  -3  13   1    2.71    2.74   0
  -3  14   1    8.69    3.49   0
  -2   2 -14   66.86    3.28   0
  -2   3 -17   12.64    3.29   0
  -2   4 -19    5.85    3.22   0
  -2   5   2  150.70    3.33   0
  -2   6   3   47.07    2.16   0
  -2   7   4    0.20    3.23   0
  -2   9   5    7.84    3.20   0
  -2  10   5   37.98    2.25   0
  -2  11   5   25.64    2.34   0
  -2  12   5   25.35    2.32   0
  -2  13   5    1.70    3.41   0
  -1   0 -14   -1.74    2.05   0
  -1   1 -18    2.05    2.33   0
  -1   2 -20   14.68    2.88   0
  -1   2   1 3542.30   14.74   0
  -1   4   4  518.82    4.00   0
  -1   5   5  107.17    2.24   0
  -1   6   6  161.63    2.58   0
  -1   8   7   86.23    2.45   0
  -1  14   7    6.45    2.62   0
   0  -1 -17    8.35    2.03   0
   0  -1 -16    2.77    2.74   0
   0   0 -20   81.45    2.53   0
   0   1 -22   28.35    2.44   0
   0   2   4  424.18    4.64   0
   0   6   8  362.49    3.23   0
   0   8   9    2.72    2.10   0
   1  -2 -18    8.38    2.13   0
   1  -2 -17    8.01    2.74   0
   1  -1 -21   12.01    2.44   0
   1   2   6    3.86    1.84   0
   1   3   7 1898.47    6.38   0
   1   4   8   23.42    1.81   0
   1   5   9   34.96    2.03   0
   1   7  10   -3.28    2.04   0
   1   9  11   -3.46    2.46   0
   1  10  11    3.32    2.11   0
   1  11  11   -3.63    2.29   0
   1  12  11    3.90    2.22   0
   2  -3 -18   60.37    2.39   0
   2  -3 -17  104.35    2.98   0
   2  -3  -3 1451.95    7.04   0
   2  -2 -21    3.71    2.27   0
   2   5  10  549.91    3.51   0
   2   6  11   49.64    2.80   0
   2   9  12    2.11    2.07   0
   2  10  12    5.18    2.23   0
   2  11  12    6.01    2.24   0
   2  12  12    7.57    2.55   0
   3  -4 -17  213.06    3.00   0
   3  -4 -16    2.01    1.85   0
   3  -4  -5    0.70    2.35   0
   3  -3 -21    0.55    2.29   0
   3  -3 -20    5.38    3.18   0
   3   0   6   -3.41    2.71   0
   3   5  11  189.38    2.83   0
   3   7  12   54.79    2.05   0
   3   9  13    4.90    2.73   0
   3  10  13   25.51    2.19   0
   4  -5 -14   32.35    2.02   0
   4  -5 -13   -0.70    1.87   0
   4  -5 -12   55.24    2.19   0
   4  -5 -11   -1.27    2.11   0
   4  -5 -10    3.63    1.96   0
   4  -5  -9   11.13    2.05   0
   4  -5  -8    2.88    2.04   0
   4  -4 -20   -0.03    2.27   0
   4  -4 -19    5.23    2.84   0
   4  -3   1  184.16    4.26   0
   4   0   7   -1.45    2.86   0
   4   4  11  129.89    2.65   0
   4   7  13    3.08    2.34   0
   4   8  13   51.44    2.37   0
   5  -5 -17    3.36    2.27   0
   5  -5 -16   73.07    2.70   0
   5  -5  -6  706.88    4.78   0
   5  -4  -1   89.40    3.49   0
   5  -1   6    0.20    2.58   0
   5   7  13   25.97    2.36   0
   6  -5 -18   -0.42    2.94   0
   6  -5  -4  227.57    3.38   0
   6   1   9   14.25    2.20   0
   6   2  10   69.16    2.39   0
   6   3  11    3.16    2.07   0
   6   6  13   36.25    3.04   0
   7  -5  -4    1.56    2.75   0
   7  -4   0   16.98    2.63   0
   7   1   9   99.32    2.89   0
   7   2  10    4.41    1.96   0
   7   3  11    0.52    2.15   0
   8  -5  -4    2.20    2.65   0
   8   2  10   22.98    2.74   0
   9  -5  -5   13.07    2.97   0
   9  -4  -1   24.02    3.31   0
  -4   9  -7   -0.50    4.22   0
  -4  10  -5    0.52    4.86   0
  -4  12  -5    4.92    3.52   0
  -4  13  -5   -0.12    4.50   0
  -3   5 -14    3.66    2.49   0
  -3   6 -16    3.24    2.82   0
  -3   7   0   12.21    2.25   0
  -3   9   2    0.35    3.29   0
  -3  11   2   -2.23    2.25   0
  -3  13   2    2.99    2.80   0
  -3  14   2    5.33    3.57   0
  -2   3 -16    6.12    2.76   0
  -2   4   1    6.40    2.47   0
  -2   5 -20   13.64    3.11   0
  -2   8   5    0.68    2.01   0
  -2  10   6   13.01    2.68   0
  -2  11   6  128.82    3.63   0
  -2  12   6    2.60    2.87   0
  -2  13   6   13.31    3.04   0
  -2  14   5    5.91    2.45   0
  -1   0 -13  122.64    2.53   0
  -1   0 -12   -0.23    1.98   0
  -1   0 -11 1543.44    6.94   0
  -1   0  -6    2.08    1.90   0
  -1   1 -17   94.46    2.46   0
  -1   2 -19   33.61    2.93   0
  -1   3 -21    6.39    2.91   0
  -1   3   3 2558.73    9.05   0
  -1   7   7  185.39    2.70   0
  -1   9   8   53.43    2.32   0
  -1  10   8   10.69    2.06   0
  -1  12   8   -0.68    2.23   0
  -1  13   8   22.29    2.42   0
   0  -1 -15  103.56    2.47   0
   0   0 -19    3.39    2.10   0
   0   1 -21    2.44    2.28   0
   0   7   9   12.91    2.03   0
   0   9  10   30.19    2.95   0
   0  10  10    4.65    2.02   0
   0  11  10    0.00    2.07   0
   0  12  10   20.91    2.54   0
   0  13  10   -3.80    2.22   0
   1  -2 -16  329.09    3.19   0
   1  -2  -3  774.83    5.64   0
   1  -1 -20   44.89    2.31   0
   1   0 -22    1.39    2.20   0
   1   6  10  355.82    3.13   0
   1   8  11   40.81    2.02   0
   2  -3 -16    3.30    1.91   0
   2  -3 -15    3.61    2.61   0
   2  -3  -4  320.95    3.88   0
   2  -2 -20   25.32    2.32   0
   2  -1 -22    9.11    3.12   0
   2   3   9   81.35    3.01   0
   2   4  10  510.64    3.92   0
   2   7  12    1.76    2.62   0
   2   8  12  122.95    2.45   0
   2  11  13    7.28    2.67   0
   3  -4 -15   16.78    2.13   0
   3  -4 -14    8.04    1.96   0
   3  -4 -13  117.41    3.28   0
   3  -4  -6  241.20    2.88   0
   3  -3 -19  113.04    2.97   0
   3  -3  -1  147.51    3.64   0
   3  -2 -22    2.02    2.97   0
   3   2   9  110.80    3.01   0
   3   3  10  265.37    3.55   0
   3   6  12   15.44    1.98   0
   3   8  13   19.12    2.14   0
   4  -4 -18   56.25    2.33   0
   4  -4 -17   20.42    2.99   0
   4  -3 -21    0.24    3.27   0
   4   5  12   13.86    1.91   0
   4   9  14    4.28    2.93   0
   5  -5 -15   26.77    2.19   0
   5  -5 -14   22.06    2.15   0
   5  -5 -13  187.62    3.04   0
   5  -5  -8   27.96    2.90   0
   5  -5  -7  443.53    3.66   0
   5   1   9   62.36    2.39   0
   5   2  10  347.31    3.56   0
   5   3  11    9.73    2.10   0
   5   4  12   21.10    2.80   0
   5   6  13    2.71    2.01   0
   5   8  14   54.03    2.61   0
   6  -5 -17   25.73    2.34   0
   6  -5 -16   24.19    2.71   0
   6  -5  -5  132.31    2.83   0
   6   0   8   31.63    3.04   0
   6   4  12    6.38    1.95   0
   7  -5  -5   29.37    2.82   0
   7   0   8    1.74    2.78   0
   7   4  12    0.47    2.13   0
   8  -5  -5   83.46    3.40   0
   8   1   9   14.15    2.25   0
   8   3  11   -3.57    2.48   0
   9  -5  -6   45.02    3.04   0
  -4   9  -5   -0.47    3.50   0
  -4  10  -4    3.17    4.21   0
  -4  11  -3    5.44    4.05   0
  -4  12  -4    2.99    3.47   0
  -4  12  -3    1.80    4.53   0
  -4  13  -4   14.43    4.74   0
  -3   5 -13    4.39    3.04   0
  -3   7   1   17.65    2.81   0
  -3   8   2   59.38    3.14   0
  -3  10   3   33.71    3.03   0
  -3  11   3    7.56    2.35   0
  -3  12   3   10.24    2.23   0
  -3  13   3    7.47    3.65   0
  -2   2 -12  442.41    4.11   0
  -2   2 -11  595.77    5.14   0
  -2   2  -5   22.77    2.95   0
  -2   3  -1  173.17    4.72   0
  -2   4 -18   13.98    2.21   0
  -2   6   4   15.46    2.07   0
  -2   7   5  301.41    3.81   0
  -2   9   6  177.97    2.86   0
  -2  14   6    3.92    2.54   0
  -1   0 -10    1.74    1.91   0
  -1   0  -9  185.79    3.03   0
  -1   0  -8    1.80    1.86   0
  -1   0  -7 2099.03    8.39   0
  -1   1 -16   60.44    2.27   0
  -1   5   6  227.91    3.32   0
  -1   6   7  147.80    3.19   0
  -1   8   8  162.93    2.61   0
  -1  10   9   15.12    2.70   0
  -1  11   9   28.96    2.29   0
  -1  12   9    6.35    2.54   0
  -1  13   9   -3.24    3.16   0
   0  -1 -14   67.40    2.26   0
   0  -1 -13  134.98    3.07   0
   0  -1  -4 2958.35   10.88   0
   0   1 -20   28.13    2.65   0
   0   2 -22    9.24    2.29   0
   0   3   6 1683.97    6.67   0
   0   5   8   45.18    2.24   0
   0   6   9  250.88    2.82   0
   0   8  10    1.23    1.79   0
   0  11  11    9.32    2.89   0
   0  12  11    9.67    3.23   0
   1  -2 -15   19.24    2.14   0
   1  -2 -14   39.07    2.95   0
   1  -1 -19   -5.75    2.26   0
   1  -1 -18  362.67    3.77   0
   1   0   3 2326.13   13.37   0
   1   1   5  537.55    5.02   0
   1   4   9  158.37    3.09   0
   1   7  11   23.12    2.01   0
   1   9  12    2.07    2.98   0
   1  10  12   14.88    2.01   0
   1  11  12    4.74    2.31   0
   1  12  12   14.44    2.22   0
   2  -3 -14   38.86    2.06   0
   2  -3 -13  139.45    3.23   0
   2  -3  -5 1311.88    6.02   0
   2  -2 -19   17.50    2.16   0
   2  -1 -21    5.37    2.96   0
   2   0   5   16.93    3.32   0
   2   2   8   25.25    1.85   0
   2   5  11   32.64    2.15   0
   2   9  13    2.04    1.85   0
   2  10  13   18.56    2.30   0
   3  -4 -12   80.32    2.23   0
   3  -4 -11    0.40    2.01   0
   3  -4 -10  131.67    2.44   0
   3  -4  -9   57.45    2.28   0
   3  -4  -8   -2.01    2.04   0
   3  -4  -7    6.45    1.98   0
   3  -3 -18   91.43    2.46   0
   3  -2 -21   48.61    2.28   0
   3   1   8  162.58    3.28   0
   3   4  11  119.43    2.43   0
   3   5  12  231.78    2.88   0
   3   7  13   13.85    2.14   0
   3   9  14   -4.46    2.94   0
   3  10  14    6.90    2.17   0
   4  -4 -16    5.82    2.19   0
   4  -3 -20    4.07    2.61   0
   4   3  11   10.57    2.18   0
   4   4  12   74.26    2.96   0
   4   6  13   31.40    2.17   0
   4   8  14    8.95    2.22   0
   5  -5 -12   92.71    2.37   0
   5  -5 -11   -0.20    1.94   0
   5  -5 -10   55.60    2.25   0
   5  -5  -9  111.62    2.52   0
   5  -4 -19   -1.90    2.26   0
   5  -4 -18    7.13    2.70   0
   5  -4  -2  465.40    4.78   0
   5   0   8    1.90    2.57   0
   5   5  13   63.89    2.34   0
   5   7  14   11.35    2.18   0
   6  -5 -15   12.19    2.20   0
   6  -5 -14   20.03    1.94   0
   6  -5 -13   33.01    2.98   0
   6  -5  -7  317.28    4.02   0
   6  -5  -6  212.14    3.19   0
   6  -4  -1   95.88    3.42   0
   6   5  13   12.54    2.19   0
   7  -5 -16   16.09    2.38   0
   7  -5 -15    5.66    2.21   0
   7  -5 -14    9.99    2.93   0
   7  -5  -6   46.92    2.69   0
   8  -5  -6   -0.60    2.00   0
   8  -4  -1   14.66    2.94   0
   8   0   8    4.24    2.94   0
   9  -5  -8   -3.01    2.96   0
   9  -5  -7   -4.77    2.26   0
   9  -1   6   42.48    5.45   0
  -4  10  -3    4.73    3.87   0
  -4  12  -2   -5.27    4.63   0
  -4  13  -3    2.39    3.38   0
  -4  13  -2    0.59    4.04   0
  -3   5 -12  151.73    4.38   0
  -3   6 -15    4.36    2.38   0
  -3   6   0   28.72    3.10   0
  -3   9   3   79.62    2.76   0
  -3  11   4    6.92    3.21   0
  -3  12   4   28.26    2.45   0
  -3  13   4   -0.45    3.67   0
  -3  14   3    5.80    2.84   0
  -2   2 -10  410.79    4.92   0
  -2   2  -9   15.83    2.88   0
  -2   2  -6   34.95    2.96   0
  -2   3 -15    0.97    1.96   0
  -2   4 -17    3.87    2.64   0
  -2   5 -19    0.20    2.31   0
  -2   5   3  872.15    5.11   0
  -2   8   6  173.09    2.81   0
  -2  10   7    9.88    2.13   0
  -2  11   7    8.72    2.46   0
  -2  12   7   -6.44    2.22   0
  -1   1 -15   -0.10    2.10   0
  -1   2 -18    4.41    2.24   0
  -1   3 -20   28.29    2.59   0
  -1   4 -21   43.18    3.32   0
  -1   4   5  516.06    3.78   0
  -1   7   8  397.81    3.46   0
  -1   9   9    7.66    2.15   0
  -1  12  10   53.68    3.21   0
   0  -1 -12   -0.29    2.10   0
   0  -1 -11  133.79    3.09   0
   0  -1  -5 1067.71    6.16   0
   0   0 -17    0.91    2.11   0
   0   1 -19   49.88    3.10   0
   0   2 -21    4.29    3.14   0
   0   7  10   35.54    2.01   0
   0   9  11   14.43    1.96   0
   0  10  11    4.45    2.22   0
   1  -2 -13  687.84    3.81   0
   1  -2 -12    8.06    2.66   0
   1  -2  -4 3773.30   11.03   0
   1  -1 -17    9.16    2.91   0
   1   0 -20   -1.29    2.57   0
   1   1 -22    2.21    2.75   0
   1   3   8   42.80    2.02   0
   1   5  10  276.93    2.84   0
   1   6  11  122.41    2.32   0
   1  11  13   10.66    2.87   0
   2  -3 -12   28.86    2.00   0
   2  -3 -11 1254.57    5.21   0
   2  -3 -10   72.29    2.84   0
   2  -3  -7  876.83    4.80   0
   2  -3  -6  429.52    3.38   0
   2  -2 -18   82.79    2.46   0
   2  -2 -17   45.74    2.80   0
   2  -1 -20    5.00    2.73   0
   2   1   7   63.62    2.82   0
   2   6  12   84.97    2.37   0
   2   8  13   13.51    1.99   0
   2  10  14    7.77    2.54   0
   3  -3 -17   -2.11    2.11   0
   3  -3 -16   13.76    2.72   0
   3  -2 -20   -0.96    2.12   0
   3  -2   2  187.15    6.51   0
   3   6  13   18.94    1.90   0
   4  -4 -15   79.55    2.18   0
   4  -4 -14  110.64    2.47   0
   4  -4 -13   16.31    2.76   0
   4  -4  -5   18.50    2.98   0
   4  -4  -4  813.33    5.00   0
   4  -3 -19   29.17    2.34   0
   4   1   9  431.88    4.49   0
   4   5  13   -1.65    2.12   0
   5  -4 -17    4.18    2.25   0
   5  -4 -16   79.86    3.04   0
   5  -3 -20    0.55    3.04   0
   5   6  14   29.51    2.48   0
   6  -5 -12    1.17    2.19   0
   6  -5 -11    7.14    1.98   0
   6  -5 -10   35.58    2.07   0
   6  -5  -9   67.40    2.33   0
   6  -5  -8   65.04    2.27   0
   6  -4 -18   10.68    2.17   0
   6   2  11    6.25    2.77   0
   6   3  12    3.58    2.82   0
   6   4  13    5.15    2.68   0
   6   6  14   19.03    2.50   0
   7  -5 -13   -4.28    2.22   0
   7  -5 -12    2.89    2.02   0
   7  -5 -11    1.62    2.44   0
   7  -5 -10   -6.36    2.62   0
   7  -5  -9    9.18    2.77   0
   7  -5  -8    6.31    2.06   0
   7  -5  -7    7.41    2.01   0
   7  -4  -1   16.58    2.55   0
   7   2  11    0.84    2.75   0
   7   3  12    0.57    2.85   0
   8  -5 -13    1.34    2.23   0
   8  -5 -12   -2.30    2.17   0
   8  -5 -11   13.43    2.73   0
   8  -5 -10   -4.91    2.75   0
   8  -5  -9    4.53    2.75   0
   8  -5  -8    7.31    2.11   0
   8  -5  -7    1.43    1.96   0
   8  -3   2   29.14    3.33   0
   9  -5  -9    0.13    2.33   0
   9  -4  -2   24.34    2.47   0
  -4  11  -1    1.15    4.00   0
  -4  13  -1    6.44    4.38   0
  -3   6 -14   -1.55    3.02   0
  -3   7 -16    5.39    2.36   0
  -3   7   2   13.57    2.92   0
  -3   8 -17    1.03    3.32   0
  -3   9   4   62.64    3.49   0
  -3  10   4   25.95    2.44   0
  -3  11   5   38.39    3.19   0
  -3  12   5    5.49    3.09   0
  -3  13   5   20.52    3.19   0
  -2   2  -8   19.20    1.96   0
  -2   2  -7   49.46    2.79   0
  -2   3 -14   62.69    2.39   0
  -2   4 -16   28.90    2.96   0
  -2   4   2 1445.64    7.28   0
  -2   5 -18   93.49    3.72   0
  -2   6   5  488.80    3.87   0
  -2   7   6  128.79    2.55   0
  -2   8   7   21.30    2.70   0
  -2   9   7   -1.78    2.00   0
  -2  10   8    0.72    2.52   0
  -2  11   8   91.80    2.70   0
  -2  12   8   12.58    2.35   0
  -2  13   8   19.86    2.45   0
  -1   1 -14  238.56    3.01   0
  -1   1 -13  128.51    3.19   0
  -1   2 -17   -3.25    1.85   0
  -1   3 -19   43.33    2.40   0
  -1   3   4  184.79    3.50   0
  -1   5   7 1926.05    6.50   0
  -1   6   8  140.38    3.55   0
  -1   8   9   11.60    2.29   0
  -1   9  10   11.75    3.02   0
  -1  10  10   82.23    2.54   0
  -1  11  10   26.26    2.19   0
  -1  13  10    3.50    2.39   0
   0  -1 -10  394.99    3.34   0
   0  -1  -8 2381.26    7.34   0
   0  -1  -7  830.98    4.89   0
   0  -1  -6 1572.36    6.91   0
   0   0 -16   27.58    2.18   0
   0   0 -15    3.23    2.59   0
   0   1 -18    1.81    2.67   0
   0   1   3  162.75    3.61   0
   0   2   5 6921.26   14.03   0
   0   3 -22   15.96    3.13   0
   0   4   8 1153.23    4.85   0
   0   5   9   46.76    2.34   0
   0   6  10   26.51    2.71   0
   0   8  11    4.40    1.95   0
   0  10  12   58.96    2.43   0
   0  11  12    0.29    2.14   0
   0  12  12   12.11    2.32   0
   1  -2 -11  509.51    3.57   0
   1  -2 -10  190.83    2.57   0
   1  -2  -9 1325.57    5.72   0
   1  -2  -7  499.05    4.10   0
   1  -2  -6  657.06    4.32   0
   1  -2  -5  678.30    4.65   0
   1  -1 -16   82.83    2.83   0
   1   0 -19   89.82    2.94   0
   1   1 -21    9.78    3.27   0
   1   2   7 2158.50    7.05   0
   1   7  12  345.53    3.10   0
   1   9  13   16.25    2.11   0
   2  -3  -9   35.06    1.93   0
   2  -3  -8  751.89    4.07   0
   2  -2 -16   74.19    2.36   0
   2  -1 -19  145.34    3.24   0
   2  -1   3   36.84    3.57   0
   2   0 -22   -3.29    2.24   0
   2   3  10   30.89    2.06   0
   2   4  11   66.78    2.24   0
   2   5  12  163.39    3.38   0
   2   7  13   19.87    1.93   0
   2   9  14   24.06    2.30   0
   3  -3 -15    3.64    1.89   0
   3  -3  -2 1301.78    6.57   0
   3  -2 -19   37.38    2.09   0
   3  -1 -22    1.94    2.46   0
   3   3  11   13.44    2.02   0
   3   4  12   10.10    2.02   0
   3   5  13    8.21    2.57   0
   3   7  14   24.41    2.19   0
   3   9  15   84.41    3.31   0
   4  -4 -12   10.19    2.02   0
   4  -4 -11    5.27    1.91   0
   4  -4 -10  369.90    3.80   0
   4  -4  -9    6.99    2.76   0
   4  -4  -8  540.62    4.10   0
   4  -4  -7    2.37    2.79   0
   4  -4  -6   80.36    2.47   0
   4  -3 -18   13.99    1.93   0
   4  -3 -17   -1.07    2.91   0
   4  -2 -21    2.09    2.21   0
   4   6  14   30.76    2.10   0
   4   8  15   19.95    2.24   0
   5  -4 -15   10.47    2.07   0
   5  -4 -14   12.21    2.64   0
   5  -4  -3   12.28    1.90   0
   5  -3 -19    2.03    2.62   0
   5   2  11  108.92    2.55   0
   5   3  12    0.35    1.78   0
   5   4  13   24.77    2.21   0
   5   5  14    1.42    2.56   0
   5   7  15    0.99    2.38   0
   6  -4 -17   24.96    2.30   0
   6  -4 -16   10.43    2.93   0
   6  -4  -2  493.04    4.74   0
   6  -3   2   95.27    3.82   0
   6   1  10    3.11    2.50   0
   6   5  14    0.81    2.20   0
   7   1  10    8.35    2.99   0
   7   4  13   63.78    2.69   0
   8  -4  -2   35.42    3.07   0
   8   2  11   40.54    3.34   0
   9  -4  -3   30.12    3.11   0
   9  -3   1    3.85    3.39   0
  -4   8  -7    0.60    4.26   0
  -4   8  -5    1.65    3.83   0
  -4   9  -2    1.58    3.33   0
  -4  11   0   13.92    4.02   0
  -4  12   0    8.81    3.26   0
  -4  13   0    0.54    3.22   0
  -3   6   1   43.08    3.06   0
  -3   8   4   36.48    2.79   0
  -3  10   5    6.10    2.09   0
  -2   3 -13   92.09    2.99   0
  -2   5   4   85.03    2.42   0
  -2   6 -19    5.54    2.39   0
  -2   9   8   28.03    2.38   0
  -2  11   9   20.31    2.82   0
  -2  12   9   54.13    3.30   0
  -2  13   9    2.53    3.36   0
  -1   1 -12  188.20    3.49   0
  -1   2 -16    0.15    1.89   0
  -1   2   2 3064.38   12.33   0
  -1   3 -18   23.76    2.81   0
  -1   4 -20    7.27    2.41   0
  -1   4   6  478.73    3.57   0
  -1   7   9    6.30    2.06   0
  -1   8  10   15.33    2.58   0
  -1  10  11    8.36    2.70   0
  -1  12  11    9.86    2.35   0
   0   0 -14  152.94    3.26   0
   0   2 -20   83.01    2.73   0
   0   3   7   96.38    2.10   0
   0   7  11   -1.22    1.98   0
   0   8  12   -0.32    2.52   0
   0   9  12   58.00    2.31   0
   0  11  13   -1.45    2.75   0
   0  12  13   21.86    3.30   0
   1  -2  -8   90.85    2.12   0
   1  -1 -15   56.74    2.18   0
   1   0 -18    2.10    2.54   0
   1   2 -22    2.54    3.10   0
   1   3   9   -0.44    2.46   0
   1   4  10    0.83    2.14   0
   1   5  11  575.96    3.63   0
   1   6  12   73.21    2.35   0
   1   8  13   -2.17    2.03   0
   1  10  14    0.05    2.34   0
   1  11  14   -2.00    2.27   0
   2  -2 -15   22.52    2.06   0
   2  -1 -18    5.72    2.69   0
   2   0 -21   -0.71    2.23   0
   2   2   9   22.03    1.96   0
   2   6  13   43.24    2.29   0
   2   8  14    8.81    2.03   0
   2  10  15   -1.90    2.08   0
   3  -3 -14   29.14    2.20   0
   3  -3 -13   18.35    1.93   0
   3  -2 -18   18.31    2.06   0
   3  -1 -21   -0.57    2.08   0
   3   0   7 1175.52    6.81   0
   3   2  10   59.44    2.33   0
   3   6  14   -5.16    2.13   0
   3   8  15   17.61    2.26   0
   4  -3 -16   12.76    2.44   0
   4  -3   0  567.34    5.34   0
   4  -1   6  192.45    4.33   0
   4   0   8  120.23    3.49   0
   4   2  11  352.77    4.12   0
   4   3  12   10.93    2.04   0
   4   4  13   30.52    1.88   0
   4   5  14    8.59    2.90   0
   4   7  15    2.90    2.24   0
   5  -4 -13   -5.16    2.03   0
   5  -4 -12   17.02    2.66   0
   5  -4  -4   85.92    2.32   0
   5  -3 -18   35.70    2.23   0
   5   1  10   22.64    2.13   0
   5   6  15    4.49    2.84   0
   6  -4 -15    1.50    1.97   0
   6  -4 -14   66.68    2.91   0
   6  -4  -3  310.57    4.00   0
   6  -3 -19   36.89    2.38   0
   6  -1   7   32.92    3.14   0
   7  -4 -16   21.46    2.23   0
   7  -4 -15   67.27    3.14   0
   7  -4  -2   73.48    2.49   0
   7  -3   2   70.45    3.55   0
   7  -1   7    1.81    2.61   0
   8  -4  -3    6.03    2.90   0
   8   1  10    1.72    3.00   0
   9  -4  -4    7.05    3.06   0
   9   0   8    0.55    3.43   0
  -4   8  -4    3.23    3.17   0
  -4   9  -1   17.98    3.27   0
  -4  10   0    8.03    2.52   0
  -4  11   1    0.71    3.86   0
  -4  12   1   36.30    3.32   0
  -4  13   1    9.23    3.17   0
  -3   5  -1   23.08    2.78   0
  -3   6 -13    9.26    2.74   0
  -3   7 -15    3.78    2.80   0
  -3   8 -16    2.50    3.33   0
  -3   9   5    5.41    2.13   0
  -3  10   6    9.84    2.85   0
  -3  11   6    1.24    2.34   0
  -3  12   6   -1.45    2.28   0
  -3  13   6   -0.29    2.30   0
  -2   3 -12   87.94    3.19   0
  -2   3   0  140.58    3.94   0
  -2   4 -15   15.97    2.57   0
  -2   5 -17   26.00    2.28   0
  -2   6   6    0.17    1.94   0
  -2   7   7   11.27    2.31   0
  -2   8   8    6.84    2.02   0
  -2  10   9   21.53    2.11   0
  -1   1 -11  782.55    5.13   0
  -1   2 -15   10.31    2.12   0
  -1   4 -19   35.37    3.22   0
  -1   5   8  238.02    3.28   0
  -1   6   9  105.94    3.05   0
  -1   7  10   24.51    2.44   0
  -1   9  11    1.40    1.92   0
   0   0 -13    0.26    2.76   0
   0   1 -17    7.33    1.95   0
   0   2 -19  108.04    2.67   0
   0   3 -21    7.21    2.13   0
   0   4   9   20.45    2.46   0
   0   5  10  321.20    3.05   0
   0   6  11   17.99    2.01   0
   0   9  13   -4.55    2.87   0
   0  10  13   48.77    2.29   0
   1  -1 -14    1.70    1.95   0
   1   0 -17    5.27    2.76   0
   1   1 -20   51.88    2.31   0
   1   1   6 1279.73    6.37   0
   1   7  13  121.84    2.44   0
   1   9  14    0.73    2.03   0
   2  -2 -14  132.87    2.37   0
   2  -2 -13   13.54    2.66   0
   2  -1 -17   -1.55    2.73   0
   2   0 -20    7.37    1.98   0
   2   1 -22    5.06    2.23   0
   2   4  12   30.10    2.69   0
   2   5  13    3.44    2.48   0
   2   7  14   13.88    2.18   0
   2   8  15    1.46    2.51   0
   2   9  15    6.10    2.24   0
   3  -3 -12    6.52    2.07   0
   3  -3 -11  210.23    2.70   0
   3  -3  -3 1110.36    5.65   0
   3  -2 -17   10.85    1.96   0
   3  -1 -20   11.89    2.22   0
   3  -1   5  471.09    6.23   0
   3   0 -22   -4.76    2.35   0
   3   1   9 1640.15    7.54   0
   3   7  15    0.66    1.98   0
   4  -3 -15    8.75    2.08   0
   4  -2 -19    4.95    2.22   0
   4  -1 -21    6.45    2.80   0
   4   6  15   26.50    2.43   0
   5  -4 -11  303.34    3.14   0
   5  -4 -10  202.54    2.84   0
   5  -4  -9  448.96    3.78   0
   5  -4  -8   50.91    2.93   0
   5  -4  -7  120.69    3.07   0
   5  -4  -6    9.84    1.89   0
   5  -4  -5  142.03    2.53   0
   5  -3 -17    2.36    1.90   0
   5  -3   1   62.08    3.49   0
   5  -2 -20    7.58    2.42   0
   5   3  13   15.05    2.71   0
   5   4  14    0.53    2.40   0
   6  -4 -13   73.67    2.46   0
   6  -4 -12   19.10    2.76   0
   6  -4  -4   26.10    2.75   0
   6  -3 -18   24.61    2.27   0
   6   0   9    1.22    2.77   0
   6   2  12   29.44    2.86   0
   6   4  14   35.75    3.15   0
   6   5  15    6.55    2.81   0
   7  -4 -14    9.20    2.18   0
   7  -4 -13   18.92    2.83   0
   7  -4  -3   60.76    2.28   0
   7   0   9   -2.62    2.92   0
   7   3  13    6.21    2.94   0
   8  -4 -14   -0.93    2.26   0
   8  -4 -13    2.01    2.87   0
   8  -4  -4   11.40    2.94   0
   9  -4  -6   -0.67    2.76   0
   9  -4  -5   -1.79    2.18   0
  10  -3  -1    1.05    3.31   0
  -4   8  -2    2.11    3.06   0
  -4   9   0    3.27    3.24   0
  -4  10   1    9.04    2.39   0
  -4  12   2   -2.98    2.83   0
  -4  13   2    2.31    3.04   0
  -4  13   3   -3.75    3.59   0
  -3   5 -10  276.05    5.14   0
  -3   6   2   11.17    2.05   0
  -3   9   6    2.82    2.05   0
  -3  10   7    0.43    2.48   0
  -3  11   7   29.24    2.44   0
  -3  12   7   10.49    2.53   0
  -3  13   7   20.32    2.61   0
  -2   4   3  782.08    5.01   0
  -2   5 -16   13.82    2.95   0
  -2   5   5  288.56    3.05   0
  -2   6 -18    3.39    2.20   0
  -2   7   8   65.25    2.84   0
  -2   9   9   10.43    1.99   0
  -2  10  10   15.42    3.06   0
  -2  11  10    0.64    2.03   0
  -2  12  10    0.41    2.37   0
  -2  13  10   -0.11    2.45   0
  -1   1 -10    4.32    2.61   0
  -1   2 -14  656.26    4.66   0
  -1   3 -17   39.89    2.21   0
  -1   3   5  238.87    3.00   0
  -1   5 -20    9.73    2.34   0
  -1   8  11   13.88    1.94   0
  -1  10  12   30.51    2.24   0
  -1  11  12   17.43    2.23   0
   0   0 -12 1438.55    5.85   0
   0   1 -16    6.24    2.02   0
   0   2 -18   23.69    2.66   0
   0   2   6  568.25    4.17   0
   0   3 -20   -1.17    2.25   0
   0   3   8 1266.09    5.35   0
   0   7  12    2.74    1.87   0
   0   8  13   17.35    1.95   0
   0  10  14   -0.28    2.91   0
   0  11  14    6.54    2.22   0
   1  -1 -13    0.39    1.95   0
   1  -1   0 1932.76   15.94   0
   1   0 -16    0.31    2.78   0
   1   1 -19    2.07    2.19   0
   1   2 -21   29.15    2.48   0
   1   2   8 2537.02    7.38   0
   1   3 -22   37.39    3.39   0
   1   4  11  733.28    3.95   0
   1   5  12   -3.21    1.92   0
   1   6  13   34.16    2.32   0
   1   8  14   17.83    2.20   0
   1   9  15   63.13    2.84   0
   1  10  15   -0.14    2.11   0
   2  -2 -12  730.21    3.87   0
   2  -1 -16   91.68    3.13   0
   2   0 -19    3.29    2.02   0
   2   0   6  360.25    4.41   0
   2   1 -21   -2.64    2.81   0
   2   1   8  147.25    2.71   0
   2   3  11  318.54    2.96   0
   2   6  14  176.70    2.66   0
   2   7  15    4.77    2.60   0
   2   9  16   56.63    2.82   0
   3  -3  -9  131.55    2.40   0
   3  -3  -8  799.54    4.17   0
   3  -3  -7  735.71    4.47   0
   3  -3  -6  152.72    3.42   0
   3  -3  -5   67.06    2.06   0
   3  -2 -16   15.60    2.12   0
   3  -2 -15   -5.41    2.61   0
   3  -1 -19   12.57    2.03   0
   3   0 -21   58.31    2.50   0
   3   3  12    6.98    1.98   0
   3   4  13   52.58    2.16   0
   3   5  14    7.16    1.81   0
   3   6  15    5.12    2.04   0
   3   8  16   -5.25    2.30   0
   4  -3 -14  240.43    2.71   0
   4  -3 -13  453.49    3.40   0
   4  -3  -1   17.30    2.46   0
   4  -2 -18    0.11    2.07   0
   4  -2 -17    5.82    2.90   0
   4  -1 -20   19.61    3.08   0
   4   1  10   88.43    2.58   0
   4   4  14  142.93    3.22   0
   4   7  16   23.90    2.31   0
   5  -3 -16   25.05    2.00   0
   5  -3 -15  174.54    3.22   0
   5  -2 -19   10.82    2.33   0
   5  -1   7   68.30    3.19   0
   5   0   9   40.14    2.92   0
   5   2  12   61.75    2.28   0
   5   5  15   14.47    2.22   0
   5   6  16    0.18    2.83   0
   6  -4 -11   37.43    1.99   0
   6  -4 -10   13.15    2.12   0
   6  -4  -9   17.88    2.56   0
   6  -4  -8    6.55    2.94   0
   6  -4  -7   43.25    3.06   0
   6  -4  -6  204.42    3.69   0
   6  -4  -5   29.07    2.07   0
   6  -3 -17   30.54    2.44   0
   6  -3 -16   12.15    2.82   0
   7  -4 -12   42.35    2.30   0
   7  -4 -11    2.69    2.04   0
   7  -4 -10   41.63    3.19   0
   7  -4  -5   -1.43    2.85   0
   7  -4  -4   13.11    2.03   0
   7  -3 -17    0.31    2.12   0
   7   2  12    1.19    2.21   0
   8  -4 -12    1.61    2.14   0
   8  -4 -11   27.64    2.31   0
   8  -4 -10   68.70    2.95   0
   8  -4  -9   23.05    2.72   0
   8  -4  -8   12.88    2.68   0
   8  -4  -7   -1.44    2.83   0
   8  -4  -6    1.95    2.84   0
   8  -4  -5    1.61    2.20   0
   8  -3   1    9.16    3.00   0
   8  -1   7   11.66    3.73   0
   9  -4 -10   23.25    2.30   0
   9  -4  -9    4.78    2.17   0
   9  -4  -8    1.71    2.09   0
   9  -4  -7    1.83    2.09   0
   9  -3   0    2.38    2.98   0
  10  -3  -2   13.05    3.43   0
  -4   8  -1    2.89    3.21   0
  -4   9   1    4.71    2.12   0
  -4  10   2    5.75    2.30   0
  -4  11   3   -0.53    2.49   0
  -4  12   3    4.04    2.88   0
  -4  12   4    1.91    3.39   0
  -4  13   4   19.82    3.79   0
  -3   6   3  370.67    4.31   0
  -3   7 -14   17.73    3.21   0
  -3   8   6   41.45    2.89   0
  -3   9   7   95.31    3.07   0
  -3  11   8   -2.95    3.11   0
  -3  12   8   -2.33    2.44   0
  -3  13   8    6.90    2.47   0
  -2   4 -14  165.70    2.92   0
  -2   5   6  127.25    2.96   0
  -2   6 -17   31.00    3.21   0
  -2   6   7   46.63    2.43   0
  -2   8   9   30.97    2.20   0
  -2   9  10   92.08    2.43   0
  -2  11  11   10.43    2.27   0
  -2  12  11   34.20    2.38   0
  -1   1  -9  981.36    5.94   0
  -1   2   3  700.70    5.37   0
  -1   3 -16   13.29    2.07   0
  -1   4 -18   23.19    2.35   0
  -1   5   9   -1.21    2.81   0
  -1   6  10   76.82    2.19   0
  -1   7  11   29.97    2.14   0
  -1   8  12  293.25    3.37   0
  -1   9  12   23.03    2.12   0
  -1  10  13   21.05    2.54   0
  -1  11  13    5.67    2.34   0
  -1  12  13    1.73    2.34   0
   0   0 -11    0.37    1.91   0
   0   1 -15   92.85    2.29   0
   0   1   4 2939.23   10.81   0
   0   2 -17   -2.49    2.72   0
   0   3 -19   72.13    3.02   0
   0   4 -21   35.56    2.31   0
   0   5  11   22.89    2.10   0
   0   6  12    2.06    1.82   0
   0   7  13   -1.27    2.50   0
   0   9  14   56.36    2.11   0
   0  11  15    1.76    2.75   0
   1  -1 -12   15.60    2.21   0
   1  -1 -11   11.04    2.61   0
   1   0 -15  118.78    2.96   0
   1   0   4    0.01    2.57   0
   1   1 -18  363.63    3.28   0
   1   2 -20  111.31    2.55   0
   1   3  10   -2.39    1.86   0
   1   7  14   28.19    2.09   0
   1   8  15   -5.55    2.56   0
   2  -2 -11  749.58    4.16   0
   2  -2 -10  531.32    3.88   0
   2  -1 -15   95.18    2.92   0
   2   0 -18    8.27    2.41   0
   2   1 -20    1.34    2.72   0
   2   2 -22   19.83    2.15   0
   2   2  10  491.63    3.89   0
   2   8  16    5.64    2.92   0
   3  -2 -14   26.27    2.20   0
   3  -1 -18   28.08    2.26   0
   3   0 -20    0.31    2.33   0
   3   1 -22    1.42    2.31   0
   3   2  11   83.60    2.32   0
   3   7  16    3.88    2.32   0
   4  -3 -12   23.36    2.04   0
   4  -3 -11  224.50    3.28   0
   4  -2 -16    7.19    2.57   0
   4   2  12  212.25    3.55   0
   4   3  13   27.85    1.93   0
   4   5  15    3.96    1.90   0
   4   6  16   -2.37    2.13   0
   5  -3 -14    1.66    1.90   0
   5  -2 -18   82.53    2.59   0
   5   1  11   16.98    2.73   0
   6  -3 -15    2.17    2.10   0
   6  -3   1    1.08    2.70   0
   6  -2 -19    2.42    2.13   0
   6   1  11   55.70    2.36   0
   7  -4  -9    7.01    1.92   0
   7  -4  -8   28.43    2.15   0
   7  -4  -7  145.09    2.69   0
   7  -4  -6   40.30    2.30   0
   7  -3 -16    4.48    2.16   0
   7  -3 -15    1.56    3.13   0
   7   1  11   17.61    2.87   0
   8  -3 -15   22.71    3.28   0
   8   0   9    0.52    2.98   0
  10  -3  -3    7.58    3.35   0
  -4   9   2    6.17    2.11   0
  -4  10 -11   10.69    5.52   0
  -4  10   3    2.95    2.24   0
  -4  11   4   22.16    2.69   0
  -4  12   5    4.35    3.19   0
  -4  13   5   -0.88    3.74   0
  -3   5  -9   45.44    3.45   0
  -3   6 -12    8.03    2.66   0
  -3   8 -15    8.50    2.91   0
  -3  10   8   19.12    2.09   0
  -3  11   9   40.73    3.14   0
  -3  12   9    7.54    2.46   0
  -3  13   9    7.60    2.73   0
  -2   3 -10   31.91    2.82   0
  -2   3   1  988.61    6.99   0
  -2   4 -13   15.06    3.02   0
  -2   5 -15   49.94    2.74   0
  -2   6   8  325.30    3.68   0
  -2   7 -18   47.65    2.69   0
  -2   7   9  153.44    2.55   0
  -2   8  10    3.54    1.93   0
  -2   9  11   25.23    2.42   0
  -2  10  11   77.20    2.45   0
  -2  12  12    3.30    3.07   0
  -1   1  -8  289.29    3.35   0
  -1   2 -13  667.01    4.27   0
  -1   3 -15  110.03    3.22   0
  -1   3   6  158.50    2.46   0
  -1   4 -17   30.57    3.17   0
  -1   4   8  111.91    3.01   0
  -1   5 -19    3.47    2.24   0
  -1   6 -20   -2.39    2.57   0
  -1   9  13    1.19    2.07   0
  -1  11  14   -0.15    2.99   0
   0   0 -10 1482.33    5.74   0
   0   1 -14   70.62    2.29   0
   0   4 -20    7.11    2.81   0
   0   4  10   66.16    2.26   0
   0   8  14   85.36    2.46   0
   0  10  15    4.58    2.17   0
   1  -1 -10   76.30    2.04   0
   1   1 -17    8.92    2.85   0
   1   1   7  224.67    3.36   0
   1   2 -19    7.08    2.75   0
   1   2   9  872.79    4.47   0
   1   3 -21   22.27    2.26   0
   1   4  12   16.88    2.13   0
   1   5  13  136.30    2.54   0
   1   6  14   24.21    2.05   0
   1   7  15   14.68    2.82   0
   1   9  16   -5.95    2.11   0
   2  -2  -9  744.32    3.96   0
   2  -2  -8  145.00    2.94   0
   2  -2  -2 2192.01    9.16   0
   2  -1 -14   64.24    2.63   0
   2   0 -17    6.82    2.77   0
   2   2 -21   -1.42    2.91   0
   2   3  12   93.58    2.40   0
   2   4  13   15.16    2.08   0
   2   5  14   18.60    2.04   0
   2   6  15    9.45    2.02   0
   2   7  16   50.02    2.89   0
   3  -2 -13  131.86    2.41   0
   3  -1 -17   13.88    1.86   0
   3   0   8    1.18    2.78   0
   3   1 -21    3.59    2.60   0
   3   1  10  225.34    3.49   0
   3   3  13    9.02    2.70   0
   3   4  14   26.88    1.91   0
   3   5  15    9.47    2.03   0
   3   6  16   13.73    2.67   0
   3   8  17    6.15    2.37   0
   4  -3 -10  140.32    2.56   0
   4  -3  -9  144.86    2.98   0
   4  -3  -2  619.90    4.69   0
   4  -2 -15   13.59    2.49   0
   4  -1 -18   28.28    2.77   0
   4   0 -21   10.52    2.17   0
   4   0   9    1.52    2.50   0
   5  -3 -13  141.07    2.41   0
   5  -3 -12  135.86    2.92   0
   5  -3   0  299.86    4.71   0
   5  -2 -17    0.33    2.06   0
   5  -1 -20   42.92    2.39   0
   5   3  14   42.61    3.06   0
   5   4  15    4.14    2.06   0
   5   5  16   39.58    2.32   0
   6  -3 -14   -2.19    2.09   0
   6  -3 -13    8.53    2.60   0
   6  -2 -18    3.45    2.09   0
   6   2  13   29.39    2.57   0
   6   3  14   14.00    2.30   0
   6   4  15    3.93    2.13   0
   7  -3 -14   16.90    2.16   0
   7  -3   1    0.47    2.66   0
   7   3  14   -0.23    3.07   0
   8  -3 -14    1.96    2.12   0
   8  -3   0   10.20    2.87   0
   8   1  11    1.06    2.58   0
   9  -3  -1   16.39    2.81   0
  10  -3  -4    0.61    3.38   0
  -4  10   4    1.15    2.17   0
  -4  11   5   22.01    2.63   0
  -4  12   6   -6.33    3.70   0
  -4  13   6    9.58    3.83   0
  -3   6   4   56.69    2.46   0
  -3   7   6  146.40    2.66   0
  -3   8   7   -2.13    2.29   0
  -3   9   8    5.62    2.12   0
  -3  10   9   -0.33    2.39   0
  -3  12  10   17.80    2.35   0
  -2   5   7 1494.17    5.75   0
  -2   6 -16    1.09    2.91   0
  -2   7  10    2.98    2.47   0
  -2   8  11   36.92    2.54   0
  -2  10  12   15.49    1.98   0
  -2  11  12    3.37    2.31   0
  -1   1  -7  216.98    3.23   0
  -1   2 -12  410.29    3.56   0
  -1   5 -18    3.02    2.76   0
  -1   5  10  767.39    4.10   0
  -1   6  11    4.58    1.97   0
  -1   7  12   12.53    2.00   0
  -1   8  13   32.84    1.95   0
  -1  10  14    6.14    2.16   0
   0   0  -9   -5.09    1.80   0
   0   1 -13  139.34    2.95   0
   0   2 -16    5.85    1.95   0
   0   2   7 1190.60    5.48   0
   0   3 -18  102.71    2.59   0
   0   3   9  102.19    2.09   0
   0   4  11   97.39    2.77   0
   0   5 -21    3.42    2.28   0
   0   5  12  179.57    2.61   0
   0   6  13   -2.47    1.81   0
   0   7  14  161.73    2.47   0
   0   8  15    0.53    2.65   0
   0   9  15    5.30    2.19   0
   0  10  16    7.52    2.66   0
   1  -1  -9 3624.08    8.29   0
   1   0 -14   -1.09    2.00   0
   1   3 -20   14.04    2.98   0
   1   3  11    6.85    1.86   0
   1   8  16    2.44    2.18   0
   2  -2  -7  725.69    4.00   0
   2  -2  -6  290.96    3.00   0
   2  -2  -5 1366.55    6.02   0
   2  -2  -4  521.26    4.32   0
   2  -2  -3 3593.43   10.81   0
   2  -1 -13   43.76    2.08   0
   2   0 -16  493.20    4.07   0
   2   1 -19  141.52    2.62   0
   2   1   9  213.58    2.90   0
   2   2  11  740.49    4.56   0
   2   3 -22    3.69    2.34   0
   3  -2 -12  666.10    3.77   0
   3  -1 -16    1.91    1.92   0
   3   0 -18   -4.37    2.93   0
   3   2 -22    4.76    2.34   0
   3   2  12    6.80    2.55   0
   3   7  17  105.92    2.65   0
   4  -3  -8   22.27    2.03   0
   4  -3  -7   35.10    2.13   0
   4  -3  -6  149.78    3.15   0
   4  -3  -5  283.51    3.71   0
   4  -3  -4 1830.44    6.82   0
   4  -3  -3  264.46    3.21   0
   4  -2 -14   39.10    1.98   0
   4   0 -20   45.25    2.48   0
   4   1  11   62.75    2.25   0
   4   3  14    1.23    1.88   0
   4   4  15    3.75    1.97   0
   4   5  16   50.78    2.36   0
   4   6  17    2.71    2.13   0
   5  -3 -11  119.24    2.45   0
   5  -3 -10   23.97    2.76   0
   5  -2 -15    4.37    2.52   0
   5  -1 -19    6.24    2.25   0
   5   2  13  305.88    3.53   0
   6  -3 -12   40.04    2.04   0
   6  -2 -17    2.63    2.07   0
   6  -2 -16    8.41    2.56   0
   6  -1 -19   32.39    3.10   0
   6   0  10    4.52    2.29   0
   7  -3 -13   28.55    2.01   0
   7  -3 -12    4.97    2.87   0
   7  -2 -17   17.61    2.25   0
   8  -3 -13    4.76    2.19   0
   8  -3 -12    2.17    2.69   0
   9  -3 -11    1.84    2.65   0
   9  -3  -2   24.63    2.84   0
  -4   7  -2    3.04    2.87   0
  -4   8   2   10.20    1.97   0
  -4  10   5    7.01    2.18   0
  -4  11   6   39.24    2.47   0
  -4  12   7   -1.08    3.51   0
  -4  13   7    0.45    2.93   0
  -3   5   2   13.17    1.83   0
  -3   6 -11   -0.57    2.88   0
  -3   6   5    3.03    2.06   0
  -3   7 -13    8.17    2.74   0
  -3   7   7   12.75    2.74   0
  -3   8 -14   14.57    3.02   0
  -3   8   8  136.99    2.63   0
  -3   9 -15   44.74    3.74   0
  -3   9   9   54.65    2.28   0
  -3  10  10   20.41    2.23   0
  -3  11  10   20.11    2.30   0
  -3  12  11    5.53    3.21   0
  -2   4 -12   23.67    2.64   0
  -2   5 -14   17.34    2.91   0
  -2   6   9  194.30    2.66   0
  -2   7 -17   12.94    2.90   0
  -2   9  12   17.21    2.27   0
  -2  10  13   59.41    3.17   0
  -2  11  13   -1.23    2.18   0
  -1   1  -6 1188.42    7.07   0
  -1   1  -5  526.17    5.65   0
  -1   2 -11  180.70    3.63   0
  -1   2   4 3390.67   10.43   0
  -1   3 -14   16.01    2.70   0
  -1   3   7 1125.09    4.94   0
  -1   4 -16    0.32    2.40   0
  -1   4   9 1455.11    5.41   0
  -1   6 -19    1.62    2.12   0
  -1   6  12  226.51    3.19   0
  -1   7  13   84.81    2.76   0
  -1   9  14   21.90    1.91   0
  -1  10  15    2.48    2.93   0
  -1  11  15   17.44    2.38   0
   0   0  -8  364.29    3.38   0
   0   1   5 1098.85    6.39   0
   0   2 -15   17.99    2.93   0
   0   3 -17   56.82    2.74   0
   0   5 -20   10.57    2.95   0
   0   9  16   -0.72    2.28   0
   1  -1  -8 1432.42    5.43   0
   1  -1  -7  765.83    4.39   0
   1  -1  -1  567.65    6.87   0
   1   0 -13  116.53    2.33   0
   1   1 -16   75.30    2.24   0
   1   2 -18    7.30    2.11   0
   1   2  10   15.74    2.34   0
   1   4 -21   44.67    2.39   0
   1   4  13  450.91    3.28   0
   1   5  14  348.36    3.12   0
   1   6  15    2.18    1.84   0
   1   7  16   19.00    1.88   0
   1   9  17   14.52    2.16   0
   2  -1 -12   95.32    2.41   0
   2   0   7   98.72    2.37   0
   2   1 -18    1.97    1.88   0
   2   2 -20   22.97    2.25   0
   2   3  13   98.17    2.99   0
   2   4  14  185.04    2.59   0
   2   5  15   54.11    1.96   0
   2   6  16    3.49    2.01   0
   2   7  17   19.11    2.35   0
   3  -2 -10   -0.62    2.85   0
   3  -1 -15   26.18    1.97   0
   3   1 -20   13.47    2.29   0
   3   3  14  111.04    2.65   0
   3   4  15  111.74    2.40   0
   3   5  16    8.51    2.01   0
   3   6  17    0.89    2.11   0
   4  -2 -13  272.17    2.92   0
   4  -1 -16   34.90    2.62   0
   4  -1   7  520.11    6.00   0
   4   1 -21   15.48    2.27   0
   4   2  13   14.67    1.84   0
   5  -3  -9    0.74    1.99   0
   5  -3  -8  279.17    3.43   0
   5  -2 -14   36.18    2.68   0
   5  -1 -18   49.13    2.19   0
   5   0 -20    2.65    2.18   0
   5   0  10   -1.06    2.84   0
   5   1  12   66.17    2.72   0
   5   4  16   12.16    2.93   0
   6  -3 -11  126.49    2.53   0
   6  -3 -10    4.45    2.52   0
   6  -3   0  115.72    2.93   0
   6  -2 -15    2.12    2.51   0
   6  -1 -18    2.55    2.96   0
   6   1  12   14.33    2.97   0
   6   3  15   15.03    2.54   0
   7  -3 -11   27.05    2.14   0
   7  -3   0  249.98    4.24   0
   7  -2 -16   -3.25    2.14   0
   7   0  10   -1.33    3.01   0
   7   1  12   18.22    2.75   0
   8  -3 -11   20.12    2.25   0
   8  -3 -10    6.68    2.43   0
   8  -3  -1    1.42    2.44   0
   8  -2 -15    3.77    2.99   0
   8  -2   4    6.97    3.84   0
   9  -3 -10   -2.95    2.08   0
   9  -3  -9    4.31    2.09   0
   9  -3  -8   27.92    2.74   0
   9  -3  -7   11.30    3.15   0
   9  -3  -6   38.19    3.04   0
   9  -3  -5   -1.64    2.91   0
   9  -3  -4   49.25    3.25   0
   9  -3  -3    8.53    2.22   0
   9  -2   3   22.84    3.31   0
  10  -2   1    2.58    3.21   0
  -4   7  -1   16.55    2.23   0
  -4   8   4    0.62    2.78   0
  -4   9   5    3.00    2.08   0
  -4  10   6   41.16    2.59   0
  -4  11   7    1.21    2.26   0
  -4  12   8    8.43    3.37   0
  -3   5  -8   -0.88    2.95   0
  -3   6   6   44.51    2.86   0
  -3   8   9   66.37    2.33   0
  -3   9  10   23.13    1.98   0
  -3  10  11    4.82    2.98   0
  -3  11  11    4.83    2.30   0
  -3  12  12    5.51    3.02   0
  -2   3  -8   90.51    3.07   0
  -2   3   3 1291.02    6.88   0
  -2   4   6   83.88    2.27   0
  -2   5   8   19.26    1.95   0
  -2   6  10    1.26    2.60   0
  -2   7  11    1.85    1.93   0
  -2   8  12    9.55    1.95   0
  -2   9  13    1.66    2.16   0
  -2  11  14    0.39    2.26   0
  -1   1  -4 1838.51   11.29   0
  -1   5 -17   18.49    2.66   0
  -1   8  14   42.75    2.28   0
  -1   9  15   84.63    2.60   0
   0   0  -7   -0.02    1.75   0
   0   0  -6 1215.46    6.41   0
   0   1 -12    0.37    2.11   0
   0   3  10   15.66    1.86   0
   0   4 -18   56.56    3.01   0
   0   4  12   18.55    2.73   0
   0   5  13    5.05    1.89   0
   0   6  14    9.33    1.87   0
   0   7  15   64.34    2.34   0
   0   8  16    1.88    2.03   0
   1  -1  -6  207.98    2.92   0
   1  -1  -5 2440.94    8.59   0
   1   0 -12    0.58    2.18   0
   1   0   5  113.35    3.23   0
   1   1 -15   54.60    2.07   0
   1   1   8  279.53    3.00   0
   1   2 -17    9.08    2.45   0
   1   3 -19   69.85    2.47   0
   1   3  12   45.51    2.04   0
   1   8  17    1.57    2.17   0
   2  -1 -11  135.08    2.40   0
   2   0 -15    0.82    2.09   0
   2   1 -17    6.72    2.39   0
   2   2 -19   19.11    2.61   0
   2   3 -21   -3.17    2.02   0
   2   5  16   17.74    2.60   0
   2   6  17   41.76    2.66   0
   3  -2  -9   77.41    2.15   0
   3  -2   1  161.43    5.15   0
   3  -1 -14   25.02    1.94   0
   3  -1   6   59.20    2.98   0
   3   0 -17  204.03    2.55   0
   3   1 -19    8.46    2.04   0
   3   1  11  202.13    2.83   0
   3   2 -21   38.32    2.26   0
   3   7  18   -0.94    2.43   0
   4  -2 -12  428.67    3.24   0
   4  -1 -15   49.61    2.63   0
   4   1 -20   22.84    2.18   0
   4   3  15    2.52    2.80   0
   4   4  16   15.67    1.96   0
   4   5  17   31.32    2.14   0
   5  -3  -7   53.06    2.02   0
   5  -3  -6  284.50    2.98   0
   5  -3  -5   78.73    2.93   0
   5  -3  -4  441.46    4.22   0
   5  -3  -3  845.79    5.73   0
   5  -3  -2   38.98    2.44   0
   5  -2 -13  218.83    3.09   0
   5  -1 -17   15.94    2.09   0
   5   0 -19   10.72    2.23   0
   5   2  14  144.22    3.26   0
   5   3  15   58.57    2.36   0
   6  -3  -9   90.39    2.37   0
   6  -3  -8  213.00    3.45   0
   6  -3  -1   89.77    3.27   0
   6  -2 -14   -0.95    2.14   0
   6  -1   8   17.54    2.80   0
   6   2  14    3.90    2.96   0
   7  -3 -10   42.69    2.16   0
   7  -3  -9   13.49    2.03   0
   7  -3  -8  179.87    3.26   0
   7  -3  -1   37.84    3.02   0
   7  -2 -15   -4.72    2.19   0
   7  -2 -14   11.97    2.66   0
   7  -1 -18   40.29    2.55   0
   8  -3  -9   10.68    2.07   0
   8  -3  -8    9.57    2.13   0
   8  -3  -7   31.59    2.95   0
   8  -3  -6    4.36    2.85   0
   8  -3  -3   21.68    2.94   0
   8  -3  -2   10.30    1.98   0
   8  -2 -14   13.86    2.48   0
  -5  12  -4    1.88    3.82   0
  -5  12  -2    4.40    3.70   0
  -5  12   0    2.80    3.80   0
  -5  12   1   -4.83    5.14   0
  -4  10   7   35.20    2.48   0
  -4  10   8   17.82    2.83   0
  -4  11   8   37.91    2.57   0
  -3   5   4  231.88    3.03   0
  -3   6   7   -1.30    2.56   0
  -3   8  10   49.36    2.67   0
  -3   9  11    0.18    2.73   0
  -3  11  12    5.21    2.23   0
  -2   4 -11   61.47    2.98   0
  -2   4   7  295.62    3.42   0
  -2   5 -13    4.13    2.70   0
  -2   5   9   27.24    2.13   0
  -2   6 -15    5.81    2.06   0
  -2   7 -16   49.23    3.08   0
  -2   7  12   77.70    2.83   0
  -2   8 -17   -0.34    3.09   0
  -2   8  13  124.43    2.98   0
  -2   9  14    8.52    2.35   0
  -1   1  -3    8.08    1.98   0
  -1   2   5  592.71    4.39   0
  -1   3 -13  137.84    2.72   0
  -1   3   8  173.81    2.38   0
  -1   4 -15   32.69    2.04   0
  -1   4  10   11.01    2.12   0
  -1   5  12  104.44    3.05   0
  -1   6 -18    3.26    2.20   0
  -1   6  13  110.79    2.35   0
  -1   7 -19    3.67    2.17   0
  -1   7  14   19.31    1.91   0
  -1   8  15    3.13    2.13   0
  -1   9  16    0.91    2.69   0
  -1  10  16   -1.85    2.27   0
   0   0  -5    3.70    2.75   0
   0   1 -11  135.20    2.51   0
   0   2 -14    5.35    1.96   0
   0   3 -16    3.19    1.81   0
   0   5 -19    3.98    2.21   0
   0   5  14  125.12    3.03   0
   0   6 -20   14.88    3.01   0
   0   6  15   15.55    1.87   0
   0   7  16  135.35    3.18   0
   0   9  17    2.16    2.13   0
   1  -1  -4  271.57    3.53   0
   1  -1  -3  766.80    5.94   0
   1  -1  -2   83.89    2.64   0
   1   0 -11 4374.75    9.18   0
   1   1 -14    2.51    2.61   0
   1   3 -18  140.30    3.36   0
   1   4 -20    5.17    2.19   0
   1   4  14   34.18    2.06   0
   1   5 -21   -1.00    2.13   0
   1   5  15   14.49    1.93   0
   1   6  16   22.71    2.10   0
   1   7  17   27.69    2.27   0
   1   8  18   -4.26    2.92   0
   2  -1 -10  893.54    4.25   0
   2  -1   4  565.98    7.74   0
   2   0 -14  303.01    2.89   0
   2   1  10  486.56    3.73   0
   2   2  12  500.42    3.52   0
   2   3 -20    3.69    2.02   0
   2   3  14   67.62    2.88   0
   2   4  15   14.72    1.88   0
   2   7  18   60.43    2.39   0
   3  -2  -8   49.60    1.95   0
   3  -2  -7    3.50    2.50   0
   3  -1 -13   49.07    2.05   0
   3   0 -16    0.83    1.84   0
   3   0   9   76.46    2.59   0
   3   1 -18   30.36    2.21   0
   3   2 -20    1.62    2.22   0
   3   2  13  369.59    3.41   0
   3   4  16    6.23    1.99   0
   3   5  17   67.56    2.49   0
   3   6  18    1.69    2.10   0
   4  -2 -11   -0.92    1.94   0
   4  -2 -10  397.79    3.60   0
   4   0 -17   -1.18    2.47   0
   4   0  10  361.33    3.91   0
   4   1  12   40.99    2.14   0
   4   2 -21    2.45    2.18   0
   4   2  14   39.30    2.73   0
   5  -2 -12   47.85    2.13   0
   5  -1 -16   17.45    2.15   0
   5  -1   8  923.13    7.52   0
   5   0 -18   11.52    2.44   0
   5   1 -20   44.99    2.85   0
   5   4  17    0.91    2.61   0
   6  -3  -7  624.37    4.12   0
   6  -3  -6   55.80    2.31   0
   6  -3  -5  280.79    3.49   0
   6  -3  -4    9.64    2.66   0
   6  -3  -3   18.13    2.58   0
   6  -3  -2   14.20    2.15   0
   6  -2 -13   28.95    1.91   0
   6  -1 -16    4.26    2.57   0
   6   0 -19    1.11    2.11   0
   7  -3  -7    6.51    2.01   0
   7  -3  -6    7.95    1.87   0
   7  -3  -5   34.49    2.80   0
   7  -3  -4   33.48    2.96   0
   7  -3  -3  191.04    3.45   0
   7  -3  -2   37.85    2.36   0
   7  -2 -13   17.62    2.55   0
   7  -1 -17   -1.08    2.16   0
   7  -1   8   14.58    3.42   0
   7   2  14   -0.64    2.20   0
   8  -3  -5   83.87    2.66   0
   8  -3  -4   45.89    2.34   0
   8  -2 -13    7.51    2.18   0
   8   0  10    9.08    3.34   0
   8   1  12    6.37    2.87   0
   9  -2 -12   10.27    2.34   0
  10  -2   0   43.23    3.36   0
  -5  11  -2    0.41    3.05   0
  -5  11  -1    0.75    3.03   0
  -5  11   0   -1.46    3.03   0
  -5  11   1    3.44    4.05   0
  -5  11   2    3.04    3.91   0
  -5  12  -5    1.18    3.30   0
  -5  12   2    6.11    3.62   0
  -5  12   3    9.22    3.18   0
  -4   7   3    0.49    1.81   0
  -4   8   6    9.49    2.97   0
  -4   9   7    6.17    1.95   0
  -4  10   9   19.30    2.94   0
  -4  11   9    5.60    2.45   0
  -4  12  10    2.26    2.40   0
  -3   6 -10  186.41    4.58   0
  -3   7 -12   31.09    2.67   0
  -3   7   9   -0.13    1.83   0
  -3   8  11   59.28    2.66   0
  -3   9  12   -0.64    2.66   0
  -3  10  12   10.93    2.14   0
  -3  11  13    6.17    2.32   0
  -2   3   4  270.06    3.22   0
  -2   6  11   16.56    1.86   0
  -2  10  15   -0.02    2.13   0
  -1   2   6  590.94    4.40   0
  -1   4  11  181.98    3.15   0
  -1   5 -16   47.57    2.57   0
  -1   6  14  350.06    3.47   0
  -1   7  15   15.79    2.92   0
  -1   8  16    6.87    2.36   0
   0   0  -4 5945.57   16.05   0
   0   1 -10  424.26    3.76   0
   0   1   6 1476.05    6.64   0
   0   2 -13   26.12    2.70   0
   0   2   9  225.34    2.75   0
   0   3  11  577.05    3.83   0
   0   4 -17   33.26    2.55   0
   0   4  13   25.55    2.00   0
   0   8  17    5.25    2.18   0
   1   0 -10   -1.83    2.34   0
   1   1   9 1094.83    5.54   0
   1   2 -16  312.14    3.17   0
   1   2  11  163.71    2.66   0
   1   3  13  157.81    2.50   0
   1   4 -19    1.81    2.66   0
   1   5  16   51.14    2.71   0
   1   6  17   13.26    2.55   0
   1   7  18    1.06    2.57   0
   2  -1  -9 3246.43    7.76   0
   2   0 -13   37.91    2.02   0
   2   0   8  926.15    5.43   0
   2   1 -16   93.05    2.30   0
   2   2 -18   79.88    2.39   0
   2   4 -21   19.84    2.14   0
   2   5  17   36.87    2.63   0
   3  -2  -6  922.07    4.46   0
   3  -2   0  554.16    5.94   0
   3  -1 -12  129.54    2.25   0
   3   0 -15  114.13    2.15   0
   3   1 -17    8.68    2.48   0
   3   2 -19   37.21    2.69   0
   3   3 -21    2.49    2.12   0
   3   3  15    1.11    1.77   0
   4  -2  -9  488.83    3.89   0
   4  -1 -14    3.49    1.88   0
   4   0 -16    5.86    2.55   0
   4   2 -20   52.09    3.10   0
   4   4  17    1.82    2.27   0
   4   5  18   13.76    2.17   0
   5  -2 -11  468.96    3.36   0
   5  -1 -15   92.54    2.21   0
   5   0 -17   44.05    2.82   0
   5   1  13   16.84    2.57   0
   5   3  16   70.47    2.55   0
   6  -2 -12  115.88    2.44   0
   6  -1 -15   91.30    3.15   0
   6   0 -18   16.78    2.26   0
   6   0  11   -0.49    2.42   0
   6   1  13    7.68    2.56   0
   6   3  16   -1.50    2.29   0
   7  -2 -12    0.54    2.05   0
   7  -1 -16   92.69    2.55   0
   7   0 -18   -2.68    2.29   0
   8  -2 -12   38.91    2.34   0
   8  -2 -11   24.06    2.75   0
   8  -1 -15    0.71    2.99   0
   9  -2 -11   31.32    2.31   0
   9  -2 -10   -1.11    2.78   0
   9  -2   2   -0.08    2.75   0
  10  -2  -6    0.50    3.20   0
  10  -2  -3   12.11    2.94   0
  10  -2  -2   35.74    3.13   0
  10  -2  -1    4.20    2.18   0
  -5  10  -1   -0.23    3.47   0
  -5  11  -4    0.12    3.59   0
  -5  11   3    1.83    2.85   0
  -5  11   4    2.02    3.84   0
  -5  12   4    9.41    2.98   0
  -5  12   5    4.59    4.16   0
  -4   7   4   -1.22    1.98   0
  -4   8   7   12.02    2.96   0
  -4   9   8    9.67    1.94   0
  -4  10  10   -4.19    2.60   0
  -4  11  10    2.36    2.47   0
  -3   4  -1  115.34    3.57   0
  -3   4   0  807.02    6.55   0
  -3   7  10    3.67    2.07   0
  -3   8 -13   17.21    2.84   0
  -3   9 -14    0.69    2.75   0
  -3  10  13   15.45    2.35   0
  -3  11  14   -1.06    2.48   0
  -2   3  -7  256.43    3.96   0
  -2   4 -10  476.58    4.85   0
  -2   4   8   41.25    1.93   0
  -2   5  10  298.26    2.86   0
  -2   6 -14  152.48    2.88   0
  -2   6  12   69.97    2.31   0
  -2   7  13    6.12    1.96   0
  -2   8  14    0.63    2.08   0
  -2   9  15    1.13    2.17   0
  -2  10  16    2.81    2.79   0
  -1   2  -9  807.69    5.17   0
  -1   3 -12   40.70    2.01   0
  -1   3   9 1228.70    5.09   0
  -1   4 -14   31.10    2.19   0
  -1   5  13  394.38    3.09   0
  -1   6 -17    6.78    1.93   0
  -1   7 -18    1.99    2.18   0
  -1   9  17   22.59    2.20   0
   0   0  -3    1.44    1.53   0
   0   3 -15   46.66    2.29   0
   0   3  12  157.81    2.98   0
   0   5 -18   47.04    2.19   0
   0   5  15   26.68    2.07   0
   0   6 -19    2.35    2.59   0
   0   6  16   26.99    2.24   0
   0   7  17   21.68    2.08   0
   0   8  18    2.32    2.13   0
   1   0   6    0.40    1.85   0
   1   1 -13    2.24    1.89   0
   1   2 -15   17.85    2.89   0
   1   3 -17   52.40    2.10   0
   1   4  15   30.41    1.99   0
   1   5 -20   21.17    2.14   0
   2  -1  -8 1714.87    5.74   0
   2   0 -12   90.96    2.79   0
   2   1  11  316.11    3.28   0
   2   2 -17   54.36    2.04   0
   2   2  13  215.31    2.70   0
   2   3 -19   21.78    1.94   0
   2   3  15   -3.49    2.37   0
   2   4 -20   11.36    2.66   0
   2   4  16   43.38    2.00   0
   3  -2  -5  158.89    2.39   0
   3  -2  -4  210.75    2.76   0
   3  -2  -3   27.10    2.57   0
   3  -2  -2  354.26    4.19   0
   3  -2  -1 2298.71    9.74   0
   3  -1 -11  597.96    3.64   0
   3   0 -14    5.72    2.33   0
   3   0  10    7.74    2.73   0
   3   1  12   -1.07    1.89   0
   3   2  14    1.01    1.81   0
   3   3 -20    5.86    2.28   0
   3   4  17   27.83    2.06   0
   3   5  18   10.75    2.10   0
   4  -2  -8  111.44    2.54   0
   4  -2   3   47.00    4.40   0
   4  -1 -13   24.22    1.88   0
   4   1 -18   23.01    2.11   0
   4   1  13    4.15    2.43   0
   4   3 -21   14.57    2.33   0
   4   3  16    2.54    1.85   0
   5  -2 -10  136.00    2.46   0
   5  -1 -14   -0.93    2.00   0
   5   0  11  851.17    5.69   0
   5   1 -19    5.00    2.29   0
   5   2 -20   36.93    2.98   0
   5   2  15   22.54    2.00   0
   6  -2 -11   29.15    2.03   0
   6  -2 -10  239.00    3.51   0
   6  -1 -14   69.68    2.91   0
   6   1 -19   29.76    2.33   0
   6   2  15   -0.54    2.85   0
   7  -2 -11   23.95    2.09   0
   7  -1 -15    1.33    2.24   0
   7   0 -17    8.18    2.59   0
   7   0  11  150.40    4.00   0
   7   1  13    6.90    2.89   0
   8  -2 -10   35.34    2.02   0
   8  -1 -14    2.36    2.53   0
   9  -2  -9   28.21    2.32   0
   9  -2  -8   -0.78    3.10   0
   9  -2   1   47.84    3.30   0
  10  -2  -5    0.05    2.32   0
  10  -2  -4    7.41    2.14   0
  -5  10  -3    2.96    3.13   0
  -5  10  -2    0.38    2.62   0
  -5  10   3    1.39    2.60   0
  -5  10   4    1.73    3.06   0
  -5  11   6   -0.30    3.21   0
  -5  12  -6    0.42    4.35   0
  -5  12   6   -5.19    2.95   0
  -5  12   7    7.44    3.50   0
  -4   8   8   31.54    2.10   0
  -4   9   9   12.60    2.12   0
  -4   9  10   19.52    2.80   0
  -4  10  11    4.94    3.00   0
  -4  11  11   -4.06    2.18   0
  -3   4  -2   45.33    3.38   0
  -3   4   2   39.96    2.61   0
  -3   5  -7  409.66    6.95   0
  -3   5   7  203.17    3.51   0
  -3   6   9   29.29    2.00   0
  -3   8  12    9.20    1.78   0
  -3   9  13    5.09    1.90   0
  -3  10  14   12.91    2.24   0
  -2   3   6  381.46    3.61   0
  -2   4   9  113.57    2.35   0
  -2   5 -12  126.49    3.00   0
  -2   5  11   24.92    1.95   0
  -2   6  13   98.62    2.73   0
  -2   7 -15    5.42    2.18   0
  -2   7  14    8.82    1.83   0
  -2   8 -16   -0.78    2.21   0
  -2   8  15   20.77    2.05   0
  -2   9  16   17.85    2.25   0
  -1   2   7  438.40    3.48   0
  -1   3  10  118.36    2.27   0
  -1   4  12  156.15    2.46   0
  -1   5 -15    9.17    2.58   0
  -1   5  14   97.36    2.80   0
  -1   6  15   62.24    2.02   0
  -1   7  16    6.53    2.01   0
  -1   8  17   -4.60    2.21   0
  -1   9  18    0.14    2.29   0
   0   0  -2   61.64    2.68   0
   0   1  -9    7.38    1.75   0
   0   1   7  772.53    4.72   0
   0   2 -12  963.39    4.70   0
   0   2  10  828.88    4.29   0
   0   3 -14  544.16    4.17   0
   0   4 -16   41.18    2.14   0
   0   4  14  352.62    3.11   0
   0   6  17    0.90    2.77   0
   0   7  18   10.04    2.96   0
   1   0  -9  191.51    2.39   0
   1   1 -12   16.64    2.06   0
   1   1  10    2.46    2.45   0
   1   2  12  416.14    3.16   0
   1   3  14   24.07    2.03   0
   1   4  16    5.49    2.21   0
   1   5 -19   91.23    3.36   0
   1   5  17   15.80    1.94   0
   1   6  18    8.95    2.06   0
   1   7  19   -0.15    2.08   0
   2  -1  -7  353.84    3.45   0
   2   1 -14   60.81    2.71   0
   2   3 -18   89.31    2.92   0
   2   4  17   14.93    2.61   0
   2   5 -21    9.01    2.31   0
   2   5  18  110.40    2.67   0
   2   6  19   11.26    2.14   0
   3  -1 -10  216.45    2.72   0
   3   1 -16    3.58    1.87   0
   3   2 -18    3.24    2.17   0
   3   3  16    6.09    2.06   0
   3   4 -21   22.29    2.11   0
   4  -2  -7  243.72    3.29   0
   4  -1 -12    6.95    1.95   0
   4  -1   8  653.20    5.96   0
   4   0 -15   -2.05    1.85   0
   4   0  11    1.62    1.83   0
   4   1 -17   69.58    2.34   0
   4   2 -19   12.69    2.21   0
   4   2  15    8.74    2.00   0
   4   4  18   -1.34    2.06   0
   5  -2  -9  686.54    3.88   0
   5  -2  -8   49.73    2.69   0
   5  -1 -13   -3.85    2.14   0
   5   0 -16    0.68    2.15   0
   5   1 -18   60.88    2.25   0
   5   3  17    2.08    2.84   0
   6  -2  -9   50.31    2.89   0
   6  -1 -13   -5.78    2.59   0
   6   1 -18   -1.39    2.93   0
   7  -2 -10   69.62    2.10   0
   7  -2  -9   26.25    2.63   0
   7  -2   4    2.33    3.15   0
   7  -1 -14   21.31    1.90   0
   7   0 -16   -0.98    3.00   0
   8  -2  -9   36.79    2.17   0
   8  -2  -8   34.20    2.93   0
   8  -2   3   23.95    2.91   0
   8  -1 -13   18.35    2.24   0
   8   0 -16    2.11    2.32   0
   9  -2  -7    3.28    2.19   0
   9  -2  -6    8.95    2.71   0
   9  -2   0   11.87    2.75   0
   9  -1 -12   -5.19    2.63   0
   9  -1   6   38.03    4.81   0
  -5   9   0   -1.85    2.58   0
  -5   9   1    6.92    2.66   0
  -5   9   2    1.15    2.67   0
  -5  10   5    5.07    2.35   0
  -5  10   6    4.08    2.99   0
  -5  11   7    4.78    2.81   0
  -5  12   8    9.95    2.94   0
  -4   6   3   15.25    2.58   0
  -4   7   7    9.09    1.86   0
  -4   8   9    7.45    2.04   0
  -4   9  11   -0.50    2.71   0
  -4  10  12   12.29    3.26   0
  -4  11 -11    0.52    3.74   0
  -4  11  12   14.82    2.38   0
  -3   4   3 2457.76    8.59   0
  -3   4   4  474.85    4.44   0
  -3   5   8    8.07    2.75   0
  -3   6  10   64.36    2.09   0
  -3   7 -11   46.64    3.14   0
  -3   7  12   56.95    2.30   0
  -3   8  13    2.62    2.16   0
  -3   9  14    3.08    2.17   0
  -3  10 -14    3.96    3.02   0
  -3  10  15    0.14    2.13   0
  -2   3   7  717.81    4.26   0
  -2   4  10  491.53    4.04   0
  -2   5  12   77.79    2.06   0
  -2   6 -13   44.83    3.02   0
  -2   7  15   -4.49    2.17   0
  -2   8  16   -1.54    2.09   0
  -2   9  17   -1.63    2.94   0
  -1   1  -1   37.73    6.09   0
  -1   1   0 1674.33   15.61   0
  -1   1   1  522.99    6.57   0
  -1   2  -8 2431.13    8.49   0
  -1   2   8   90.74    2.45   0
  -1   3 -11    2.17    2.04   0
  -1   3  11  135.77    2.98   0
  -1   4 -13  440.08    3.71   0
  -1   4  13   57.65    2.74   0
  -1   6 -16   25.31    2.27   0
  -1   6  16   13.02    2.65   0
  -1   7 -17   33.50    2.77   0
  -1   7  17  161.10    2.63   0
  -1   8 -18    2.46    2.16   0
  -1   8  18    5.52    2.02   0
   0   1   8 2281.08    7.32   0
   0   2  11    4.39    2.52   0
   0   3  13  628.53    3.70   0
   0   4  15   47.65    2.92   0
   0   5 -17   87.69    2.60   0
   0   5  16  180.03    2.47   0
   0   6 -18    5.12    2.59   0
   0   7 -19   -0.52    2.55   0
   0   8  19   14.27    2.24   0
   1   0  -8   78.91    2.02   0
   1   0   7 2162.14    8.21   0
   1   2 -14   49.57    2.19   0
   1   2  13  735.57    4.34   0
   1   3 -16  117.49    2.28   0
   1   3  15  109.30    2.78   0
   1   6 -20    1.43    1.98   0
   1   6  19    3.49    2.46   0
   2  -1  -6 1136.22    5.50   0
   2   0 -11   -0.76    1.82   0
   2   0   9    7.13    1.84   0
   2   1  12  344.42    3.23   0
   2   2 -16   82.17    2.16   0
   2   2  14   77.64    2.35   0
   2   3  16    8.13    2.43   0
   2   4 -19    4.49    1.82   0
   2   5 -20   26.79    2.55   0
   3  -1  -9  841.16    4.12   0
   3  -1   7  860.71    6.48   0
   3   0 -13   78.30    2.16   0
   3   1 -15   18.86    2.47   0
   3   1  13   36.78    2.18   0
   3   2 -17   12.11    2.24   0
   3   2  15   34.26    2.01   0
   3   3 -19  114.12    2.42   0
   3   4 -20   -2.00    2.61   0
   3   4  18   12.00    2.04   0
   3   5  19   19.32    2.11   0
   4  -2  -6  401.67    3.35   0
   4  -2  -5 1302.95    5.70   0
   4  -1 -11  592.19    3.59   0
   4   0 -14   56.69    1.97   0
   4   1 -16   45.54    2.63   0
   4   2 -18    3.11    2.50   0
   4   3 -20    7.04    1.99   0
   4   3  17   61.02    2.37   0
   5  -2  -7   52.15    2.56   0
   5  -2   4  210.79    7.07   0
   5  -1 -12   45.88    2.14   0
   5  -1   9   62.34    2.92   0
   5   0 -15   74.95    2.09   0
   5   1 -17   18.72    2.15   0
   5   1  14   23.23    2.21   0
   5   2 -19   22.39    2.25   0
   5   2  16   26.18    2.56   0
   6  -2  -8   97.47    2.36   0
   6  -1 -12   43.66    2.90   0
   6  -1   9   11.17    3.12   0
   6   0 -15    2.13    2.80   0
   6   1  14   18.20    3.02   0
   6   2 -19    3.69    2.82   0
   7  -2  -8    2.52    1.98   0
   7  -1 -13   -0.55    2.04   0
   7  -1 -12   -2.15    2.84   0
   7   0 -15   -7.38    2.93   0
   7   1 -18   42.34    2.31   0
   8  -2  -7   44.90    2.36   0
   8  -2  -6   35.79    2.96   0
   8  -2   2   33.49    3.01   0
   8  -1 -12    0.90    2.14   0
   8   0 -15    5.90    2.16   0
   9  -2  -5    6.79    2.08   0
   9  -2  -4    6.68    1.92   0
   9  -2  -3    3.06    1.93   0
   9  -2  -2    0.24    1.97   0
   9  -2  -1   59.68    2.50   0
   9  -1 -11    7.04    2.09   0
  -5   9   4    1.92    1.95   0
  -5  10  -4   -0.09    3.10   0
  -5  10   7    8.06    2.14   0
  -5  11   8    2.91    2.57   0
  -5  11   9   -4.84    2.95   0
  -4   6  -2   29.80    2.96   0
  -4   6   5    3.86    2.30   0
  -4   7   8   62.56    2.37   0
  -4   8  10    5.03    1.82   0
  -4   9  -9    4.92    4.01   0
  -4   9  12   15.44    2.74   0
  -4  10 -10    1.85    3.98   0
  -4  10  13   30.33    3.13   0
  -4  11  13    6.69    2.38   0
  -3   4  -3 1027.67   13.48   0
  -3   4   5    0.60    2.45   0
  -3   5   9   82.30    2.77   0
  -3   6  -9    1.25    2.60   0
  -3   6  11   35.38    2.08   0
  -3   7  13    6.23    2.44   0
  -3   8 -12   54.53    3.30   0
  -3   8  14   12.90    2.04   0
  -3   9 -13   -1.73    3.06   0
  -3   9  15   21.88    2.29   0
  -3  10  16    5.50    2.39   0
  -2   3  -6  242.70    4.41   0
  -2   4  -9   18.39    3.11   0
  -2   5 -11   27.07    2.71   0
  -2   5  13   91.61    2.90   0
  -2   6  14   58.37    2.18   0
  -2   7 -14   15.79    2.83   0
  -2   7  16    9.99    2.64   0
  -2   8 -15   -0.99    2.78   0
  -2   8  17    6.55    2.89   0
  -2   9 -16   41.09    3.00   0
  -1   1   2   78.59    2.60   0
  -1   5 -14  361.37    3.99   0
  -1   5  15    0.73    1.84   0
   0   1  -8 2413.92    7.57   0
   0   2 -11    5.97    1.89   0
   0   3 -13  680.28    4.38   0
   0   3  14  536.29    3.96   0
   0   4 -15   48.90    2.32   0
   0   5  17   88.41    2.31   0
   0   6  18   10.65    1.88   0
   0   7  19   -4.00    2.08   0
   1   0  -7 1054.74    5.31   0
   1   1 -11    6.62    2.02   0
   1   1  11  787.63    4.83   0
   1   3 -15  291.83    3.55   0
   1   4 -17    0.83    1.95   0
   1   4  17   28.87    2.13   0
   1   5 -18    3.94    2.84   0
   1   5  18   -2.90    1.94   0
   2  -1   5 2461.05   12.50   0
   2   0 -10  151.28    2.36   0
   2   1 -13   45.00    2.16   0
   2   2 -15   26.33    2.55   0
   2   3 -17  105.13    2.23   0
   2   4  18   21.68    1.98   0
   2   5  19    4.92    2.01   0
   3   0 -12   -1.93    1.91   0
   3   0  11 4651.79   10.87   0
   3   3 -18  104.49    2.43   0
   3   3  17   24.84    2.12   0
   4  -2  -4  112.43    2.48   0
   4  -1 -10   27.38    2.05   0
   4   0 -13    1.13    2.44   0
   4   0  12  217.73    3.61   0
   4   1  14   -0.22    1.83   0
   4   2  16   17.43    2.10   0
   4   3 -19   34.04    2.28   0
   5  -2  -6   22.83    2.00   0
   5  -1 -11  100.71    2.24   0
   5   0  12    0.14    1.94   0
   5   1 -16   11.38    2.94   0
   5   2 -18   86.65    2.45   0
   5   3 -20    0.11    2.21   0
   6  -2  -7    2.06    1.92   0
   6  -1 -11  144.20    3.11   0
   6   0 -14   -3.48    2.79   0
   6   0  12   86.92    2.74   0
   6   1 -17   49.75    2.37   0
   6   2  16    2.75    2.09   0
   7  -2  -7   11.16    1.85   0
   7  -2  -6   33.70    3.01   0
   7  -1 -11   19.33    2.58   0
   7   1 -17   -4.13    2.18   0
   7   1  14    0.28    2.82   0
   8  -2  -5   19.66    2.11   0
   8  -2  -4   19.45    2.79   0
   8  -2   1   98.62    3.26   0
   8  -1 -11   43.51    2.20   0
   8   0 -14   25.80    2.26   0
   8   0  11    0.97    3.20   0
   9  -1 -10   33.00    2.27   0
  -5   9  -2    1.37    2.60   0
  -5   9   6    5.90    2.26   0
  -5   9   7   51.87    3.33   0
  -5  10   8   -2.27    2.12   0
  -5  11  10    2.48    2.45   0
  -4   6   7   30.50    2.56   0
  -4   7   9    9.18    1.85   0
  -4   8  11   10.79    1.93   0
  -4   9  13    2.57    3.06   0
  -4  10  14    3.62    3.02   0
  -3   6  12   49.64    2.07   0
  -3   7  14   -2.15    2.77   0
  -3   9  16    4.65    2.02   0
  -2   4  11  129.50    2.35   0
  -2   6  15  195.14    2.60   0
  -1   2  -7 1994.25    8.41   0
  -1   2   9 1109.99    4.94   0
  -1   3 -10   -1.44    1.90   0
  -1   3  12   42.09    1.96   0
  -1   4 -12   15.18    2.08   0
  -1   4  14  174.14    2.72   0
  -1   5  16  166.93    2.45   0
  -1   6 -15    2.00    2.34   0
  -1   6  17    9.33    1.93   0
  -1   7 -16   10.26    2.67   0
  -1   8 -17    1.22    2.94   0
  -1   8  19    3.12    2.13   0
   0   0   2   60.47    2.99   0
   0   2  12  904.86    4.37   0
   0   4  16   49.54    2.09   0
   0   5 -16  188.67    2.75   0
   0   6 -17    7.17    2.54   0
   0   6  19    2.18    2.68   0
   0   7 -18    4.29    2.96   0
   1   0   8    1.30    2.19   0
   1   1 -10   84.28    2.69   0
   1   2 -13  666.40    3.72   0
   1   2  14  620.91    3.72   0
   1   3  16   10.73    1.83   0
   1   5  19    2.76    2.79   0
   1   6 -19   24.32    2.20   0
   1   6  20    1.79    2.22   0
   2  -1  -5   92.57    2.34   0
   2   0  10    5.67    1.95   0
   2   1  13   13.72    2.07   0
   2   2  15    5.84    1.78   0
   2   3 -16    2.58    2.53   0
   2   3  17   21.87    2.09   0
   2   4 -18    3.60    2.08   0
   2   5 -19   15.48    2.17   0
   2   5  20   11.77    2.69   0
   2   6 -20    3.27    2.17   0
   3   0 -11  588.06    3.96   0
   3   1 -14   18.25    1.88   0
   3   1  14   81.26    2.36   0
   3   2 -16   19.27    2.07   0
   3   2  16  210.79    2.91   0
   3   3  18   31.53    2.60   0
   3   4 -19   -0.14    2.19   0
   3   4  19   13.23    2.02   0
   3   5 -20    2.52    2.17   0
   4  -2  -3 1495.89    6.55   0
   4  -2   2 2486.15   13.83   0
   4  -1  -9   46.51    2.29   0
   4  -1   9  423.23    4.89   0
   4   1 -15   42.95    1.97   0
   4   2 -17    6.73    2.08   0
   4   3  18   30.22    2.06   0
   4   4 -20   -1.14    2.14   0
   5  -2  -5   31.06    2.17   0
   5  -2  -4    1.69    2.86   0
   5  -1 -10   83.55    2.30   0
   5   0 -13  401.49    3.57   0
   5   1  15   -3.37    2.31   0
   5   3 -19    2.58    2.06   0
   6  -2  -6   20.24    2.11   0
   6  -2  -5   22.13    2.62   0
   6  -2   4   52.52    3.70   0
   6   1 -16   11.93    1.85   0
   6   2 -18    9.98    2.10   0
   6   3 -19   34.34    3.20   0
   7  -2  -5    2.94    1.97   0
   7  -2  -4  151.17    3.31   0
   7  -2   3   92.21    3.51   0
   7   0 -14    1.21    1.80   0
   7   0  12   -0.02    2.83   0
   7   1 -16   74.45    2.51   0
   8  -2  -3   35.54    1.96   0
   8  -2  -2    9.01    1.75   0
   8  -2  -1   41.12    2.43   0
   8  -2   0    3.52    2.38   0
   8  -1 -10    2.40    1.99   0
   8   0 -13   -6.34    2.18   0
   9  -1  -9    0.07    2.15   0
   9   0 -12    3.43    2.55   0
  10  -1  -6   -0.59    2.28   0
  10  -1  -5   43.90    2.92   0
  10  -1   2    2.21    3.15   0
  -5   8   1    5.55    2.72   0
  -5   8   2   22.13    2.25   0
  -5   8   3    1.10    1.90   0
  -5   8   4    5.52    1.91   0
  -5   8   5    0.75    2.88   0
  -5   9  -3    6.57    2.78   0
  -5   9   8   14.91    2.17   0
  -5  10  10   30.10    2.53   0
  -5  11  -6    3.61    4.32   0
  -5  11  11   -2.37    2.63   0
  -4   6  -3    5.43    2.50   0
  -4   7  10   47.14    2.01   0
  -4   7  11    1.37    2.66   0
  -4   8  12   13.35    2.18   0
  -4   9  14   55.38    3.30   0
  -4  10  15    7.89    3.33   0
  -3   4   7    6.24    1.95   0
  -3   4   8    7.47    2.39   0
  -3   6  13  116.76    2.22   0
  -3   7  15   61.28    2.91   0
  -3   8  16    0.32    2.01   0
  -3   9  17   -1.25    2.28   0
  -2   2   2 1870.69    9.06   0
  -2   2   3 3336.76   10.79   0
  -2   3   9   37.58    1.81   0
  -2   5  14   11.09    1.83   0
  -2   6 -12   76.38    3.14   0
  -2   6  16   -0.58    1.99   0
  -2   7  17    6.72    1.92   0
  -2   8  18    3.48    2.10   0
  -1   1   4  260.20    3.53   0
  -1   1   5 2284.59    8.34   0
  -1   2  10  173.32    2.40   0
  -1   3  13   64.97    2.04   0
  -1   4  15  378.57    3.13   0
  -1   5  17   99.35    2.89   0
  -1   6  18   -0.14    1.91   0
  -1   7  19    6.69    2.19   0
   0   0   3    1.85    1.49   0
   0   1  -7  847.34    5.02   0
   0   1  10  393.59    3.51   0
   0   2 -10  875.05    4.63   0
   0   2  13   30.68    2.68   0
   0   3 -12  165.61    3.04   0
   0   3  15   48.45    2.13   0
   0   4 -14  383.90    3.44   0
   0   4  17   29.75    2.50   0
   0   5  18   51.41    1.91   0
   1   0  -6    0.51    1.84   0
   1   1  12  180.02    2.61   0
   1   2 -12    9.45    2.70   0
   1   3 -14  598.58    4.02   0
   1   4 -16   84.43    2.29   0
   1   4  18   19.73    2.04   0
   1   5 -17  112.14    3.00   0
   1   6 -18    7.14    2.60   0
   1   7 -19   14.78    2.99   0
   2  -1  -4  613.11    4.58   0
   2  -1   6   27.47    2.48   0
   2   0  -9   40.44    2.20   0
   2   2 -14  135.81    2.34   0
   2   2  16  134.63    2.90   0
   2   4 -17   39.05    2.69   0
   2   4  19   -6.33    2.14   0
   3  -1  -7   37.05    1.72   0
   3  -1   8  140.50    2.93   0
   3   0  12    2.20    2.54   0
   3   1 -13   33.21    2.02   0
   3   2 -15    4.76    2.31   0
   3   4 -18    8.06    2.82   0
   4  -2  -1    2.81    1.85   0
   4  -2   0  251.48    4.41   0
   4  -2   1   94.05    3.71   0
   4  -1  -8  185.70    3.14   0
   4   0 -12  835.93    4.05   0
   4   1 -14    1.78    1.84   0
   4   1  15   75.69    2.43   0
   4   2 -16    4.93    1.79   0
   4   2  17   -1.62    2.00   0
   4   3 -18    8.53    1.84   0
   4   4 -19    4.90    2.19   0
   4   5 -20   -5.07    3.09   0
   5  -2  -3    7.69    2.74   0
   5  -1  -9   11.29    2.51   0
   5   0 -12    2.69    2.72   0
   5   0  13   83.72    3.01   0
   5   1 -15   94.47    2.16   0
   5   2 -17    0.84    2.05   0
   5   2  17    1.36    1.90   0
   5   3 -18   30.31    2.84   0
   6  -2  -4   19.32    1.82   0
   6  -1 -10   34.03    2.18   0
   6   0 -13    3.04    1.82   0
   6   1 -15  101.04    2.42   0
   6   1  15   16.67    2.20   0
   6   2 -17   -2.59    2.04   0
   7  -2  -3   26.33    2.06   0
   7  -2  -2   42.87    2.96   0
   7  -2   2   67.64    3.25   0
   7  -1  -9    8.03    2.64   0
   7  -1   9   89.71    5.03   0
   7   0 -13   -3.17    2.05   0
   7   1 -15    8.24    2.19   0
   7   2 -17   16.09    2.33   0
   8  -1  -9   43.94    2.26   0
   8   0 -12   50.33    2.80   0
   8   1 -15   -5.88    2.23   0
   9  -1  -7    7.37    2.32   0
   9   0 -11   20.91    2.70   0
  10  -1  -4   -1.34    2.19   0
  10  -1  -3   18.79    2.34   0
  10  -1  -2    1.87    2.66   0
  10  -1  -1   -3.39    2.94   0
  10  -1   0    5.76    2.59   0
  10  -1   1    3.77    2.49   0
  -6  12   2   -1.30    4.32   0
  -5   8  -1   48.09    2.94   0
  -5   8   6    4.51    1.96   0
  -5   8   7    3.49    1.91   0
  -5   9   9    0.36    2.12   0
  -5   9  10   -0.27    2.70   0
  -5  10  -5    5.90    3.49   0
  -5  10  11   -3.25    2.37   0
  -5  10  12   22.08    2.90   0
  -4   6   9    1.38    1.76   0
  -4   7  12    7.46    2.38   0
  -4   8  13   51.27    2.27   0
  -4   8  14    0.05    2.52   0
  -4   9  15    1.91    2.07   0
  -3   4   9   43.88    2.73   0
  -3   5  12   37.47    2.20   0
  -3   6  14    1.40    1.80   0
  -3   7 -10  128.67    3.76   0
  -3   7  16   27.55    2.31   0
  -3   8  17   11.81    2.04   0
  -3  10 -13   15.91    2.96   0
  -2   2   0 1391.61   10.63   0
  -2   2   4  430.90    4.32   0
  -2   2   5 1170.16    5.94   0
  -2   3  10   57.20    2.17   0
  -2   4  -8   13.61    2.54   0
  -2   4  13  168.90    2.42   0
  -2   5 -10  490.20    4.78   0
  -2   5  15   31.42    2.06   0
  -2   6  17   14.28    2.79   0
  -2   7 -13   11.71    2.37   0
  -2   7  18   21.12    2.23   0
  -2   8 -14    0.59    2.81   0
  -2   9 -15    4.17    2.08   0
  -1   1   6  195.08    3.37   0
  -1   2  11  481.49    3.82   0
  -1   3  -9    0.41    2.46   0
  -1   3  14  550.75    3.86   0
  -1   4  16   75.75    2.96   0
  -1   5 -13  116.65    2.69   0
  -1   6  19   15.55    2.96   0
  -1   7  20   12.99    2.29   0
  -1   9 -17   16.75    2.67   0
   0   0   4 5831.16   15.91   0
   0   3  16    5.43    2.41   0
   0   5 -15   22.66    2.13   0
   0   5  19   12.94    2.11   0
   0   6 -16   25.69    2.89   0
   0   6  20   12.07    2.11   0
   0   7 -17   26.63    2.74   0
   0   8 -18   -2.92    2.59   0
   1   0   9  198.39    2.80   0
   1   1  -9 3650.63    8.51   0
   1   1  13  148.54    2.91   0
   1   2  15   13.79    1.77   0
   1   3  17   41.10    2.01   0
   1   4 -15  412.01    3.91   0
   1   4  19   40.86    2.85   0
   1   5  20    4.69    2.10   0
   2  -1  -3 7697.78   15.92   0
   2   0  -8 3564.71    8.05   0
   2   0  11    3.95    1.88   0
   2   1 -11  149.20    2.55   0
   2   1  14   65.94    2.34   0
   2   3 -15    6.75    2.34   0
   2   3  18   49.55    2.08   0
   2   4  20   28.35    2.59   0
   2   5 -18   54.28    2.11   0
   2   6 -19   -4.25    2.13   0
   3  -1  -6  150.54    2.28   0
   3   0 -10    2.90    2.04   0
   3   1  15   19.88    1.97   0
   3   2  17   20.58    2.04   0
   3   3 -16   12.80    2.51   0
   3   3  19   80.98    3.13   0
   3   5 -19   39.02    2.32   0
   3   6 -20    0.45    2.20   0
   4   0 -11   -1.09    1.98   0
   4   0  13   -0.78    1.84   0
   4   3 -17    5.50    1.88   0
   4   3  19   -0.80    2.21   0
   5  -2  -2   46.60    2.34   0
   5  -2  -1 1251.55    7.11   0
   5  -2   3  142.99    4.67   0
   5  -1  -8  449.29    3.71   0
   5  -1  10   23.28    2.75   0
   5   1 -14   -1.99    2.02   0
   5   2 -16   23.31    2.11   0
   5   4 -19   -0.23    2.01   0
   6  -2  -3   31.10    2.09   0
   6  -2  -2  323.15    4.16   0
   6  -2   3    8.36    3.29   0
   6  -1  -9  587.58    3.78   0
   6   0 -12   42.02    2.16   0
   6   0  13    0.55    1.82   0
   6   1 -14   52.40    2.89   0
   6   2 -16    7.95    2.57   0
   6   3 -18   23.09    2.14   0
   7  -2  -1  202.29    3.20   0
   7  -2   0    7.93    2.08   0
   7  -2   1   54.72    2.61   0
   7  -1  -8  176.54    3.11   0
   7   0 -12   -3.86    2.02   0
   7   1 -14   24.80    2.47   0
   7   2 -16   -5.52    2.53   0
   8  -1  -8   21.48    2.09   0
   8  -1  -7   81.06    3.06   0
   8   0 -11   -5.33    2.28   0
   8   1 -14   -4.47    2.02   0
   9  -1  -6  120.52    2.78   0
   9  -1  -5   18.48    2.76   0
   9  -1   5   -0.05    2.73   0
   9   0 -10   -1.35    2.21   0
  -6  11   3    4.47    3.42   0
  -6  11   5    2.15    3.44   0
  -5   8   9   -2.21    2.13   0
  -5   9  11   16.45    2.15   0
  -5  10  13    6.75    3.07   0
  -4   5   1   15.15    2.91   0
  -4   5   4    7.79    2.08   0
  -4   5   5   28.58    2.02   0
  -4   5   7    0.47    2.23   0
  -4   6  10    6.68    1.91   0
  -4   6  11    4.35    2.57   0
  -4   7  13    3.87    1.87   0
  -4   8  15    4.97    2.94   0
  -4   9  16   16.27    2.22   0
  -3   4  10  100.41    2.21   0
  -3   5  13   12.56    1.87   0
  -3   6  15    6.40    1.93   0
  -3   8 -11    2.14    2.60   0
  -3   8  18    9.35    2.78   0
  -3   9 -12    6.82    2.56   0
  -2   2   6  263.07    2.89   0
  -2   2   7  649.54    4.13   0
  -2   3  -5 2464.68   14.21   0
  -2   3  11  984.88    4.47   0
  -2   4  14  130.62    2.38   0
  -2   5  16    1.72    1.71   0
  -2   6  18   10.86    2.59   0
  -2   7  19    4.80    2.13   0
  -1   1   7  710.73    4.28   0
  -1   2  -6    6.85    1.83   0
  -1   2  12    6.67    2.60   0
  -1   4 -11  663.11    4.32   0
  -1   5  18    2.61    1.97   0
  -1   6 -14   21.24    2.09   0
  -1   7 -15    4.02    2.06   0
  -1   8 -16    0.41    2.05   0
   0   0   5    0.71    1.95   0
   0   1  -6 1564.67    7.09   0
   0   1  11  118.79    2.35   0
   0   2  -9  216.41    3.41   0
   0   2  14    7.98    1.86   0
   0   4 -13   24.13    1.87   0
   0   4  18   62.39    2.24   0
   0   5  20   14.29    2.72   0
   1   0  -5 1771.30    7.26   0
   1   0  10   -2.05    2.43   0
   1   2 -11  558.06    4.15   0
   1   2  16    5.07    1.62   0
   1   3 -13   76.27    2.81   0
   1   3  18   21.64    2.07   0
   1   5 -16  188.64    2.95   0
   1   6 -17    0.62    2.74   0
   1   7 -18    2.16    2.92   0
   1   8 -19   -4.39    2.36   0
   2  -1   7   73.84    2.72   0
   2   0  12 1089.78    5.28   0
   2   1  15    0.59    2.51   0
   2   2 -13   23.85    1.96   0
   2   2  17   60.09    2.29   0
   2   3  19   -1.37    2.86   0
   2   4 -16   -0.97    1.88   0
   3  -1  -5  145.47    2.78   0
   3  -1   9 1574.61    8.42   0
   3   0  -9   64.66    2.54   0
   3   0  13    1.29    2.60   0
   3   1 -12  116.64    2.23   0
   3   2 -14   19.61    2.05   0
   3   2  18   53.73    2.53   0
   3   4 -17  209.25    2.78   0
   4  -1  -7  556.90    3.69   0
   4  -1  10   89.50    3.20   0
   4   0 -10  399.79    3.54   0
   4   1 -13   23.05    1.91   0
   4   1  16    2.82    1.98   0
   4   2 -15    8.68    1.96   0
   4   2  18    3.19    2.04   0
   4   4 -18   48.86    2.01   0
   4   5 -19   -3.32    1.96   0
   5  -2   0 1237.37    7.46   0
   5  -2   1  486.39    5.54   0
   5  -2   2   21.11    3.07   0
   5   0 -11  538.80    3.45   0
   5   1 -13    1.61    2.77   0
   5   1  16   -0.03    1.98   0
   5   2 -15   -3.28    2.42   0
   5   2  18   -2.46    2.18   0
   5   3 -17    7.47    1.85   0
   5   4 -18    0.09    2.83   0
   6  -2  -1  798.44    5.18   0
   6  -2   0   86.24    2.93   0
   6  -2   1   35.46    2.76   0
   6  -2   2  613.19    6.05   0
   6  -1  -8  130.70    2.42   0
   6  -1  10    5.77    2.48   0
   6   0 -11    2.85    1.90   0
   6   1  16    2.47    2.83   0
   6   3 -17   37.27    2.70   0
   7  -1  -7   20.97    2.82   0
   7   0 -11   41.01    2.12   0
   7   3 -17   10.42    2.08   0
   8  -1  -6   -1.94    2.37   0
   8   0 -10    5.66    2.63   0
   8   1 -13   20.44    2.27   0
   8   2 -15    9.68    2.04   0
   9  -1  -4  183.30    3.00   0
   9  -1  -3   14.40    2.79   0
   9   0  -9   95.88    2.74   0
   9   1 -12    7.53    2.03   0
  10   0  -7    2.00    2.19   0
  -6  11   1   -0.89    3.18   0
  -6  11   6   -2.91    3.04   0
  -6  11   7   -3.38    3.05   0
  -6  11   8    4.04    3.04   0
  -5   7   2   29.55    3.05   0
  -5   7   3   62.92    2.61   0
  -5   7   4    3.14    2.09   0
  -5   7   6    6.84    2.07   0
  -5   8  -2    6.34    2.41   0
  -5   8  10    3.99    2.02   0
  -5   8  11    2.12    2.81   0
  -5   9  -4    2.09    3.21   0
  -5   9  12    9.95    2.32   0
  -5   9  13    5.95    3.01   0
  -4   5   0   43.93    3.22   0
  -4   5   8    4.56    1.85   0
  -4   5   9    5.88    2.44   0
  -4   6  12   10.90    1.95   0
  -4   7  14   34.12    2.04   0
  -4   8  16    8.29    2.91   0
  -3   3   3  976.15    5.72   0
  -3   3   4   19.98    1.72   0
  -3   3   5   51.70    2.46   0
  -3   3   6  136.85    3.03   0
  -3   4  11    0.12    1.82   0
  -3   5  -6    0.43    3.41   0
  -3   5  14    7.17    1.72   0
  -3   6  -8  228.42    4.62   0
  -3   6  16    1.91    1.94   0
  -3   7  17   42.51    2.18   0
  -2   2   8  131.57    2.16   0
  -2   3  12   21.49    1.87   0
  -2   4  15   14.66    1.88   0
  -2   5  17   66.62    2.20   0
  -2   6 -11   36.79    3.09   0
  -2  10 -15    1.20    2.10   0
  -1   1   8 1300.44    5.28   0
  -1   3  15  259.46    2.80   0
  -1   4  17    3.22    1.79   0
  -1   5 -12    2.29    2.50   0
  -1   5  19   77.43    2.46   0
  -1   6  20   -2.07    2.00   0
   0   0   6 1079.53    5.97   0
   0   1  12    2.15    1.94   0
   0   2  15   13.60    2.01   0
   0   3 -11  576.77    3.99   0
   0   3  17   46.21    1.98   0
   0   4  19    6.49    1.87   0
   0   5 -14  135.55    3.03   0
   0   8 -17    1.86    2.91   0
   1   1  -8 1549.77    5.86   0
   1   1  14  239.68    2.74   0
   1   4  20    2.99    2.13   0
   2  -1  -2  263.41    3.84   0
   2   0  -7   15.09    1.63   0
   2   1 -10  836.89    4.11   0
   2   2 -12  788.13    4.25   0
   2   3 -14   41.76    1.97   0
   2   5 -17   67.17    2.43   0
   2   6 -18   13.28    2.17   0
   2   7 -19    2.96    2.06   0
   3   1 -11  640.31    4.01   0
   3   1  16  218.54    2.88   0
   3   3 -15    1.85    1.86   0
   3   3  20    0.96    1.99   0
   3   5 -18   38.57    2.03   0
   3   6 -19    0.59    1.94   0
   4  -1  -6   60.96    2.12   0
   4   0  14    8.41    1.83   0
   4   1 -12    3.10    1.93   0
   4   2 -14   34.41    2.49   0
   4   3 -16    6.71    1.93   0
   4   4 -17   15.71    2.79   0
   5  -1  -7   60.48    2.32   0
   5   0 -10    1.12    2.03   0
   5   0  14    0.02    1.99   0
   5   3 -16    4.25    2.67   0
   5   5 -19   17.36    2.21   0
   6  -1  -7   86.08    2.27   0
   6   0 -10  728.33    4.38   0
   6   0  14    1.18    2.49   0
   6   1 -13   -2.19    1.79   0
   6   2 -15   -1.78    2.02   0
   6   4 -18    3.40    2.14   0
   7  -1  -6  291.20    3.60   0
   7   0 -10    2.18    1.82   0
   7   0  13   17.53    3.05   0
   7   1 -13    0.91    1.94   0
   7   2 -15    1.05    2.09   0
   8  -1  -5    5.66    1.95   0
   8   0  -9    1.42    2.60   0
   8   0  12   20.69    3.81   0
   8   1 -12    1.98    2.04   0
   8   2 -14   11.76    2.74   0
   9  -1  -2  101.94    2.75   0
   9  -1  -1   15.69    2.76   0
   9  -1   3    8.34    3.00   0
   9  -1   4   13.23    2.75   0
   9   0  -8    0.53    2.14   0
   9   1 -11    2.81    2.07   0
  10   0  -6    1.57    2.29   0
  10   0  -5   -4.20    2.97   0
  -6  10   2   -2.29    2.89   0
  -6  10   3    9.82    3.48   0
  -6  10   4    2.20    2.69   0
  -6  10   5   -0.14    2.69   0
  -6  10   6   10.01    2.56   0
  -6  10   7    1.95    2.67   0
  -6  10   8    1.56    3.43   0
  -6  11   0   -1.48    3.34   0
  -5   7   1   47.03    2.52   0
  -5   7   8   14.74    1.92   0
  -5   7   9   47.05    2.06   0
  -5   7  10    8.42    2.26   0
  -5   9  14   -4.81    2.27   0
  -4   5  10    1.64    1.80   0
  -4   6  13    4.84    1.74   0
  -4   7  15   12.67    1.79   0
  -4  11 -10    1.73    3.36   0
  -3   3   2 1097.58    6.25   0
  -3   3   7  583.64    3.85   0
  -3   3   8  690.49    4.29   0
  -3   4  12   70.42    2.05   0
  -3   5  15   21.57    1.86   0
  -3   6  17    2.38    1.78   0
  -3   7  18   -2.96    2.07   0
  -2   3  13  115.33    2.23   0
  -2   4  16   -0.43    1.84   0
  -2   5  18   47.84    1.92   0
  -2   6  19    2.28    2.10   0
  -2   7 -12    4.14    2.70   0
  -2   8 -13    9.04    2.76   0
  -2   9 -14   19.56    2.38   0
  -1   1   9 3187.50    7.90   0
  -1   2  13  636.72    3.48   0
  -1   3  -8   42.95    2.74   0
  -1   3  16  107.23    2.30   0
  -1   4 -10   -0.84    2.75   0
  -1   4  18    4.47    1.93   0
  -1   5  20   16.65    2.84   0
  -1   6 -13   34.00    2.85   0
  -1   7 -14   34.22    2.69   0
  -1   8 -15   -0.48    2.58   0
  -1   9 -16   -3.16    2.07   0
   0   0   7    1.23    1.65   0
   0   0   8  362.87    3.57   0
   0   1  13  129.39    2.80   0
   0   2  16    3.13    2.47   0
   0   3  18   94.48    2.37   0
   0   4 -12   18.10    2.65   0
   0   4  20   26.06    2.87   0
   0   5  21    1.13    2.12   0
   0   6 -15   14.10    1.87   0
   0   7 -16  137.06    2.68   0
   1   0  -4    1.41    2.62   0
   1   0  11 1544.81    6.02   0
   1   1  15    0.21    2.54   0
   1   2 -10  194.01    3.17   0
   1   2  17   -0.47    1.73   0
   1   3 -12   45.36    2.64   0
   1   3  19   40.45    2.00   0
   1   4 -14  191.72    2.67   0
   1   4  21   33.09    2.81   0
   1   7 -17  186.80    3.22   0
   1   8 -18    5.76    2.06   0
   2  -1   8  157.72    2.93   0
   2   0  13    7.95    1.98   0
   2   1  16   27.23    1.87   0
   2   2  18   19.28    2.09   0
   2   3  20   41.42    2.15   0
   2   4 -15   20.09    2.07   0
   3  -1  -4    1.52    1.66   0
   3  -1  10  212.58    3.17   0
   3   0  -8  122.45    2.19   0
   3   0  14    0.51    1.67   0
   3   1  17    5.10    2.41   0
   3   2 -13  127.95    2.29   0
   3   2  19   -2.99    2.71   0
   3   4 -16   -0.68    1.82   0
   3   5 -17   73.48    2.98   0
   3   6 -18    6.02    2.68   0
   3   7 -19   -3.82    2.50   0
   4   0  -9    1.49    2.08   0
   4   1  17    4.69    1.90   0
   4   2  19    1.99    2.03   0
   4   3 -15    8.55    2.60   0
   4   5 -18   34.95    2.16   0
   4   6 -19    6.36    2.12   0
   5  -1  -6   40.18    2.22   0
   5  -1  11   10.62    2.62   0
   5   1 -12   36.21    2.06   0
   5   1  17   -0.95    2.02   0
   5   2 -14   29.92    1.98   0
   5   4 -17   10.80    2.02   0
   6  -1  -6   14.02    1.97   0
   6   1 -12   37.06    2.15   0
   6   2 -14   -1.90    1.97   0
   6   3 -16   15.94    2.05   0
   6   4 -17   22.68    2.60   0
   7  -1  -5    3.99    2.59   0
   7   0  -9   -1.52    2.44   0
   7   1 -12   -0.48    2.14   0
   7   2 -14    6.74    1.87   0
   7   3 -16   -1.29    2.06   0
   8  -1  -4   24.44    1.87   0
   8   0  -8   48.32    2.94   0
   8   1 -11   34.65    2.52   0
   8   3 -15   21.38    2.75   0
   9  -1   0    6.46    1.97   0
   9  -1   1   10.91    2.08   0
   9  -1   2   20.45    2.30   0
   9   0  -7   47.96    2.41   0
   9   1 -10   33.70    2.76   0
  10   0  -4   10.97    2.08   0
  -6   9   5    2.65    2.89   0
  -6   9   7    2.13    2.71   0
  -6  10   1   20.41    3.25   0
  -6  10   9    4.49    2.46   0
  -6  10  10    1.32    2.30   0
  -6  10  11   11.86    3.45   0
  -6  11  -1    2.77    2.82   0
  -5   7   0    4.95    2.91   0
  -5   7  11    0.83    2.00   0
  -5   8  13   11.04    2.12   0
  -5   8  14   38.32    3.22   0
  -5   9  15   23.52    2.49   0
  -4   5  -1 1170.96    8.92   0
  -4   5  11    0.51    1.82   0
  -4   6  14    5.90    1.97   0
  -4   6  15   13.29    2.44   0
  -4   7  16   64.98    2.42   0
  -3   3   1  130.28    2.82   0
  -3   3   9  109.70    2.23   0
  -3   3  10   -2.93    2.52   0
  -3   4  13   90.61    2.23   0
  -3   4  14    3.37    2.39   0
  -3   5  16   61.17    2.21   0
  -3   6  18   -3.44    2.00   0
  -3   7  19   -3.60    2.04   0
  -3  10 -12   23.71    3.03   0
  -2   2  -1  489.58    8.64   0
  -2   2  11  680.76    4.29   0
  -2   3  14   36.51    1.85   0
  -2   4  17   31.53    1.99   0
  -2   5  -9  301.82    4.13   0
  -2   5  19   13.20    2.74   0
  -1   1  10   65.41    1.92   0
  -1   2  14   45.24    1.99   0
  -1   3  17   47.31    1.98   0
  -1   4  19   -0.04    1.83   0
  -1  10 -16   -3.52    3.21   0
   0   0   9   35.10    2.34   0
   0   1  -5 1048.75    6.44   0
   0   1  14   68.17    2.67   0
   0   2  -8  129.05    2.35   0
   0   3 -10   20.74    1.93   0
   0   3  19   73.45    2.69   0
   0   9 -17   -1.41    2.20   0
   1   0  12   -3.05    1.85   0
   1   2  18    9.99    1.95   0
   1   3  20   31.74    2.26   0
   1   6 -16   11.22    2.00   0
   2  -1  -1 2780.22   12.32   0
   2  -1   9  211.05    3.50   0
   2   0  -6  649.50    4.10   0
   2   0  14  118.95    2.98   0
   2   1  -9 3144.58    7.64   0
   2   1  17    6.82    2.29   0
   2   2 -11  743.04    4.49   0
   2   2  19   34.98    2.16   0
   2   3 -13  125.60    2.38   0
   2   3  21    1.57    2.65   0
   2   5 -16   -1.19    1.78   0
   2   6 -17   21.29    2.07   0
   2   7 -18   16.75    2.17   0
   3   1 -10  206.63    2.56   0
   3   2 -12  689.37    4.16   0
   3   3 -14   27.67    1.98   0
   4   0  -8  268.25    3.29   0
   4   0  15    3.52    1.77   0
   4   1 -11  592.32    3.57   0
   4   2 -13  268.40    2.88   0
   4   4 -16    3.86    2.11   0
   4   5 -17    3.95    2.67   0
   4   6 -18   -2.43    2.77   0
   5  -1  -5  472.62    3.73   0
   5   0  -9  229.58    2.69   0
   5   0  15  199.95    3.68   0
   5   1 -11  110.56    2.84   0
   5   2 -13  228.48    3.18   0
   5   3 -15  182.60    2.60   0
   6  -1  -5  146.02    2.44   0
   6  -1  11   48.20    3.18   0
   6   0  -9    9.42    2.28   0
   6   1 -11  139.62    3.02   0
   6   3 -15    1.96    1.93   0
   6   5 -18    0.56    2.26   0
   7  -1  -4   15.25    2.68   0
   7   0  -8    4.52    2.43   0
   7   1 -11   12.54    1.84   0
   7   2 -13   16.09    2.45   0
   7   3 -15    1.68    2.19   0
   8  -1  -3   19.47    1.89   0
   8  -1  -2   -2.86    2.43   0
   8  -1   7   10.56    3.60   0
   8   0  -7    2.74    2.79   0
   8   1 -10    5.61    2.76   0
   8   2 -13   -0.61    2.14   0
   9   0  -6   -2.24    1.93   0
   9   1  -9   -0.62    2.52   0
   9   2 -12    5.32    2.23   0
  10   0  -3   -0.60    2.08   0
  10   0  -2   15.18    2.61   0
  -6   9   3    2.92    3.20   0
  -6   9   8   -1.45    2.23   0
  -6   9   9    0.37    2.26   0
  -6   9  10   -0.86    3.29   0
  -6  10   0   -1.39    2.81   0
  -5   6   3   28.79    2.55   0
  -5   6   5   22.80    2.04   0
  -5   6   8   19.25    2.10   0
  -5   6   9   89.58    2.93   0
  -5   7  12   10.29    2.02   0
  -5   7  13   24.45    2.12   0
  -5   8  -3    0.55    3.05   0
  -5   8  15   12.31    2.11   0
  -4   4   4  677.40    5.31   0
  -4   4   5   19.75    2.10   0
  -4   4   6   61.70    2.36   0
  -4   4   7    1.46    1.82   0
  -4   4   8  443.47    3.77   0
  -4   5  13    1.89    1.70   0
  -4   6  16    2.70    2.31   0
  -4   7  17   14.32    2.12   0
  -4   7  18   10.43    2.60   0
  -4   8  -7    3.73    3.64   0
  -4  10  -9    7.16    3.36   0
  -3   3  11  172.44    2.47   0
  -3   4  15   15.82    2.61   0
  -3   5  17   51.71    2.16   0
  -3   6  19    2.18    1.92   0
  -3   7  -9  207.16    4.24   0
  -3   8 -10   20.92    2.63   0
  -3   9 -11   40.77    3.12   0
  -2   2  12  640.03    3.64   0
  -2   3  15    6.89    1.75   0
  -2   4  -7    2.85    1.68   0
  -2   4  18    5.74    2.57   0
  -2   5  20   32.30    2.43   0
  -2  10 -14    3.06    2.12   0
  -1   1  11   12.55    1.78   0
  -1   1  12   14.55    2.62   0
  -1   2  -5  395.05    4.69   0
  -1   2  15   11.92    1.91   0
  -1   3  18  125.85    2.54   0
  -1   4  20   13.26    2.76   0
  -1   5 -11  554.45    4.29   0
  -1   5  21   -0.07    1.97   0
  -1   9 -15   66.40    3.12   0
   0   0  10 1441.87    5.48   0
   0   2  17    0.98    1.79   0
   0   4  21   27.15    2.09   0
   0   5 -13   -0.05    1.87   0
   0   6 -14    9.87    1.81   0
   0   7 -15   64.70    2.40   0
   0   8 -16    2.89    1.98   0
   1   0  13  139.99    2.89   0
   1   1  -7  744.28    4.38   0
   1   1  16   64.59    1.99   0
   1   2  19   31.26    2.32   0
   1   3  21   12.80    2.40   0
   1   4 -13   58.73    2.15   0
   1   5 -14  102.09    3.05   0
   1   8 -17   -6.62    3.01   0
   2  -1  10  480.28    4.34   0
   2   4 -14  149.55    2.46   0
   2   8 -18   -2.46    2.52   0
   3  -1  -3   60.76    2.06   0
   3  -1  11  193.67    2.97   0
   3   0  -7   20.25    1.65   0
   3   0  15   68.65    2.23   0
   3   1  18   64.41    2.22   0
   3   2  20    1.98    1.99   0
   3   4 -15   14.55    2.01   0
   3   5 -16   67.06    2.65   0
   3   6 -17    8.09    2.55   0
   3   7 -18   -3.94    2.14   0
   4  -1  -4  161.71    2.83   0
   4  -1  12   48.38    2.85   0
   4   1 -10   33.32    2.59   0
   4   1  18    4.06    1.97   0
   4   3 -14  246.28    2.64   0
   5  -1  -4    2.56    2.68   0
   5  -1  12   61.75    2.98   0
   5   0  -8   -2.47    1.89   0
   5   1  18   17.81    2.04   0
   5   4 -16   65.07    2.24   0
   5   5 -17    0.87    2.06   0
   5   6 -18   17.88    2.10   0
   6  -1  -4  119.33    2.97   0
   6   0  -8  529.47    3.53   0
   6   0  15    3.20    2.61   0
   6   2 -13   34.15    1.85   0
   6   4 -16    8.33    1.99   0
   6   5 -17   18.31    2.16   0
   7  -1  -3   -1.40    2.64   0
   7  -1  10    7.92    4.26   0
   7   0  14    0.42    2.76   0
   7   3 -14   17.75    2.55   0
   7   4 -16   21.82    2.16   0
   8  -1  -1   37.27    2.47   0
   8   0  -6   94.97    3.07   0
   8   2 -12   35.97    2.27   0
   8   3 -14    1.37    2.08   0
   9   0  -5    2.39    1.92   0
   9   0  -4    0.60    2.56   0
   9   1  -8   58.77    3.05   0
   9   2 -11   33.63    2.19   0
  10   0  -1    1.18    2.13   0
  10   0   0   90.38    3.38   0
  10   0   1    0.26    3.11   0
  10   1  -6    4.93    2.74   0
  -6   8   6    6.57    3.03   0
  -6   8   8    7.66    2.90   0
  -6   8   9    3.25    2.60   0
  -6   9   2    3.89    2.20   0
  -6   9  11    1.20    2.33   0
  -6   9  12    2.76    2.21   0
  -6   9  13    3.16    2.82   0
  -5   6   2   35.32    2.83   0
  -5   6  10    8.17    1.83   0
  -5   6  11   -0.46    1.81   0
  -5   6  12   17.84    2.28   0
  -5   7  -1    1.91    2.68   0
  -5   7  14   27.81    2.10   0
  -5   7  15   30.10    2.64   0
  -5   8  16   -5.85    2.19   0
  -4   4   9    2.44    1.90   0
  -4   4  10  250.35    2.83   0
  -4   4  11    0.83    2.48   0
  -4   5  14   12.52    1.82   0
  -4   5  15   50.38    2.61   0
  -4   6  -4   64.97    6.40   0
  -4   6  17    5.89    2.09   0
  -4   9  -8   98.11    4.70   0
  -3   3   0    3.04    1.61   0
  -3   3  12    5.07    1.88   0
  -3   3  13   13.98    2.46   0
  -3   4  16   -2.45    1.68   0
  -3   5  18   32.08    2.07   0
  -3   6  20    6.29    2.12   0
  -3  11 -12    3.14    2.85   0
  -2   2  13   17.49    1.89   0
  -2   3  16    7.73    1.72   0
  -2   4  19    2.46    2.51   0
  -2   6 -10    7.92    2.35   0
  -2   9 -13   -2.33    2.20   0
  -1   1  13    5.46    2.44   0
  -1   2  16  272.51    2.90   0
  -1   3  19   71.55    2.79   0
  -1   4  21   40.05    2.64   0
  -1   6 -12   74.19    2.85   0
  -1   7 -13  129.92    3.12   0
  -1   8 -14   20.01    2.16   0
   0   0  11   -0.10    1.77   0
   0   1  15   93.75    2.09   0
   0   2  18   24.37    2.00   0
   0   3  20    1.14    1.99   0
   0   4 -11  110.95    2.39   0
   0   9 -16   11.60    2.79   0
   1  -1   5  505.98    5.32   0
   1  -1   6 1303.09    7.22   0
   1   0  14    4.33    2.40   0
   1   1  17  109.14    2.13   0
   1   2  -9 1215.60    5.20   0
   1   3 -11  143.60    2.54   0
   1   6 -15   60.44    2.05   0
   1   7 -16   -2.84    2.02   0
   2   0  -5  399.32    3.70   0
   2   0  15   17.53    1.96   0
   2   1  -8 1676.97    5.60   0
   2   1  18    3.45    1.99   0
   2   2 -10  536.97    3.98   0
   2   2  20    3.67    2.04   0
   2   3 -12   32.57    1.95   0
   2   5 -15   41.88    1.99   0
   2   6 -16    3.88    2.08   0
   2   7 -17   -1.90    1.99   0
   3  -1  12    2.89    2.57   0
   3   0  16    3.57    2.44   0
   3   1  -9  806.96    4.00   0
   3   2 -11   12.17    2.66   0
   3   3 -13   16.45    1.88   0
   4   0  -7    2.18    1.72   0
   4   0  16  127.48    2.79   0
   4   1  19   10.27    2.40   0
   4   2 -12  439.06    3.13   0
   4   4 -15   78.67    2.08   0
   4   5 -16   54.02    2.17   0
   4   6 -17    9.07    2.64   0
   4   7 -18   12.47    2.19   0
   5   0  16    1.08    2.83   0
   5   1 -10   81.13    2.22   0
   5   2 -12   46.15    1.96   0
   5   3 -14    6.76    1.82   0
   5   4 -15    8.38    2.51   0
   6  -1  -3  235.18    3.49   0
   6   0  -7    7.53    2.52   0
   6   1 -10   39.75    2.12   0
   6   2 -12  115.72    2.31   0
   6   3 -14    3.56    1.96   0
   6   4 -15   10.56    2.64   0
   7  -1  -2   50.52    2.88   0
   7   0  -7   44.58    2.10   0
   7   2 -12    1.07    1.99   0
   7   4 -15   55.80    2.40   0
   7   5 -16    9.75    3.10   0
   8  -1   0    5.90    1.82   0
   8  -1   1   16.00    2.61   0
   8  -1   6   11.96    3.42   0
   8   1  -9   50.42    2.18   0
   8   2 -11   18.56    1.96   0
   8   3 -13    6.51    2.18   0
   9   0  -3    1.11    2.60   0
   9   1  -7   12.17    3.00   0
   9   2 -10    3.22    1.98   0
  10   0   2   23.60    2.65   0
  10   1  -5   50.02    2.40   0
  -6   8   4   10.62    2.03   0
  -6   8  10   -1.12    1.91   0
  -6   8  12   -0.09    3.09   0
  -6   9   1    3.02    3.07   0
  -6  10  -1   15.77    2.92   0
  -6  11  -2    2.52    3.00   0
  -5   6  13   29.02    2.11   0
  -5   7  16    1.92    2.15   0
  -4   4   2  320.44    3.70   0
  -4   4  12    8.13    1.99   0
  -4   4  13   13.86    2.40   0
  -4   5  16   49.95    2.09   0
  -4   6  18    2.36    2.09   0
  -3   3  14   23.34    1.86   0
  -3   5  19   32.30    2.22   0
  -2   1   6  995.91    5.35   0
  -2   1   7  330.93    3.34   0
  -2   1   8 1586.74    5.80   0
  -2   2  14  108.68    2.14   0
  -2   3  17   91.37    2.13   0
  -2   4  20    3.24    2.85   0
  -2   5  21    1.64    2.12   0
  -2   7 -11   40.91    2.23   0
  -2   8 -12  107.24    2.55   0
  -1   1  14    5.39    2.44   0
  -1   2  17    5.98    1.87   0
  -1   3  -7 1800.86    7.70   0
  -1   3  20   11.79    2.48   0
  -1   4  -9  149.51    2.68   0
  -1  10 -15   -2.06    2.58   0
   0   0  12 1407.45    5.57   0
   0   1  16    6.24    1.91   0
   0   2  -7 1310.89    5.96   0
   0   2  19  107.70    2.36   0
   0   3  -9  130.98    2.34   0
   0   3  21    3.22    1.93   0
   0   5 -12  193.91    3.14   0
   0   8 -15   -0.30    2.52   0
   1  -1   4 1808.81   11.07   0
   1  -1   7  209.65    3.04   0
   1  -1   8  291.27    3.54   0
   1   0  -3   44.06    2.11   0
   1   1  -6  214.95    3.41   0
   1   1  18    1.79    2.77   0
   1   2  20   14.29    2.02   0
   1   4 -12  173.67    2.58   0
   1   9 -17   21.00    2.13   0
   2  -1   0 1081.47    9.11   0
   2  -1  11  322.24    3.35   0
   2   0  16  265.96    3.48   0
   2   1  19   17.60    2.36   0
   2   2  21    2.20    2.02   0
   2   4 -13  186.36    2.54   0
   2   8 -17   -0.07    2.51   0
   3  -1  -2    8.00    1.78   0
   3   0  -6    0.14    1.41   0
   3   1  19   22.26    2.16   0
   3   4 -14    8.63    1.81   0
   3   5 -15   37.00    1.88   0
   3   6 -16   -0.89    2.49   0
   3   7 -17   57.67    2.31   0
   3   8 -18    6.97    1.98   0
   4  -1  -3   24.96    1.80   0
   4  -1  13    5.92    2.36   0
   4   0  17    0.87    2.25   0
   4   1  -9   51.15    2.84   0
   4   2 -11    1.27    2.51   0
   4   3 -13  439.27    3.30   0
   5  -1  -3   33.58    2.05   0
   5  -1  13   14.21    2.37   0
   5   0  -7  781.79    4.12   0
   5   3 -13  133.43    2.68   0
   5   5 -16   69.01    2.20   0
   5   6 -17    1.39    2.09   0
   6  -1  12   11.08    2.83   0
   6   0  16    1.65    2.40   0
   6   1  -9  623.02    4.25   0
   6   3 -13   14.15    1.98   0
   6   5 -16   13.67    2.22   0
   6   6 -17   -4.49    2.18   0
   7  -1  -1   56.11    3.02   0
   7   0  -6    0.85    1.95   0
   7   1  -9   14.12    2.03   0
   7   2 -11   26.42    2.03   0
   7   3 -13   24.98    1.94   0
   7   4 -14    3.24    2.72   0
   8  -1   2    5.26    1.94   0
   8  -1   3  141.46    3.71   0
   8  -1   4   25.68    3.08   0
   8  -1   5   28.55    3.03   0
   8   0  -5   -1.33    1.72   0
   8   1  -8   17.17    2.11   0
   8   2 -10   35.54    2.67   0
   8   3 -12    1.45    2.67   0
   8   4 -14   21.45    2.13   0
   9   0  -2    3.32    2.25   0
   9   2  -9   23.30    2.33   0
   9   3 -11   -0.94    2.48   0
  10   1  -4   -4.76    2.18   0
  -6   7   7    4.20    2.27   0
  -6   7   8   18.92    2.77   0
  -6   7   9   10.70    2.94   0
  -6   7  10    4.15    2.56   0
  -6   8  13   33.85    2.43   0
  -6   8  14   -3.65    2.98   0
  -6   9   0    8.11    2.68   0
  -5   5   5  140.28    3.20   0
  -5   5   6  480.38    3.88   0
  -5   5   7  336.73    3.43   0
  -5   5   8   23.69    2.05   0
  -5   5   9   81.98    2.35   0
  -5   5  10   38.50    2.02   0
  -5   5  11    1.28    2.39   0
  -5   6   1    1.27    1.92   0
  -5   6  14  139.59    2.66   0
  -5   6  15   20.19    1.98   0
  -5   7  17   20.29    2.35   0
  -4   4   1   23.58    2.60   0
  -4   4  14   93.21    2.28   0
  -4   5  -2   27.89    3.93   0
  -4   5  17   18.88    1.87   0
  -4   6  19    5.85    2.17   0
  -3   2   5  139.62    2.39   0
  -3   2   6  775.12    4.27   0
  -3   2   7    4.51    1.70   0
  -3   2   8   43.92    1.85   0
  -3   2   9   78.05    2.06   0
  -3   2  10    4.41    1.95   0
  -3   3  15    4.86    1.77   0
  -3   4  18   10.24    2.01   0
  -3   5  20    4.95    2.11   0
  -3  10 -11    7.06    2.89   0
  -2   1   4  622.36    4.86   0
  -2   1   5   87.68    2.34   0
  -2   1   9 2825.03    7.34   0
  -2   1  10  777.13    4.04   0
  -2   1  11  131.99    2.83   0
  -2   2  15   22.16    1.88   0
  -2   2  16   86.02    2.72   0
  -2   3  18   61.13    2.25   0
  -2   4  21   20.20    2.79   0
  -2   5  -8   87.83    3.17   0
  -2  10 -13    7.67    2.84   0
  -1   0   6    2.64    2.36   0
  -1   0   7  960.00    5.09   0
  -1   0   8  144.59    2.79   0
  -1   1  15   59.51    1.94   0
  -1   5 -10  272.28    3.57   0
  -1   9 -14    1.41    2.32   0
   0   0  13   -0.85    1.80   0
   0   1  -4 3078.40   11.66   0
   0   1  17    7.55    1.78   0
   0   2  20   75.12    3.04   0
   0   3  22   14.67    2.29   0
   0   6 -13    0.80    1.98   0
   0   7 -14  139.96    2.44   0
   0  10 -16    1.66    2.06   0
   1  -1   9 1032.54    5.51   0
   1  -1  10    0.76    2.40   0
   1   0  15  193.42    2.67   0
   1   2  -8   90.73    2.59   0
   1   2  21   22.43    2.07   0
   1   3 -10  127.44    2.38   0
   1   5 -13  434.54    3.24   0
   1   6 -14  332.83    2.99   0
   1   7 -15   14.32    2.06   0
   1   8 -16   -2.39    1.87   0
   2  -1  12  328.95    3.30   0
   2   1  -7  364.65    3.36   0
   2   3 -11 1232.08    5.16   0
   2   5 -14   14.20    1.85   0
   2   6 -15  217.20    2.64   0
   2   7 -16   16.98    2.17   0
   3  -1  13   36.55    2.10   0
   3   0  17  274.97    3.30   0
   3   1  -8    9.04    1.62   0
   3   1  20   13.14    2.68   0
   3   2 -10    6.63    2.71   0
   3   3 -12    0.62    1.96   0
   4  -1  -2 1174.40    5.98   0
   4   0  -6  518.21    3.55   0
   4   4 -14  104.62    2.29   0
   4   5 -15   73.03    2.27   0
   4   6 -16    0.46    1.70   0
   4   7 -17   30.23    2.10   0
   5   0  -6   -0.20    2.57   0
   5   0  17    1.66    2.82   0
   5   1  -9   12.71    1.87   0
   5   2 -11  456.90    3.22   0
   5   4 -14    4.47    1.91   0
   5   5 -15   27.45    2.75   0
   5   6 -16   -2.39    2.70   0
   5   7 -17   35.56    2.63   0
   6  -1  -2   19.06    1.84   0
   6   0  -6  256.55    2.89   0
   6   2 -11   29.41    1.96   0
   6   4 -14   60.43    2.12   0
   6   5 -15    4.09    2.55   0
   6   6 -16   -5.58    2.85   0
   7  -1   0   -0.30    2.71   0
   7   0  -5   44.41    2.53   0
   7   1  -8  154.67    2.37   0
   7   2 -10   71.45    2.60   0
   7   3 -12    4.93    1.98   0
   7   5 -15    5.91    2.12   0
   8   0  -4    2.69    1.72   0
   8   1  -7   70.38    2.39   0
   8   4 -13   11.36    2.05   0
   9   0  -1    5.81    1.90   0
   9   1  -5   14.04    2.69   0
   9   2  -8   -7.09    3.04   0
   9   3 -10    0.61    2.81   0
  10   1  -3   21.38    2.29   0
  10   2  -6    1.02    3.10   0
  -7  10   6   -0.86    3.22   0
  -7  10   7    2.01    3.87   0
  -7  10   8   -1.80    2.82   0
  -6   7   5   35.27    2.95   0
  -6   7   6  101.13    2.58   0
  -6   7  11    3.10    2.00   0
  -6   7  12   -0.96    1.96   0
  -6   7  13   -4.73    2.98   0
  -6   8   2    0.15    1.96   0
  -6   8  15    5.22    2.38   0
  -5   5   4  152.26    2.72   0
  -5   5  12   65.19    2.24   0
  -5   5  13  133.48    2.26   0
  -5   5  14   17.81    2.59   0
  -5   6  16    1.00    2.02   0
  -5   6  17   -5.05    2.94   0
  -5   7  -2   46.32    3.70   0
  -4   3   6  119.58    3.16   0
  -4   3   7   30.81    2.05   0
  -4   3   8   25.13    1.87   0
  -4   3  10  112.81    2.42   0
  -4   3  11  191.02    3.07   0
  -4   4  15   68.34    2.01   0
  -4   4  16    2.66    2.70   0
  -4   5  18   21.29    2.02   0
  -3   2  11   12.56    1.93   0
  -3   2  12  577.67    3.52   0
  -3   2  13  124.92    2.69   0
  -3   3  17   -3.78    2.48   0
  -3   4  19    6.50    2.04   0
  -3   6  -7    8.31    2.52   0
  -2   1   3 6980.44   15.52   0
  -2   1  12   96.01    2.24   0
  -2   2  17   42.44    2.54   0
  -2   3  19   16.40    1.87   0
  -2   3  20   12.86    2.43   0
  -2   9 -12   -1.36    2.78   0
  -1   0   5 1636.00    7.06   0
  -1   0   9  179.09    2.33   0
  -1   0  10   -0.14    1.57   0
  -1   0  11 4014.98    8.83   0
  -1   1  16   74.79    2.14   0
  -1   2  19    8.01    1.99   0
  -1   3  21   17.82    2.02   0
  -1   6 -11  123.00    2.96   0
  -1   7 -12  324.74    3.75   0
  -1   8 -13    5.28    1.82   0
   0   0  14  151.40    2.42   0
   0   1  18   -1.83    1.79   0
   0   2  21    1.43    2.47   0
   0   4 -10   66.83    2.28   0
   0   9 -15    8.83    2.12   0
   1  -1   3    8.82    2.54   0
   1  -1  11  796.83    4.98   0
   1   0  16    2.53    1.77   0
   1   1  19   12.16    1.98   0
   1   2  22    1.77    2.70   0
   1   9 -16   -5.22    2.07   0
   2  -1  13   15.47    1.94   0
   2   0  -4 4953.54   11.63   0
   2   0  17    2.00    1.78   0
   2   1  20   35.27    2.23   0
   2   2  -9  740.38    3.87   0
   2   4 -12  357.24    3.53   0
   2   8 -16   -2.80    2.65   0
   2   9 -17    3.65    2.12   0
   3  -1  -1  239.03    3.75   0
   3  -1  14   73.09    2.30   0
   3   0  18    3.26    2.57   0
   3   4 -13   97.06    2.28   0
   3   5 -14   12.66    1.78   0
   3   6 -15    5.24    2.32   0
   3   7 -16   28.42    1.92   0
   3   8 -17   13.01    1.91   0
   4  -1  14    2.99    1.73   0
   4   0  18   12.42    2.81   0
   4   1  -8  188.22    2.59   0
   4   2 -10  384.15    3.35   0
   4   3 -12   25.74    1.85   0
   4   4 -13   14.37    2.51   0
   4   8 -17   -0.40    2.54   0
   5  -1  -2   13.04    1.96   0
   5  -1  14   18.65    2.59   0
   5   1  -8  442.31    3.58   0
   5   2 -10  144.38    3.01   0
   5   3 -12  132.90    2.36   0
   6  -1  -1  290.17    3.74   0
   6   1  -8  136.51    2.34   0
   6   2 -10  204.87    2.60   0
   6   3 -12   30.20    1.89   0
   7  -1   1    1.42    2.56   0
   7   0  -4    1.70    2.65   0
   7   1  -7   24.60    2.78   0
   7   4 -13   25.63    1.98   0
   7   5 -14    9.87    2.86   0
   8   0  -3    0.71    1.80   0
   8   1  -6   -3.43    2.57   0
   8   2  -9   36.37    2.08   0
   8   3 -11   17.80    2.21   0
   8   4 -12    6.57    2.89   0
   9   0   0   -2.23    1.89   0
   9   0   1  133.42    3.56   0
   9   2  -7    4.31    2.79   0
  10   1  -2    1.85    2.25   0
  10   1  -1   -2.00    2.89   0
  10   2  -5   -0.47    3.04   0
  -7   9   8    2.32    2.88   0
  -7   9   9    9.40    3.41   0
  -7   9  10    1.43    3.37   0
  -7  10   5    3.92    3.49   0
  -6   7  14   28.17    2.39   0
  -6   7  15    3.72    3.09   0
  -6   8   1   24.87    2.96   0
  -6  10  -2    9.56    3.61   0
  -5   5   3  447.38    4.11   0
  -5   5  15   17.41    2.05   0
  -5   6   0   50.58    2.39   0
  -5   6  18   15.01    2.15   0
  -4   3   5  219.11    2.90   0
  -4   3  12   19.02    1.90   0
  -4   4  17   13.49    2.05   0
  -4   5  19   -1.52    2.04   0
  -4   5  20   -2.92    2.96   0
  -4  11  -9    3.40    2.82   0
  -3   2   3   21.17    1.62   0
  -3   2  14   17.16    1.93   0
  -3   3  -1   28.25    2.62   0
  -3   3  18   80.77    2.23   0
  -3   4  20   -1.73    2.09   0
  -3   7  -8   52.60    3.68   0
  -3   8  -9    0.06    2.63   0
  -3   9 -10    4.61    2.51   0
  -2   1  13   39.11    1.95   0
  -2   1  14   48.74    1.94   0
  -2   2  18   73.79    2.24   0
  -2   3  21    2.45    2.32   0
  -2   4  -6  482.86    5.49   0
  -2   6  -9    0.97    2.60   0
  -2   8 -11   29.14    2.63   0
  -2  11 -13    1.36    2.04   0
  -1   0   4    2.40    1.97   0
  -1   0  12    0.71    2.08   0
  -1   1  17    6.27    1.97   0
  -1   3  22   35.51    2.35   0
  -1   4  -8   20.27    2.53   0
  -1  10 -14    5.11    1.95   0
   0   0  15   -1.59    1.71   0
   0   0  16   29.15    2.39   0
   0   2  -6  611.56    4.83   0
   0   3  -8 1231.52    5.58   0
   0   5 -11   26.99    1.88   0
   0   7 -13    0.37    2.41   0
   0   8 -14   90.67    2.48   0
   0  10 -15   -0.56    2.71   0
   1  -1  12  181.64    2.65   0
   1   0  17   44.62    1.88   0
   1   1  20   42.02    2.37   0
   1   4 -11  180.09    2.58   0
   1   5 -12  113.69    2.94   0
   1   7 -14   19.04    2.50   0
   1   8 -15   -0.91    2.06   0
   1  10 -16    2.80    2.75   0
   2  -1  14   64.48    2.22   0
   2   0  18    1.06    1.91   0
   2   1  21    3.56    2.66   0
   2   5 -13  104.32    2.29   0
   2   6 -14   64.16    2.13   0
   2   7 -15    8.19    2.05   0
   3  -1  15   24.06    2.46   0
   3   1  -7   38.74    2.37   0
   3   2  -9   81.94    2.70   0
   3   3 -11  202.53    2.50   0
   3   9 -17    1.24    2.13   0
   4  -1  15   77.34    2.94   0
   4   0  -5    1.35    1.88   0
   4   5 -14   22.21    1.79   0
   4   6 -15   10.12    1.85   0
   4   7 -16   79.53    2.45   0
   5  -1  -1    2.49    2.65   0
   5   0  -5  121.75    2.60   0
   5   0  18    1.56    1.98   0
   5   4 -13   -2.16    1.87   0
   5   5 -14   22.73    2.05   0
   5   6 -15   14.18    1.90   0
   5   7 -16    4.59    2.07   0
   6  -1  13    8.68    2.50   0
   6   3 -11  150.86    2.98   0
   6   4 -13   72.68    2.29   0
   6   5 -14   13.05    1.76   0
   6   6 -15   93.49    2.50   0
   6   7 -16   32.39    2.30   0
   7  -1   2  209.99    4.03   0
   7  -1  11   15.28    4.70   0
   7   2  -9   23.51    1.93   0
   7   3 -11   32.29    2.12   0
   7   4 -12   38.29    2.71   0
   7   6 -15   -1.80    2.28   0
   8   0  -2   25.52    1.95   0
   8   2  -8   28.48    2.18   0
   8   3 -10    4.16    1.93   0
   8   5 -13    6.14    2.06   0
   9   0   2    5.11    2.95   0
   9   1  -4  170.15    2.84   0
   9   3  -9    4.07    1.99   0
  10   1   0    5.19    2.55   0
  10   2  -4    7.49    2.94   0
  -7   9   6   -1.83    3.16   0
  -7   9   7   -1.00    2.55   0
  -6   6   6    1.00    2.39   0
  -6   6   7   51.08    2.40   0
  -6   6   8    8.96    1.92   0
  -6   6   9   24.24    1.97   0
  -6   6  10   17.91    2.06   0
  -6   6  12   11.58    2.02   0
  -6   6  13   16.26    2.01   0
  -6   6  14   15.12    2.59   0
  -6   7   3   19.92    2.26   0
  -6   7  16   19.09    2.53   0
  -6   9  -1    1.14    3.00   0
  -6  11  -3    5.47    3.39   0
  -5   4   7   92.88    2.35   0
  -5   4   8   47.35    2.16   0
  -5   4   9  338.17    3.15   0
  -5   4  10  155.49    2.67   0
  -5   4  11  239.21    2.85   0
  -5   4  12    8.32    1.95   0
  -5   4  13    2.80    2.43   0
  -5   5   2   12.45    2.85   0
  -5   5  16   50.02    2.11   0
  -5   5  17    3.86    2.08   0
  -4   3   4 1491.34    6.32   0
  -4   3  14  201.06    2.55   0
  -4   3  15    7.68    1.85   0
  -4   4   0  328.08    4.63   0
  -4   4  19    0.71    2.60   0
  -3   2  15    5.11    1.71   0
  -3   2  16   17.70    2.61   0
  -3   3  19  111.47    2.27   0
  -3   4  21   12.51    2.16   0
  -3  11 -11    2.72    2.36   0
  -2   1  15   90.79    2.24   0
  -2   2  19   14.46    1.94   0
  -2   3  -4 1093.63   10.60   0
  -2   3  22   -0.21    2.62   0
  -2   7 -10    8.98    2.21   0
  -1   0  13  115.70    2.14   0
  -1   0  14   -7.05    2.44   0
  -1   1  18  323.18    2.99   0
  -1   2  -4  101.88    3.52   0
  -1   2  21   30.63    2.16   0
  -1   9 -13   11.63    2.46   0
  -1  11 -14    1.02    2.79   0
   0  -1   8 2421.29    7.68   0
   0  -1   9    8.00    2.17   0
   0   0  17    1.79    2.32   0
   0   1  20   23.99    1.91   0
   0   2  22   12.55    1.93   0
   1  -1  13  130.83    2.32   0
   1  -1  14  256.66    3.18   0
   1   0  -2    3.71    1.54   0
   1   0  18    1.47    1.89   0
   1   1  -5 2424.19    8.34   0
   1   1  21    2.26    1.95   0
   1   3  -9 1424.05    5.37   0
   1   6 -13  110.84    2.40   0
   1   9 -15   94.68    2.99   0
   2  -1  15    3.86    1.84   0
   2   0  19    2.32    2.46   0
   2   1  -6 1065.40    5.04   0
   2   2  -8  111.43    3.62   0
   2   3 -10   68.32    2.16   0
   2   9 -16   16.05    2.04   0
   3   0  -4    1.38    2.26   0
   3   0  19   10.76    1.96   0
   3   4 -12   81.25    2.15   0
   3   5 -13   20.81    2.41   0
   3   6 -14    1.85    2.38   0
   3   7 -15   61.80    2.22   0
   3   8 -16   10.53    1.89   0
   4  -1  -1  205.91    2.99   0
   4   0  19    4.95    1.91   0
   4   1  -7  536.85    3.51   0
   4   2  -9  474.64    3.70   0
   4   3 -11  220.05    2.55   0
   4   4 -12    8.08    2.60   0
   4   8 -16   -1.99    2.47   0
   5  -1  15    1.81    2.44   0
   5   1  -7   64.85    2.25   0
   5   2  -9  656.22    4.03   0
   5   3 -11  109.44    2.32   0
   5   8 -16   -1.35    2.77   0
   6  -1   0  123.20    2.83   0
   6   0  -4   56.80    2.05   0
   6   1  -7   93.74    2.15   0
   6   2  -9   51.37    2.28   0
   6   4 -12   22.66    1.98   0
   7  -1   3   12.32    2.97   0
   7   0  -3   37.17    2.19   0
   7   1  -6  274.57    2.95   0
   7   2  -8   -2.66    2.63   0
   7   3 -10   41.75    1.99   0
   7   5 -13    1.35    1.94   0
   7   6 -14   42.85    2.31   0
   8   0  -1   -0.28    1.80   0
   8   1  -5   11.48    1.92   0
   8   2  -7   47.83    2.96   0
   8   3  -9    2.52    2.77   0
   8   4 -11   21.75    2.24   0
   8   5 -12   -2.10    2.78   0
   9   0   3   58.74    2.71   0
   9   0   4    1.36    2.83   0
   9   0   8   -0.02    3.50   0
   9   1  -3    8.50    2.04   0
   9   2  -6    8.58    2.15   0
   9   3  -8   27.64    2.17   0
   9   4 -10   20.11    2.10   0
  10   1   1    4.40    2.27   0
  10   1   2    5.45    3.12   0
  10   2  -3   11.08    2.88   0
  -7   8   8   10.64    3.13   0
  -7   8   9   -2.47    2.34   0
  -7   8  10    9.26    2.40   0
  -7   8  11    3.19    2.29   0
  -7   8  12   16.84    2.33   0
  -7   9   5    6.80    2.42   0
  -7  10   3    0.77    2.56   0
  -6   6   5  212.47    3.75   0
  -6   6  15   59.40    2.49   0
  -6   6  16    4.29    2.78   0
  -6   7   2   49.32    3.10   0
  -6   8   0    8.21    2.43   0
  -5   4   5  127.23    2.87   0
  -5   4   6    2.76    1.83   0
  -5   4  14   -0.16    1.82   0
  -5   4  15   10.46    1.84   0
  -5   5  18   -1.44    1.98   0
  -5   5  19   16.56    2.72   0
  -4   3   3  228.98    3.04   0
  -4   3  16    7.20    1.71   0
  -4   3  17    5.53    2.57   0
  -4   4  20    2.48    1.96   0
  -3   1   9  769.76    4.25   0
  -3   1  10  187.00    3.01   0
  -3   1  11  546.65    3.82   0
  -3   2   2  297.24    3.61   0
  -3   2  17   13.91    1.79   0
  -2   1   2  252.52    3.78   0
  -2   1  16   84.99    2.19   0
  -2   1  17    4.03    2.38   0
  -2   2  20   18.88    1.94   0
  -2  10 -12    0.94    2.13   0
  -1   0   3   42.84    2.08   0
  -1   0  15   93.79    2.12   0
  -1   1  19   -0.41    1.81   0
  -1   2  22   -1.75    1.97   0
  -1   3  -6 2779.98   10.11   0
  -1   5  -9   42.37    2.55   0
  -1   8 -12   29.11    2.38   0
   0  -1   6 1547.42    7.16   0
   0  -1   7  854.41    5.01   0
   0  -1  10  388.31    3.16   0
   0  -1  11  131.26    2.37   0
   0  -1  12    4.88    2.68   0
   0   0  18   63.26    2.59   0
   0   1  21    4.02    1.99   0
   0   4  -9   16.20    1.80   0
   0   9 -14   51.36    2.18   0
   0  11 -15    1.43    2.27   0
   1  -1  15   -2.01    2.53   0
   1   0  19  506.10    3.89   0
   1   1  22    4.29    2.81   0
   1   2  -7  467.95    3.47   0
   1   4 -10   11.11    2.77   0
   1   8 -14   49.35    2.98   0
   2  -1  16   31.55    2.58   0
   2   0  -3  112.47    2.77   0
   2   0  20   12.45    2.48   0
   2   4 -11  170.21    2.51   0
   2   5 -12   90.18    2.70   0
   2   6 -13  109.73    2.89   0
   2   7 -14   11.29    1.80   0
   2   8 -15   19.83    2.12   0
   2  10 -16    0.08    1.93   0
   3  -1   0    3.81    2.50   0
   3  -1  16  220.66    2.93   0
   3   0  20   -1.52    2.59   0
   3   3 -10    0.16    1.93   0
   3   9 -16    0.56    1.99   0
   4  -1  16    0.59    1.94   0
   4   0  -4 1258.29    5.37   0
   4   5 -13    4.29    1.76   0
   4   6 -14   12.59    1.98   0
   4   7 -15   14.04    1.87   0
   4   9 -16   18.28    2.78   0
   5  -1   0  122.94    3.32   0
   5   0  -4    0.49    1.90   0
   5   4 -12   19.74    1.89   0
   5   5 -13  166.51    2.39   0
   5   6 -14  187.79    2.65   0
   6  -1   1  362.38    4.30   0
   6  -1  14   17.64    3.06   0
   6   1  -6    8.44    2.49   0
   6   2  -8   92.84    2.94   0
   6   3 -10    3.86    1.89   0
   6   5 -13   30.88    2.03   0
   6   6 -14   14.49    2.16   0
   6   7 -15    0.16    2.13   0
   7   0  -2   -2.12    2.74   0
   7   1  -5    0.05    2.65   0
   7   4 -11    2.35    2.02   0
   7   5 -12   -4.68    2.57   0
   8   0   0   36.71    2.40   0
   8   1  -4   19.30    1.82   0
   8   4 -10   58.72    2.85   0
   9   0   5    3.98    2.37   0
   9   0   6   -1.52    2.73   0
   9   0   7    0.99    2.83   0
   9   1  -2  107.18    2.63   0
   9   2  -5    2.68    2.09   0
   9   3  -7   19.18    2.70   0
   9   4  -9    1.46    2.05   0
  10   2  -2   40.46    3.01   0
  -7   8   6    4.67    2.91   0
  -7   8   7   24.75    2.43   0
  -7   9   4    8.65    2.42   0
  -7  10   2   33.46    3.09   0
  -6   5   8   48.58    2.83   0
  -6   5   9   42.80    2.20   0
  -6   5  10   31.28    1.90   0
  -6   5  11    3.38    1.92   0
  -6   5  12   -1.34    2.01   0
  -6   5  13   16.47    2.11   0
  -6   5  14   10.79    2.57   0
  -6   6   4   14.50    2.82   0
  -6   6  17    0.27    2.16   0
  -5   4   4   74.73    2.73   0
  -5   4  16   49.15    2.12   0
  -5   4  17   -1.26    1.98   0
  -5   5   1  565.42    5.38   0
  -5   6  -1    2.09    2.60   0
  -4   2   7  218.99    3.41   0
  -4   2   8   99.02    2.37   0
  -4   2   9  399.34    3.32   0
  -4   2  10  328.76    2.92   0
  -4   2  11    0.78    1.80   0
  -4   2  12  387.74    3.05   0
  -4   2  13  241.90    2.82   0
  -4   2  14   28.74    2.52   0
  -4   3  18   12.03    1.76   0
  -4   3  19   33.89    2.50   0
  -4  10  -8    2.88    2.55   0
  -3   1   7   29.47    1.67   0
  -3   1   8   20.36    1.76   0
  -3   1  12  107.16    2.11   0
  -3   1  13   39.92    1.88   0
  -3   2  18   12.06    1.83   0
  -3   2  19   31.01    2.46   0
  -3   3  21    5.21    2.04   0
  -3  10 -10   30.07    2.53   0
  -2   0   8 3453.66    8.23   0
  -2   0   9   36.94    2.09   0
  -2   0  10  134.52    2.25   0
  -2   0  11   -2.66    1.69   0
  -2   0  12   81.32    2.70   0
  -2   1  18    3.63    1.74   0
  -2   2  21    2.55    1.93   0
  -2   9 -11   16.56    2.58   0
  -2  11 -12    2.39    2.82   0
  -1   0  16   -0.10    1.79   0
  -1   0  17    2.26    2.51   0
  -1   1  20   52.62    1.94   0
  -1   6 -10  323.55    3.32   0
  -1   7 -11   22.79    2.02   0
  -1  10 -13   16.88    2.09   0
   0  -1  13  133.30    2.23   0
   0  -1  14   68.18    2.67   0
   0   0  19    2.45    2.56   0
   0   1  22   30.20    2.77   0
   0   5 -10  318.25    3.09   0
   0   6 -11   20.95    2.42   0
   0   7 -12   10.53    2.32   0
   0   8 -13   20.75    1.81   0
   0  10 -14   -0.24    2.44   0
   1  -1  16   58.06    2.64   0
   1   0  20   -0.26    2.23   0
   1   5 -11   -0.66    1.80   0
   1   6 -12  230.95    3.00   0
   1   7 -13   75.64    2.09   0
   1  10 -15   -3.76    2.05   0
   2  -1   1  644.40    9.39   0
   2  -1  17   -3.66    2.44   0
   2   3  -9   39.73    2.35   0
   2   9 -15   -0.38    2.01   0
   3  -2   9   99.29    3.24   0
   3  -1  17    0.95    2.03   0
   3   1  -6  148.19    2.22   0
   3   2  -8   45.62    1.90   0
   3   4 -11    1.60    1.85   0
   3   5 -12   43.17    2.87   0
   3   6 -13  128.17    2.75   0
   3   7 -14    2.69    1.94   0
   4  -1   0  437.69    4.58   0
   4  -1  17    5.37    2.55   0
   4   1  -6   69.52    2.65   0
   4   2  -8  115.85    3.09   0
   4   3 -10  130.39    2.42   0
   4   4 -11    4.60    2.53   0
   4   8 -15    1.90    2.18   0
   5  -1  16    0.87    2.69   0
   5   1  -6   44.56    2.16   0
   5   2  -8   40.05    1.94   0
   5   3 -10   22.76    1.86   0
   5   4 -11  316.61    3.30   0
   5   8 -15   22.49    2.04   0
   6   0  -3   46.17    2.01   0
   6   4 -11   44.77    2.00   0
   6   5 -12    2.26    2.65   0
   6   6 -13   42.18    2.62   0
   6   7 -14   51.80    2.72   0
   6   8 -15   18.09    2.41   0
   7  -1   4  279.10    4.39   0
   7   2  -7    7.74    1.76   0
   7   3  -9   15.67    1.92   0
   7   6 -13   17.55    2.28   0
   7   7 -14    9.44    2.23   0
   8   0   1    2.60    2.34   0
   8   1  -3   13.86    2.57   0
   8   2  -6   38.69    2.16   0
   8   3  -8    9.42    1.93   0
   8   5 -11   -1.17    2.15   0
   8   6 -12   24.49    2.27   0
   9   1  -1   12.36    1.99   0
   9   2  -4    8.75    1.95   0
   9   3  -6   40.60    2.94   0
   9   4  -8    5.38    2.47   0
  10   2  -1   10.89    2.72   0
  -7   7   8   -0.03    2.60   0
  -7   7   9    2.04    1.99   0
  -7   7  10   11.70    2.19   0
  -7   7  11    4.42    2.38   0
  -7   7  12    4.70    2.17   0
  -7   7  13   -1.86    2.23   0
  -7   7  14    8.95    2.43   0
  -7   8   5    4.47    2.00   0
  -6   5   7  225.36    3.15   0
  -6   5  15    4.88    2.19   0
  -6   5  16   16.76    2.01   0
  -6   5  17   13.47    2.47   0
  -6   6   3   59.03    2.78   0
  -6   7   1   22.26    2.91   0
  -5   3   8  219.46    3.16   0
  -5   3   9    4.11    1.91   0
  -5   3  10   19.26    1.86   0
  -5   3  11   93.93    2.29   0
  -5   3  12  106.02    2.22   0
  -5   3  13  108.84    2.24   0
  -5   3  14   -0.34    1.78   0
  -5   3  15  153.34    2.90   0
  -5   4  18   -2.15    2.05   0
  -5   4  19   -5.48    2.02   0
  -5  11  -6    6.59    4.21   0
  -4   2   6  351.55    3.23   0
  -4   2  15    9.16    1.85   0
  -4   2  16   -0.82    1.65   0
  -4   3   2  514.67    4.36   0
  -4   3  20    2.02    1.98   0
  -3   1   6  135.40    2.20   0
  -3   1  15   29.71    1.84   0
  -3   1  16   -2.40    1.74   0
  -3   2  20    0.96    1.96   0
  -3   5  -5  285.50    6.24   0
  -2   0   6  601.32    4.31   0
  -2   0   7   15.06    1.61   0
  -2   0  13   36.83    1.84   0
  -2   0  14  283.24    2.71   0
  -2   1  19  117.07    2.32   0
  -2   1  20    4.76    2.25   0
  -2   2  22   18.17    1.95   0
  -2   5  -7   91.55    2.94   0
  -2   8 -10   28.73    2.55   0
  -1   0  18    3.37    1.60   0
  -1   1  21    5.05    2.20   0
  -1   9 -12    1.06    2.70   0
  -1  11 -13    1.15    2.64   0
   0  -1   5  985.45    6.19   0
   0  -1  15   90.30    2.16   0
   0   1  -3  158.15    3.39   0
   0   3  -7   96.13    2.16   0
   0   9 -13   -4.49    2.66   0
   0  11 -14    3.85    2.44   0
   1  -1  17  102.21    2.22   0
   1   0  21    0.20    2.65   0
   1   3  -8  187.27    2.42   0
   1   9 -14   16.64    1.85   0
   1  11 -15   18.84    2.29   0
   2  -1  18    3.19    2.84   0
   2   0  21    1.31    2.00   0
   2   1  -5  102.37    2.36   0
   2   2  -7  707.03    3.86   0
   2   4 -10  583.96    4.23   0
   2   7 -13    3.63    2.51   0
   2   8 -14    1.10    1.96   0
   2  10 -15    3.97    2.35   0
   3  -2   8   24.95    2.64   0
   3  -2  10   56.62    2.27   0
   3  -2  11   81.20    3.03   0
   3  -1  18   61.83    2.21   0
   3   0  -3 1364.32    6.31   0
   3   3  -9  140.43    2.84   0
   3   9 -15   25.78    2.19   0
   4  -2   8   41.92    3.54   0
   4  -2   9   65.43    3.15   0
   4  -2  10  184.66    3.96   0
   4  -1  18    0.95    2.50   0
   4   5 -12   58.73    2.01   0
   4   6 -13    4.25    1.76   0
   4   7 -14   39.72    2.00   0
   4   9 -15    4.92    2.71   0
   5  -1  17    1.75    2.47   0
   5   0  -3  389.44    3.48   0
   5   5 -12   82.87    2.14   0
   5   6 -13   29.33    2.13   0
   5   7 -14   31.02    2.04   0
   5   9 -15   34.32    2.78   0
   6  -1   2  262.20    3.87   0
   6  -1  15   16.60    2.92   0
   6   0  -2  160.99    2.96   0
   6   1  -5  143.21    2.46   0
   6   2  -7    4.28    2.47   0
   6   3  -9   86.66    2.24   0
   7  -1   5   34.45    3.11   0
   7   0  -1  261.04    3.35   0
   7   1  -4   19.56    1.98   0
   7   3  -8  169.55    3.11   0
   7   4 -10   38.46    2.09   0
   7   5 -11    0.78    1.81   0
   7   6 -12   69.56    2.68   0
   7   7 -13    1.24    2.05   0
   8   0   2    1.97    2.44   0
   8   2  -5   22.42    1.97   0
   8   3  -7   23.25    2.55   0
   8   4  -9   18.52    1.92   0
   8   5 -10   -1.89    2.58   0
   9   1   0    5.02    1.93   0
   9   2  -3    6.88    2.65   0
   9   5  -9   -1.14    2.26   0
  10   2   0   44.43    3.12   0
  10   3  -3    6.71    3.08   0
  -7   6  11    2.17    2.44   0
  -7   6  12   53.60    2.87   0
  -7   6  13   10.07    2.89   0
  -7   7   6   14.21    2.54   0
  -7   7   7    9.35    2.10   0
  -7   8   4   47.53    3.06   0
  -7  10   1    1.23    2.75   0
  -6   4  11   32.38    2.54   0
  -6   4  12   16.18    2.63   0
  -6   4  13   62.18    2.95   0
  -6   5   5   96.42    3.04   0
  -6   5  18    2.69    2.25   0
  -5   3   7   50.66    1.91   0
  -5   3  16    8.81    1.95   0
  -5   3  17    6.54    2.31   0
  -5   4   3   14.79    1.82   0
  -4   2   5 1072.77    5.00   0
  -4   2  17    5.91    1.85   0
  -4   2  18   -2.58    1.92   0
  -4   3  21   13.52    2.12   0
  -4   9  -7    8.28    2.95   0
  -3   1   5  121.49    2.16   0
  -3   1  17    0.84    1.74   0
  -3   1  18   19.58    2.72   0
  -3   2   1 1882.87    8.94   0
  -3   2  21   37.56    2.06   0
  -3   9  -9    2.32    2.20   0
  -3  11 -10    1.91    2.73   0
  -2   0  16  428.55    3.25   0
  -2   0  17   11.31    2.36   0
  -2   1  21   -0.79    2.66   0
  -2   6  -8  214.80    3.62   0
  -2   7  -9   28.27    2.46   0
  -2  10 -11   32.03    2.63   0
  -1  -1   8 1369.50    5.59   0
  -1  -1   9 3281.38    8.10   0
  -1  -1  10   69.76    1.94   0
  -1  -1  11   10.61    1.84   0
  -1  -1  12   15.02    1.94   0
  -1  -1  13    6.22    2.36   0
  -1   0   2    5.06    2.06   0
  -1   1  22    4.88    2.08   0
  -1   4  -7    4.47    1.67   0
  -1   8 -11   34.45    2.53   0
   0  -1  16    7.47    1.78   0
   0  -1  17    8.39    2.46   0
   0   0  21    5.55    2.65   0
   0   2  -5 6944.91   15.59   0
   0   8 -12    1.92    2.44   0
   1  -1  18    5.73    2.06   0
   1   0  22   -2.59    2.87   0
   1   1  -4  254.05    3.42   0
   1   2  -6  614.80    4.16   0
   1   4  -9 1627.60    5.98   0
   1   8 -13   32.63    1.79   0
   1  10 -14    6.11    2.43   0
   2  -2   8   28.57    2.38   0
   2  -2   9   21.93    1.91   0
   2  -2  10  469.36    4.38   0
   2  -2  11  637.32    4.52   0
   2  -2  12  509.18    4.25   0
   2  -1  19   25.22    2.59   0
   2   5 -11   33.13    1.94   0
   2   6 -12   75.60    2.16   0
   2   9 -14    1.66    2.43   0
   3  -2   7   48.43    2.83   0
   3  -2  12    4.39    1.78   0
   3  -2  13  357.41    4.27   0
   3  -1  19   20.10    2.89   0
   3   2  -7    1.17    2.41   0
   3   4 -10  119.07    2.78   0
   3   7 -13    7.86    2.33   0
   3   8 -14   15.86    1.90   0
   3  10 -15    3.06    1.93   0
   4  -2   7  602.43   10.17   0
   4  -2  11  318.14    4.85   0
   4  -2  12  200.26    4.01   0
   4   0  -3    0.92    1.55   0
   4   3  -9  138.58    2.32   0
   4   8 -14    7.98    1.90   0
   4  10 -15    7.28    3.02   0
   5  -1   1  338.49    4.04   0
   5   1  -5  452.59    3.57   0
   5   2  -7   57.78    1.99   0
   5   3  -9    2.18    1.86   0
   5   4 -10  198.88    3.23   0
   5   7 -13   32.58    2.79   0
   5   8 -14   62.48    2.36   0
   6   4 -10   10.45    1.98   0
   6   5 -11    1.58    2.01   0
   6   6 -12    4.06    1.92   0
   6   7 -13   -5.86    2.04   0
   6   8 -14    0.77    2.17   0
   7  -1   6   19.68    2.72   0
   7   0   0   -0.25    2.78   0
   7   2  -6   27.81    1.96   0
   7   4  -9    2.78    2.29   0
   8   1  -2   -1.59    1.76   0
   8   4  -8   14.18    2.42   0
   8   6 -11    8.60    2.12   0
   9   1   1   16.03    1.97   0
   9   2  -2   -2.79    2.61   0
   9   3  -5    1.83    2.02   0
   9   4  -7   -2.01    2.12   0
   9   5  -8   -1.86    2.86   0
  10   2   1   -1.87    2.83   0
  10   3  -2   15.16    3.31   0
  -7   6   8   -0.31    2.57   0
  -7   6   9    0.43    2.06   0
  -7   6  10   54.55    2.32   0
  -7   6  14   30.91    2.29   0
  -7   6  15    3.70    2.25   0
  -7   7   5   43.58    2.94   0
  -7   9   2    4.42    2.90   0
  -6   4   8   -0.02    2.73   0
  -6   4   9   15.09    1.89   0
  -6   4  10    7.17    1.88   0
  -6   4  14   40.83    2.03   0
  -6   4  15    0.38    1.79   0
  -6   4  16    4.27    2.02   0
  -6   4  17   17.70    2.83   0
  -6   6   2   84.16    3.20   0
  -6   8  -1    1.32    2.85   0
  -6   9  -2    5.07    3.17   0
  -5   3  18   22.39    2.05   0
  -5   3  19    9.68    1.92   0
  -4   1  10   18.37    2.38   0
  -4   1  11  528.18    3.92   0
  -4   1  12    0.61    2.62   0
  -4   1  13   22.72    2.52   0
  -4   1  14    4.66    2.12   0
  -4   2   4   98.64    2.91   0
  -4   2  19   11.14    1.95   0
  -4   2  20   43.54    2.85   0
  -4   4  -1  207.39    4.45   0
  -4  11  -8   40.23    3.27   0
  -3   1   4    1.09    1.61   0
  -3   1  19    2.95    1.95   0
  -3   2  22    5.28    2.20   0
  -3   8  -8  159.78    3.64   0
  -2   0   5  398.48    3.89   0
  -2   0  18   14.05    1.79   0
  -2   1   1 2567.20   11.88   0
  -2   1  22    9.44    1.99   0
  -1  -1   7  716.43    4.63   0
  -1  -1  14    5.04    1.80   0
  -1  -1  15   52.88    1.92   0
  -1  -1  16   81.99    2.67   0
  -1   0  20    0.54    1.80   0
  -1   0  21   -1.60    2.50   0
  -1   5  -8  122.66    3.09   0
  -1   7 -10    0.01    2.39   0
  -1  10 -12   18.34    1.87   0
   0  -1   4 3002.85   11.68   0
   0  -1  18   -2.36    1.76   0
   0   0  22   35.74    2.82   0
   0   4  -8 1205.39    5.37   0
   0   7 -11    2.77    2.60   0
   0  10 -13   37.41    2.17   0
   1  -2  10   13.77    2.42   0
   1  -2  11  169.27    3.33   0
   1  -2  12  420.49    3.70   0
   1  -1  19   12.94    2.01   0
   1   5 -10  776.80    4.12   0
   1   6 -11   -0.10    1.82   0
   1   7 -12   20.65    1.86   0
   1   9 -13    4.52    2.65   0
   1  11 -14   -1.48    2.39   0
   2  -2   7   57.77    2.65   0
   2  -2  13  214.38    2.82   0
   2  -2  14   86.73    2.94   0
   2  -1  20   38.02    2.89   0
   2   3  -8  748.87    3.90   0
   2   8 -13  136.49    2.74   0
   2  10 -14    0.12    2.86   0
   3  -2  14    2.76    2.34   0
   3  -1  20   12.01    2.43   0
   3   1  -5  126.41    2.15   0
   3   5 -11  231.62    2.58   0
   3   6 -12   53.36    2.09   0
   3   9 -14   -1.30    1.96   0
   4  -2  13   13.37    2.33   0
   4  -1   1  493.37    5.29   0
   4  -1  19   13.29    2.03   0
   4   1  -5   50.36    1.94   0
   4   2  -7  225.43    2.70   0
   4   4 -10  314.45    2.78   0
   4   5 -11    3.38    1.79   0
   4   7 -13   -1.92    1.94   0
   4   9 -14   65.80    3.08   0
   5  -1  18   20.15    2.69   0
   5   0  -2    3.23    2.46   0
   5   5 -11    4.78    1.72   0
   5   6 -12   15.49    1.90   0
   5   9 -14    4.29    1.98   0
   6  -1   3   43.68    2.88   0
   6  -1  16    1.47    2.82   0
   6   0  -1    4.98    2.38   0
   6   1  -4  125.40    2.48   0
   6   2  -6   19.13    1.90   0
   6   3  -8  217.43    2.79   0
   6   4  -9   20.66    2.56   0
   6   8 -13   54.62    2.72   0
   7  -1   7    1.91    2.79   0
   7   1  -3    0.73    1.98   0
   7   2  -5    2.99    2.31   0
   7   3  -7   -2.07    1.99   0
   7   5 -10   -0.23    2.00   0
   7   6 -11    0.51    2.04   0
   7   7 -12    3.84    2.05   0
   8   0   3    2.82    1.97   0
   8   1  -1   42.09    2.06   0
   8   2  -4   20.56    1.93   0
   8   3  -6    6.88    2.02   0
   8   5  -9    1.41    2.15   0
   8   6 -10    1.50    2.03   0
   8   7 -11    8.17    2.10   0
   9   1   2   18.72    2.33   0
   9   3  -4   43.53    2.45   0
   9   4  -6   -5.43    2.12   0
  -7   5  12   -2.14    2.42   0
  -7   5  13   -5.17    2.97   0
  -7   5  14    7.00    3.02   0
  -7   5  15    3.78    2.56   0
  -7   6   7   -3.37    2.84   0
  -7   8   3   -1.70    1.98   0
  -6   4   7   36.80    2.29   0
  -6   4  18    4.72    2.08   0
  -6   7   0    5.11    2.43   0
  -5   2   9  563.37    3.95   0
  -5   2  10  120.06    2.29   0
  -5   2  11  389.87    3.15   0
  -5   2  12   39.74    2.03   0
  -5   2  13  182.03    2.59   0
  -5   2  14   20.30    1.95   0
  -5   2  15    0.50    1.64   0
  -5   2  16   24.86    2.77   0
  -5   3   5   62.15    2.14   0
  -5   3  20    2.35    1.97   0
  -5   4   2  352.49    3.82   0
  -5   5   0   92.42    3.30   0
  -4   1   8  175.43    3.08   0
  -4   1   9   40.52    2.17   0
  -4   1  15   43.24    1.88   0
  -4   1  16   29.18    1.82   0
  -4   1  17   77.79    2.78   0
  -4   2  21   10.60    2.04   0
  -4   3   1   13.90    1.73   0
  -3   0   9   65.08    1.90   0
  -3   0  10    3.17    1.93   0
  -3   0  12   -1.38    1.82   0
  -3   0  14    0.70    1.68   0
  -3   0  16    4.57    2.19   0
  -3   1  20   13.78    2.05   0
  -3   1  21    3.77    1.97   0
  -3   6  -6    6.07    2.76   0
  -3   7  -7   92.35    3.26   0
  -3  12 -10   11.12    2.16   0
  -2   0  19   -0.29    1.88   0
  -2   0  20    4.16    2.50   0
  -2   9 -10   48.54    2.37   0
  -2  11 -11    0.07    2.04   0
  -1  -1   6  210.32    3.33   0
  -1  -1  17   10.49    1.91   0
  -1   0  22   -3.50    2.68   0
  -1   6  -9   39.10    2.03   0
  -1  11 -12   -1.89    2.84   0
   0  -1  19   52.53    2.15   0
   0   5  -9   41.32    2.14   0
   0   6 -10   25.38    1.79   0
   0   9 -12   53.14    2.81   0
   0  11 -13   -2.31    1.96   0
   1  -2   8 2544.42    8.72   0
   1  -2   9  810.79    4.86   0
   1  -2  13  708.09    4.15   0
   1  -2  14  654.07    3.94   0
   1  -1  20   37.37    2.32   0
   1   3  -7 1328.92    5.50   0
   2  -2  15    2.50    1.77   0
   2  -2  16  137.80    2.82   0
   2  -1  21    6.18    2.45   0
   2   2  -6  306.37    3.30   0
   2   4  -9  117.89    2.24   0
   2   5 -10  341.03    3.38   0
   2   6 -11   25.99    2.42   0
   2   7 -12   80.50    2.02   0
   2  11 -14    1.01    2.69   0
   3  -2   6  139.06    4.64   0
   3  -2  15   36.64    1.96   0
   3  -1   1  197.96    4.08   0
   3   3  -8  782.25    3.94   0
   3   8 -13    4.96    1.96   0
   3  10 -14   20.30    2.05   0
   4  -2  14   32.48    2.64   0
   4   0  -2  467.28    4.46   0
   4   3  -8   22.68    1.82   0
   4   8 -13   62.14    2.16   0
   4  10 -14   -0.55    2.39   0
   5  -1   2  854.62    6.49   0
   5   1  -4    7.06    2.65   0
   5   2  -6   22.94    2.63   0
   5   3  -8  234.66    2.53   0
   5   4  -9  422.51    3.59   0
   5   7 -12   11.51    2.62   0
   6   3  -7  634.66    4.23   0
   6   5 -10   33.64    1.85   0
   6   6 -11   32.55    2.07   0
   6   7 -12    3.57    1.89   0
   6   9 -13   -4.23    2.77   0
   7  -1   8   11.76    3.29   0
   7   0   1  272.23    3.51   0
   7   1  -2   49.95    2.91   0
   7   4  -8   26.58    1.93   0
   7   6 -10   95.93    2.75   0
   7   7 -11    2.47    2.82   0
   7   8 -12   32.79    2.10   0
   8   0   4  102.40    3.43   0
   8   1   0    7.79    2.43   0
   8   2  -3   34.48    1.82   0
   8   3  -5   83.62    2.87   0
   8   4  -7   -0.65    1.93   0
   8   5  -8    9.62    2.32   0
   8   7 -10    7.68    2.79   0
   9   1   3    6.62    2.63   0
   9   2  -1   65.65    2.33   0
   9   3  -3   14.68    2.82   0
   9   4  -5   -2.96    2.60   0
   9   5  -7   -5.06    2.07   0
  -8   8   8    2.52    3.26   0
  -8   8   9    3.56    2.60   0
  -7   5   9    8.91    2.94   0
  -7   5  10    0.46    2.09   0
  -7   5  11    0.88    1.97   0
  -7   5  16    8.93    2.31   0
  -7   6   6    2.09    2.84   0
  -7   7   4   12.22    2.19   0
  -7   9   1    1.99    2.61   0
  -6   3  10    0.29    2.53   0
  -6   3  11  114.37    2.45   0
  -6   3  12   21.84    1.89   0
  -6   3  13    7.82    1.82   0
  -6   3  14   -3.88    1.93   0
  -6   3  15   -3.12    1.94   0
  -6   3  16    7.31    1.85   0
  -6   3  17   26.44    2.97   0
  -6   4   6  154.10    2.76   0
  -6   5   3   11.43    2.64   0
  -5   2   8   39.19    1.93   0
  -5   2  17   -3.83    1.95   0
  -5   2  18   67.50    2.30   0
  -5   2  19   18.08    2.73   0
  -5   3   4  389.83    4.01   0
  -5   7  -3  129.99    6.42   0
  -4   1   7  518.44    3.54   0
  -4   1  18   23.22    1.90   0
  -4   1  19   87.58    2.20   0
  -4   2   3 1387.65    6.61   0
  -4   8  -6    9.21    2.96   0
  -4  12  -8    7.12    2.85   0
  -3   0   8   81.64    1.96   0
  -3   0  17  192.30    2.39   0
  -3   0  18    1.35    1.86   0
  -3   1   3   59.72    2.53   0
  -3   1  22    3.53    2.12   0
  -3  10  -9   10.16    1.98   0
  -2  -1  10  784.87    4.00   0
  -2  -1  11  136.15    2.43   0
  -2  -1  12   95.96    2.23   0
  -2  -1  13   42.47    2.03   0
  -2  -1  14   53.37    1.94   0
  -2  -1  15   93.69    2.22   0
  -2  -1  16   81.56    2.69   0
  -2   0   4 4467.81   11.39   0
  -2   0  21    2.35    2.03   0
  -2  12 -11    1.87    2.48   0
  -1  -1  18  324.85    2.95   0
  -1  -1  19   -0.50    2.53   0
  -1   3  -5  308.02    3.94   0
  -1   9 -11    1.58    1.65   0
  -1  12 -12   11.85    2.45   0
   0  -2  11    7.04    2.46   0
   0  -2  12  961.38    5.03   0
   0  -2  13   26.64    2.65   0
   0  -2  14    5.82    2.29   0
   0  -1  20   24.71    1.97   0
   0  -1  21    0.95    2.48   0
   0   3  -6 1649.39    6.96   0
   0   8 -11    9.91    2.41   0
   0  12 -13   21.94    2.33   0
   1  -2  15    7.58    1.87   0
   1  -2  16    1.67    1.67   0
   1  -1  21    4.27    1.94   0
   1   0  -1 5512.28   19.51   0
   1   7 -11   37.26    2.63   0
   1   8 -12  274.95    2.77   0
   1  10 -13   26.52    1.99   0
   2  -2  17   68.64    2.83   0
   2   1  -4  645.71    4.43   0
   2   9 -13   -0.22    1.97   0
   3  -2  16  188.30    2.93   0
   3  -2  17   23.02    2.57   0
   3   0  -2    0.09    1.77   0
   3   2  -6  868.62    4.11   0
   3   4  -9   53.92    2.09   0
   3   5 -10   15.31    1.84   0
   3   6 -11   33.71    2.05   0
   3   7 -12   65.42    2.11   0
   3   9 -13   -2.28    2.24   0
   3  11 -14    9.09    2.12   0
   4  -2  15    3.09    2.10   0
   4   1  -4  176.25    3.26   0
   4   2  -6  378.18    3.06   0
   4   4  -9    8.03    1.90   0
   4   5 -10    3.18    1.76   0
   4   6 -11    6.53    1.97   0
   4   7 -12    4.57    1.67   0
   4   9 -13    2.32    2.74   0
   5  -2  10  319.98    6.49   0
   5  -2  11  105.26    4.04   0
   5  -2  12   55.12    3.35   0
   5   5 -10   52.46    1.94   0
   5   6 -11   -4.12    1.72   0
   5   9 -13   -1.68    2.04   0
   6  -1   4   40.10    2.83   0
   6   0   0 1477.75    6.59   0
   6   1  -3  203.33    2.73   0
   6   2  -5   21.61    1.98   0
   6   4  -8    0.45    2.60   0
   6   7 -11    4.98    2.67   0
   6   8 -12    9.80    2.10   0
   7  -1   9   83.82    4.94   0
   7   2  -4  134.73    2.53   0
   7   3  -6    2.89    1.72   0
   8   0   5   -0.26    2.76   0
   8   4  -6    1.05    2.42   0
   8   6  -9    3.90    2.04   0
   9   1   4   11.00    2.61   0
   9   2   0   10.10    1.99   0
   9   5  -6   40.63    2.24   0
   9   6  -7    2.13    3.14   0
  -8   7   9    7.05    2.77   0
  -8   7  10    0.32    2.33   0
  -8   7  11   -2.18    2.53   0
  -8   8   7    9.61    3.11   0
  -8   9   5   -0.03    3.00   0
  -7   4  13   19.78    2.47   0
  -7   4  14   -2.13    2.79   0
  -7   4  15   50.36    2.78   0
  -7   4  16   10.10    2.57   0
  -7   5   8    3.94    1.84   0
  -7   6   5   -0.38    2.72   0
  -7  10   0   12.98    3.21   0
  -6   3   9   76.91    2.25   0
  -6   3  18   18.57    2.00   0
  -6   3  19   33.86    2.24   0
  -6   4   5   25.38    2.59   0
  -6   6   1   25.39    2.76   0
  -5   2   7   49.24    1.96   0
  -5   2  20   23.25    2.11   0
  -4   1   6   53.16    2.66   0
  -4   1  20   23.61    2.07   0
  -4   1  21    9.62    2.78   0
  -3   0   7   22.04    1.58   0
  -3   0  19   90.15    2.30   0
  -3   0  20   -2.52    2.08   0
  -2  -1   8 1653.55    5.75   0
  -2  -1   9 2916.68    7.38   0
  -2  -1  17    7.29    1.76   0
  -2  -1  18   -1.63    2.34   0
  -2   0  22    1.30    1.95   0
  -2   4  -5 2182.18   11.29   0
  -2   8  -9    4.11    2.02   0
  -2  10 -10   15.03    2.38   0
  -1  -1   5 2295.75    8.03   0
  -1  -1  20   42.79    1.94   0
  -1   8 -10   43.00    2.07   0
  -1  10 -11    0.16    2.62   0
   0  -2   9  237.42    2.89   0
   0  -2  10  865.15    4.47   0
   0  -2  15   25.11    1.98   0
   0  -2  16    7.75    1.80   0
   0  -1  22   34.02    2.83   0
   0   7 -10   25.23    2.47   0
   0  10 -12   62.84    2.29   0
   1  -2   7 2006.74    8.20   0
   1  -2  17    5.37    1.73   0
   1  -2  18   10.35    2.63   0
   1  -1  22   -1.40    2.15   0
   1   2  -5  644.56    4.75   0
   1   4  -8  129.41    2.29   0
   1   5  -9   -0.92    1.96   0
   1   6 -10   83.86    2.15   0
   1   9 -12   24.35    2.07   0
   1  11 -13    3.43    2.10   0
   1  12 -13    7.18    2.99   0
   2  -2  18   20.36    1.99   0
   2   3  -7  800.00    4.08   0
   2   7 -11    2.25    2.52   0
   2   8 -12   10.59    1.72   0
   2  10 -13   67.91    2.30   0
   3  -2  18   49.55    2.52   0
   3   1  -4    1.26    1.58   0
   3   8 -12   18.97    1.70   0
   3  10 -13   27.19    2.43   0
   4  -2  16   12.95    2.11   0
   4   3  -7   38.30    2.71   0
   4   8 -12   20.22    2.09   0
   4  10 -13   23.74    2.47   0
   5  -2   9  281.47    9.26   0
   5  -2  13  289.71    4.93   0
   5   0  -1  168.84    2.76   0
   5   3  -7   57.03    1.95   0
   5   4  -8   52.16    2.78   0
   5   7 -11    5.56    2.43   0
   5   8 -12  113.18    2.20   0
   5  10 -13    3.03    1.95   0
   6   3  -6   58.07    2.75   0
   6   5  -9   63.04    2.17   0
   6   6 -10   15.31    1.94   0
   6   9 -12    0.06    2.13   0
   7  -1  10    7.90    4.24   0
   7   0   2   -1.83    2.05   0
   7   1  -1   49.05    2.21   0
   7   4  -7  125.92    2.34   0
   7   5  -8   -0.54    1.89   0
   7   6  -9   -2.01    1.92   0
   7   7 -10    6.80    1.97   0
   7   8 -11    5.85    2.14   0
   8   0   6   15.60    2.90   0
   8   1   1   12.74    1.90   0
   8   2  -2    2.76    1.74   0
   8   3  -4   41.18    2.21   0
   8   5  -7   -0.81    1.84   0
   8   6  -8    9.49    2.17   0
   8   7  -9    4.27    2.09   0
   9   1   5    0.55    2.49   0
   9   2   1   42.58    2.73   0
   9   3  -2   26.07    2.19   0
   9   4  -4    3.23    2.12   0
   9   5  -5   17.21    2.83   0
  -8   6  11   10.95    3.06   0
  -8   6  12   13.11    2.30   0
  -8   7   8    2.67    3.02   0
  -8   8   6    2.44    3.11   0
  -7   4  10   31.10    2.90   0
  -7   4  11   -0.34    2.03   0
  -7   4  12   23.21    2.13   0
  -7   4  17    4.83    2.34   0
  -7   5   7    2.31    1.96   0
  -7   7   3   -0.73    2.13   0
  -6   2  13   23.32    2.26   0
  -6   2  14    7.34    2.71   0
  -6   2  15    3.88    2.70   0
  -6   2  16   -3.81    2.26   0
  -6   3   7  523.49    4.18   0
  -5   1  11   90.22    2.15   0
  -5   1  12   40.89    2.01   0
  -5   1  13    3.35    2.02   0
  -5   1  14   -2.65    1.88   0
  -5   1  15   86.38    2.02   0
  -5   1  16   11.63    2.03   0
  -5   1  17   15.57    1.96   0
  -5   1  18   49.31    2.68   0
  -5   2   6   17.34    1.93   0
  -5   3   3  740.89    5.43   0
  -5   4   1   79.12    3.17   0
  -5   6  -2  152.88    4.84   0
  -4   0  11    2.92    1.86   0
  -4   0  12  780.56    3.91   0
  -4   0  13    1.93    1.95   0
  -4   0  14   65.47    1.84   0
  -4   0  15    2.24    1.75   0
  -4   0  16   10.94    1.73   0
  -4   0  17   -4.38    1.90   0
  -4   0  18   -0.06    2.38   0
  -4   6  -4   77.33    5.87   0
  -4   7  -5  121.54    4.69   0
  -4  10  -7    5.40    2.84   0
  -3  -1  13   36.44    2.37   0
  -3  -1  14   20.51    2.46   0
  -3  -1  15   26.80    2.30   0
  -3   0   6   -1.02    1.38   0
  -3   0  21   54.65    2.24   0
  -3   0  22   -5.80    2.68   0
  -3   2   0  485.47    5.56   0
  -3   9  -8    7.44    2.39   0
  -3  11  -9   28.40    2.29   0
  -2  -1   7  346.33    3.31   0
  -2  -1  19  123.16    2.38   0
  -2  -1  20   10.97    2.48   0
  -2   0   3  111.15    3.42   0
  -2   7  -8  157.47    2.82   0
  -1  -2  11  509.46    3.94   0
  -1  -2  12   15.90    2.49   0
  -1  -2  13  636.28    3.56   0
  -1  -2  14   47.08    1.97   0
  -1  -2  15   15.32    2.67   0
  -1  -1  21   15.72    2.10   0
  -1  -1  22    5.77    2.78   0
  -1   4  -6  135.61    2.98   0
  -1   7  -9  319.72    3.62   0
  -1  11 -11    2.85    2.71   0
   0  -2   8  128.16    2.29   0
   0  -2  17   -1.98    1.71   0
   0  -2  18   26.30    2.00   0
   0  -1   3  180.71    3.63   0
   0   4  -7    7.50    1.55   0
   0   5  -8   50.10    2.80   0
   0   6  -9  237.70    2.79   0
   0   9 -11   14.85    2.47   0
   0  11 -12    2.14    1.97   0
   0  12 -12    3.26    2.81   0
   1  -2  19   27.76    1.92   0
   1   1  -3  730.84    5.87   0
   1   8 -11   11.74    2.46   0
   1  10 -12   22.33    2.84   0
   2  -2  19   32.36    2.13   0
   2   4  -8   45.88    1.83   0
   2   5  -9   33.60    2.57   0
   2   6 -10    3.09    1.85   0
   2   9 -12   25.54    2.09   0
   2  11 -13    1.77    1.94   0
   3  -2  19   -0.68    2.57   0
   3   3  -7  683.10    3.76   0
   3   4  -8    5.73    2.55   0
   3   6 -10   72.76    2.66   0
   3   7 -11  158.27    2.60   0
   3  11 -13    2.59    1.94   0
   4  -2  17    3.35    1.98   0
   4   0  -1    1.49    2.52   0
   4   4  -8  495.86    3.27   0
   4   5  -9   13.33    2.61   0
   4   6 -10    8.78    2.39   0
   4   7 -11    0.25    1.86   0
   4   9 -12   20.65    2.48   0
   4  11 -13    3.36    2.03   0
   5  -2  14  139.07    3.85   0
   5  -2  15   21.22    3.04   0
   5  -1   3  314.74    4.85   0
   5   1  -3   39.34    2.03   0
   5   2  -5   33.40    2.08   0
   5   5  -9  102.63    2.22   0
   5   6 -10   15.09    1.75   0
   5   9 -12   23.95    2.01   0
   6   1  -2   18.41    1.78   0
   6   2  -4   24.51    1.84   0
   6   4  -7   45.78    2.68   0
   6   7 -10    0.46    2.36   0
   6   8 -11   42.44    2.18   0
   7  -1  11   16.34    4.86   0
   7   0   3   22.33    2.80   0
   7   2  -3   26.93    2.01   0
   7   4  -6   48.79    2.80   0
   7   8 -10   18.46    2.48   0
   8   0   7    0.09    2.51   0
   8   1   2    8.28    2.46   0
   8   2  -1   39.58    1.93   0
   8   3  -3   25.65    2.57   0
   8   4  -5   10.53    1.97   0
   8   5  -6    3.53    2.51   0
   9   1   6   47.89    2.84   0
   9   2   2    0.52    2.85   0
   9   3  -1   12.60    2.16   0
   9   4  -3   22.65    2.27   0
   9   6  -6    2.91    2.18   0
  -8   6   9   -2.37    2.64   0
  -8   6  10    9.87    2.12   0
  -8   7   7    6.48    3.10   0
  -8   8   5    4.96    2.61   0
  -8   9   4    4.69    3.49   0
  -7   4   9    8.13    1.74   0
  -7   5   6   40.49    2.09   0
  -7   6   4   41.12    2.23   0
  -6   2  10  199.31    3.01   0
  -6   2  11   21.87    1.96   0
  -6   2  12   99.89    2.30   0
  -6   2  17    2.53    1.89   0
  -6   2  18    0.90    1.94   0
  -6   2  19   -2.46    2.03   0
  -6   4   4   16.28    2.01   0
  -6   5   2  133.52    3.68   0
  -5   1   9   13.89    2.45   0
  -5   1  10   69.39    2.17   0
  -5   1  19   18.02    2.10   0
  -5   1  20   44.58    2.19   0
  -5   2   5   29.97    2.86   0
  -4   0   9    0.35    1.97   0
  -4   0  10  330.73    2.91   0
  -4   0  19   -0.94    1.87   0
  -4   0  20   49.29    2.78   0
  -4   1   5   43.98    2.07   0
  -4   2   2 1687.81    7.55   0
  -4   3   0  527.68    5.39   0
  -3  -1  10  200.76    3.11   0
  -3  -1  11  561.83    3.47   0
  -3  -1  12  107.71    2.15   0
  -3  -1  16    0.09    1.69   0
  -3  -1  17    4.64    1.68   0
  -3  -1  18   24.61    2.08   0
  -3   0   5  288.39    3.16   0
  -3  12  -9    1.20    2.51   0
  -2  -1  21    8.53    1.90   0
  -2   5  -6  658.77    5.43   0
  -2   6  -7  315.81    3.73   0
  -2   9  -9   31.87    2.69   0
  -2  11 -10    6.92    1.97   0
  -2  12 -10    1.20    2.62   0
  -1  -2  10  186.11    2.50   0
  -1  -2  16  281.51    2.89   0
  -1  -2  17    5.97    1.76   0
  -1  -2  18    6.97    2.51   0
  -1   2  -3    2.82    2.66   0
  -1   5  -7  507.34    4.38   0
  -1   6  -8   96.57    2.35   0
  -1   9 -10   64.80    2.60   0
  -1  12 -11    7.04    2.40   0
   0  -2   7 1361.19    6.27   0
   0  -2  19  107.10    2.43   0
   0  -2  20   81.78    2.93   0
   0   2  -4  415.06    4.41   0
   1  -2   6    7.83    1.71   0
   1  -2  20   13.93    2.04   0
   1   3  -6  173.59    2.91   0
   1   7 -10   15.88    2.47   0
   1  11 -12   13.11    2.50   0
   2  -2  20    6.29    1.94   0
   2   2  -5 1290.13    5.52   0
   2   8 -11   41.39    2.23   0
   2  10 -12   17.39    1.95   0
   3  -2  20    2.87    2.68   0
   3   2  -5  168.64    2.61   0
   3   5  -9   95.44    2.15   0
   3   8 -11   64.44    2.71   0
   3  10 -12   18.70    2.55   0
   4  -2  18    6.35    1.87   0
   4  -1   2 1283.52    8.17   0
   4   1  -3   25.66    2.34   0
   4   2  -5 1153.38    4.79   0
   4   8 -11   11.35    2.29   0
   4  10 -12   23.10    2.57   0
   5  -2  16   19.16    2.63   0
   5   0   0   -1.92    2.62   0
   5   3  -6  280.48    2.77   0
   5   7 -10    4.01    2.35   0
   5   8 -11    2.37    1.93   0
   5  10 -12   22.94    2.20   0
   6  -1   5    7.83    2.38   0
   6   0   1    4.09    2.10   0
   6   3  -5  275.09    3.26   0
   6   5  -8   60.31    2.10   0
   6   6  -9   36.30    1.85   0
   6   9 -11    4.83    2.00   0
   7   1   0   -0.72    1.89   0
   7   2  -2   38.46    2.81   0
   7   3  -4   34.11    2.66   0
   7   5  -7    6.89    1.87   0
   7   6  -8    4.17    1.89   0
   7   7  -9    2.84    1.89   0
   7   9 -10   12.38    2.51   0
   8   4  -4    8.10    2.72   0
   8   6  -7   28.25    2.10   0
   8   7  -8    9.20    1.92   0
   9   1   7    5.97    2.58   0
   9   3   0    5.90    2.75   0
   9   4  -2   31.77    2.95   0
   9   5  -4    1.58    2.17   0
   9   6  -5    9.11    2.08   0
  -8   5  11   10.82    3.03   0
  -8   5  12    1.96    2.16   0
  -8   5  13   -3.86    2.29   0
  -8   6   8    9.28    3.10   0
  -8   7   6   16.22    3.05   0
  -7   3  11   20.16    2.51   0
  -7   3  12    0.52    2.04   0
  -7   3  13   20.06    1.98   0
  -7   3  14    9.62    2.16   0
  -7   3  15    3.23    2.26   0
  -7   3  16   -1.21    1.97   0
  -7   3  17    6.04    2.07   0
  -7   4   8   21.91    1.94   0
  -7   5   5   23.33    2.64   0
  -7   7   2   -2.65    2.71   0
  -7   8   1   59.50    3.28   0
  -6   2   9   38.10    2.10   0
  -6   3   6   40.75    1.89   0
  -5   1   8  388.80    3.09   0
  -5   5  -1   59.12    2.99   0
  -5  10  -5    9.48    3.44   0
  -4   0   8  223.28    2.67   0
  -4   0  21    3.66    1.94   0
  -3  -1   9  763.09    3.89   0
  -3  -1  19    8.92    1.86   0
  -3  -1  20   16.97    2.03   0
  -3  -1  21   -2.87    2.32   0
  -3   1   2    5.57    1.72   0
  -3   8  -7   32.69    2.89   0
  -2  -2  12  716.61    4.10   0
  -2  -2  13   28.85    1.89   0
  -2  -2  14  116.60    2.25   0
  -2  -2  15   18.34    1.91   0
  -2  -2  16   79.29    2.63   0
  -2  -2  17   48.86    2.34   0
  -2  -1   6  988.87    4.98   0
  -2  -1  22    4.33    1.94   0
  -1  -2   9 1201.60    5.11   0
  -1  -2  19    8.32    1.85   0
  -1  -2  20  107.77    2.85   0
  -1  -1   4  254.23    3.42   0
  -1   0   1 5346.05   19.73   0
   0  -2  21    8.23    2.02   0
   0   8 -10    2.99    1.86   0
   0  10 -11    3.44    1.93   0
   1  -2  21   19.99    2.00   0
   1   4  -7   38.64    2.58   0
   1   5  -8  264.96    3.46   0
   1   6  -9   97.85    2.16   0
   1   9 -11   -3.74    1.69   0
   1  12 -12   11.71    2.01   0
   2  -2  21    3.69    2.04   0
   2   0  -1  838.14    6.70   0
[truncated: 2,785,452 more chars]
